# Supplementary material for: Checklist of British and Irish Hymenoptera - aculeates (Apoidea, Chrysidoidea and Vespoidea)
Source: Biodivers Data J. 2016 Apr 7;(4):e8050. doi: 10.3897/BDJ.4.e8050 (PMC4867696; doi:10.3897/BDJ.4.e8050)
Supplement: Supplementary material 2 — Checklist of the British and Irish aculeates [file biodiversity_data_journal-4-e8050-s002.xlsx]

## Sheet: TAXA
group	seq	usage	rank	ori name	Superfamily	Family	Subfamily	Tribe	Genus	Subgenus	species	authorship	NOTES	Distribution	original genus	original sp spell
Acu	7	valid	Superfamily	APOIDEA Latreille, 1802	APOIDEA							Latreille, 1802	The higher-level classification of the Apoidea follows Pulawski (2013) and Engel (2005). The ‘traditional’ family Sphecidae is paraphyletic with respect to the bee families (here referred to as the Anthophila, an informal taxon, following Engel, 2005) and in Britain and Ireland comprises the families Crabronidae and Sphecidae. Species-level classification of Crabronidae and Sphecidae follows Pula…
Acu	9	valid	Family	Crabronidae Latreille, 1802	APOIDEA	Crabronidae						Latreille, 1802
Acu	11	invalid	Subfamily	Astatinae Lepeletier, 1845	APOIDEA	Crabronidae	Astatinae					Lepeletier, 1845
Acu	13	valid	genus	ASTATA Latreille, 1796	APOIDEA	Crabronidae	Astatinae		Astata			Latreille, 1796
Acu	14	invalid	genus	DIMORPHA Panzer, 1806	APOIDEA	Crabronidae	Astatinae		DIMORPHA			Panzer, 1806
Acu	15	valid	species	boops (Schrank, 1781, Sphex)	APOIDEA	Crabronidae	Astatinae		Astata		boops	(Schrank, 1781)		England	Sphex
Acu	16	invalid	species	abdominalis (Panzer, 1798, Tiphia)	APOIDEA	Crabronidae	Astatinae		Astata		abdominalis	(Panzer, 1798, Tiphia)
Acu	17	invalid	species	pompiliformis (Panzer, 1804, Larra)	APOIDEA	Crabronidae	Astatinae		Astata		pompiliformis	(Panzer, 1804, Larra)
Acu	18	invalid	species	oculata (Jurine, 1807, Dimorpha)	APOIDEA	Crabronidae	Astatinae		Astata		oculata	(Jurine, 1807, Dimorpha)
Acu	19	invalid	species	victor Curtis, 1829	APOIDEA	Crabronidae	Astatinae		Astata		victor	Curtis, 1829
Acu	20	invalid	species	vanderlindeni Robert, 1833	APOIDEA	Crabronidae	Astatinae		Astata		vanderlindeni	Robert, 1833
Acu	21	invalid	species	agilis Smith, 1875	APOIDEA	Crabronidae	Astatinae		Astata		agilis	Smith, 1875
Acu	23	valid	genus	DRYUDELLA Spinola, 1843	APOIDEA	Crabronidae	Astatinae		Dryudella			Spinola, 1843
Acu	24	valid	species	pinguis (Dahlbom, 1832, Larra)	APOIDEA	Crabronidae	Astatinae		Dryudella		pinguis	(Dahlbom, 1832)		England, Scotland, Wales	Larra
Acu	25	invalid	species	stigma misident.	APOIDEA	Crabronidae	Astatinae		Dryudella		stigma	misident.
Acu	26	invalid	species	pinguis (Zetterstedt, 1838, Larra) preocc.	APOIDEA	Crabronidae	Astatinae		Dryudella		pinguis	(Zetterstedt, 1838, Larra) preocc.
Acu	27	invalid	species	jaculator (Smith, 1845, Astata)	APOIDEA	Crabronidae	Astatinae		Dryudella		jaculator	(Smith, 1845, Astata)
Acu	29	valid	Subfamily	BEMBICINAE Latreille, 1802	APOIDEA	Crabronidae	Bembicinae					Latreille, 1802
Acu	31	valid	tribe	ALYSSONTINI Dalla Torre, 1897	APOIDEA	Crabronidae	Bembicinae	Alyssontini				Dalla Torre, 1897
Acu	33	valid	genus	DIDINEIS Wesmael, 1852	APOIDEA	Crabronidae	Bembicinae	Alyssontini	Didineis			Wesmael, 1852
Acu	34	valid	species	lunicornis (Fabricius, 1798, Pompilus)	APOIDEA	Crabronidae	Bembicinae	Alyssontini	Didineis		lunicornis	(Fabricius, 1798)		England	Pompilus
Acu	35	invalid	species	kenedii (Curtis, 1836, Alyson)	APOIDEA	Crabronidae	Bembicinae	Alyssontini	Didineis		kenedii	(Curtis, 1836, Alyson)
Acu	37	valid	tribe	BEMBICINI Latreille, 1802	APOIDEA	Crabronidae	Bembicinae	Bembicini				Latreille, 1802
Acu	39	valid	genus	ARGOGORYTES Ashmead, 1899	APOIDEA	Crabronidae	Bembicinae	Bembicini	Argogorytes			Ashmead, 1899
Acu	40	valid	species	fargeii (Shuckard, 1837, Gorytes)	APOIDEA	Crabronidae	Bembicinae	Bembicini	Argogorytes		fargeii	(Shuckard, 1837)		England, Wales	Gorytes
Acu	41	invalid	species	campestris misident.	APOIDEA	Crabronidae	Bembicinae	Bembicini	Argogorytes		campestris	misident.
Acu	42	invalid	species	mongolensis Tsuneki, 1971	APOIDEA	Crabronidae	Bembicinae	Bembicini	Argogorytes		mongolensis	Tsuneki, 1971
Acu	43	invalid	species	przewalskyi Kazenas, 1971	APOIDEA	Crabronidae	Bembicinae	Bembicini	Argogorytes		przewalskyi	Kazenas, 1971
Acu	44	valid	species	mystaceus (Linnaeus, 1761, Sphex)	APOIDEA	Crabronidae	Bembicinae	Bembicini	Argogorytes		mystaceus	(Linnaeus, 1761)		England, Scotland, Wales, Ireland	Sphex
Acu	45	invalid	species	campestris (Linnaeus, 1761, Vespa)	APOIDEA	Crabronidae	Bembicinae	Bembicini	Argogorytes		campestris	(Linnaeus, 1761, Vespa)
Acu	46	invalid	species	inimica (Harris, 1776, Vespa)	APOIDEA	Crabronidae	Bembicinae	Bembicini	Argogorytes		inimica	(Harris, 1776, Vespa)
Acu	47	invalid	species	longicornis (Rossi, 1790, Sphex)	APOIDEA	Crabronidae	Bembicinae	Bembicini	Argogorytes		longicornis	(Rossi, 1790, Sphex)
Acu	48	invalid	species	bicinctus (Fabricius, 1793, Crabro)	APOIDEA	Crabronidae	Bembicinae	Bembicini	Argogorytes		bicinctus	(Fabricius, 1793, Crabro)
Acu	49	invalid	species	arpactus (Fabricius, 1804, Mellinus)	APOIDEA	Crabronidae	Bembicinae	Bembicini	Argogorytes		arpactus	(Fabricius, 1804, Mellinus)
Acu	50	invalid	species	flavicincta (Donovan, 1808, Vespa)	APOIDEA	Crabronidae	Bembicinae	Bembicini	Argogorytes		flavicincta	(Donovan, 1808, Vespa)
Acu	51	invalid	species	croceipes (Eversmann, 1849, Gorytes)	APOIDEA	Crabronidae	Bembicinae	Bembicini	Argogorytes		croceipes	(Eversmann, 1849, Gorytes)
Acu	52	invalid	species	tonsus (Bondroit, 1933, Gorytes)	APOIDEA	Crabronidae	Bembicinae	Bembicini	Argogorytes		tonsus	(Bondroit, 1933, Gorytes)
Acu	54	valid	genus	GORYTES Latreille, 1805	APOIDEA	Crabronidae	Bembicinae	Bembicini	Gorytes			Latreille, 1805
Acu	55	invalid	genus	ARPACTUS Panzer, 1805	APOIDEA	Crabronidae	Bembicinae	Bembicini	ARPACTUS			Panzer, 1805
Acu	56	invalid	genus	EUZONIA Stephens, 1829	APOIDEA	Crabronidae	Bembicinae	Bembicini	EUZONIA			Stephens, 1829
Acu	57	invalid	genus	EUSPONGUS Lepeletier, 1832	APOIDEA	Crabronidae	Bembicinae	Bembicini	EUSPONGUS			Lepeletier, 1832
Acu	58	invalid	genus	HOPLISUS Lepeletier, 1832	APOIDEA	Crabronidae	Bembicinae	Bembicini	HOPLISUS			Lepeletier, 1832
Acu	59	invalid	genus	LAEVIGORYTES Zavadil, 1948	APOIDEA	Crabronidae	Bembicinae	Bembicini	LAEVIGORYTES			Zavadil, 1948
Acu	60	valid	species	laticinctus (Lepeletier, 1832, Euspongus)	APOIDEA	Crabronidae	Bembicinae	Bembicini	Gorytes		laticinctus	(Lepeletier, 1832)		England, Wales	Euspongus
Acu	61	valid	species	quadrifasciatus (Fabricius, 1804, Mellinus)	APOIDEA	Crabronidae	Bembicinae	Bembicini	Gorytes		quadrifasciatus	(Fabricius, 1804)		England, Wales	Mellinus
Acu	62	invalid	species	vicinus (Lepeletier, 1832, Euspongus)	APOIDEA	Crabronidae	Bembicinae	Bembicini	Gorytes		vicinus	(Lepeletier, 1832, Euspongus)
Acu	63	invalid	species	montivagus (Mocsáry, 1878, Hoplisus)	APOIDEA	Crabronidae	Bembicinae	Bembicini	Gorytes		montivagus	(Mocsáry, 1878, Hoplisus)
Acu	65	valid	genus	HARPACTUS Shuckard, 1837	APOIDEA	Crabronidae	Bembicinae	Bembicini	Harpactus			Shuckard, 1837
Acu	66	invalid	genus	ARPACTUS Jurine, 1807 preocc.	APOIDEA	Crabronidae	Bembicinae	Bembicini	ARPACTUS			Jurine, 1807
Acu	67	invalid	genus	HARPACTES Dahlbom, 1843	APOIDEA	Crabronidae	Bembicinae	Bembicini	HARPACTES			Dahlbom, 1843
Acu	68	invalid	genus	DIENOPLUS Fox, 1893	APOIDEA	Crabronidae	Bembicinae	Bembicini	DIENOPLUS			Fox, 1893
Acu	69	valid	species	tumidus (Panzer, 1801, Pompilus)	APOIDEA	Crabronidae	Bembicinae	Bembicini	Harpactus		tumidus	(Panzer, 1801)		England, Scotland, Wales, Ireland, Isle of Man	Pompilus
Acu	70	invalid	species	japonensis (Tsuneki, 1963, Dienoplus)	APOIDEA	Crabronidae	Bembicinae	Bembicini	Harpactus		japonensis	(Tsuneki, 1963, Dienoplus)
Acu	71	invalid	species	transiliensis Kazenas, 1989	APOIDEA	Crabronidae	Bembicinae	Bembicini	Harpactus		transiliensis	Kazenas, 1989
Acu	73	valid	genus	LESTIPHORUS Lepeletier, 1832	APOIDEA	Crabronidae	Bembicinae	Bembicini	Lestiphorus			Lepeletier, 1832
Acu	74	invalid	genus	HYPOMELLINUS Asmead, 1899	APOIDEA	Crabronidae	Bembicinae	Bembicini	HYPOMELLINUS			Asmead, 1899
Acu	75	invalid	genus	MELLINOGASTRA Asmead, 1899	APOIDEA	Crabronidae	Bembicinae	Bembicini	MELLINOGASTRA			Asmead, 1899
Acu	76	valid	species	bicinctus (Rossi, 1794, Crabro)	APOIDEA	Crabronidae	Bembicinae	Bembicini	Lestiphorus		bicinctus	(Rossi, 1794)		England	Crabro
Acu	78	valid	tribe	NYSSONINI Latreille, 1804	APOIDEA	Crabronidae	Bembicinae	Nyssonini				Latreille, 1804
Acu	80	valid	genus	NYSSON Latreille, 1796	APOIDEA	Crabronidae	Bembicinae	Nyssonini	Nysson			Latreille, 1796
Acu	81	invalid	genus	SYNNEVRUS Costa, 1859	APOIDEA	Crabronidae	Bembicinae	Nyssonini	SYNNEVRUS			Costa, 1859
Acu	82	valid	species	dimidiatus Jurine, 1807	APOIDEA	Crabronidae	Bembicinae	Nyssonini	Nysson		dimidiatus	Jurine, 1807		England, Wales
Acu	83	invalid	species	wesmaeli Lepeletier, 1845	APOIDEA	Crabronidae	Bembicinae	Nyssonini	Nysson		wesmaeli	Lepeletier, 1845
Acu	84	invalid	species	distinguendus Chevrier, 1867	APOIDEA	Crabronidae	Bembicinae	Nyssonini	Nysson		distinguendus	Chevrier, 1867
Acu	85	valid	species	interruptus (Fabricius, 1798, Mellinus)	APOIDEA	Crabronidae	Bembicinae	Nyssonini	Nysson		interruptus	(Fabricius, 1798)		England	Mellinus
Acu	86	invalid	species	spinosus (Fabricius, 1804, Ceropales)	APOIDEA	Crabronidae	Bembicinae	Nyssonini	Nysson		spinosus	(Fabricius, 1804, Ceropales)
Acu	87	invalid	species	panzeri Lepeletier, 1845	APOIDEA	Crabronidae	Bembicinae	Nyssonini	Nysson		panzeri	Lepeletier, 1845
Acu	88	invalid	species	shukardi Wesmael, 1852	APOIDEA	Crabronidae	Bembicinae	Nyssonini	Nysson		shukardi	Wesmael, 1852
Acu	89	valid	species	spinosus (Forster, 1771, Sphex)	APOIDEA	Crabronidae	Bembicinae	Nyssonini	Nysson		spinosus	(Forster, 1771)		England, Scotland, Wales, Ireland	Sphex
Acu	90	invalid	species	?bidens (Linnaeus, 1767, Vespa)	APOIDEA	Crabronidae	Bembicinae	Nyssonini	Nysson		?bidens	(Linnaeus, 1767, Vespa)
Acu	91	invalid	species	spinosus (Fabricius, 1775, Crabro) preocc.	APOIDEA	Crabronidae	Bembicinae	Nyssonini	Nysson		spinosus	(Fabricius, 1775, Crabro) preocc.
Acu	92	invalid	species	tricinctus (Fabricius, 1793, Mellinus)	APOIDEA	Crabronidae	Bembicinae	Nyssonini	Nysson		tricinctus	(Fabricius, 1793, Mellinus)
Acu	93	invalid	species	trilineata (Turton, 1802, Vespa)	APOIDEA	Crabronidae	Bembicinae	Nyssonini	Nysson		trilineata	(Turton, 1802, Vespa)
Acu	94	invalid	species	geniculatus Lepeletier, 1845	APOIDEA	Crabronidae	Bembicinae	Nyssonini	Nysson		geniculatus	Lepeletier, 1845
Acu	95	invalid	species	malasei Gussakovskij, 1932	APOIDEA	Crabronidae	Bembicinae	Nyssonini	Nysson		malasei	Gussakovskij, 1932
Acu	96	valid	species	trimaculatus (Rossi, 1790)	APOIDEA	Crabronidae	Bembicinae	Nyssonini	Nysson		trimaculatus	(Rossi, 1790)		England, Wales	MISSING FROM WORD
Acu	98	valid	Subfamily	Crabroninae Latreille, 1802	APOIDEA	Crabronidae	Crabroninae					Latreille, 1802
Acu	100	valid	tribe	CrabroninI Latreille, 1802	APOIDEA	Crabronidae	Crabroninae	Crabronini				Latreille, 1802
Acu	102	valid	genus	CRABRO Fabricius, 1775	APOIDEA	Crabronidae	Crabroninae	Crabronini	Crabro			Fabricius, 1775
Acu	103	invalid	genus	THYREOPUS Lepeletier & Brullé, 1835	APOIDEA	Crabronidae	Crabroninae	Crabronini	THYREOPUS			Lepeletier & Brullé, 1835
Acu	104	invalid	genus	ANOTHYREUS Dahlbom, 1845	APOIDEA	Crabronidae	Crabroninae	Crabronini	ANOTHYREUS			Dahlbom, 1845
Acu	105	invalid	genus	THYREOCNEMUS Costa, 1871	APOIDEA	Crabronidae	Crabroninae	Crabronini	THYREOCNEMUS			Costa, 1871
Acu	106	invalid	genus	PARANOTHYREUS Ashmead, 1899	APOIDEA	Crabronidae	Crabroninae	Crabronini	PARANOTHYREUS			Ashmead, 1899
Acu	107	invalid	genus	SYNOTHYREOPUS Ashmead, 1899	APOIDEA	Crabronidae	Crabroninae	Crabronini	SYNOTHYREOPUS			Ashmead, 1899
Acu	108	invalid	genus	AGNOSICRABRO Pate, 1944	APOIDEA	Crabronidae	Crabroninae	Crabronini	AGNOSICRABRO			Pate, 1944
Acu	109	invalid	genus	DYSCOLOCRABRO Pate, 1944	APOIDEA	Crabronidae	Crabroninae	Crabronini	DYSCOLOCRABRO			Pate, 1944
Acu	110	invalid	genus	HEMITHYREOPUS Pate, 1944	APOIDEA	Crabronidae	Crabroninae	Crabronini	HEMITHYREOPUS			Pate, 1944
Acu	111	invalid	genus	NORUMBEGA Pate, 1947	APOIDEA	Crabronidae	Crabroninae	Crabronini	NORUMBEGA			Pate, 1947
Acu	112	invalid	genus	PARANOTHYREUS Pate, 1944	APOIDEA	Crabronidae	Crabroninae	Crabronini	PARANOTHYREUS			Pate, 1944
Acu	113	invalid	genus	PARATHYREOPUS Pate, 1944	APOIDEA	Crabronidae	Crabroninae	Crabronini	PARATHYREOPUS			Pate, 1944
Acu	114	invalid	genus	PEMPHILIS Pate, 1944	APOIDEA	Crabronidae	Crabroninae	Crabronini	PEMPHILIS			Pate, 1944
Acu	115	invalid	genus	OTHYREUS Marshakov, 1977	APOIDEA	Crabronidae	Crabroninae	Crabronini	OTHYREUS			Marshakov, 1977
Acu	116	valid	species	cribrarius (Linnaeus, 1758, Vespa)	APOIDEA	Crabronidae	Crabroninae	Crabronini	Crabro		cribrarius	(Linnaeus, 1758)		England, Scotland, Wales, Isle of Man	Vespa	cribraria
Acu	117	invalid	species	patellarius (Schreber, 1784, Sphex)	APOIDEA	Crabronidae	Crabroninae	Crabronini	Crabro		patellarius	(Schreber, 1784, Sphex)
Acu	118	invalid	species	argus (Christ, 1791, Sphex)	APOIDEA	Crabronidae	Crabroninae	Crabronini	Crabro		argus	(Christ, 1791, Sphex)
Acu	119	invalid	species	longa (Christ, 1791, Sphex)	APOIDEA	Crabronidae	Crabroninae	Crabronini	Crabro		longa	(Christ, 1791, Sphex)
Acu	120	invalid	species	lunatus (Christ, 1791, Sphex)	APOIDEA	Crabronidae	Crabroninae	Crabronini	Crabro		lunatus	(Christ, 1791, Sphex)
Acu	121	invalid	species	palmatus Panzer, 1797	APOIDEA	Crabronidae	Crabroninae	Crabronini	Crabro		palmatus	Panzer, 1797
Acu	122	invalid	species	inornatus Mocsáry, 1901	APOIDEA	Crabronidae	Crabroninae	Crabronini	Crabro		inornatus	Mocsáry, 1901
Acu	123	invalid	species	hypotheticus Kokujev, 1927	APOIDEA	Crabronidae	Crabroninae	Crabronini	Crabro		hypotheticus	Kokujev, 1927
Acu	124	valid	species	peltarius (Schreber, 1784, Sphex)	APOIDEA	Crabronidae	Crabroninae	Crabronini	Crabro		peltarius	(Schreber, 1784)		England, Scotland, Wales, Ireland, Isle of Man	Sphex
Acu	125	invalid	species	patellatus Panzer, 1797	APOIDEA	Crabronidae	Crabroninae	Crabronini	Crabro		patellatus	Panzer, 1797
Acu	126	invalid	species	dentipes Panzer, 1797	APOIDEA	Crabronidae	Crabroninae	Crabronini	Crabro		dentipes	Panzer, 1797
Acu	127	invalid	species	mediatus Fabricius, 1798	APOIDEA	Crabronidae	Crabroninae	Crabronini	Crabro		mediatus	Fabricius, 1798
Acu	128	valid	species	scutellatus (von Scheven, 1781, Sphex)	APOIDEA	Crabronidae	Crabroninae	Crabronini	Crabro		scutellatus	(von Scheven, 1781)		England	Sphex
Acu	129	invalid	species	scutularius (Schreber, 1784, Sphex)	APOIDEA	Crabronidae	Crabroninae	Crabronini	Crabro		scutularius	(Schreber, 1784, Sphex)
Acu	130	invalid	species	pterotus Panzer, 1801	APOIDEA	Crabronidae	Crabroninae	Crabronini	Crabro		pterotus	Panzer, 1801
Acu	131	invalid	species	reticulatus (Lepeletier & Brullé, 1835, Ceratocolus)	APOIDEA	Crabronidae	Crabroninae	Crabronini	Crabro		reticulatus	(Lepeletier & Brullé, 1835, Ceratocolus)
Acu	133	valid	genus	CROSSOCERUS Lepeletier & Brullé, 1835	APOIDEA	Crabronidae	Crabroninae	Crabronini	Crossocerus			Lepeletier & Brullé, 1835
Acu	134	valid	subgenus	ABLEPHARIPUS Perkins, 1913	APOIDEA	Crabronidae	Crabroninae	Crabronini	Crossocerus	Ablepharipus		Perkins, 1913
Acu	135	valid	species	congener (Dahlbom, 1844, Crabro)	APOIDEA	Crabronidae	Crabroninae	Crabronini	Crossocerus	Ablepharipus	congener	(Dahlbom, 1844)	added by Archer (2007)	England	Crabro
Acu	136	valid	species	podagricus (Vander Linden, 1829, Crabro)	APOIDEA	Crabronidae	Crabroninae	Crabronini	Crossocerus	Ablepharipus	podagricus	(Vander Linden, 1829)		England, Wales	Crabro
Acu	137	invalid	species	vicinus Dahlbom, 1842	APOIDEA	Crabronidae	Crabroninae	Crabronini	Crossocerus	Ablepharipus	vicinus	Dahlbom, 1842
Acu	138	invalid	species	punctata Šnoflak, 1948	APOIDEA	Crabronidae	Crabroninae	Crabronini	Crossocerus	Ablepharipus	punctata	Šnoflak, 1948
Acu	139	invalid	species	snoflaki Zavadil, 1948	APOIDEA	Crabronidae	Crabroninae	Crabronini	Crossocerus	Ablepharipus	snoflaki	Zavadil, 1948
Acu	141	valid	subgenus	ACANTHOCRABRO Perkins, 1913	APOIDEA	Crabronidae	Crabroninae	Crabronini	Crossocerus	Acanthocrabro		Perkins, 1913
Acu	142	invalid	genus	CORENOCRABRO Tsuneki, 1974	APOIDEA	Crabronidae	Crabroninae	Crabronini	CORENOCRABRO			Tsuneki, 1974
Acu	143	valid	species	vagabundus (Panzer, 1798, Crabro)	APOIDEA	Crabronidae	Crabroninae	Crabronini	Crossocerus		vagabundus	(Panzer, 1798)		England, Wales	Crabro
Acu	144	invalid	species	varus (Panzer, 1799, Crabro) preocc.	APOIDEA	Crabronidae	Crabroninae	Crabronini	Crossocerus		varus	(Panzer, 1799, Crabro) preocc.
Acu	145	invalid	species	bojus (Schrank, 1802, Crabro)	APOIDEA	Crabronidae	Crabroninae	Crabronini	Crossocerus		bojus	(Schrank, 1802, Crabro)
Acu	146	invalid	species	quinquemaculatus (Lepeletier & Brullé, 1835, Blepharipus)	APOIDEA	Crabronidae	Crabroninae	Crabronini	Crossocerus		quinquemaculatus	(Lepeletier & Brullé, 1835, Blepharipus)
Acu	147	invalid	species	lefebvrei Lepeletier & Brullé, 1835	APOIDEA	Crabronidae	Crabroninae	Crabronini	Crossocerus		lefebvrei	Lepeletier & Brullé, 1835
Acu	148	invalid	species	fasciatus (Costa, 1871, Crabro)	APOIDEA	Crabronidae	Crabroninae	Crabronini	Crossocerus		fasciatus	(Costa, 1871, Crabro)
Acu	149	invalid	species	esakii (Yasumatsu, 1942, Crabro)	APOIDEA	Crabronidae	Crabroninae	Crabronini	Crossocerus		esakii	(Yasumatsu, 1942, Crabro)
Acu	150	invalid	species	ectemiformis (Tsuneki, 1974, Corenocrabro)	APOIDEA	Crabronidae	Crabroninae	Crabronini	Crossocerus		ectemiformis	(Tsuneki, 1974, Corenocrabro)
Acu	152	valid	subgenus	BLEPHARIPUS Lepeletier & Brullé, 1835	APOIDEA	Crabronidae	Crabroninae	Crabronini	Crossocerus	Blepharipus		Lepeletier & Brullé, 1835
Acu	153	invalid	genus	COELOCRABRO Thomson, 1874	APOIDEA	Crabronidae	Crabroninae	Crabronini	COELOCRABRO			Thomson, 1874
Acu	154	valid	species	annulipes (Lepeletier & Brullé, 1835, Blepharipus)	APOIDEA	Crabronidae	Crabroninae	Crabronini	Crossocerus		annulipes	(Lepeletier & Brullé, 1835)		England, Scotland, Wales	Blepharipus
Acu	155	invalid	species	gonager (Lepeletier & Brullé, 1835, Blepharipus)	APOIDEA	Crabronidae	Crabroninae	Crabronini	Crossocerus		gonager	(Lepeletier & Brullé, 1835, Blepharipus)
Acu	156	invalid	species	nigritus (Gimmerthal, 1836, Crabro)	APOIDEA	Crabronidae	Crabroninae	Crabronini	Crossocerus		nigritus	(Gimmerthal, 1836, Crabro)
Acu	157	invalid	species	ambiguus (Dahlbom, 1842, Crabro)	APOIDEA	Crabronidae	Crabroninae	Crabronini	Crossocerus		ambiguus	(Dahlbom, 1842, Crabro)
Acu	158	invalid	species	capito (Dahlbom, 1845, Crabro)	APOIDEA	Crabronidae	Crabroninae	Crabronini	Crossocerus		capito	(Dahlbom, 1845, Crabro)
Acu	159	invalid	species	parkeri (Banks, 1921, Blepharipus)	APOIDEA	Crabronidae	Crabroninae	Crabronini	Crossocerus		parkeri	(Banks, 1921, Blepharipus)
Acu	160	invalid	species	davidsoni (Sandhouse, 1938, Crabro)	APOIDEA	Crabronidae	Crabroninae	Crabronini	Crossocerus		davidsoni	(Sandhouse, 1938, Crabro)
Acu	161	valid	species	capitosus (Shuckard, 1837, Crabro)	APOIDEA	Crabronidae	Crabroninae	Crabronini	Crossocerus		capitosus	(Shuckard, )		England, Scotland, Wales, Ireland	Crabro
Acu	162	invalid	species	annulus (Dahlbom, 1838, Crabro)	APOIDEA	Crabronidae	Crabroninae	Crabronini	Crossocerus		annulus	(Dahlbom, 1838, Crabro)
Acu	163	invalid	species	yezo Tsuneki, 1960	APOIDEA	Crabronidae	Crabroninae	Crabronini	Crossocerus		yezo	Tsuneki, 1960
Acu	164	valid	species	cetratus (Shuckard, 1837, Crabro)	APOIDEA	Crabronidae	Crabroninae	Crabronini	Crossocerus		cetratus	(Shuckard, )		England, Wales, Ireland	Crabro
Acu	165	invalid	species	vanderlindeni (Dahlbom, 1838, Crabro)	APOIDEA	Crabronidae	Crabroninae	Crabronini	Crossocerus		vanderlindeni	(Dahlbom, 1838, Crabro)
Acu	166	invalid	species	dilatatus (Herrich-Schäffer, 1841, Crabro)	APOIDEA	Crabronidae	Crabroninae	Crabronini	Crossocerus		dilatatus	(Herrich-Schäffer, 1841, Crabro)
Acu	167	invalid	species	inornatus (Matsumura, 1912, Crabro)	APOIDEA	Crabronidae	Crabroninae	Crabronini	Crossocerus		inornatus	(Matsumura, 1912, Crabro)
Acu	168	invalid	species	dentsukanus Tsuneki, 1976	APOIDEA	Crabronidae	Crabroninae	Crabronini	Crossocerus		dentsukanus	Tsuneki, 1976
Acu	169	valid	species	leucostomus (Linnaeus, 1758, Sphex)	APOIDEA	Crabronidae	Crabroninae	Crabronini	Crossocerus		leucostomus	(Linnaeus, )		England, Scotland	Sphex	leucostoma
Acu	170	invalid	species	carbonarius (Dahlbom, 1838, Crabro)	APOIDEA	Crabronidae	Crabroninae	Crabronini	Crossocerus		carbonarius	(Dahlbom, 1838, Crabro)
Acu	171	invalid	species	rugosus (Herrich-Schäffer, 1841, Crabro)	APOIDEA	Crabronidae	Crabroninae	Crabronini	Crossocerus		rugosus	(Herrich-Schäffer, 1841, Crabro)
Acu	172	invalid	species	melanarius (Wesmael, 1852, Crabro)	APOIDEA	Crabronidae	Crabroninae	Crabronini	Crossocerus		melanarius	(Wesmael, 1852, Crabro)
Acu	173	invalid	species	cinctipes (Provancher, 1882, Blepharipus)	APOIDEA	Crabronidae	Crabroninae	Crabronini	Crossocerus		cinctipes	(Provancher, 1882, Blepharipus)
Acu	174	invalid	species	niger (Provancher, 1888, Crabro)	APOIDEA	Crabronidae	Crabroninae	Crabronini	Crossocerus		niger	(Provancher, 1888, Crabro)
Acu	175	invalid	species	nigror (Fox, 1895, Crabro)	APOIDEA	Crabronidae	Crabroninae	Crabronini	Crossocerus		nigror	(Fox, 1895, Crabro)
Acu	176	invalid	species	servus (Dalla Torre, 1897, Crabro)	APOIDEA	Crabronidae	Crabroninae	Crabronini	Crossocerus		servus	(Dalla Torre, 1897, Crabro)
Acu	177	invalid	species	cinctitarsis (Ashmead, 1901, Stenocrabro)	APOIDEA	Crabronidae	Crabroninae	Crabronini	Crossocerus		cinctitarsis	(Ashmead, 1901, Stenocrabro)
Acu	178	invalid	species	columbiae (Bradley, 1906, Blepharipus)	APOIDEA	Crabronidae	Crabroninae	Crabronini	Crossocerus		columbiae	(Bradley, 1906, Blepharipus)
Acu	179	invalid	species	stygius (Mickel, 1916, Thyreopus)	APOIDEA	Crabronidae	Crabroninae	Crabronini	Crossocerus		stygius	(Mickel, 1916, Thyreopus)
Acu	180	invalid	species	utensis (Mickel, 1916, Thyreopus)	APOIDEA	Crabronidae	Crabroninae	Crabronini	Crossocerus		utensis	(Mickel, 1916, Thyreopus)
Acu	181	valid	species	megacephalus (Rossi, 1790, Crabro)	APOIDEA	Crabronidae	Crabroninae	Crabronini	Crossocerus		megacephalus	(Rossi, )		England, Scotland, Wales, Ireland, Isle of Man	Crabro
Acu	182	invalid	species	leucostoma misident.	APOIDEA	Crabronidae	Crabroninae	Crabronini	Crossocerus		leucostoma	misident.
Acu	183	invalid	species	bidens (Haliday, 1833, Crabro)	APOIDEA	Crabronidae	Crabroninae	Crabronini	Crossocerus		bidens	(Haliday, 1833, Crabro)
Acu	184	invalid	species	niger Lepeletier & Brullé, 1835	APOIDEA	Crabronidae	Crabroninae	Crabronini	Crossocerus		niger	Lepeletier & Brullé, 1835
Acu	185	invalid	species	rufipes Lepeletier & Brullé, 1835	APOIDEA	Crabronidae	Crabroninae	Crabronini	Crossocerus		rufipes	Lepeletier & Brullé, 1835
Acu	186	invalid	species	laeviceps (Smith, 1856, Crabro)	APOIDEA	Crabronidae	Crabroninae	Crabronini	Crossocerus		laeviceps	(Smith, 1856, Crabro)
Acu	187	invalid	species	bison (Costa, 1884, Crabro)	APOIDEA	Crabronidae	Crabroninae	Crabronini	Crossocerus		bison	(Costa, 1884, Crabro)
Acu	188	invalid	species	?zaidamensis (Radoszkowski, 1887, Crabro)	APOIDEA	Crabronidae	Crabroninae	Crabronini	Crossocerus		?zaidamensis	(Radoszkowski, 1887, Crabro)
Acu	189	invalid	species	leucostomoides (Richards, 1935, Coelocrabro)	APOIDEA	Crabronidae	Crabroninae	Crabronini	Crossocerus		leucostomoides	(Richards, 1935, Coelocrabro)
Acu	190	valid	species	nigritus (Lepeletier & Brullé, 1835, Blepharipus)	APOIDEA	Crabronidae	Crabroninae	Crabronini	Crossocerus		nigritus	(Lepeletier & Brullé, 1835)		England, Wales	Blepharipus
Acu	191	invalid	species	pubescens (Shuckard, 1837, Crabro)	APOIDEA	Crabronidae	Crabroninae	Crabronini	Crossocerus		pubescens	(Shuckard, 1837, Crabro)
Acu	192	invalid	species	diversipes Herrich-Schäffer, 1841	APOIDEA	Crabronidae	Crabroninae	Crabronini	Crossocerus		diversipes	Herrich-Schäffer, 1841
Acu	193	invalid	species	inermis (Thomson, 1870, Crabro)	APOIDEA	Crabronidae	Crabroninae	Crabronini	Crossocerus		inermis	(Thomson, 1870, Crabro)
Acu	194	invalid	species	melanogaster Kohl, 1880	APOIDEA	Crabronidae	Crabroninae	Crabronini	Crossocerus		melanogaster	Kohl, 1880
Acu	195	invalid	species	nigricornis (Provancher, 1888, Blepharipus)	APOIDEA	Crabronidae	Crabroninae	Crabronini	Crossocerus		nigricornis	(Provancher, 1888, Blepharipus)
Acu	196	invalid	species	sambucicola (Verhoeff, 1891, Crabro)	APOIDEA	Crabronidae	Crabroninae	Crabronini	Crossocerus		sambucicola	(Verhoeff, 1891, Crabro)
Acu	197	invalid	species	verhoeffi Tsuneki, 1967	APOIDEA	Crabronidae	Crabroninae	Crabronini	Crossocerus		verhoeffi	Tsuneki, 1967
Acu	198	invalid	species	sudai Tsuneki, 1976	APOIDEA	Crabronidae	Crabroninae	Crabronini	Crossocerus		sudai	Tsuneki, 1976
Acu	199	invalid	species	babai Tsuneki, 1979	APOIDEA	Crabronidae	Crabroninae	Crabronini	Crossocerus		babai	Tsuneki, 1979
Acu	200	valid	species	styrius (Kohl, 1892, Crabro)	APOIDEA	Crabronidae	Crabroninae	Crabronini	Crossocerus		styrius	(Kohl, )		England	Crabro
Acu	201	invalid	species	pauxillus (Gussakovskij, 1932, Crabro)	APOIDEA	Crabronidae	Crabroninae	Crabronini	Crossocerus		pauxillus	(Gussakovskij, 1932, Crabro)
Acu	202	invalid	species	sugiharai (Iwata, 1938, Crabro)	APOIDEA	Crabronidae	Crabroninae	Crabronini	Crossocerus		sugiharai	(Iwata, 1938, Crabro)
Acu	203	invalid	species	pilicornis Tsuneki, 1977	APOIDEA	Crabronidae	Crabroninae	Crabronini	Crossocerus		pilicornis	Tsuneki, 1977
Acu	204	valid	species	walkeri (Shuckard, 1837, Crabro)	APOIDEA	Crabronidae	Crabroninae	Crabronini	Crossocerus		walkeri	(Shuckard, )		England, Scotland, Wales	Crabro
Acu	205	invalid	species	aphidium misident.	APOIDEA	Crabronidae	Crabroninae	Crabronini	Crossocerus		aphidium	misident.
Acu	206	invalid	species	geniculatus (Shuckard, 1837, Crabro)	APOIDEA	Crabronidae	Crabroninae	Crabronini	Crossocerus		geniculatus	(Shuckard, 1837, Crabro)
Acu	207	invalid	species	clypearis (Schenck, 1857, Crabro)	APOIDEA	Crabronidae	Crabroninae	Crabronini	Crossocerus		clypearis	(Schenck, 1857, Crabro)
Acu	208	invalid	species	cloevorax (Nielson, 1901, Crabro)	APOIDEA	Crabronidae	Crabroninae	Crabronini	Crossocerus		cloevorax	(Nielson, 1901, Crabro)
Acu	210	valid	subgenus	CROSSOCERUS Lepeletier & Brullé, 1835	APOIDEA	Crabronidae	Crabroninae	Crabronini	Crossocerus	Crossocerus		Lepeletier & Brullé, 1835
Acu	211	invalid	genus	STENOCRABRO Ashmead, 1899	APOIDEA	Crabronidae	Crabroninae	Crabronini	STENOCRABRO			Ashmead, 1899
Acu	212	invalid	genus	ISCHNOLYNTHUS Holmberg, 1903	APOIDEA	Crabronidae	Crabroninae	Crabronini	ISCHNOLYNTHUS			Holmberg, 1903
Acu	213	valid	species	distinguendus (Morawitz, 1866, Crabro)	APOIDEA	Crabronidae	Crabroninae	Crabronini	Crossocerus		distinguendus	(Morawitz, )	added by Packer (1981)	England	Crabro
Acu	214	invalid	species	mucronatus (Thomson, 1870, Crabro)	APOIDEA	Crabronidae	Crabroninae	Crabronini	Crossocerus		mucronatus	(Thomson, 1870, Crabro)
Acu	215	valid	species	elongatulus (Vander Linden, 1829, Crabro)	APOIDEA	Crabronidae	Crabroninae	Crabronini	Crossocerus		elongatulus	(Vander, Crabro)	The British population is considered to belong to the subspecies annulatus Lepeletier & Brullé (synonyms: proximus, hyalinus, transversalis, obliquus, propinquus, berlandi).	England, Scotland, Wales, Isle of Man	Crabro
Acu	216	invalid	species	annulatus Lepeletier & Brullé, 1835	APOIDEA	Crabronidae	Crabroninae	Crabronini	Crossocerus		annulatus	Lepeletier & Brullé, 1835
Acu	217	invalid	species	varipes Lepeletier & Brullé, 1835	APOIDEA	Crabronidae	Crabroninae	Crabronini	Crossocerus		varipes	Lepeletier & Brullé, 1835
Acu	218	invalid	species	affinis Lepeletier & Brullé, 1835	APOIDEA	Crabronidae	Crabroninae	Crabronini	Crossocerus		affinis	Lepeletier & Brullé, 1835
Acu	219	invalid	species	luteipalpis Lepeletier & Brullé, 1835	APOIDEA	Crabronidae	Crabroninae	Crabronini	Crossocerus		luteipalpis	Lepeletier & Brullé, 1835
Acu	220	invalid	species	morio Lepeletier & Brullé, 1835	APOIDEA	Crabronidae	Crabroninae	Crabronini	Crossocerus		morio	Lepeletier & Brullé, 1835
Acu	221	invalid	species	pallidipalpis Lepeletier & Brullé, 1835	APOIDEA	Crabronidae	Crabroninae	Crabronini	Crossocerus		pallidipalpis	Lepeletier & Brullé, 1835
Acu	222	invalid	species	proximus (Shuckard, 1837, Crabro)	APOIDEA	Crabronidae	Crabroninae	Crabronini	Crossocerus		proximus	(Shuckard, 1837, Crabro)
Acu	223	invalid	species	hyalinus (Shuckard, 1837, Crabro)	APOIDEA	Crabronidae	Crabroninae	Crabronini	Crossocerus		hyalinus	(Shuckard, 1837, Crabro)
Acu	224	invalid	species	transversalis (Shuckard, 1837, Crabro)	APOIDEA	Crabronidae	Crabroninae	Crabronini	Crossocerus		transversalis	(Shuckard, 1837, Crabro)
Acu	225	invalid	species	obliquus (Shuckard, 1837, Crabro)	APOIDEA	Crabronidae	Crabroninae	Crabronini	Crossocerus		obliquus	(Shuckard, 1837, Crabro)
Acu	226	invalid	species	propinquus (Shuckard, 1837, Crabro)	APOIDEA	Crabronidae	Crabroninae	Crabronini	Crossocerus		propinquus	(Shuckard, 1837, Crabro)
Acu	227	invalid	species	brevis (Eversmann, 1849, Crabro)	APOIDEA	Crabronidae	Crabroninae	Crabronini	Crossocerus		brevis	(Eversmann, 1849, Crabro)
Acu	228	invalid	species	scutellaris (Smith, 1851, Crabro)	APOIDEA	Crabronidae	Crabroninae	Crabronini	Crossocerus		scutellaris	(Smith, 1851, Crabro)
Acu	229	invalid	species	sulcus (Fox, 1895, Crabro)	APOIDEA	Crabronidae	Crabroninae	Crabronini	Crossocerus		sulcus	(Fox, 1895, Crabro)
Acu	230	invalid	species	plesius (Rohwer, 1912, Stenocrabro)	APOIDEA	Crabronidae	Crabroninae	Crabronini	Crossocerus		plesius	(Rohwer, 1912, Stenocrabro)
Acu	231	invalid	species	berlandi (Richards, 1928, Crabro)	APOIDEA	Crabronidae	Crabroninae	Crabronini	Crossocerus		berlandi	(Richards, 1928, Crabro)
Acu	232	valid	species	exiguus (Vander Linden, 1829, Crabro)	APOIDEA	Crabronidae	Crabroninae	Crabronini	Crossocerus		exiguus	(Vander, Crabro)		England	Crabro
Acu	233	invalid	species	aphidum Lepeletier & Brullé, 1835	APOIDEA	Crabronidae	Crabroninae	Crabronini	Crossocerus		aphidum	Lepeletier & Brullé, 1835
Acu	234	valid	species	ovalis Lepeletier & Brullé, 1835	APOIDEA	Crabronidae	Crabroninae	Crabronini	Crossocerus		ovalis	Lepeletier & Brullé, 1835		England, Scotland, Wales
Acu	235	invalid	species	punctum (Zetterstedt, 1838, Crabro)	APOIDEA	Crabronidae	Crabroninae	Crabronini	Crossocerus		punctum	(Zetterstedt, 1838, Crabro)
Acu	236	invalid	species	anxius (Wesmael, 1852, Crabro)	APOIDEA	Crabronidae	Crabroninae	Crabronini	Crossocerus		anxius	(Wesmael, 1852, Crabro)
Acu	237	invalid	species	shuckardi (Smith, 1856, Crabro)	APOIDEA	Crabronidae	Crabroninae	Crabronini	Crossocerus		shuckardi	(Smith, 1856, Crabro)
Acu	238	invalid	species	ovatus (Schulz, 1906, Crabro)	APOIDEA	Crabronidae	Crabroninae	Crabronini	Crossocerus		ovatus	(Schulz, 1906, Crabro)
Acu	239	valid	species	palmipes (Linnaeus, 1767, Sphex)	APOIDEA	Crabronidae	Crabroninae	Crabronini	Crossocerus		palmipes	(Linnaeus, )		England, Scotland, Isle of Man	Sphex
Acu	240	invalid	species	palmarius (Schreber, 1784, Sphex)	APOIDEA	Crabronidae	Crabroninae	Crabronini	Crossocerus		palmarius	(Schreber, 1784, Sphex)
Acu	241	invalid	species	scutatus (Fabricius, 1787, Crabro)	APOIDEA	Crabronidae	Crabroninae	Crabronini	Crossocerus		scutatus	(Fabricius, 1787, Crabro)
Acu	242	invalid	species	ornatus Lepeletier & Brullé, 1835	APOIDEA	Crabronidae	Crabroninae	Crabronini	Crossocerus		ornatus	Lepeletier & Brullé, 1835
Acu	243	invalid	species	scutellaris (Gimmerthal, 1836, Crabro)	APOIDEA	Crabronidae	Crabroninae	Crabronini	Crossocerus		scutellaris	(Gimmerthal, 1836, Crabro)
Acu	244	invalid	species	gracilis (Eversmann, 1849, Crabro)	APOIDEA	Crabronidae	Crabroninae	Crabronini	Crossocerus		gracilis	(Eversmann, 1849, Crabro)
Acu	245	invalid	species	decoratus (Smith, 1856, Crabro)	APOIDEA	Crabronidae	Crabroninae	Crabronini	Crossocerus		decoratus	(Smith, 1856, Crabro)
Acu	246	valid	species	tarsatus (Shuckard, 1837, Crabro)	APOIDEA	Crabronidae	Crabroninae	Crabronini	Crossocerus		tarsatus	(Shuckard, )		England, Scotland, Wales, Ireland, Isle of Man	Crabro
Acu	247	invalid	species	palmipes misident.	APOIDEA	Crabronidae	Crabroninae	Crabronini	Crossocerus		palmipes	misident.
Acu	248	invalid	species	palmatus De Stefani Perez, 1884 preocc,	APOIDEA	Crabronidae	Crabroninae	Crabronini	Crossocerus		palmatus	De Stefani Perez, 1884 preocc,
Acu	249	valid	species	varus Lepeletier & Brullé, 1835 nomen protectum	APOIDEA	Crabronidae	Crabroninae	Crabronini	Crossocerus		varus	Lepeletier & Brullé, 1835 nomen protectum		England, Scotland, Wales, Ireland, Isle of Man
Acu	250	invalid	species	varius misspelling	APOIDEA	Crabronidae	Crabroninae	Crabronini	Crossocerus		varius	misspelling
Acu	251	invalid	species	pusillus Lepeletier & Brullé, 1835	APOIDEA	Crabronidae	Crabroninae	Crabronini	Crossocerus		pusillus	Lepeletier & Brullé, 1835
Acu	252	invalid	species	striatulus Lepeletier & Brullé, 1835	APOIDEA	Crabronidae	Crabroninae	Crabronini	Crossocerus		striatulus	Lepeletier & Brullé, 1835
Acu	253	invalid	species	spinipectus (Shuckard, 1837, Crabro)	APOIDEA	Crabronidae	Crabroninae	Crabronini	Crossocerus		spinipectus	(Shuckard, 1837, Crabro)
Acu	254	invalid	species	striatus Lepeletier, 1845	APOIDEA	Crabronidae	Crabroninae	Crabronini	Crossocerus		striatus	Lepeletier, 1845
Acu	255	invalid	species	intricatus (Smith, 1856, Crabro)	APOIDEA	Crabronidae	Crabroninae	Crabronini	Crossocerus		intricatus	(Smith, 1856, Crabro)
Acu	256	invalid	species	lepeletieri (Smith, 1856, Crabro)	APOIDEA	Crabronidae	Crabroninae	Crabronini	Crossocerus		lepeletieri	(Smith, 1856, Crabro)
Acu	257	valid	species	wesmaeli (Vander Linden, 1829, Crabro)	APOIDEA	Crabronidae	Crabroninae	Crabronini	Crossocerus		wesmaeli	(Vander, Crabro)		England, Scotland, Wales, Ireland	Crabro
Acu	258	invalid	species	maurus (Lepeletier & Brullé, 1835, Ceratocolus)	APOIDEA	Crabronidae	Crabroninae	Crabronini	Crossocerus		maurus	(Lepeletier & Brullé, 1835, Ceratocolus)
Acu	259	invalid	species	ziegleri (Lepeletier & Brullé, 1835, Ceratocolus)	APOIDEA	Crabronidae	Crabroninae	Crabronini	Crossocerus		ziegleri	(Lepeletier & Brullé, 1835, Ceratocolus)
Acu	261	valid	subgenus	CUPHOPTERUS Morawitz, 1866	APOIDEA	Crabronidae	Crabroninae	Crabronini	Crossocerus	Cuphopterus		Morawitz, 1866
Acu	262	valid	species	binotatus Lepeletier & Brullé, 1835	APOIDEA	Crabronidae	Crabroninae	Crabronini	Crossocerus	Cuphopterus	binotatus	Lepeletier & Brullé, 1835		England, Wales
Acu	263	invalid	species	signatus (Panzer, 1798, Crabro) preocc.	APOIDEA	Crabronidae	Crabroninae	Crabronini	Crossocerus	Cuphopterus	signatus	(Panzer, 1798, Crabro) preocc.
Acu	264	invalid	species	monstrosus (Dahlbom, 1845, Crabro)	APOIDEA	Crabronidae	Crabroninae	Crabronini	Crossocerus	Cuphopterus	monstrosus	(Dahlbom, 1845, Crabro)
Acu	265	invalid	species	confusus (Schulz, 1906, Crabro)	APOIDEA	Crabronidae	Crabroninae	Crabronini	Crossocerus	Cuphopterus	confusus	(Schulz, 1906, Crabro)
Acu	266	valid	species	dimidiatus (Fabricius, 1781, Crabro)	APOIDEA	Crabronidae	Crabroninae	Crabronini	Crossocerus	Cuphopterus	dimidiatus	(Fabricius, )		England, Scotland, Wales, Ireland	Crabro
Acu	267	invalid	species	subpunctatus (Rossi, 1790, Crabro)	APOIDEA	Crabronidae	Crabroninae	Crabronini	Crossocerus	Cuphopterus	subpunctatus	(Rossi, 1790, Crabro)
Acu	268	invalid	species	sexmaculatus (Olivier, 1792, Crabro)	APOIDEA	Crabronidae	Crabroninae	Crabronini	Crossocerus	Cuphopterus	sexmaculatus	(Olivier, 1792, Crabro)
Acu	269	invalid	species	signatus (Olivier, 1792, Crabro)	APOIDEA	Crabronidae	Crabroninae	Crabronini	Crossocerus	Cuphopterus	signatus	(Olivier, 1792, Crabro)
Acu	270	invalid	species	serripes (Panzer, 1797, Crabro)	APOIDEA	Crabronidae	Crabroninae	Crabronini	Crossocerus	Cuphopterus	serripes	(Panzer, 1797, Crabro)
Acu	271	invalid	species	notatus (Illiger, 1807, Crabro)	APOIDEA	Crabronidae	Crabroninae	Crabronini	Crossocerus	Cuphopterus	notatus	(Illiger, 1807, Crabro)
Acu	272	invalid	species	pauperatus (Lepeletier & Brullé, 1835, Blepharipus)	APOIDEA	Crabronidae	Crabroninae	Crabronini	Crossocerus	Cuphopterus	pauperatus	(Lepeletier & Brullé, 1835, Blepharipus)
Acu	273	invalid	species	armipes (von Sebold, 1844, Crabro)	APOIDEA	Crabronidae	Crabroninae	Crabronini	Crossocerus	Cuphopterus	armipes	(von Sebold, 1844, Crabro)
Acu	275	valid	subgenus	HOPLOCRABRO Thomson, 1874	APOIDEA	Crabronidae	Crabroninae	Crabronini	Crossocerus	Hoplocrabro		Thomson, 1874
Acu	276	valid	species	quadrimaculatus (Fabricius, 1793, Crabro)	APOIDEA	Crabronidae	Crabroninae	Crabronini	Crossocerus	Hoplocrabro	quadrimaculatus	(Fabricius, )		England, Scotland, Wales, Ireland	Crabro
Acu	277	invalid	species	quadripunctatus (Fabricius, 1793, Crabro)	APOIDEA	Crabronidae	Crabroninae	Crabronini	Crossocerus	Hoplocrabro	quadripunctatus	(Fabricius, 1793, Crabro)
Acu	278	invalid	species	murorum (Latreille, 1805, Crabro)	APOIDEA	Crabronidae	Crabroninae	Crabronini	Crossocerus	Hoplocrabro	murorum	(Latreille, 1805, Crabro)
Acu	279	invalid	species	levipes (Vander Linden, 1829, Crabro)	APOIDEA	Crabronidae	Crabroninae	Crabronini	Crossocerus	Hoplocrabro	levipes	Vander Linden, 1829, Crabro)
Acu	280	invalid	species	bimaculatus Lepeletier & Brullé, 1835	APOIDEA	Crabronidae	Crabroninae	Crabronini	Crossocerus	Hoplocrabro	bimaculatus	Lepeletier & Brullé, 1835
Acu	281	invalid	species	quniquemaculatus (Dahlbom, 1838, Crabro)	APOIDEA	Crabronidae	Crabroninae	Crabronini	Crossocerus	Hoplocrabro	quniquemaculatus	(Dahlbom, 1838, Crabro)
Acu	282	invalid	species	rotundarius (Dahlbom, 1838, Crabro)	APOIDEA	Crabronidae	Crabroninae	Crabronini	Crossocerus	Hoplocrabro	rotundarius	(Dahlbom, 1838, Crabro)
Acu	284	valid	genus	ECTEMNIUS Dahlbom, 1845	APOIDEA	Crabronidae	Crabroninae	Crabronini	Ectemnius			Dahlbom, 1845
Acu	285	valid	subgenus	CLYTOCHRYSUS Morawitz, 1864	APOIDEA	Crabronidae	Crabroninae	Crabronini	Ectemnius	Clytochrysus		Morawitz, 1864
Acu	286	valid	species	cavifrons (Thomson, 1870, Crabro)	APOIDEA	Crabronidae	Crabroninae	Crabronini	Ectemnius	Clytochrysus	cavifrons	(Thomson, )		England, Scotland, Wales, Ireland, Isle of Man	Crabro
Acu	287	invalid	species	cephalotes misident.	APOIDEA	Crabronidae	Crabroninae	Crabronini	Ectemnius	Clytochrysus	cephalotes	misident.
Acu	288	valid	species	lapidarius (Panzer, 1804, Crabro)	APOIDEA	Crabronidae	Crabroninae	Crabronini	Ectemnius	Clytochrysus	lapidarius	(Panzer, )		England, Scotland, Wales, Ireland, Isle of Man	Crabro
Acu	289	invalid	species	?cinctus (Spinola, 1806, Crabro)	APOIDEA	Crabronidae	Crabroninae	Crabronini	Ectemnius	Clytochrysus	?cinctus	(Spinola, 1806, Crabro)
Acu	290	invalid	species	chrysostomus (Lepeletier & Brullé, 1835, Crabro)	APOIDEA	Crabronidae	Crabroninae	Crabronini	Ectemnius	Clytochrysus	chrysostomus	(Lepeletier & Brullé, 1835, Crabro)
Acu	291	invalid	species	comptus (Lepeletier & Brullé, 1835, Crabro)	APOIDEA	Crabronidae	Crabroninae	Crabronini	Ectemnius	Clytochrysus	comptus	(Lepeletier & Brullé, 1835, Crabro)
Acu	292	invalid	species	xylurgus (Shuckard, 1837, Crabro)	APOIDEA	Crabronidae	Crabroninae	Crabronini	Ectemnius	Clytochrysus	xylurgus	(Shuckard, 1837, Crabro)
Acu	293	invalid	species	interstinctus (Smith, 1856, Crabro)	APOIDEA	Crabronidae	Crabroninae	Crabronini	Ectemnius	Clytochrysus	interstinctus	(Smith, 1856, Crabro)
Acu	294	invalid	species	obscurus (Smith, 1856, Crabro)	APOIDEA	Crabronidae	Crabroninae	Crabronini	Ectemnius	Clytochrysus	obscurus	(Smith, 1856, Crabro)
Acu	295	invalid	species	gracilissimus (Packard, 1866, Crabro)	APOIDEA	Crabronidae	Crabroninae	Crabronini	Ectemnius	Clytochrysus	gracilissimus	(Packard, 1866, Crabro)
Acu	296	invalid	species	denticulatus (Packard, 1866, Crabro)	APOIDEA	Crabronidae	Crabroninae	Crabronini	Ectemnius	Clytochrysus	denticulatus	(Packard, 1866, Crabro)
Acu	297	invalid	species	effosus (Packard, 1866, Crabro)	APOIDEA	Crabronidae	Crabroninae	Crabronini	Ectemnius	Clytochrysus	effosus	(Packard, 1866, Crabro)
Acu	298	invalid	species	papagorum (Viereck, 1908, Crabro)	APOIDEA	Crabronidae	Crabroninae	Crabronini	Ectemnius	Clytochrysus	papagorum	(Viereck, 1908, Crabro)
Acu	299	valid	species	ruficornis (Zetterstedt, 1838, Crabro)	APOIDEA	Crabronidae	Crabroninae	Crabronini	Ectemnius	Clytochrysus	ruficornis	(Zetterstedt, )		England, Wales	Crabro
Acu	300	invalid	species	aurilabris (Herrich-Schäffer, 1841, Crabro)	APOIDEA	Crabronidae	Crabroninae	Crabronini	Ectemnius	Clytochrysus	aurilabris	(Herrich-Schäffer, 1841, Crabro)
Acu	301	invalid	species	nigrifrons (Cresson, 1865, Crabro)	APOIDEA	Crabronidae	Crabroninae	Crabronini	Ectemnius	Clytochrysus	nigrifrons	(Cresson, 1865, Crabro)
Acu	302	invalid	species	contiguus (Cresson, 1865, Crabro)	APOIDEA	Crabronidae	Crabroninae	Crabronini	Ectemnius	Clytochrysus	contiguus	(Cresson, 1865, Crabro)
Acu	303	invalid	species	septentrionalis (Packard, 1866, Crabro)	APOIDEA	Crabronidae	Crabroninae	Crabronini	Ectemnius	Clytochrysus	septentrionalis	(Packard, 1866, Crabro)
Acu	304	invalid	species	planifrons (Thomson, 1870, Crabro)	APOIDEA	Crabronidae	Crabroninae	Crabronini	Ectemnius	Clytochrysus	planifrons	(Thomson, 1870, Crabro)
Acu	305	invalid	species	longipalpis (Verhöff, 1892, Crabro)	APOIDEA	Crabronidae	Crabroninae	Crabronini	Ectemnius	Clytochrysus	longipalpis	(Verhöff, 1892, Crabro)
Acu	306	invalid	species	lineatotarsis (Matsumura, 1911, Crabro)	APOIDEA	Crabronidae	Crabroninae	Crabronini	Ectemnius	Clytochrysus	lineatotarsis	(Matsumura, 1911, Crabro)
Acu	307	invalid	species	chipsani (Matsumura, 1912, Crabro)	APOIDEA	Crabronidae	Crabroninae	Crabronini	Ectemnius	Clytochrysus	chipsani	(Matsumura, 1912, Crabro)
Acu	308	valid	species	sexcinctus (Fabricius, 1775, Crabro)	APOIDEA	Crabronidae	Crabroninae	Crabronini	Ectemnius	Clytochrysus	sexcinctus	(Fabricius, )		England, Wales	Crabro
Acu	309	invalid	species	planifrons misident.	APOIDEA	Crabronidae	Crabroninae	Crabronini	Ectemnius	Clytochrysus	planifrons	misident.
Acu	310	invalid	species	quadricinctus (Fabricius, 1787, Crabro)	APOIDEA	Crabronidae	Crabroninae	Crabronini	Ectemnius	Clytochrysus	quadricinctus	(Fabricius, 1787, Crabro)
Acu	311	invalid	species	interruptefasciatus (Retzius, 1783, Sphex)	APOIDEA	Crabronidae	Crabroninae	Crabronini	Ectemnius	Clytochrysus	interruptefasciatus	(Retzius, 1783, Sphex)
Acu	312	invalid	species	tibialis (Olivier, 1792, Crabro)	APOIDEA	Crabronidae	Crabroninae	Crabronini	Ectemnius	Clytochrysus	tibialis	(Olivier, 1792, Crabro)
Acu	313	invalid	species	8 maculata (Preyssler, 1793, Crabro)	APOIDEA	Crabronidae	Crabroninae	Crabronini	Ectemnius	Clytochrysus	8 maculata	(Preyssler, 1793, Crabro)
Acu	314	invalid	species	zonatus (Panzer, 1797, Crabro)	APOIDEA	Crabronidae	Crabroninae	Crabronini	Ectemnius	Clytochrysus	zonatus	(Panzer, 1797, Crabro)
Acu	315	invalid	species	vespiformis (Panzer, 1798, Crabro)	APOIDEA	Crabronidae	Crabroninae	Crabronini	Ectemnius	Clytochrysus	vespiformis	(Panzer, 1798, Crabro)
Acu	316	invalid	species	octomaculatus (Schrank, 1802, Crabro)	APOIDEA	Crabronidae	Crabroninae	Crabronini	Ectemnius	Clytochrysus	octomaculatus	(Schrank, 1802, Crabro)
Acu	317	invalid	species	cinctus (Spinola, 1806, Crabro)	APOIDEA	Crabronidae	Crabroninae	Crabronini	Ectemnius	Clytochrysus	cinctus	(Spinola, 1806, Crabro)
Acu	318	invalid	species	flavipes (Lepeletier & Brullé, 1835, Crabro)	APOIDEA	Crabronidae	Crabroninae	Crabronini	Ectemnius	Clytochrysus	flavipes	(Lepeletier & Brullé, 1835, Crabro)
Acu	319	invalid	species	tetraedrus (Blanchard, 1940, Crabro)	APOIDEA	Crabronidae	Crabroninae	Crabronini	Ectemnius	Clytochrysus	tetraedrus	(Blanchard, 1940, Crabro)
Acu	320	invalid	species	saundersi (Perkins, 1899, Crabro)	APOIDEA	Crabronidae	Crabroninae	Crabronini	Ectemnius	Clytochrysus	saundersi	(Perkins, 1899, Crabro)
Acu	321	invalid	species	yosemite Pate, 1946	APOIDEA	Crabronidae	Crabroninae	Crabronini	Ectemnius	Clytochrysus	yosemite	Pate, 1946
Acu	323	valid	subgenus	ECTEMNIUS Dahlbom, 1845	APOIDEA	Crabronidae	Crabroninae	Crabronini	Ectemnius	Ectemnius		Dahlbom, 1845
Acu	324	valid	species	borealis (Zetterstedt, 1838, Crabro)	APOIDEA	Crabronidae	Crabroninae	Crabronini	Ectemnius	Ectemnius	borealis	(Zetterstedt, )		England	Crabro
Acu	325	invalid	species	bipunctatus (Zetterstedt, 1838, Crabro)	APOIDEA	Crabronidae	Crabroninae	Crabronini	Ectemnius	Ectemnius	bipunctatus	(Zetterstedt, 1838, Crabro)
Acu	326	invalid	species	nigrinus (Herrich-Schäffer, 1841, Crabro)	APOIDEA	Crabronidae	Crabroninae	Crabronini	Ectemnius	Ectemnius	nigrinus	(Herrich-Schäffer, 1841, Crabro)
Acu	327	invalid	species	parvulus (Packard, 1866, Crabro)	APOIDEA	Crabronidae	Crabroninae	Crabronini	Ectemnius	Ectemnius	parvulus	(Packard, 1866, Crabro)
Acu	328	invalid	species	gredleri (Kohl, 1878, Lindenius)	APOIDEA	Crabronidae	Crabroninae	Crabronini	Ectemnius	Ectemnius	gredleri	(Kohl, 1878, Lindenius)
Acu	329	invalid	species	proletarius (Mickel, 1916, Crabro)	APOIDEA	Crabronidae	Crabroninae	Crabronini	Ectemnius	Ectemnius	proletarius	(Mickel, 1916, Crabro)
Acu	330	valid	species	dives (Lepeletier & Brullé, 1835, Solenius)	APOIDEA	Crabronidae	Crabroninae	Crabronini	Ectemnius	Ectemnius	dives	(Lepeletier & Brullé, 1835)		England, Wales	Solenius
Acu	331	invalid	species	octonotatus (Lepeletier & Brullé, 1835, Solenius)	APOIDEA	Crabronidae	Crabroninae	Crabronini	Ectemnius	Ectemnius	octonotatus	(Lepeletier & Brullé, 1835, Solenius)
Acu	332	invalid	species	octavonotatus (Lepeletier & Brullé, 1835, Solenius)	APOIDEA	Crabronidae	Crabroninae	Crabronini	Ectemnius	Ectemnius	octavonotatus	(Lepeletier & Brullé, 1835, Solenius)
Acu	333	invalid	species	alatulus (Dahlbom, 1838, Crabro)	APOIDEA	Crabronidae	Crabroninae	Crabronini	Ectemnius	Ectemnius	alatulus	(Dahlbom, 1838, Crabro)
Acu	334	invalid	species	pictipes (Herrich-Schäffer, 1841, Crabro)	APOIDEA	Crabronidae	Crabroninae	Crabronini	Ectemnius	Ectemnius	pictipes	(Herrich-Schäffer, 1841, Crabro)
Acu	335	invalid	species	auratus (Smith, 1856, Crabro)	APOIDEA	Crabronidae	Crabroninae	Crabronini	Ectemnius	Ectemnius	auratus	(Smith, 1856, Crabro)
Acu	336	invalid	species	montanus (Cresson, 1865, Crabro) preocc.	APOIDEA	Crabronidae	Crabroninae	Crabronini	Ectemnius	Ectemnius	montanus	(Cresson, 1865, Crabro) preocc.
Acu	337	invalid	species	cristatus (Packard, 1866, Crabro)	APOIDEA	Crabronidae	Crabroninae	Crabronini	Ectemnius	Ectemnius	cristatus	(Packard, 1866, Crabro)
Acu	338	invalid	species	cubiceps (Packard, 1866, Crabro)	APOIDEA	Crabronidae	Crabroninae	Crabronini	Ectemnius	Ectemnius	cubiceps	(Packard, 1866, Crabro)
Acu	339	invalid	species	heraclei (Rohwer, 1908, Crabro)	APOIDEA	Crabronidae	Crabroninae	Crabronini	Ectemnius	Ectemnius	heraclei	(Rohwer, 1908, Crabro)
Acu	340	invalid	species	montivagans (Strand, 1916, Crabro)	APOIDEA	Crabronidae	Crabroninae	Crabronini	Ectemnius	Ectemnius	montivagans	(Strand, 1916, Crabro)
Acu	342	valid	subgenus	HYPOCRABRO Ashmead, 1899	APOIDEA	Crabronidae	Crabroninae	Crabronini	Ectemnius	Hypocrabro		Ashmead, 1899
Acu	343	invalid	genus	XESTOCRABRO Ashmead, 1899	APOIDEA	Crabronidae	Crabroninae	Crabronini	XESTOCRABRO			Ashmead, 1899
Acu	344	valid	species	continuus (Fabricius, 1804, Crabro)	APOIDEA	Crabronidae	Crabroninae	Crabronini	Ectemnius		continuus	(Fabricius, 1804)		England, Scotland, Wales, Ireland	Crabro
Acu	345	invalid	species	vagus misident.	APOIDEA	Crabronidae	Crabroninae	Crabronini	Ectemnius		vagus	misident.
Acu	346	invalid	species	sexmaculatus (Say, 1824 Crabro) preocc.	APOIDEA	Crabronidae	Crabroninae	Crabronini	Ectemnius		sexmaculatus	(Say, 1824, Crabro) preocc.
Acu	347	invalid	species	fuscitarsis (Herrich-Schäffer, 1841, Crabro)	APOIDEA	Crabronidae	Crabroninae	Crabronini	Ectemnius		fuscitarsis	(Herrich-Schäffer, 1841, Crabro)
Acu	348	invalid	species	vagatus (Smith, 1869, Crabro)	APOIDEA	Crabronidae	Crabroninae	Crabronini	Ectemnius		vagatus	(Smith, 1869, Crabro)
Acu	349	invalid	species	pumilus (Costa, 1871, Crabro)	APOIDEA	Crabronidae	Crabroninae	Crabronini	Ectemnius		pumilus	(Costa, 1871, Crabro)
Acu	350	invalid	species	granulatus (Walker, 1871, Crabro)	APOIDEA	Crabronidae	Crabroninae	Crabronini	Ectemnius		granulatus	(Walker, 1871, Crabro)
Acu	351	invalid	species	rugopunctatus (Taschenberg, 1875, Crabro)	APOIDEA	Crabronidae	Crabroninae	Crabronini	Ectemnius		rugopunctatus	(Taschenberg, 1875, Crabro)
Acu	352	invalid	species	validus (De Stefani Perez, 1884, Crabro)	APOIDEA	Crabronidae	Crabroninae	Crabronini	Ectemnius		validus	(De Stefani Perez, 1884, Crabro)
Acu	353	invalid	species	bizexmaculatus (Viereck, 1910, Crabro)	APOIDEA	Crabronidae	Crabroninae	Crabronini	Ectemnius		bizexmaculatus	(Viereck, 1910, Crabro)
Acu	354	invalid	species	sayi (Cockerell, 1910, Crabro)	APOIDEA	Crabronidae	Crabroninae	Crabronini	Ectemnius		sayi	(Cockerell, 1910, Crabro)
Acu	355	invalid	species	giffardi (Rohwer, 1917, Solenius)	APOIDEA	Crabronidae	Crabroninae	Crabronini	Ectemnius		giffardi	(Rohwer, 1917, Solenius)
Acu	356	valid	species	rubicola (Dufour & Perris, 1840, Solenius)	APOIDEA	Crabronidae	Crabroninae	Crabronini	Ectemnius		rubicola	(Dufour & Perris, 184)		England, Wales	Solenius
Acu	357	invalid	species	microstictus (Herrich-Schäffer, 1841, Crabro)	APOIDEA	Crabronidae	Crabroninae	Crabronini	Ectemnius		microstictus	(Herrich-Schäffer, 1841, Crabro)
Acu	358	invalid	species	larvatus (Wesmael, 1852, Crabro)	APOIDEA	Crabronidae	Crabroninae	Crabronini	Ectemnius		larvatus	(Wesmael, 1852, Crabro)
Acu	359	invalid	species	pumilus (Costa, 1871, Crabro)	APOIDEA	Crabronidae	Crabroninae	Crabronini	Ectemnius		pumilus	(Costa, 1871, Crabro)
Acu	361	valid	subgenus	METACRABRO Ashmead, 1899	APOIDEA	Crabronidae	Crabroninae	Crabronini	Ectemnius	Metacrabro		Ashmead, 1899
Acu	362	valid	species	cephalotes (Olivier, 1792, Crabro)	APOIDEA	Crabronidae	Crabroninae	Crabronini	Ectemnius	Metacrabro	cephalotes	(Olivier, 1792)		England, Scotland, Wales, Ireland	Crabro
Acu	363	invalid	species	quadricinctus misident.	APOIDEA	Crabronidae	Crabroninae	Crabronini	Ectemnius	Metacrabro	quadricinctus	misident.
Acu	364	invalid	species	floralis (Olivier, 1792, Crabro)	APOIDEA	Crabronidae	Crabroninae	Crabronini	Ectemnius	Metacrabro	floralis	(Olivier, 1792, Crabro)
Acu	365	invalid	species	geniculatus (Olivier, 1792, Crabro)	APOIDEA	Crabronidae	Crabroninae	Crabronini	Ectemnius	Metacrabro	geniculatus	(Olivier, 1792, Crabro)
Acu	366	invalid	species	tibialis (Olivier, 1792, Crabro)	APOIDEA	Crabronidae	Crabroninae	Crabronini	Ectemnius	Metacrabro	tibialis	(Olivier, 1792, Crabro)
Acu	367	invalid	species	?cephalotes (Panzer, 1799, Crabro)	APOIDEA	Crabronidae	Crabroninae	Crabronini	Ectemnius	Metacrabro	?cephalotes	(Panzer, 1799, Crabro)
Acu	368	invalid	species	striatus (Lepeletier & Brullé, 1835, Crabro)	APOIDEA	Crabronidae	Crabroninae	Crabronini	Ectemnius	Metacrabro	striatus	(Lepeletier & Brullé, 1835, Crabro)
Acu	369	invalid	species	ornatus (Lepeletier & Brullé, 1835, Crabro)	APOIDEA	Crabronidae	Crabroninae	Crabronini	Ectemnius	Metacrabro	ornatus	(Lepeletier & Brullé, 1835, Crabro)
Acu	370	invalid	species	striatulus (Lepeletier & Brullé, 1835, Blepharipus)	APOIDEA	Crabronidae	Crabroninae	Crabronini	Ectemnius	Metacrabro	striatulus	(Lepeletier & Brullé, 1835, Blepharipus)
Acu	371	invalid	species	lindenius (Shuckard, 1837, Crabro)	APOIDEA	Crabronidae	Crabroninae	Crabronini	Ectemnius	Metacrabro	lindenius	(Shuckard, 1837, Crabro)
Acu	372	invalid	species	shuckardi (Dahlbom, 1838, Crabro)	APOIDEA	Crabronidae	Crabroninae	Crabronini	Ectemnius	Metacrabro	shuckardi	(Dahlbom, 1838, Crabro)
Acu	373	invalid	species	interruptus (Dahlbom, 1845, Crabro) preocc.	APOIDEA	Crabronidae	Crabroninae	Crabronini	Ectemnius	Metacrabro	interruptus	(Dahlbom, 1845, Crabro) preocc.
Acu	374	invalid	species	fargeii (Smith, 1856, Crabro)	APOIDEA	Crabronidae	Crabroninae	Crabronini	Ectemnius	Metacrabro	fargeii	(Smith, 1856, Crabro)
Acu	375	invalid	species	aciculatus (Provancher, 1882, Crabro)	APOIDEA	Crabronidae	Crabroninae	Crabronini	Ectemnius	Metacrabro	aciculatus	(Provancher, 1882, Crabro)
Acu	376	invalid	species	ruthenicus (Morawitz, 1892, Crabro)	APOIDEA	Crabronidae	Crabroninae	Crabronini	Ectemnius	Metacrabro	ruthenicus	(Morawitz, 1892, Crabro)
Acu	377	valid	species	lituratus (Panzer, 1805, Crabro)	APOIDEA	Crabronidae	Crabroninae	Crabronini	Ectemnius	Metacrabro	lituratus	(Panzer, 1805)		England, Wales	Crabro
Acu	378	invalid	species	petiolatus (Lepeletier & Brullé, 1835, Solenius)	APOIDEA	Crabronidae	Crabroninae	Crabronini	Ectemnius	Metacrabro	petiolatus	(Lepeletier & Brullé, 1835, Solenius)
Acu	379	invalid	species	fasciatus (Lepeletier & Brullé, 1835, Ceratocolus)	APOIDEA	Crabronidae	Crabroninae	Crabronini	Ectemnius	Metacrabro	fasciatus	(Lepeletier & Brullé, 1835, Ceratocolus)
Acu	380	invalid	species	reticulatus (Lepeletier & Brullé, 1835, Ceratoculus [lapsus])	APOIDEA	Crabronidae	Crabroninae	Crabronini	Ectemnius	Metacrabro	reticulatus	(Lepeletier & Brullé, 1835, Ceratoculus [lapsus])
Acu	381	invalid	species	kollari (Dahlbom, 1845, Crabro)	APOIDEA	Crabronidae	Crabroninae	Crabronini	Ectemnius	Metacrabro	kollari	(Dahlbom, 1845, Crabro)
Acu	382	invalid	species	argenteus (Schenck, 1857, Crabro)	APOIDEA	Crabronidae	Crabroninae	Crabronini	Ectemnius	Metacrabro	argenteus	(Schenck, 1857, Crabro)
Acu	383	invalid	species	vestitus (Smith, 1858, Crabro)	APOIDEA	Crabronidae	Crabroninae	Crabronini	Ectemnius	Metacrabro	vestitus	(Smith, 1858, Crabro)
Acu	384	invalid	species	intermedius (Morawitz, 1866, Crabro)	APOIDEA	Crabronidae	Crabroninae	Crabronini	Ectemnius	Metacrabro	intermedius	(Morawitz, 1866, Crabro)
Acu	385	invalid	species	luxuriosus (Costa, 1871, Crabro)	APOIDEA	Crabronidae	Crabroninae	Crabronini	Ectemnius	Metacrabro	luxuriosus	(Costa, 1871, Crabro)
Acu	387	valid	genus	ENTOMOGNATHUS Dahlbom, 1844	APOIDEA	Crabronidae	Crabroninae	Crabronini	Entomognathus			Dahlbom, 1844
Acu	388	invalid	genus	KOXINGA Pate, 1944	APOIDEA	Crabronidae	Crabroninae	Crabronini	KOXINGA			Pate, 1944
Acu	389	invalid	genus	MASHONA Pate, 1944	APOIDEA	Crabronidae	Crabroninae	Crabronini	MASHONA			Pate, 1944
Acu	390	invalid	genus	TONCAHUA Pate, 1944	APOIDEA	Crabronidae	Crabroninae	Crabronini	TONCAHUA			Pate, 1944
Acu	391	invalid	genus	FLORKINUS Leclercq, 1956	APOIDEA	Crabronidae	Crabroninae	Crabronini	FLORKINUS			Leclercq, 1956
Acu	392	invalid	genus	BIHARGNATHUS Leclercq, 1977	APOIDEA	Crabronidae	Crabroninae	Crabronini	BIHARGNATHUS			Leclercq, 1977
Acu	393	valid	species	brevis (Vander Linden, 1829, Crabro)	APOIDEA	Crabronidae	Crabroninae	Crabronini	Entomognathus		brevis	(Vander Linden, 1829)		England, Wales	Crabro
Acu	394	invalid	species	apicalis (Lepeletier & Brullé, 1835, Lindenius)	APOIDEA	Crabronidae	Crabroninae	Crabronini	Entomognathus		apicalis	(Lepeletier & Brullé, 1835, Lindenius)
Acu	395	invalid	species	nasutus (Gribodo, 1884, Lindenius)	APOIDEA	Crabronidae	Crabroninae	Crabronini	Entomognathus		nasutus	(Gribodo, 1884, Lindenius)
Acu	397	valid	genus	LESTICA Billberg, 1820	APOIDEA	Crabronidae	Crabroninae	Crabronini	Lestica			Billberg, 1820
Acu	398	valid	subgenus	CLYPEOCRABRO Richards, 1935	APOIDEA	Crabronidae	Crabroninae	Crabronini	Lestica	Clypeocrabro		Richards, 1935
Acu	399	invalid	genus	THYREUS Lepeletier & Brullé, 1835 preocc.	APOIDEA	Crabronidae	Crabroninae	Crabronini	THYREUS			Lepeletier & Brullé, 1835
Acu	400	valid	species	clypeata (Schreber, 1759, Apis)	APOIDEA	Crabronidae	Crabroninae	Crabronini	Lestica		clypeata	(Schreber, 1759)		England	Apis
Acu	401	invalid	species	ovata (Christ, 1791, Sphex)	APOIDEA	Crabronidae	Crabroninae	Crabronini	Lestica		ovata	(Christ, 1791, Sphex)
Acu	402	invalid	species	vexillata (Panzer, 1797, Crabro)	APOIDEA	Crabronidae	Crabroninae	Crabronini	Lestica		vexillata	(Panzer, 1797, Crabro)
Acu	403	invalid	species	lapidaria (Fabricius, 1804, Crabro) preocc.	APOIDEA	Crabronidae	Crabroninae	Crabronini	Lestica		lapidaria	(Fabricius, 1804, Crabro) preocc.
Acu	404	invalid	species	clypeata (Thunberg, 1815, Philanthus)	APOIDEA	Crabronidae	Crabroninae	Crabronini	Lestica		clypeata	(Thunberg, 1815, Philanthus)
Acu	405	invalid	species	nigridens (Herrich-Schäffer, 1841, Crabro)	APOIDEA	Crabronidae	Crabroninae	Crabronini	Lestica		nigridens	(Herrich-Schäffer, 1841, Crabro)
Acu	406	invalid	species	quadrifer (Dufour, 1841, Crabro)	APOIDEA	Crabronidae	Crabroninae	Crabronini	Lestica		quadrifer	(Dufour, 1841, Crabro)
Acu	408	valid	genus	LINDENIUS Lepeletier & Brullé, 1835	APOIDEA	Crabronidae	Crabroninae	Crabronini	Lindenius			Lepeletier & Brullé, 1835
Acu	409	invalid	genus	CHALCOLAMPRUS Wesmael, 1852	APOIDEA	Crabronidae	Crabroninae	Crabronini	CHALCOLAMPRUS			Wesmael, 1852
Acu	410	invalid	genus	TRACHELOSIMUS Morawitz, 1866	APOIDEA	Crabronidae	Crabroninae	Crabronini	TRACHELOSIMUS			Morawitz, 1866
Acu	411	valid	species	albilabris (Fabricius, 1793, Crabro)	APOIDEA	Crabronidae	Crabroninae	Crabronini	Lindenius		albilabris	(Fabricius, 1793)		England, Scotland, Wales	Crabro
Acu	412	invalid	species	aenescens (Dahlbom, 1838, Crabro)	APOIDEA	Crabronidae	Crabroninae	Crabronini	Lindenius		aenescens	(Dahlbom, 1838, Crabro)
Acu	413	valid	species	panzeri (Vander Linden, 1829, Crabro)	APOIDEA	Crabronidae	Crabroninae	Crabronini	Lindenius		panzeri	(Vander Linden, 1829)		England	Crabro
Acu	414	invalid	species	venustus Lepeletier & Brullé, 1835	APOIDEA	Crabronidae	Crabroninae	Crabronini	Lindenius		venustus	Lepeletier & Brullé, 1835
Acu	415	invalid	species	latebrosus (Kohl, 1905, Crabro)	APOIDEA	Crabronidae	Crabroninae	Crabronini	Lindenius		latebrosus	(Kohl, 1905, Crabro)
Acu	416	invalid	species	harbinensis Tsuneki, 1967	APOIDEA	Crabronidae	Crabroninae	Crabronini	Lindenius		harbinensis	Tsuneki, 1967
Acu	417	invalid	species	mongolicus Tsuneki, 1972	APOIDEA	Crabronidae	Crabroninae	Crabronini	Lindenius		mongolicus	Tsuneki, 1972
Acu	418	valid	species	pygmaeus (Rossi, 1794, Crabro)	APOIDEA	Crabronidae	Crabroninae	Crabronini	Lindenius		pygmaeus	(Rossi, 1794)	Represented by the subspecies armatus (Vander Linden, 1829, Crabro).	England	Crabro
Acu	419	invalid	species	curtus Lepeletier & Brullé, 1835	APOIDEA	Crabronidae	Crabroninae	Crabronini	Lindenius		curtus	Lepeletier & Brullé, 1835
Acu	420	invalid	species	kratochvili (Šnoflak, 1948, Crabro)	APOIDEA	Crabronidae	Crabroninae	Crabronini	Lindenius		kratochvili	(Šnoflak, 1948, Crabro)
Acu	422	valid	genus	RHOPALUM Stephens, 1829	APOIDEA	Crabronidae	Crabroninae	Crabronini	Rhopalum			Stephens, 1829
Acu	423	valid	subgenus	RHOPALUM Stephens, 1829	APOIDEA	Crabronidae	Crabroninae	Crabronini	Rhopalum	Rhopalum		Stephens, 1829
Acu	424	invalid	genus	EUPLILIS Risso, 1826 suppressed	APOIDEA	Crabronidae	Crabroninae	Crabronini	EUPLILIS			Risso, 1826
Acu	425	invalid	genus	PHYSOSCELUS Lepeletier & Brullé, 1835	APOIDEA	Crabronidae	Crabroninae	Crabronini	PHYSOSCELUS			Lepeletier & Brullé, 1835
Acu	426	valid	species	clavipes (Linnaeus, 1758, Sphex)	APOIDEA	Crabronidae	Crabroninae	Crabronini	Rhopalum		clavipes	(Linnaeus, 1758)		England, Scotland, Wales, Ireland, Isle of Man	Sphex
Acu	427	invalid	species	rufiventris (Panzer, 1799, Crabro)	APOIDEA	Crabronidae	Crabroninae	Crabronini	Rhopalum		rufiventris	(Panzer, 1799, Crabro)
Acu	429	valid	subgenus	CORYNOPUS Lepeletier & Brullé, 1835	APOIDEA	Crabronidae	Crabroninae	Crabronini	Rhopalum	Corynopus		Lepeletier & Brullé, 1835
Acu	430	invalid	genus	DRYPHUS Herrich-Schäffer, 1840	APOIDEA	Crabronidae	Crabroninae	Crabronini	DRYPHUS			Herrich-Schäffer, 1840
Acu	431	invalid	genus	ALLIOGNATHUS Ashmead, 1899	APOIDEA	Crabronidae	Crabroninae	Crabronini	ALLIOGNATHUS			Ashmead, 1899
Acu	432	valid	species	coarctatum (Scopoli, 1763, Sphex)	APOIDEA	Crabronidae	Crabroninae	Crabronini	Rhopalum		coarctatum	(Scopoli, 1763)		England, Scotland, Wales, Ireland	Sphex	coarctata
Acu	433	invalid	species	crassipes (Fabricius, 1798, Crabro)	APOIDEA	Crabronidae	Crabroninae	Crabronini	Rhopalum		crassipes	(Fabricius, 1798, Crabro)
Acu	434	invalid	species	tibiale (Fabricius, 1798, Crabro) preocc.	APOIDEA	Crabronidae	Crabroninae	Crabronini	Rhopalum		tibiale	(Fabricius, 1798, Crabro) preocc.
Acu	435	invalid	species	modestum Rohwer, 1908	APOIDEA	Crabronidae	Crabroninae	Crabronini	Rhopalum		modestum	Rohwer, 1908
Acu	436	valid	species	gracile Wesmael, 1852	APOIDEA	Crabronidae	Crabroninae	Crabronini	Rhopalum		gracile	Wesmael, 1852		England
Acu	437	invalid	species	nigrinum Kiesenwetter, 1849 preocc.	APOIDEA	Crabronidae	Crabroninae	Crabronini	Rhopalum		nigrinum	Kiesenwetter, 1849 preocc.
Acu	438	invalid	species	kiesenwetteri (Morawitz, 1866, Crabro)	APOIDEA	Crabronidae	Crabroninae	Crabronini	Rhopalum		kiesenwetteri	(Morawitz, 1866, Crabro)
Acu	439	invalid	species	simplicipes (Morawitz, 1888, Corynopus)	APOIDEA	Crabronidae	Crabroninae	Crabronini	Rhopalum		simplicipes	(Morawitz, 1888, Corynopus)
Acu	441	valid	tribe	LARRINI Latreille, 1810	APOIDEA	Crabronidae	Crabroninae	Larrini				Latreille, 1810
Acu	443	valid	genus	TACHYSPHEX Kohl, 1883	APOIDEA	Crabronidae	Crabroninae	Larrini	Tachysphex			Kohl, 1883
Acu	444	invalid	genus	SCHISTOSPHEX Arnold, 1922	APOIDEA	Crabronidae	Crabroninae	Larrini	SCHISTOSPHEX			Arnold, 1922
Acu	445	invalid	genus	ATELOSPHEX Arnold, 1923	APOIDEA	Crabronidae	Crabroninae	Larrini	ATELOSPHEX			Arnold, 1923
Acu	446	valid	species	nitidus (Spinola, 1805, Astata)	APOIDEA	Crabronidae	Crabroninae	Larrini	Tachysphex		nitidus	(Spinola, 1805)	added by Edwards (1998)	England, Wales, Isle of Man	Astata	nitida
Acu	447	invalid	species	unicolor misident.	APOIDEA	Crabronidae	Crabroninae	Larrini	Tachysphex		unicolor	misident.
Acu	448	invalid	species	ibericus (de Saussure, 1867, Tachytes)	APOIDEA	Crabronidae	Crabroninae	Larrini	Tachysphex		ibericus	(de Saussure, 1867, Tachytes)
Acu	449	valid	species	obscuripennis (Schenck, 1857, Tachytes)	APOIDEA	Crabronidae	Crabroninae	Larrini	Tachysphex		obscuripennis	(Schenck, 1857)	Only recorded as a vagrant in Deal, Kent; resident on the Channel Isles, which lie outside of the geographical coverage of this checklist.	England	Tachytes
Acu	450	invalid	species	lativalvis (Thomson, 1870, Tachytes)	APOIDEA	Crabronidae	Crabroninae	Larrini	Tachysphex		lativalvis	(Thomson, 1870, Tachytes)
Acu	451	valid	species	pompiliformis (Panzer, 1805, Larra)	APOIDEA	Crabronidae	Crabroninae	Larrini	Tachysphex		pompiliformis	(Panzer, 1805)		England, Scotland, Wales, Ireland, Isle of Man	Larra
Acu	452	invalid	species	pectinipes misident.	APOIDEA	Crabronidae	Crabroninae	Larrini	Tachysphex		pectinipes	misident.
Acu	453	invalid	species	nigripennis (Spinola, 1808, Tachytes)	APOIDEA	Crabronidae	Crabroninae	Larrini	Tachysphex		nigripennis	(Spinola, 1808, Tachytes)
Acu	454	invalid	species	dimidiata (Panzer, 1809, Larra)	APOIDEA	Crabronidae	Crabroninae	Larrini	Tachysphex		dimidiata	(Panzer, 1809, Larra)
Acu	455	invalid	species	jokischiana (Panzer, 1809, Larra)	APOIDEA	Crabronidae	Crabroninae	Larrini	Tachysphex		jokischiana	(Panzer, 1809, Larra)
Acu	456	invalid	species	parvula (Cresson, 1865, Larrada)	APOIDEA	Crabronidae	Crabroninae	Larrini	Tachysphex		parvula	(Cresson, 1865, Larrada)
Acu	457	invalid	species	quebecensis (Provancher, 1882, Larra)	APOIDEA	Crabronidae	Crabroninae	Larrini	Tachysphex		quebecensis	(Provancher, 1882, Larra)
Acu	458	invalid	species	decorus Fox, 1894	APOIDEA	Crabronidae	Crabroninae	Larrini	Tachysphex		decorus	Fox, 1894
Acu	459	invalid	species	tenuipunctus Fox, 1894	APOIDEA	Crabronidae	Crabroninae	Larrini	Tachysphex		tenuipunctus	Fox, 1894
Acu	460	invalid	species	consimilis Fox, 1894	APOIDEA	Crabronidae	Crabroninae	Larrini	Tachysphex		consimilis	Fox, 1894
Acu	461	invalid	species	rufoniger Bingham, 1897	APOIDEA	Crabronidae	Crabroninae	Larrini	Tachysphex		rufoniger	Bingham, 1897
Acu	462	invalid	species	projectus Nurse, 1903	APOIDEA	Crabronidae	Crabroninae	Larrini	Tachysphex		projectus	Nurse, 1903
Acu	463	invalid	species	argyrotrichus Rohwer, 1911	APOIDEA	Crabronidae	Crabroninae	Larrini	Tachysphex		argyrotrichus	Rohwer, 1911
Acu	464	invalid	species	granulosus Mickel, 1916	APOIDEA	Crabronidae	Crabroninae	Larrini	Tachysphex		granulosus	Mickel, 1916
Acu	465	invalid	species	erythraeus Mickel, 1916	APOIDEA	Crabronidae	Crabroninae	Larrini	Tachysphex		erythraeus	Mickel, 1916
Acu	466	invalid	species	angularis Mickel, 1916	APOIDEA	Crabronidae	Crabroninae	Larrini	Tachysphex		angularis	Mickel, 1916
Acu	467	valid	species	unicolor (Panzer, 1809, Larra)	APOIDEA	Crabronidae	Crabroninae	Larrini	Tachysphex		unicolor	(Panzer, 1809)		England	Larra
Acu	468	invalid	species	nitidus misident.	APOIDEA	Crabronidae	Crabroninae	Larrini	Tachysphex		nitidus	misident.
Acu	469	invalid	species	jurinii (Drapiez, 1819, Larra)	APOIDEA	Crabronidae	Crabroninae	Larrini	Tachysphex		jurinii	(Drapiez, 1819, Larra)
Acu	471	valid	tribe	MISCOPHINI Fox, 1894	APOIDEA	Crabronidae	Crabroninae	Miscophini				Fox, 1894
Acu	473	valid	genus	MISCOPHUS Jurine, 1807	APOIDEA	Crabronidae	Crabroninae	Miscophini	Miscophus			Jurine, 1807
Acu	474	invalid	genus	NITELOPTERUS Ashmead, 1897	APOIDEA	Crabronidae	Crabroninae	Miscophini	NITELOPTERUS			Ashmead, 1897
Acu	475	invalid	genus	HYPOMISCOPHUS Cockerell, 1898	APOIDEA	Crabronidae	Crabroninae	Miscophini	HYPOMISCOPHUS			Cockerell, 1898
Acu	476	invalid	genus	MISCOPHINUS Ashmead, 1898	APOIDEA	Crabronidae	Crabroninae	Miscophini	MISCOPHINUS			Ashmead, 1898
Acu	477	valid	species	ater Lepeletier, 1845	APOIDEA	Crabronidae	Crabroninae	Miscophini	Miscophus		ater	Lepeletier, 1845		England
Acu	478	invalid	species	maritimus Smith, 1858	APOIDEA	Crabronidae	Crabroninae	Miscophini	Miscophus		maritimus	Smith, 1858
Acu	479	valid	species	bicolor Jurine, 1807	APOIDEA	Crabronidae	Crabroninae	Miscophini	Miscophus		bicolor	Jurine, 1807	added by Knowles & Else (2006)	England
Acu	480	invalid	species	dubius (Panzer, 1809, Larra)	APOIDEA	Crabronidae	Crabroninae	Miscophini	Miscophus		dubius	(Panzer, 1809, Larra)
Acu	481	invalid	species	metallicus Verhöff, 1890	APOIDEA	Crabronidae	Crabroninae	Miscophini	Miscophus		metallicus	Verhöff, 1890
Acu	482	invalid	species	tsunekii de Andrade, 1960	APOIDEA	Crabronidae	Crabroninae	Miscophini	Miscophus		tsunekii	de Andrade, 1960
Acu	483	valid	species	concolor Dahlbom, 1844	APOIDEA	Crabronidae	Crabroninae	Miscophini	Miscophus		concolor	Dahlbom, 1844		England
Acu	484	invalid	species	bicolor misident.	APOIDEA	Crabronidae	Crabroninae	Miscophini	Miscophus		bicolor	misident.
Acu	485	invalid	species	moravicus Balthazar, 1957	APOIDEA	Crabronidae	Crabroninae	Miscophini	Miscophus		moravicus	Balthazar, 1957
Acu	487	valid	genus	NITELA Latreille, 1809	APOIDEA	Crabronidae	Crabroninae	Miscophini	Nitela			Latreille, 1809
Acu	488	invalid	genus	TENILA Brèthes, 1913	APOIDEA	Crabronidae	Crabroninae	Miscophini	TENILA			Brèthes, 1913
Acu	489	invalid	genus	RHINONITELA Williams, 1928	APOIDEA	Crabronidae	Crabroninae	Miscophini	RHINONITELA			Williams, 1928
Acu	490	valid	species	borealis Valkeila, 1974	APOIDEA	Crabronidae	Crabroninae	Miscophini	Nitela		borealis	Valkeila, 1974	added by Felton (1987)	England
Acu	491	valid	species	lucens Gayubo & Felton, 2000	APOIDEA	Crabronidae	Crabroninae	Miscophini	Nitela		lucens	Gayubo & Felton, 2000	added by Felton (1987)	England
Acu	492	invalid	species	spinolae misident.	APOIDEA	Crabronidae	Crabroninae	Miscophini	Nitela		spinolae	misident.	Recorded initially as Nitela spinolae Latreille, 1809 (Felton, 1987) but described later as a new species (Gayubo & Felton, 2000).
Acu	494	valid	tribe	OXYBELINI Leach, 1815	APOIDEA	Crabronidae	Crabroninae	Oxybelini				Leach, 1815
Acu	496	valid	genus	OXYBELUS Latreille, 1796	APOIDEA	Crabronidae	Crabroninae	Oxybelini	Oxybelus			Latreille, 1796
Acu	497	invalid	genus	NOTOGLOSSA Dahlbom, 1845	APOIDEA	Crabronidae	Crabroninae	Oxybelini	NOTOGLOSSA			Dahlbom, 1845
Acu	498	invalid	genus	ALEPIDASPIS Costa, 1882	APOIDEA	Crabronidae	Crabroninae	Oxybelini	ALEPIDASPIS			Costa, 1882
Acu	499	invalid	genus	ANOXYBELUS Kohl, 1924	APOIDEA	Crabronidae	Crabroninae	Oxybelini	ANOXYBELUS			Kohl, 1924
Acu	500	invalid	genus	GONIOXYBELUS Pate, 1937	APOIDEA	Crabronidae	Crabroninae	Oxybelini	GONIOXYBELUS			Pate, 1937
Acu	501	invalid	genus	ORTHOXYBELUS Pate, 1937	APOIDEA	Crabronidae	Crabroninae	Oxybelini	ORTHOXYBELUS			Pate, 1937
Acu	502	invalid	genus	LATROXYBELUS Noskiewicz & Chudoba, 1950	APOIDEA	Crabronidae	Crabroninae	Oxybelini	LATROXYBELUS			Noskiewicz & Chudoba, 1950
Acu	503	valid	species	argentatus Curtis, 1833	APOIDEA	Crabronidae	Crabroninae	Oxybelini	Oxybelus		argentatus	Curtis, 1833		England, Wales
Acu	504	invalid	species	mucronatus misident.	APOIDEA	Crabronidae	Crabroninae	Oxybelini	Oxybelus		mucronatus	misident.
Acu	505	invalid	species	?decimmaculata (Donovan, 1806, Vespa)	APOIDEA	Crabronidae	Crabroninae	Oxybelini	Oxybelus		?decimmaculata	(Donovan, 1806, Vespa)
Acu	506	invalid	species	ferox Shuckard, 1837	APOIDEA	Crabronidae	Crabroninae	Oxybelini	Oxybelus		ferox	Shuckard, 1837
Acu	507	invalid	species	nigricornis Shuckard, 1837	APOIDEA	Crabronidae	Crabroninae	Oxybelini	Oxybelus		nigricornis	Shuckard, 1837
Acu	508	valid	species	mandibularis Dahlbom, 1845	APOIDEA	Crabronidae	Crabroninae	Oxybelini	Oxybelus		mandibularis	Dahlbom, 1845		England, Scotland, Wales, Isle of Man
Acu	509	invalid	species	sericatus Gerstäcker, 1867	APOIDEA	Crabronidae	Crabroninae	Oxybelini	Oxybelus		sericatus	Gerstäcker, 1867
Acu	510	valid	species	uniglumis (Linnaeus, 1758, Vespa)	APOIDEA	Crabronidae	Crabroninae	Oxybelini	Oxybelus		uniglumis	(Linnaeus, 1758)		England, Scotland, Wales, Ireland, Isle of Man	Vespa
Acu	511	invalid	species	punctata (Fabricius, 1793, Nomada)	APOIDEA	Crabronidae	Crabroninae	Oxybelini	Oxybelus		punctata	(Fabricius, 1793, Nomada)
Acu	512	invalid	species	tridens (Fabricius, 1798, Crabro)	APOIDEA	Crabronidae	Crabroninae	Oxybelini	Oxybelus		tridens	(Fabricius, 1798, Crabro)
Acu	513	invalid	species	?decimmaculata (Donovan, 1806, Vespa)	APOIDEA	Crabronidae	Crabroninae	Oxybelini	Oxybelus		?decimmaculata	(Donovan, 1806, Vespa)
Acu	514	invalid	species	pygmaeus Olivier, 1812	APOIDEA	Crabronidae	Crabroninae	Oxybelini	Oxybelus		pygmaeus	Olivier, 1812
Acu	515	invalid	species	quadrinotatus Say, 1824	APOIDEA	Crabronidae	Crabroninae	Oxybelini	Oxybelus		quadrinotatus	Say, 1824
Acu	516	invalid	species	impatiens Smith, 1856	APOIDEA	Crabronidae	Crabroninae	Oxybelini	Oxybelus		impatiens	Smith, 1856
Acu	517	invalid	species	interruptus Cresson, 1865	APOIDEA	Crabronidae	Crabroninae	Oxybelini	Oxybelus		interruptus	Cresson, 1865
Acu	518	invalid	species	fallax Gerstäcker, 1867	APOIDEA	Crabronidae	Crabroninae	Oxybelini	Oxybelus		fallax	Gerstäcker, 1867
Acu	519	invalid	species	brodiei Provancher, 1883	APOIDEA	Crabronidae	Crabroninae	Oxybelini	Oxybelus		brodiei	Provancher, 1883
Acu	520	invalid	species	hispanicus Giner Marí, 1943	APOIDEA	Crabronidae	Crabroninae	Oxybelini	Oxybelus		hispanicus	Giner Marí, 1943
Acu	522	valid	tribe	TRYPOXYLINI Lepeletier, 1845	APOIDEA	Crabronidae	Crabroninae	Trypoxylini				Lepeletier, 1845
Acu	524	valid	genus	TRYPOXYLON Latreille, 1796	APOIDEA	Crabronidae	Crabroninae	Trypoxylini	Trypoxylon			Latreille, 1796
Acu	525	invalid	genus	APIUS Panzer, 1806	APOIDEA	Crabronidae	Crabroninae	Trypoxylini	APIUS			Panzer, 1806
Acu	526	invalid	genus	APIUS Jurine, 1807 preocc.	APOIDEA	Crabronidae	Crabroninae	Trypoxylini	APIUS			Jurine, 1807
Acu	527	invalid	genus	TRYPARGILUM Richards, 1934	APOIDEA	Crabronidae	Crabroninae	Trypoxylini	TRYPARGILUM			Richards, 1934
Acu	528	invalid	genus	ASACONOTON Arnold, 1959	APOIDEA	Crabronidae	Crabroninae	Trypoxylini	ASACONOTON			Arnold, 1959
Acu	529	valid	species	attenuatum Smith, 1851	APOIDEA	Crabronidae	Crabroninae	Trypoxylini	Trypoxylon		attenuatum	Smith, 1851		England, Scotland, Wales, Ireland
Acu	530	valid	species	clavicerum Lepeletier & Serville, 1828	APOIDEA	Crabronidae	Crabroninae	Trypoxylini	Trypoxylon		clavicerum	Lepeletier & Serville, 1828		England, Wales, Ireland
Acu	531	invalid	species	tibiale Zetterstedt, 1840	APOIDEA	Crabronidae	Crabroninae	Trypoxylini	Trypoxylon		tibiale	Zetterstedt, 1840
Acu	532	invalid	species	batumicum Antropov, 1985	APOIDEA	Crabronidae	Crabroninae	Trypoxylini	Trypoxylon		batumicum	Antropov, 1985
Acu	533	valid	species	figulus (Linnaeus, 1758, Sphex)	APOIDEA	Crabronidae	Crabroninae	Trypoxylini	Trypoxylon		figulus	(Linnaeus, 1758)		England, Wales	Sphex
Acu	534	invalid	species	fuliginosa (Scopoli, 1763, Sphex)	APOIDEA	Crabronidae	Crabroninae	Trypoxylini	Trypoxylon		fuliginosa	(Scopoli, 1763, Sphex)
Acu	535	invalid	species	apicale Fox, 1891	APOIDEA	Crabronidae	Crabroninae	Trypoxylini	Trypoxylon		apicale	Fox, 1891
Acu	536	invalid	species	yezo Tsuneki, 1956	APOIDEA	Crabronidae	Crabroninae	Trypoxylini	Trypoxylon		yezo	Tsuneki, 1956
Acu	537	invalid	species	barbarum de Beaumont, 1957	APOIDEA	Crabronidae	Crabroninae	Trypoxylini	Trypoxylon		barbarum	de Beaumont, 1957
Acu	538	invalid	species	fieuzeti Giner Marí, 1959	APOIDEA	Crabronidae	Crabroninae	Trypoxylini	Trypoxylon		fieuzeti	Giner Marí, 1959
Acu	539	valid	species	medium de Beaumont, 1945	APOIDEA	Crabronidae	Crabroninae	Trypoxylini	Trypoxylon		medium	de Beaumont, 1945	added by Pulawski (1984)	England, Scotland, Wales
Acu	540	valid	species	minus de Beaumont, 1945	APOIDEA	Crabronidae	Crabroninae	Trypoxylini	Trypoxylon		minus	de Beaumont, 1945	added by Felton (1988)	England
Acu	541	invalid	species	koma Tsuneki, 1956	APOIDEA	Crabronidae	Crabroninae	Trypoxylini	Trypoxylon		koma	Tsuneki, 1956
Acu	543	valid	Subfamily	DINETINAE Fox, 1895	APOIDEA	Crabronidae	Dinetinae					Fox, 1895
Acu	545	valid	genus	DINETUS Panzer, 1806	APOIDEA	Crabronidae	DINETINAE		Dinetus			Panzer, 1806
Acu	546	invalid	genus	DINETUS Jurine, 1807 preocc.	APOIDEA	Crabronidae	DINETINAE		DINETUS			Jurine, 1807
Acu	547	valid	species	pictus (Fabricius, 1793, Crabro)	APOIDEA	Crabronidae	DINETINAE		Dinetus		pictus	(Fabricius, 1793)		England	Crabro
Acu	548	invalid	species	guttatus (Fabricius, 1793, Sphex) preocc.	APOIDEA	Crabronidae	DINETINAE		Dinetus		guttatus	(Fabricius, 1793, Sphex) preocc.
Acu	550	valid	Subfamily	Mellininae Latreille, 1802	APOIDEA	Crabronidae	Mellininae					Latreille, 1802
Acu	552	valid	genus	MELLINUS Fabricius, 1790	APOIDEA	Crabronidae	Mellininae		Mellinus			Fabricius, 1790
Acu	553	valid	species	arvensis (Linnaeus, 1758, Vespa)	APOIDEA	Crabronidae	Mellininae		Mellinus		arvensis	(Linnaeus, 1758)		England, Scotland, Wales, Ireland, Isle of Man	Vespa
Acu	554	invalid	species	vagus (Linnaeus, 1758, Sphex)	APOIDEA	Crabronidae	Mellininae		Mellinus		vagus	(Linnaeus, 1758, Sphex)
Acu	555	invalid	species	superbus (Harris, 1776, Vespa)	APOIDEA	Crabronidae	Mellininae		Mellinus		superbus	(Harris, 1776, Vespa)
Acu	556	invalid	species	tricinctus (Schrank, 1781, Vespa)	APOIDEA	Crabronidae	Mellininae		Mellinus		tricinctus	(Schrank, 1781, Vespa)
Acu	557	invalid	species	clavatus (Retzius, 1783, Sphex)	APOIDEA	Crabronidae	Mellininae		Mellinus		clavatus	(Retzius, 1783, Sphex)
Acu	558	invalid	species	?infundibuliformis (Geoffroy, 1785, Vespa)	APOIDEA	Crabronidae	Mellininae		Mellinus		?infundibuliformis	(Geoffroy, 1785, Vespa)
Acu	559	invalid	species	?petiolatus (Geoffroy, 1785, Vespa)	APOIDEA	Crabronidae	Mellininae		Mellinus		?petiolatus	(Geoffroy, 1785, Vespa)
Acu	560	invalid	species	bipunctatus (Fabricius, 1787, Crabro)	APOIDEA	Crabronidae	Mellininae		Mellinus		bipunctatus	(Fabricius, 1787, Crabro)
Acu	561	invalid	species	?gibbus (Villers, 1789, Sphex) preocc.	APOIDEA	Crabronidae	Mellininae		Mellinus		?gibbus	(Villers, 1789, Sphex) preocc.
Acu	562	invalid	species	melanostictus (Gmelin, 1790, Vespa)	APOIDEA	Crabronidae	Mellininae		Mellinus		melanostictus	(Gmelin, 1790, Vespa)
Acu	563	invalid	species	?arthriticus (Rossi, 1790, Crabro)	APOIDEA	Crabronidae	Mellininae		Mellinus		?arthriticus	(Rossi, 1790, Crabro)
Acu	564	invalid	species	?rachiticus (Rossi, 1790, Crabro)	APOIDEA	Crabronidae	Mellininae		Mellinus		?rachiticus	(Rossi, 1790, Crabro)
Acu	565	invalid	species	annularis (Christ, 1791, Sphex)	APOIDEA	Crabronidae	Mellininae		Mellinus		annularis	(Christ, 1791, Sphex)
Acu	566	invalid	species	succinctus (Olivier, 1792, Vespa)	APOIDEA	Crabronidae	Mellininae		Mellinus		succinctus	(Olivier, 1792, Vespa)
Acu	567	invalid	species	diversus (Olivier, 1792, Vespa)	APOIDEA	Crabronidae	Mellininae		Mellinus		diversus	(Olivier, 1792, Vespa)
Acu	568	invalid	species	labiatus (Olivier, 1792, Crabro)	APOIDEA	Crabronidae	Mellininae		Mellinus		labiatus	(Olivier, 1792, Crabro)
Acu	569	invalid	species	quinquemaculatus (Fabricius, 1793, Philanthus)	APOIDEA	Crabronidae	Mellininae		Mellinus		quinquemaculatus	(Fabricius, 1793, Philanthus)
Acu	570	invalid	species	u-flavum (Panzer, 1794, Crabro)	APOIDEA	Crabronidae	Mellininae		Mellinus		u-flavum	(Panzer, 1794, Crabro)
Acu	571	invalid	species	capistratus (Schrank, 1796, Crabro)	APOIDEA	Crabronidae	Mellininae		Mellinus		capistratus	(Schrank, 1796, Crabro)
Acu	572	invalid	species	pratensis Jurine, 1807	APOIDEA	Crabronidae	Mellininae		Mellinus		pratensis	Jurine, 1807
Acu	573	invalid	species	compactus Handlirsch, 1888	APOIDEA	Crabronidae	Mellininae		Mellinus		compactus	Handlirsch, 1888
Acu	574	valid	species	crabroneus (Thunberg, 1791, Sphex)	APOIDEA	Crabronidae	Mellininae		Mellinus		crabroneus	(Thunberg, 1791)		England, Wales	Sphex	crabronea
Acu	575	invalid	species	sabulosus (Fabricius, 1787, Crabro) preocc.	APOIDEA	Crabronidae	Mellininae		Mellinus		sabulosus	(Fabricius, 1787, Crabro) preocc.
Acu	576	invalid	species	ruficornis (Villers, 1789, Sphex) preocc.	APOIDEA	Crabronidae	Mellininae		Mellinus		ruficornis	(Villers, 1789, Sphex) preocc.
Acu	577	invalid	species	sabulosus (Olivier, 1792, Crabro) preocc.	APOIDEA	Crabronidae	Mellininae		Mellinus		sabulosus	(Olivier, 1792, Crabro) preocc.
Acu	578	invalid	species	ruficornis Fabricius, 1793 preocc.	APOIDEA	Crabronidae	Mellininae		Mellinus		ruficornis	Fabricius, 1793 preocc.
Acu	579	invalid	species	frontalis (Panzer, 1797, Crabro)	APOIDEA	Crabronidae	Mellininae		Mellinus		frontalis	(Panzer, 1797, Crabro)
Acu	580	invalid	species	petiolatus (Panzer, 1797, Crabro)	APOIDEA	Crabronidae	Mellininae		Mellinus		petiolatus	(Panzer, 1797, Crabro)
Acu	581	invalid	species	fulvicornis Fabricius, 1804	APOIDEA	Crabronidae	Mellininae		Mellinus		fulvicornis	Fabricius, 1804
Acu	583	valid	Subfamily	Pemphredoninae Dahlbom, 1835	APOIDEA	Crabronidae	Pemphredoninae					Dahlbom, 1835
Acu	585	valid	tribe	PemphredoninI Dahlbom, 1835	APOIDEA	Crabronidae	Pemphredoninae	Pemphredonini				Dahlbom, 1835
Acu	587	valid	genus	DIODONTUS Curtis, 1834	APOIDEA	Crabronidae	Pemphredoninae	Pemphredonini	Diodontus			Curtis, 1834
Acu	588	invalid	genus	XYLOCELIA Rohwer, 1915	APOIDEA	Crabronidae	Pemphredoninae	Pemphredonini	XYLOCELIA			Rohwer, 1915
Acu	589	invalid	genus	NEODIODONTUS Tsuneki, 1972	APOIDEA	Crabronidae	Pemphredoninae	Pemphredonini	NEODIODONTUS			Tsuneki, 1972
Acu	590	invalid	genus	CORENIUS Tsuneki, 1974	APOIDEA	Crabronidae	Pemphredoninae	Pemphredonini	CORENIUS			Tsuneki, 1974
Acu	591	valid	species	insidiosus Spooner, 1938	APOIDEA	Crabronidae	Pemphredoninae	Pemphredonini	Diodontus		insidiosus	Spooner, 1938		England
Acu	592	invalid	species	friesei misident.	APOIDEA	Crabronidae	Pemphredoninae	Pemphredonini	Diodontus		friesei	misident.
Acu	593	valid	species	luperus Shuckard, 1837	APOIDEA	Crabronidae	Pemphredoninae	Pemphredonini	Diodontus		luperus	Shuckard, 1837		England, Wales
Acu	594	valid	species	minutus (Fabricius, 1793, Crabro)	APOIDEA	Crabronidae	Pemphredoninae	Pemphredonini	Diodontus		minutus	(Fabricius, 1793)		England, Wales, Isle of Man	Crabro
Acu	595	invalid	species	franclemonti Krombein, 1939	APOIDEA	Crabronidae	Pemphredoninae	Pemphredonini	Diodontus		franclemonti	Krombein, 1939
Acu	596	valid	species	tristis (Vander Linden, 1829, Pemphredon)	APOIDEA	Crabronidae	Pemphredoninae	Pemphredonini	Diodontus		tristis	(Vander Linden, 1829)		England, Scotland, Wales	Pemphredon
Acu	598	valid	genus	PASSALOECUS Shuckard, 1837	APOIDEA	Crabronidae	Pemphredoninae	Pemphredonini	Passaloecus			Shuckard, 1837
Acu	599	invalid	genus	XYLOECUS Shuckard, 1837	APOIDEA	Crabronidae	Pemphredoninae	Pemphredonini	XYLOECUS			Shuckard, 1837
Acu	600	invalid	genus	COELOECUS Verhöff, 1890	APOIDEA	Crabronidae	Pemphredoninae	Pemphredonini	COELOECUS			Verhöff, 1890
Acu	601	invalid	genus	HEROECUS Verhöff, 1890	APOIDEA	Crabronidae	Pemphredoninae	Pemphredonini	HEROECUS			Verhöff, 1890
Acu	602	valid	species	clypealis Faester, 1947	APOIDEA	Crabronidae	Pemphredoninae	Pemphredonini	Passaloecus		clypealis	Faester, 1947		England
Acu	603	invalid	species	angustus Gussakovskij, 1952	APOIDEA	Crabronidae	Pemphredoninae	Pemphredonini	Passaloecus		angustus	Gussakovskij, 1952
Acu	604	valid	species	corniger Shuckard, 1837	APOIDEA	Crabronidae	Pemphredoninae	Pemphredonini	Passaloecus		corniger	Shuckard, 1837		England, Wales
Acu	605	valid	species	eremita Kohl, 1893	APOIDEA	Crabronidae	Pemphredoninae	Pemphredonini	Passaloecus		eremita	Kohl, 1893	added by Richards (1980)	England
Acu	606	valid	species	gracilis (Curtis, 1834, Diodontus)	APOIDEA	Crabronidae	Pemphredoninae	Pemphredonini	Passaloecus		gracilis	(Curtis, 1834)		England	Diodontus
Acu	607	invalid	species	insignis misident.	APOIDEA	Crabronidae	Pemphredoninae	Pemphredonini	Passaloecus		insignis	misident.
Acu	608	invalid	species	turionum misident.	APOIDEA	Crabronidae	Pemphredoninae	Pemphredonini	Passaloecus		turionum	misident.
Acu	609	invalid	species	brevicornis Morawitz, 1864	APOIDEA	Crabronidae	Pemphredoninae	Pemphredonini	Passaloecus		brevicornis	Morawitz, 1864
Acu	610	valid	species	insignis (Vander Linden, 1829, Pemphredon)	APOIDEA	Crabronidae	Pemphredoninae	Pemphredonini	Passaloecus		insignis	(Vander Linden, 1829)		England, Wales	Pemphredon
Acu	611	invalid	species	roettgeni Verhöff, 1890	APOIDEA	Crabronidae	Pemphredoninae	Pemphredonini	Passaloecus		roettgeni	Verhöff, 1890
Acu	612	invalid	species	shuckardi Yasumatsu, 1934	APOIDEA	Crabronidae	Pemphredoninae	Pemphredonini	Passaloecus		shuckardi	Yasumatsu, 1934
Acu	613	valid	species	monilicornis Dahlbom, 1842	APOIDEA	Crabronidae	Pemphredoninae	Pemphredonini	Passaloecus		monilicornis	Dahlbom, 1842		England, Scotland, Wales, Ireland
Acu	614	valid	species	singularis Dahlbom, 1844	APOIDEA	Crabronidae	Pemphredoninae	Pemphredonini	Passaloecus		singularis	Dahlbom, 1844		England, Wales
Acu	615	invalid	species	gracilis misident.	APOIDEA	Crabronidae	Pemphredoninae	Pemphredonini	Passaloecus		gracilis	misident.
Acu	616	invalid	species	tenuis Morawitz, 1864	APOIDEA	Crabronidae	Pemphredoninae	Pemphredonini	Passaloecus		tenuis	Morawitz, 1864
Acu	617	invalid	species	gertrudis Krombein, 1938	APOIDEA	Crabronidae	Pemphredoninae	Pemphredonini	Passaloecus		gertrudis	Krombein, 1938
Acu	618	valid	species	turionum Dahlbom, 1844	APOIDEA	Crabronidae	Pemphredoninae	Pemphredonini	Passaloecus		turionum	Dahlbom, 1844	added by Guichard (2002)	England
Acu	620	valid	genus	PEMPHREDON Latreille, 1796	APOIDEA	Crabronidae	Pemphredoninae	Pemphredonini	Pemphredon			Latreille, 1796	Taxonomy follows Dollfuss (1995).
Acu	621	invalid	genus	CEMONUS Panzer, 1806	APOIDEA	Crabronidae	Pemphredoninae	Pemphredonini	CEMONUS			Panzer, 1806
Acu	622	invalid	genus	DINEURUS Westwood, 1837	APOIDEA	Crabronidae	Pemphredoninae	Pemphredonini	DINEURUS			Westwood, 1837
Acu	623	invalid	genus	CERATOPHORUS Shuckard, 1837	APOIDEA	Crabronidae	Pemphredoninae	Pemphredonini	CERATOPHORUS			Shuckard, 1837
Acu	624	invalid	genus	DIPHLEBUS Westwood, 1840	APOIDEA	Crabronidae	Pemphredoninae	Pemphredonini	DIPHLEBUS			Westwood, 1840
Acu	625	invalid	genus	CHEVRIERIA Kohl, 1883	APOIDEA	Crabronidae	Pemphredoninae	Pemphredonini	CHEVRIERIA			Kohl, 1883
Acu	626	invalid	genus	SUSANOWO Tsuneki, 1972	APOIDEA	Crabronidae	Pemphredoninae	Pemphredonini	SUSANOWO			Tsuneki, 1972
Acu	627	valid	species	austriaca (Kohl, 1888, Diphlebus)	APOIDEA	Crabronidae	Pemphredoninae	Pemphredonini	Pemphredon		austriaca	(Kohl, 1888)		England	Diphlebus	austriacus
Acu	628	invalid	species	enslini misident.	APOIDEA	Crabronidae	Pemphredoninae	Pemphredonini	Pemphredon		enslini	misident.	Richards (1980) refers to this species as Pemphredon enslini (Wagner, 1932, Dineurus). There has been much confusion over the identities of these taxa (see Knowles in Collins & Roy, 2012) but Pulawski (2013) treats austriaca and enslini as separate species.
Acu	629	invalid	species	coracina Valkeila, 1972	APOIDEA	Crabronidae	Pemphredoninae	Pemphredonini	Pemphredon		coracina	Valkeila, 1972
Acu	630	invalid	species	tener Valkeila, 1972	APOIDEA	Crabronidae	Pemphredoninae	Pemphredonini	Pemphredon		tener	Valkeila, 1972
Acu	631	invalid	species	nescia Merisuo, 1972	APOIDEA	Crabronidae	Pemphredoninae	Pemphredonini	Pemphredon		nescia	Merisuo, 1972
Acu	632	valid	species	inornata Say, 1824	APOIDEA	Crabronidae	Pemphredoninae	Pemphredonini	Pemphredon		inornata	Say, 1824		England, Scotland, Wales, Ireland
Acu	633	invalid	species	shuckardi (Morawitz, 1864, Cemonus)	APOIDEA	Crabronidae	Pemphredoninae	Pemphredonini	Pemphredon		shuckardi	(Morawitz, 1864, Cemonus)
Acu	634	invalid	species	dentata (Puton, 1871, Cemonus)	APOIDEA	Crabronidae	Pemphredoninae	Pemphredonini	Pemphredon		dentata	(Puton, 1871, Cemonus)
Acu	635	invalid	species	tenax Fox, 1829	APOIDEA	Crabronidae	Pemphredoninae	Pemphredonini	Pemphredon		tenax	Fox, 1829
Acu	636	valid	species	lethifer (Shuckard, 1837, Cemonus)	APOIDEA	Crabronidae	Pemphredoninae	Pemphredonini	Pemphredon		lethifer	(Shuckard, 1837)		England, Scotland, Wales, Ireland, Isle of Man	Cemonus
Acu	637	invalid	species	lethifera misspelling	APOIDEA	Crabronidae	Pemphredoninae	Pemphredonini	Pemphredon		lethifera	misspelling
Acu	638	invalid	species	austriaca misident.	APOIDEA	Crabronidae	Pemphredoninae	Pemphredonini	Pemphredon		austriaca	misident.
Acu	639	invalid	species	strigatus (Chevrier, 1870, Cemonus)	APOIDEA	Crabronidae	Pemphredoninae	Pemphredonini	Pemphredon		strigatus	(Chevrier, 1870, Cemonus)
Acu	640	invalid	species	fabricii (Müller, 1911, Cemonus)	APOIDEA	Crabronidae	Pemphredoninae	Pemphredonini	Pemphredon		fabricii	(Müller, 1911, Cemonus)
Acu	641	invalid	species	fuscatus (Wagner, 1918, Diphlebus)	APOIDEA	Crabronidae	Pemphredoninae	Pemphredonini	Pemphredon		fuscatus	(Wagner, 1918, Diphlebus)
Acu	642	invalid	species	littoralis (Wagner, 1918, Diphlebus)	APOIDEA	Crabronidae	Pemphredoninae	Pemphredonini	Pemphredon		littoralis	(Wagner, 1918, Diphlebus)
Acu	643	invalid	species	neglectus (Wagner, 1918, Diphlebus)	APOIDEA	Crabronidae	Pemphredoninae	Pemphredonini	Pemphredon		neglectus	(Wagner, 1918, Diphlebus)
Acu	644	invalid	species	minutus (Wagner, 1918, Diphlebus)	APOIDEA	Crabronidae	Pemphredoninae	Pemphredonini	Pemphredon		minutus	(Wagner, 1918, Diphlebus)
Acu	645	invalid	species	enslini Wagner, 1931	APOIDEA	Crabronidae	Pemphredoninae	Pemphredonini	Pemphredon		enslini	Wagner, 1931
Acu	646	invalid	species	brevipetiolata Wagner, 1932	APOIDEA	Crabronidae	Pemphredoninae	Pemphredonini	Pemphredon		brevipetiolata	Wagner, 1932
Acu	647	invalid	species	platyura Gussakovskij, 1952	APOIDEA	Crabronidae	Pemphredoninae	Pemphredonini	Pemphredon		platyura	Gussakovskij, 1952
Acu	648	invalid	species	minor Gussakovskij, 1952	APOIDEA	Crabronidae	Pemphredoninae	Pemphredonini	Pemphredon		minor	Gussakovskij, 1952
Acu	649	invalid	species	levinota Merisuo, 1972	APOIDEA	Crabronidae	Pemphredoninae	Pemphredonini	Pemphredon		levinota	Merisuo, 1972
Acu	650	invalid	species	nannophyes Merisuo, 1972	APOIDEA	Crabronidae	Pemphredoninae	Pemphredonini	Pemphredon		nannophyes	Merisuo, 1972
Acu	651	invalid	species	dispar Valkeila, 1972	APOIDEA	Crabronidae	Pemphredoninae	Pemphredonini	Pemphredon		dispar	Valkeila, 1972
Acu	652	invalid	species	gemina Valkeila, 1972	APOIDEA	Crabronidae	Pemphredoninae	Pemphredonini	Pemphredon		gemina	Valkeila, 1972
Acu	653	invalid	species	trichogastor Valkeila, 1972	APOIDEA	Crabronidae	Pemphredoninae	Pemphredonini	Pemphredon		trichogastor	Valkeila, 1972
Acu	654	invalid	species	?sudaorum Tsuneki, 1977	APOIDEA	Crabronidae	Pemphredoninae	Pemphredonini	Pemphredon		?sudaorum	Tsuneki, 1977
Acu	655	valid	species	lugubris (Fabricius, 1793, Crabro)	APOIDEA	Crabronidae	Pemphredoninae	Pemphredonini	Pemphredon		lugubris	(Fabricius, 1793)		England, Scotland, Wales, Ireland, Isle of Man	Crabro
Acu	656	invalid	species	concolor Say, 1824	APOIDEA	Crabronidae	Pemphredoninae	Pemphredonini	Pemphredon		concolor	Say, 1824
Acu	657	invalid	species	ocellaris Gimmerthal, 1836	APOIDEA	Crabronidae	Pemphredoninae	Pemphredonini	Pemphredon		ocellaris	Gimmerthal, 1836
Acu	658	invalid	species	luctuosa Shuckard, 1837	APOIDEA	Crabronidae	Pemphredoninae	Pemphredonini	Pemphredon		luctuosa	Shuckard, 1837
Acu	659	invalid	species	morio Cresson, 1865 preocc.	APOIDEA	Crabronidae	Pemphredoninae	Pemphredonini	Pemphredon		morio	Cresson, 1865 preocc.
Acu	660	invalid	species	cressoni Dalla Torre, 1897	APOIDEA	Crabronidae	Pemphredoninae	Pemphredonini	Pemphredon		cressoni	Dalla Torre, 1897
Acu	661	invalid	species	provancheri Dalla Torre, 1897	APOIDEA	Crabronidae	Pemphredoninae	Pemphredonini	Pemphredon		provancheri	Dalla Torre, 1897
Acu	662	invalid	species	tinctipennis Cameron, 1908	APOIDEA	Crabronidae	Pemphredoninae	Pemphredonini	Pemphredon		tinctipennis	Cameron, 1908
Acu	663	invalid	species	shawii Rohwer, 1917	APOIDEA	Crabronidae	Pemphredoninae	Pemphredonini	Pemphredon		shawii	Rohwer, 1917
Acu	664	invalid	species	pacifica Gussakovkij, 1932	APOIDEA	Crabronidae	Pemphredoninae	Pemphredonini	Pemphredon		pacifica	Gussakovkij, 1932
Acu	665	valid	species	morio Vander Linden, 1829	APOIDEA	Crabronidae	Pemphredoninae	Pemphredonini	Pemphredon		morio	Vander Linden, 1829		England, Wales
Acu	666	invalid	species	anthracinus (Smith, 1851, Ceratophorus)	APOIDEA	Crabronidae	Pemphredoninae	Pemphredonini	Pemphredon		anthracinus	(Smith, 1851, Ceratophorus)
Acu	667	invalid	species	carinata Thomson, 1870	APOIDEA	Crabronidae	Pemphredoninae	Pemphredonini	Pemphredon		carinata	Thomson, 1870
Acu	668	invalid	species	clypealis Thomson, 1870	APOIDEA	Crabronidae	Pemphredoninae	Pemphredonini	Pemphredon		clypealis	Thomson, 1870
Acu	669	invalid	species	intermedia Tsuneki, 1951	APOIDEA	Crabronidae	Pemphredoninae	Pemphredonini	Pemphredon		intermedia	Tsuneki, 1951
Acu	670	valid	species	rugifer (Dahlbom, 1844, Cemonus)	APOIDEA	Crabronidae	Pemphredoninae	Pemphredonini	Pemphredon		rugifer	(Dahlbom, 1844)		England, Scotland	Cemonus
Acu	671	invalid	species	rugifera misspelling	APOIDEA	Crabronidae	Pemphredoninae	Pemphredonini	Pemphredon		rugifera	misspelling
Acu	672	invalid	species	unicolor (Panzer, 1798, Sphex) preocc.	APOIDEA	Crabronidae	Pemphredoninae	Pemphredonini	Pemphredon		unicolor	(Panzer, 1798, Sphex) preocc.
Acu	673	invalid	species	pilosa (Gimmerthal, 1836, Cemonus)	APOIDEA	Crabronidae	Pemphredoninae	Pemphredonini	Pemphredon		pilosa	(Gimmerthal, 1836, Cemonus)
Acu	674	invalid	species	wesmaeli (Morawitz, 1864, Cemonus)	APOIDEA	Crabronidae	Pemphredoninae	Pemphredonini	Pemphredon		wesmaeli	(Morawitz, 1864, Cemonus)
Acu	675	invalid	species	scotica Perkins, 1929	APOIDEA	Crabronidae	Pemphredoninae	Pemphredonini	Pemphredon		scotica	Perkins, 1929
Acu	676	invalid	species	solivaga (Bondroit, 1931, Cemonus)	APOIDEA	Crabronidae	Pemphredoninae	Pemphredonini	Pemphredon		solivaga	(Bondroit, 1931, Cemonus)
Acu	677	invalid	species	bucharicus Gussakovskij, 1952	APOIDEA	Crabronidae	Pemphredoninae	Pemphredonini	Pemphredon		bucharicus	Gussakovskij, 1952
Acu	678	invalid	species	mortifer Valkeila, 1972	APOIDEA	Crabronidae	Pemphredoninae	Pemphredonini	Pemphredon		mortifer	Valkeila, 1972
Acu	679	invalid	species	punctifer Valkeila, 1972	APOIDEA	Crabronidae	Pemphredoninae	Pemphredonini	Pemphredon		punctifer	Valkeila, 1972
Acu	680	invalid	species	scytica Valkeila, 1972	APOIDEA	Crabronidae	Pemphredoninae	Pemphredonini	Pemphredon		scytica	Valkeila, 1972
Acu	682	valid	genus	SPILOMENA Shuckard, 1838	APOIDEA	Crabronidae	Pemphredoninae	Pemphredonini	Spilomena			Shuckard, 1838
Acu	683	invalid	genus	CELIA Shuckard, 1837 preocc.	APOIDEA	Crabronidae	Pemphredoninae	Pemphredonini	CELIA			Shuckard, 1837
Acu	684	invalid	genus	MICROGLOSSA Rayment, 1930 preocc.	APOIDEA	Crabronidae	Pemphredoninae	Pemphredonini	MICROGLOSSA			Rayment, 1930
Acu	685	invalid	genus	MICROGLOSSELLA Rayment, 1935	APOIDEA	Crabronidae	Pemphredoninae	Pemphredonini	MICROGLOSSELLA			Rayment, 1935
Acu	686	invalid	genus	TAIALIA Tsuneki, 1971	APOIDEA	Crabronidae	Pemphredoninae	Pemphredonini	TAIALIA			Tsuneki, 1971
Acu	687	valid	species	beata Blüthgen, 1953	APOIDEA	Crabronidae	Pemphredoninae	Pemphredonini	Spilomena		beata	Blüthgen, 1953		England
Acu	688	invalid	species	exspectata Valkeila, 1957	APOIDEA	Crabronidae	Pemphredoninae	Pemphredonini	Spilomena		exspectata	Valkeila, 1957
Acu	689	valid	species	differens Blüthgen, 1953	APOIDEA	Crabronidae	Pemphredoninae	Pemphredonini	Spilomena		differens	Blüthgen, 1953	Has been called curruca (Dahlbom, 1844, Celia) in several publications, following Dollfuss’s (1986) synonymy, but was reinstated as a valid species by Vikberg (2000).	England
		invalid	species	pulawskii Dolfuss, 1983	APOIDEA	Crabronidae	Pemphredoninae	Pemphredonini	Spilomena		curruca	misident.
Acu	690	valid	species	curruca (Dahlbom, 1844, Celia)	APOIDEA	Crabronidae	Pemphredoninae	Pemphredonini	Spilomena		curruca	(Dahlbom, 1844)		England	Celia
Acu	691	invalid	species	pulawskii Dolfuss, 1983	APOIDEA	Crabronidae	Pemphredoninae	Pemphredonini	Spilomena		pulawskii	Dolfuss, 1983
Acu	692	invalid	species	nikkoensis Tsuneki, 1971	APOIDEA	Crabronidae	Pemphredoninae	Pemphredonini	Spilomena		nikkoensis	Tsuneki, 1971
Acu	693	valid	species	enslini Blüthgen, 1953	APOIDEA	Crabronidae	Pemphredoninae	Pemphredonini	Spilomena		enslini	Blüthgen, 1953		England, Ireland
Acu	694	valid	species	troglodytes (Vander Linden, 1829, Stigmus)	APOIDEA	Crabronidae	Pemphredoninae	Pemphredonini	Spilomena		troglodytes	(Vander Linden, 1829)		England, Scotland, Wales	Stigmus
Acu	695	invalid	species	minutissimus (Radoszkowski, 1877, Stigmus)	APOIDEA	Crabronidae	Pemphredoninae	Pemphredonini	Spilomena		minutissimus	(Radoszkowski, 1877, Stigmus)
Acu	696	invalid	species	vagans Blüthgen, 1953	APOIDEA	Crabronidae	Pemphredoninae	Pemphredonini	Spilomena		vagans	Blüthgen, 1953
Acu	698	valid	genus	STIGMUS Panzer, 1805	APOIDEA	Crabronidae	Pemphredoninae	Pemphredonini	Stigmus			Panzer, 1805
Acu	699	invalid	genus	ANTRONIUS Zetterstedt, 1838	APOIDEA	Crabronidae	Pemphredoninae	Pemphredonini	ANTRONIUS			Zetterstedt, 1838
Acu	700	invalid	genus	GONOSTIGMUS Rohwer, 1911	APOIDEA	Crabronidae	Pemphredoninae	Pemphredonini	GONOSTIGMUS			Rohwer, 1911
Acu	701	invalid	genus	ATOPOSTIGMUS Krombein, 1973	APOIDEA	Crabronidae	Pemphredoninae	Pemphredonini	ATOPOSTIGMUS			Krombein, 1973
Acu	702	valid	species	pendulus Panzer, 1804	APOIDEA	Crabronidae	Pemphredoninae	Pemphredonini	Stigmus		pendulus	Panzer, 1804	added by Allen (1987)	England
Acu	703	invalid	species	ater Jurine, 1807	APOIDEA	Crabronidae	Pemphredoninae	Pemphredonini	Stigmus		ater	Jurine, 1807
Acu	704	valid	species	solskyi Morawitz, 1864	APOIDEA	Crabronidae	Pemphredoninae	Pemphredonini	Stigmus		solskyi	Morawitz, 1864		England, Wales
Acu	705	invalid	species	europaeus Tsuneki, 1954	APOIDEA	Crabronidae	Pemphredoninae	Pemphredonini	Stigmus		europaeus	Tsuneki, 1954
Acu	706	invalid	species	verhoeffi Tsuneki, 1954	APOIDEA	Crabronidae	Pemphredoninae	Pemphredonini	Stigmus		verhoeffi	Tsuneki, 1954
Acu	708	valid	tribe	PSENINI Costa, 1858	APOIDEA	Crabronidae	Pemphredoninae	Psenini				Costa, 1858
Acu	710	valid	genus	MIMESA Shuckard, 1837	APOIDEA	Crabronidae	Pemphredoninae	Psenini	Mimesa			Shuckard, 1837
Acu	711	invalid	genus	APORIA Wesmael, 1852 preocc.	APOIDEA	Crabronidae	Pemphredoninae	Psenini	APORIA			Wesmael, 1852
Acu	712	invalid	genus	APORINA Gussakovskij, 1937 preocc.	APOIDEA	Crabronidae	Pemphredoninae	Psenini	APORINA			Gussakovskij, 1937
Acu	713	valid	species	bicolor (Jurine, 1807, Psen)	APOIDEA	Crabronidae	Pemphredoninae	Psenini	Mimesa		bicolor	(Jurine, 1807)		England	Psen
Acu	714	invalid	species	equestris misident.	APOIDEA	Crabronidae	Pemphredoninae	Psenini	Mimesa		equestris	misident.
Acu	715	invalid	species	?rufa (Panzer, 1805, Psen)	APOIDEA	Crabronidae	Pemphredoninae	Psenini	Mimesa		?rufa	(Panzer, 1805, Psen)
Acu	716	valid	species	bruxellensis Bondroit, 1934	APOIDEA	Crabronidae	Pemphredoninae	Psenini	Mimesa		bruxellensis	Bondroit, 1934		England, Wales
Acu	717	invalid	species	rossicus (Gussakovskij, 1937, Psen)	APOIDEA	Crabronidae	Pemphredoninae	Psenini	Mimesa		rossicus	(Gussakovskij, 1937, Psen)
Acu	718	valid	species	equestris (Fabricius, 1804, Trypoxylon)	APOIDEA	Crabronidae	Pemphredoninae	Psenini	Mimesa		equestris	(Fabricius, 1804)		England, Scotland, Wales	Trypoxylon	equestre
Acu	719	invalid	species	bicolor misident.	APOIDEA	Crabronidae	Pemphredoninae	Psenini	Mimesa		bicolor	misident.
Acu	720	valid	species	lutaria (Fabricius, 1787, Sphex)	APOIDEA	Crabronidae	Pemphredoninae	Psenini	Mimesa		lutaria	(Fabricius, 1787)		England, Wales	Sphex	lutarius
Acu	721	invalid	species	shuckardi Wesmael, 1852	APOIDEA	Crabronidae	Pemphredoninae	Psenini	Mimesa		shuckardi	Wesmael, 1852
Acu	722	invalid	species	basirufa Packard, 1867	APOIDEA	Crabronidae	Pemphredoninae	Psenini	Mimesa		basirufa	Packard, 1867
Acu	723	invalid	species	nebrascensis Smith, 1908	APOIDEA	Crabronidae	Pemphredoninae	Psenini	Mimesa		nebrascensis	Smith, 1908
Acu	724	invalid	species	dispar (Gussakovskij, 1937, Psen)	APOIDEA	Crabronidae	Pemphredoninae	Psenini	Mimesa		dispar	(Gussakovskij, 1937, Psen)
Acu	725	invalid	species	mallochi Finnamore, 1980	APOIDEA	Crabronidae	Pemphredoninae	Psenini	Mimesa		mallochi	Finnamore, 1980
Acu	727	valid	genus	MIMUMESA Malloch, 1933	APOIDEA	Crabronidae	Pemphredoninae	Psenini	Mimumesa			Malloch, 1933
Acu	728	valid	species	atratina (Morawitz, 1891, Mimesa)	APOIDEA	Crabronidae	Pemphredoninae	Psenini	Mimumesa		atratina	(Morawitz, 1891)		England	Mimesa
Acu	729	invalid	species	carbonaria (Tournier, 1899, Mimesa)	APOIDEA	Crabronidae	Pemphredoninae	Psenini	Mimumesa		carbonaria	(Tournier, 1899, Mimesa)
Acu	730	invalid	species	belgica (Bondroit, 1932, Mimesa)	APOIDEA	Crabronidae	Pemphredoninae	Psenini	Mimumesa		belgica	(Bondroit, 1932, Mimesa)
Acu	731	invalid	species	longula (Gussakovskij, 1932, Mimesa)	APOIDEA	Crabronidae	Pemphredoninae	Psenini	Mimumesa		longula	(Gussakovskij, 1932, Mimesa)
Acu	732	invalid	species	sameshimai (Yasumatsu, 1937, Psen)	APOIDEA	Crabronidae	Pemphredoninae	Psenini	Mimumesa		sameshimai	(Yasumatsu, 1937, Psen)
Acu	733	valid	species	dahlbomi (Wesmael, 1852, Mimesa)	APOIDEA	Crabronidae	Pemphredoninae	Psenini	Mimumesa		dahlbomi	(Wesmael, 1852)		England, Scotland, Wales	Mimesa
Acu	734	valid	species	littoralis (Bondroit, 1934, Mimesa)	APOIDEA	Crabronidae	Pemphredoninae	Psenini	Mimumesa		littoralis	(Bondroit, 1934)		England, Wales, Ireland	Mimesa
Acu	735	invalid	species	unicolor misident.	APOIDEA	Crabronidae	Pemphredoninae	Psenini	Mimumesa		unicolor	misident.
Acu	736	invalid	species	fulvitarsis (Gussakovskij, 1934, Psen)	APOIDEA	Crabronidae	Pemphredoninae	Psenini	Mimumesa		fulvitarsis	(Gussakovskij, 1934, Psen)
Acu	737	invalid	species	fulvitarsis (Gussakovskij, 1937, Psen) preocc.	APOIDEA	Crabronidae	Pemphredoninae	Psenini	Mimumesa		fulvitarsis	(Gussakovskij, 1937, Psen) preocc.
Acu	738	invalid	species	celtica (Spooner, 1948, Mimesa)	APOIDEA	Crabronidae	Pemphredoninae	Psenini	Mimumesa		celtica	(Spooner, 1948, Mimesa)
Acu	739	valid	species	spooneri (Richards, 1948, Mimesa)	APOIDEA	Crabronidae	Pemphredoninae	Psenini	Mimumesa		spooneri	(Richards, 1948)		England	Mimesa
Acu	740	valid	species	unicolor (Vander Linden, 1829, Psen)	APOIDEA	Crabronidae	Pemphredoninae	Psenini	Mimumesa		unicolor	(Vander Linden, 1829)	added by Else & Felton (1994)	England	Psen
Acu	741	invalid	species	borealis (Dahlbom, 1842, Mimesa)	APOIDEA	Crabronidae	Pemphredoninae	Psenini	Mimumesa		borealis	(Dahlbom, 1842, Mimesa)
Acu	742	invalid	species	palliditarsis (Saunders, 1904, Mimesa)	APOIDEA	Crabronidae	Pemphredoninae	Psenini	Mimumesa		palliditarsis	(Saunders, 1904, Mimesa)
Acu	743	invalid	species	oresterus (van Lith, 1976, Psen)	APOIDEA	Crabronidae	Pemphredoninae	Psenini	Mimumesa		oresterus	(van Lith, 1976, Psen)
Acu	745	valid	genus	PSEN Latreille, 1796	APOIDEA	Crabronidae	Pemphredoninae	Psenini	Psen			Latreille, 1796
Acu	746	invalid	genus	PSENUS Rafinesque, 1815	APOIDEA	Crabronidae	Pemphredoninae	Psenini	PSENUS			Rafinesque, 1815
Acu	747	invalid	genus	PSENIA Stephens, 1829	APOIDEA	Crabronidae	Pemphredoninae	Psenini	PSENIA			Stephens, 1829
Acu	748	invalid	genus	DAHLBOMIA Wissmann, 1849	APOIDEA	Crabronidae	Pemphredoninae	Psenini	DAHLBOMIA			Wissmann, 1849
Acu	749	invalid	genus	MESOPORA Wesmael, 1852	APOIDEA	Crabronidae	Pemphredoninae	Psenini	MESOPORA			Wesmael, 1852
Acu	750	invalid	genus	CAENOPSEN Cameron, 1899	APOIDEA	Crabronidae	Pemphredoninae	Psenini	CAENOPSEN			Cameron, 1899
Acu	751	valid	species	ater (Olivier, 1792, Crabro)	APOIDEA	Crabronidae	Pemphredoninae	Psenini	Psen		ater	(Olivier, 1792)		England	Crabro
Acu	752	invalid	species	ater (Fabricius, 1794, Sphex) preocc.	APOIDEA	Crabronidae	Pemphredoninae	Psenini	Psen		ater	(Fabricius, 1794, Sphex) preocc.
Acu	753	invalid	species	compressicornis (Fabricius, 1804, Pelopoeus)	APOIDEA	Crabronidae	Pemphredoninae	Psenini	Psen		compressicornis	(Fabricius, 1804, Pelopoeus)
Acu	754	invalid	species	atratus (Jurine, 1807, Psen)	APOIDEA	Crabronidae	Pemphredoninae	Psenini	Psen		atratus	(Jurine, 1807, Psen)
Acu	755	invalid	species	serraticornis (Jurine, 1807, Psen)	APOIDEA	Crabronidae	Pemphredoninae	Psenini	Psen		serraticornis	(Jurine, 1807, Psen)
Acu	757	valid	genus	PSENULUS Kohl, 1897	APOIDEA	Crabronidae	Pemphredoninae	Psenini	Psenulus			Kohl, 1897
Acu	758	invalid	genus	DIODONTUS misident.	APOIDEA	Crabronidae	Pemphredoninae	Psenini	DIODONTUS			misident.	Misidentification of American authors in older literature.
Acu	759	invalid	genus	NEOFOXIA Viereck, 1901	APOIDEA	Crabronidae	Pemphredoninae	Psenini	NEOFOXIA			Viereck, 1901
Acu	760	invalid	genus	STENOMELLINUS Schulz, 1911	APOIDEA	Crabronidae	Pemphredoninae	Psenini	STENOMELLINUS			Schulz, 1911
Acu	761	invalid	genus	EOPSENULUS Gussakovskij, 1934	APOIDEA	Crabronidae	Pemphredoninae	Psenini	EOPSENULUS			Gussakovskij, 1934
Acu	762	invalid	genus	NIPPONOPSEN Yasumatsu, 1938	APOIDEA	Crabronidae	Pemphredoninae	Psenini	NIPPONOPSEN			Yasumatsu, 1938
Acu	763	valid	species	concolor (Dahlbom, 1843, Psen)	APOIDEA	Crabronidae	Pemphredoninae	Psenini	Psenulus		concolor	(Dahlbom, 1843)		England, Wales	Psen
Acu	764	invalid	species	intermedius (Schenck, 1857, Psen)	APOIDEA	Crabronidae	Pemphredoninae	Psenini	Psenulus		intermedius	(Schenck, 1857, Psen)
Acu	765	invalid	species	ambiguus (Schenck, 1857, Psen)	APOIDEA	Crabronidae	Pemphredoninae	Psenini	Psenulus		ambiguus	(Schenck, 1857, Psen)
Acu	766	valid	species	pallipes (Panzer, 1798, Sphex)	APOIDEA	Crabronidae	Pemphredoninae	Psenini	Psenulus		pallipes	(Panzer, 1798)		England, Wales, Ireland	Sphex
Acu	767	invalid	species	atratus (Fabricius, 1804, Trypoxylon)	APOIDEA	Crabronidae	Pemphredoninae	Psenini	Psenulus		atratus	(Fabricius, 1804, Trypoxylon)
Acu	768	invalid	species	montanus (Costa, 1861, Psen)	APOIDEA	Crabronidae	Pemphredoninae	Psenini	Psenulus		montanus	(Costa, 1861, Psen)
Acu	769	invalid	species	haemorrhoidalis (Costa, 1871, Psen)	APOIDEA	Crabronidae	Pemphredoninae	Psenini	Psenulus		haemorrhoidalis	(Costa, 1871, Psen)
Acu	770	invalid	species	minutus (Tournier, 1899, Psen)	APOIDEA	Crabronidae	Pemphredoninae	Psenini	Psenulus		minutus	(Tournier, 1899, Psen)
Acu	771	invalid	species	chevrieri (Tournier, 1899, Psen)	APOIDEA	Crabronidae	Pemphredoninae	Psenini	Psenulus		chevrieri	(Tournier, 1899, Psen)
Acu	772	invalid	species	nigricornis (Tournier, 1899, Psen)	APOIDEA	Crabronidae	Pemphredoninae	Psenini	Psenulus		nigricornis	(Tournier, 1899, Psen)
Acu	773	invalid	species	pygmaeus (Tournier, 1899, Psen)	APOIDEA	Crabronidae	Pemphredoninae	Psenini	Psenulus		pygmaeus	(Tournier, 1899, Psen)
Acu	774	invalid	species	rubicola Harttig, 1931	APOIDEA	Crabronidae	Pemphredoninae	Psenini	Psenulus		rubicola	Harttig, 1931
Acu	775	invalid	species	brevitarsis Merisuo, 1937	APOIDEA	Crabronidae	Pemphredoninae	Psenini	Psenulus		brevitarsis	Merisuo, 1937
Acu	776	valid	species	schencki (Tournier, 1889, Psen)	APOIDEA	Crabronidae	Pemphredoninae	Psenini	Psenulus		schencki	(Tournier, 1889)		England	Psen
Acu	777	invalid	species	simplex (Tournier, 1899, Psen)	APOIDEA	Crabronidae	Pemphredoninae	Psenini	Psenulus		simplex	(Tournier, 1899, Psen)
Acu	778	invalid	species	longulus (Tournier, 1899, Psen)	APOIDEA	Crabronidae	Pemphredoninae	Psenini	Psenulus		longulus	(Tournier, 1899, Psen)
Acu	780	valid	Subfamily	Philanthinae Latreille, 1802	APOIDEA	Crabronidae	Philanthinae					Latreille, 1802
Acu	782	valid	tribe	CERCERINI Lepeletier, 1845	APOIDEA	Crabronidae	Philanthinae	Cercerini				Lepeletier, 1845
Acu	784	valid	genus	CERCERIS Latreille, 1802	APOIDEA	Crabronidae	Philanthinae	Cercerini	Cerceris			Latreille, 1802
Acu	785	invalid	genus	NECTANEBUS Spinola, 1839	APOIDEA	Crabronidae	Philanthinae	Cercerini	NECTANEBUS			Spinola, 1839
Acu	786	invalid	genus	DIAMMA Dahlbom, 1844 preocc.	APOIDEA	Crabronidae	Philanthinae	Cercerini	DIAMMA			Dahlbom, 1844
Acu	787	invalid	genus	DIDESMUS Dahlbom, 1845	APOIDEA	Crabronidae	Philanthinae	Cercerini	DIDESMUS			Dahlbom, 1845
Acu	788	invalid	genus	APIRAPTRIX Shestakov, 1923	APOIDEA	Crabronidae	Philanthinae	Cercerini	APIRAPTRIX			Shestakov, 1923
Acu	789	invalid	genus	PARACERCERIS Brèthes, 1913	APOIDEA	Crabronidae	Philanthinae	Cercerini	PARACERCERIS			Brèthes, 1913
Acu	790	invalid	genus	BUCERCERIS Minkiewicz, 1934	APOIDEA	Crabronidae	Philanthinae	Cercerini	BUCERCERIS			Minkiewicz, 1934
Acu	791	invalid	genus	STERCOBATA Gussakovskij, 1935	APOIDEA	Crabronidae	Philanthinae	Cercerini	STERCOBATA			Gussakovskij, 1935
Acu	792	invalid	genus	APICERCERIS Pate, 1937	APOIDEA	Crabronidae	Philanthinae	Cercerini	APICERCERIS			Pate, 1937
Acu	793	valid	species	arenaria (Linnaeus, 1758, Sphex)	APOIDEA	Crabronidae	Philanthinae	Cercerini	Cerceris		arenaria	(Linnaeus, 1758)		England, Wales	Sphex	arenarius
Acu	794	invalid	species	xanthocephala (Forster, 1771, Sphex)	APOIDEA	Crabronidae	Philanthinae	Cercerini	Cerceris		xanthocephala	(Forster, 1771, Sphex)
Acu	795	invalid	species	exulta (Harris, 1776, Vespa)	APOIDEA	Crabronidae	Philanthinae	Cercerini	Cerceris		exulta	(Harris, 1776, Vespa)
Acu	796	invalid	species	petulans (Harris, 1776, Vespa)	APOIDEA	Crabronidae	Philanthinae	Cercerini	Cerceris		petulans	(Harris, 1776, Vespa)
Acu	797	invalid	species	serripes (Fabricius, 1781, Vespa)	APOIDEA	Crabronidae	Philanthinae	Cercerini	Cerceris		serripes	(Fabricius, 1781, Vespa)
Acu	798	invalid	species	arenosa (Gmelin, 1790, Vespa)	APOIDEA	Crabronidae	Philanthinae	Cercerini	Cerceris		arenosa	(Gmelin, 1790, Vespa)
Acu	799	invalid	species	aurita (Fabricius, 1794, Philanthus)	APOIDEA	Crabronidae	Philanthinae	Cercerini	Cerceris		aurita	(Fabricius, 1794, Philanthus)
Acu	800	invalid	species	striolata Schletterer, 1887	APOIDEA	Crabronidae	Philanthinae	Cercerini	Cerceris		striolata	Schletterer, 1887
Acu	801	valid	species	quadricincta (Panzer, 1799, Philanthus)	APOIDEA	Crabronidae	Philanthinae	Cercerini	Cerceris		quadricincta	(Panzer, 1799)		England	Philanthus	quadricinctus
Acu	802	invalid	species	fasciata Spinola, 1806	APOIDEA	Crabronidae	Philanthinae	Cercerini	Cerceris		fasciata	Spinola, 1806
Acu	803	valid	species	quinquefasciata (Rossi, 1792, Crabro)	APOIDEA	Crabronidae	Philanthinae	Cercerini	Cerceris		quinquefasciata	(Rossi, 1792)		England	Crabro	quinquefasciatus
Acu	804	invalid	species	interrupta misident.	APOIDEA	Crabronidae	Philanthinae	Cercerini	Cerceris		interrupta	misident.
Acu	805	invalid	species	nasuta Dahlbom, 1844 preocc.	APOIDEA	Crabronidae	Philanthinae	Cercerini	Cerceris		nasuta	Dahlbom, 1844 preocc.
Acu	806	invalid	species	subdepressa Lepeletier, 1845	APOIDEA	Crabronidae	Philanthinae	Cercerini	Cerceris		subdepressa	Lepeletier, 1845
Acu	807	valid	species	ruficornis (Fabricius, 1793, Philanthus)	APOIDEA	Crabronidae	Philanthinae	Cercerini	Cerceris		ruficornis	(Fabricius, 1793)		England	Philanthus
Acu	808	invalid	species	labiata misident.	APOIDEA	Crabronidae	Philanthinae	Cercerini	Cerceris		labiata	misident.
Acu	809	invalid	species	bidens (Schrank, 1802, Crabro)	APOIDEA	Crabronidae	Philanthinae	Cercerini	Cerceris		bidens	(Schrank, 1802, Crabro)
Acu	810	invalid	species	cunicularia (Schrank, 1802, Crabro)	APOIDEA	Crabronidae	Philanthinae	Cercerini	Cerceris		cunicularia	(Schrank, 1802, Crabro)
Acu	811	invalid	species	quadricincta (Fabricius, 1804, Mellinus)	APOIDEA	Crabronidae	Philanthinae	Cercerini	Cerceris		quadricincta	(Fabricius, 1804, Mellinus)
Acu	812	invalid	species	trifidus (Fabricius, 1804, Philanthus)	APOIDEA	Crabronidae	Philanthinae	Cercerini	Cerceris		trifidus	(Fabricius, 1804, Philanthus)
Acu	813	invalid	species	?nasuta Latreille, 1809	APOIDEA	Crabronidae	Philanthinae	Cercerini	Cerceris		?nasuta	Latreille, 1809
Acu	814	invalid	species	laminifera Costa, 1867	APOIDEA	Crabronidae	Philanthinae	Cercerini	Cerceris		laminifera	Costa, 1867
Acu	815	valid	species	rybyensis (Linnaeus, 1771, Sphex)	APOIDEA	Crabronidae	Philanthinae	Cercerini	Cerceris		rybyensis	(Linnaeus, 1771)		England	Sphex
Acu	816	invalid	species	ornata (Fabricius, 1790, Philanthus)	APOIDEA	Crabronidae	Philanthinae	Cercerini	Cerceris		ornata	(Fabricius, 1790, Philanthus)
Acu	817	invalid	species	apifalco (Christ, 1791, Sphex)	APOIDEA	Crabronidae	Philanthinae	Cercerini	Cerceris		apifalco	(Christ, 1791, Sphex)
Acu	818	invalid	species	semicincta (Panzer, 1797, Philanthus)	APOIDEA	Crabronidae	Philanthinae	Cercerini	Cerceris		semicincta	(Panzer, 1797, Philanthus)
Acu	819	invalid	species	hortorum (Panzer, 1799, Philanthus)	APOIDEA	Crabronidae	Philanthinae	Cercerini	Cerceris		hortorum	(Panzer, 1799, Philanthus)
Acu	820	invalid	species	variabilis (Schrank, 1802, Crabro)	APOIDEA	Crabronidae	Philanthinae	Cercerini	Cerceris		variabilis	(Schrank, 1802, Crabro)
Acu	821	invalid	species	biguttata (Thunberg, 1815, Philanthus)	APOIDEA	Crabronidae	Philanthinae	Cercerini	Cerceris		biguttata	(Thunberg, 1815, Philanthus)
Acu	822	invalid	species	colon (Thunberg, 1815, Philanthus)	APOIDEA	Crabronidae	Philanthinae	Cercerini	Cerceris		colon	(Thunberg, 1815, Philanthus)
Acu	823	invalid	species	kashmirensis Nurse, 1903	APOIDEA	Crabronidae	Philanthinae	Cercerini	Cerceris		kashmirensis	Nurse, 1903
Acu	824	invalid	species	dittrichi Schulz, 1904	APOIDEA	Crabronidae	Philanthinae	Cercerini	Cerceris		dittrichi	Schulz, 1904
Acu	825	invalid	species	reginae Eck, 1979	APOIDEA	Crabronidae	Philanthinae	Cercerini	Cerceris		reginae	Eck, 1979
Acu	826	valid	species	sabulosa (Panzer, 1799, Philanthus)	APOIDEA	Crabronidae	Philanthinae	Cercerini	Cerceris		sabulosa	(Panzer, 1799)		England	Philanthus	sabulosus
Acu	827	invalid	species	emarginata (Panzer, 1799, Philanthus)	APOIDEA	Crabronidae	Philanthinae	Cercerini	Cerceris		emarginata	(Panzer, 1799, Philanthus)
Acu	828	invalid	species	tricincta (Spinola, 1805, Philanthus)	APOIDEA	Crabronidae	Philanthinae	Cercerini	Cerceris		tricincta	(Spinola, 1805, Philanthus)
Acu	829	invalid	species	?pygmaea (Thunberg, 1815, Philanthus)	APOIDEA	Crabronidae	Philanthinae	Cercerini	Cerceris		?pygmaea	(Thunberg, 1815, Philanthus)
Acu	830	invalid	species	minuta Lepeletier, 1845	APOIDEA	Crabronidae	Philanthinae	Cercerini	Cerceris		minuta	Lepeletier, 1845
Acu	831	invalid	species	superba Shestakov, 1923	APOIDEA	Crabronidae	Philanthinae	Cercerini	Cerceris		superba	Shestakov, 1923
Acu	833	valid	tribe	PhilanthinI Latreille, 1802	APOIDEA	Crabronidae	Philanthinae	Philanthini				Latreille, 1802
Acu	835	valid	genus	PHILANTHUS Fabricius, 1790	APOIDEA	Crabronidae	Philanthinae	Philanthini	Philanthus			Fabricius, 1790
Acu	836	invalid	genus	SYMBLEPHILUS Panzer, 1806	APOIDEA	Crabronidae	Philanthinae	Philanthini	SYMBLEPHILUS			Panzer, 1806
Acu	837	invalid	genus	SIMBLEPHILUS Jurine, 1807	APOIDEA	Crabronidae	Philanthinae	Philanthini	SIMBLEPHILUS			Jurine, 1807
Acu	838	invalid	genus	CHEILOPOGONUS Westwood, 1835	APOIDEA	Crabronidae	Philanthinae	Philanthini	CHEILOPOGONUS			Westwood, 1835
Acu	839	invalid	genus	ANTHOPHILUS Dahlbom, 1844	APOIDEA	Crabronidae	Philanthinae	Philanthini	ANTHOPHILUS			Dahlbom, 1844
Acu	840	invalid	genus	EPHIPHILANTHUS Ashmead, 1899	APOIDEA	Crabronidae	Philanthinae	Philanthini	EPHIPHILANTHUS			Ashmead, 1899
Acu	841	invalid	genus	PSEUDOPHILANTHUS Ashmead, 1899	APOIDEA	Crabronidae	Philanthinae	Philanthini	PSEUDOPHILANTHUS			Ashmead, 1899
Acu	842	invalid	genus	OCLOCLETES Banks, 1913	APOIDEA	Crabronidae	Philanthinae	Philanthini	OCLOCLETES			Banks, 1913
Acu	843	valid	species	triangulum (Fabricius, 1775, Vespa)	APOIDEA	Crabronidae	Philanthinae	Philanthini	Philanthus		triangulum	(Fabricius, 1775)		England, Wales	Vespa
Acu	844	invalid	species	ruspatrix (Linnaeus, 1767, Vespa) suppressed	APOIDEA	Crabronidae	Philanthinae	Philanthini	Philanthus		ruspatrix	(Linnaeus, 1767, Vespa) suppressed
Acu	845	invalid	species	fasciatus (Geoffroy, 1785, Vespa)	APOIDEA	Crabronidae	Philanthinae	Philanthini	Philanthus		fasciatus	(Geoffroy, 1785, Vespa)
Acu	846	invalid	species	maculatus (Christ, 1791, Sphex)	APOIDEA	Crabronidae	Philanthinae	Philanthini	Philanthus		maculatus	(Christ, 1791, Sphex)
Acu	847	invalid	species	limbatus (Olivier, 1792, Vespa)	APOIDEA	Crabronidae	Philanthinae	Philanthini	Philanthus		limbatus	(Olivier, 1792, Vespa)
Acu	848	invalid	species	androgynus (Rossi, 1792, Crabro)	APOIDEA	Crabronidae	Philanthinae	Philanthini	Philanthus		androgynus	(Rossi, 1792, Crabro)
Acu	849	invalid	species	pictus Panzer, 1797	APOIDEA	Crabronidae	Philanthinae	Philanthini	Philanthus		pictus	Panzer, 1797
Acu	850	invalid	species	discolor Panzer, 1799	APOIDEA	Crabronidae	Philanthinae	Philanthini	Philanthus		discolor	Panzer, 1799
Acu	851	invalid	species	apivorus Latreille, 1799	APOIDEA	Crabronidae	Philanthinae	Philanthini	Philanthus		apivorus	Latreille, 1799
Acu	852	invalid	species	allionii Dahlbom, 1845	APOIDEA	Crabronidae	Philanthinae	Philanthini	Philanthus		allionii	Dahlbom, 1845
Acu	854	valid	Family	Sphecidae Latreille, 1802	APOIDEA	Sphecidae						Latreille, 1802
Acu	856	valid	Subfamily	AMMOPHILINAE André, 1886	APOIDEA	Sphecidae	Ammophilinae					André, 1886
Acu	858	valid	genus	AMMOPHILA Kirby, 1798	APOIDEA	Sphecidae	AMMOPHILINAE		Ammophila			Kirby, 1798
Acu	859	invalid	genus	SPHEX misident.	APOIDEA	Sphecidae	AMMOPHILINAE		SPHEX			misident.
Acu	860	invalid	genus	MISCUS Jurine, 1807	APOIDEA	Sphecidae	AMMOPHILINAE		MISCUS			Jurine, 1807
Acu	861	invalid	genus	COLOPTERA Latreille, 1845	APOIDEA	Sphecidae	AMMOPHILINAE		COLOPTERA			Latreille, 1845
Acu	862	invalid	genus	ARGYRAMMOPHILA Gussakovskij, 1928	APOIDEA	Sphecidae	AMMOPHILINAE		ARGYRAMMOPHILA			Gussakovskij, 1928
Acu	863	invalid	genus	APYCNEMIA Leclercq, 1961	APOIDEA	Sphecidae	AMMOPHILINAE		APYCNEMIA			Leclercq, 1961
Acu	864	valid	species	pubescens Curtis, 1836	APOIDEA	Sphecidae	AMMOPHILINAE		Ammophila		pubescens	Curtis, 1836		England, Wales
Acu	865	invalid	species	campestris misident.	APOIDEA	Sphecidae	AMMOPHILINAE		Ammophila		campestris	misident.
Acu	866	invalid	species	arvensis (Dahlbom, 1843, Miscus)	APOIDEA	Sphecidae	AMMOPHILINAE		Ammophila		arvensis	(Dahlbom, 1843, Miscus)
Acu	867	invalid	species	susterai Šnoflak, 1943	APOIDEA	Sphecidae	AMMOPHILINAE		Ammophila		susterai	Šnoflak, 1943
Acu	868	invalid	species	adriaansei Wilcke, 1945	APOIDEA	Sphecidae	AMMOPHILINAE		Ammophila		adriaansei	Wilcke, 1945
Acu	869	valid	species	sabulosa (Linnaeus, 1758, Sphex)	APOIDEA	Sphecidae	AMMOPHILINAE		Ammophila		sabulosa	(Linnaeus, 1758)		England, Scotland, Wales, Ireland	Sphex	sabulosus
Acu	870	invalid	species	hortensis (Poda, 1761, Sphex)	APOIDEA	Sphecidae	AMMOPHILINAE		Ammophila		hortensis	(Poda, 1761, Sphex)
Acu	871	invalid	species	frischii (Geoffroy, 1785, Ichneumon)	APOIDEA	Sphecidae	AMMOPHILINAE		Ammophila		frischii	(Geoffroy, 1785, Ichneumon)
Acu	872	invalid	species	dimidiata (Christ, 1791, Sphex) preocc.	APOIDEA	Sphecidae	AMMOPHILINAE		Ammophila		dimidiata	(Christ, 1791, Sphex) preocc.
Acu	873	invalid	species	vulgaris Kirby, 1798	APOIDEA	Sphecidae	AMMOPHILINAE		Ammophila		vulgaris	Kirby, 1798
Acu	874	invalid	species	pulvillata Sowerby, 1805	APOIDEA	Sphecidae	AMMOPHILINAE		Ammophila		pulvillata	Sowerby, 1805
Acu	875	invalid	species	mucronata (Jurine, 1807, Sphex)	APOIDEA	Sphecidae	AMMOPHILINAE		Ammophila		mucronata	(Jurine, 1807, Sphex)
Acu	876	invalid	species	cyanescens Dahlbom, 1845	APOIDEA	Sphecidae	AMMOPHILINAE		Ammophila		cyanescens	Dahlbom, 1845
Acu	877	invalid	species	?vischu Cameron, 1889	APOIDEA	Sphecidae	AMMOPHILINAE		Ammophila		?vischu	Cameron, 1889
Acu	878	invalid	species	kamtschatica Gussakovskij, 1932	APOIDEA	Sphecidae	AMMOPHILINAE		Ammophila		kamtschatica	Gussakovskij, 1932
Acu	880	valid	genus	PODALONIA Fernald, 1927	APOIDEA	Sphecidae	AMMOPHILINAE		Podalonia			Fernald, 1927
Acu	881	invalid	genus	PSAMMOPHILA Dahlbom, 1842 preocc.	APOIDEA	Sphecidae	AMMOPHILINAE		PSAMMOPHILA			Dahlbom, 1842
Acu	882	invalid	genus	PODALONIA Spinola, 1853 suppressed	APOIDEA	Sphecidae	AMMOPHILINAE		PODALONIA			Spinola, 1853
Acu	883	valid	species	affinis (Kirby, 1798, Ammophila)	APOIDEA	Sphecidae	AMMOPHILINAE		Podalonia		affinis	(Kirby, 1798)		England, Wales	Ammophila
Acu	884	invalid	species	lutaria misident.	APOIDEA	Sphecidae	AMMOPHILINAE		Podalonia		lutaria	misident.
Acu	885	invalid	species	ariasi (Mercet, 1906, Ammophila)	APOIDEA	Sphecidae	AMMOPHILINAE		Podalonia		ariasi	(Mercet, 1906, Ammophila)
Acu	886	valid	species	hirsuta (Scopoli, 1763, Sphex)	APOIDEA	Sphecidae	AMMOPHILINAE		Podalonia		hirsuta	(Scopoli, 1763)		England, Wales	Sphex	hirsutus
Acu	887	invalid	species	viatica misident.	APOIDEA	Sphecidae	AMMOPHILINAE		Podalonia		viatica	misident.
Acu	888	invalid	species	arenaria (Fabricius, 1787, Sphex) preocc.	APOIDEA	Sphecidae	AMMOPHILINAE		Podalonia		arenaria	(Fabricius, 1787, Sphex) preocc.
Acu	889	invalid	species	arenosa (Gmelin, 1790, Sphex)	APOIDEA	Sphecidae	AMMOPHILINAE		Podalonia		arenosa	(Gmelin, 1790, Sphex)
Acu	890	invalid	species	argentea (Kirby, 1798, Ammophila)	APOIDEA	Sphecidae	AMMOPHILINAE		Podalonia		argentea	(Kirby, 1798, Ammophila)
Acu	892	valid	genus	Anthophila Latreille, 1804	APOIDEA	Sphecidae	AMMOPHILINAE		Anthophila			Latreille, 1804	Engel (2005) proposed that the name Anthophila, without formal rank, be used for the bees. Note that ‘apiformes’ (and the corresponding ‘spheciformes’) is an equivalent term proposed by Brothers (1975).
Acu	894	valid	Family	Andrenidae Latreille, 1802	APOIDEA	Andrenidae						Latreille, 1802
Acu	896	valid	Subfamily	Andreninae Latreille, 1802	APOIDEA	Andrenidae	Andreninae					Latreille, 1802
Acu	898	valid	genus	ANDRENA Fabricius, 1775	APOIDEA	Andrenidae	Andreninae		Andrena			Fabricius, 1775	Taxonomy follows Gusenleitner & Schwarz (2002a).
Acu	899	valid	subgenus	ANDRENA Fabricius, 1775	APOIDEA	Andrenidae	Andreninae		Andrena	Andrena		Fabricius, 1775
Acu	900	invalid	genus	ANTHRENA Illiger, 1801	APOIDEA	Andrenidae	Andreninae		ANTHRENA			Illiger, 1801
Acu	901	invalid	genus	ANTHOCHARESSA Gistel, 1850	APOIDEA	Andrenidae	Andreninae		ANTHOCHARESSA			Gistel, 1850
Acu	902	valid	species	apicata Smith, 1847	APOIDEA	Andrenidae	Andreninae		Andrena		apicata	Smith, 1847		England, Wales, Ireland
Acu	903	valid	species	clarkella (Kirby, 1802, Melitta)	APOIDEA	Andrenidae	Andreninae		Andrena		clarkella	(Kirby, 1802)		England, Scotland, Wales, Ireland, Isle of Man	Melitta
Acu	904	valid	species	fucata Smith, 1847	APOIDEA	Andrenidae	Andreninae		Andrena		fucata	Smith, 1847		England, Scotland, Wales, Ireland, Isle of Man
Acu	905	valid	species	fulva (Müller, 1766, Apis)	APOIDEA	Andrenidae	Andreninae		Andrena		fulva	(Müller, 1766)		England, Scotland, Wales, Ireland	Apis
Acu	906	invalid	species	armata (Gmelin, 1790, Apis)	APOIDEA	Andrenidae	Andreninae		Andrena		armata	(Gmelin, 1790, Apis)
Acu	907	valid	species	helvola (Linnaeus, 1758, Apis)	APOIDEA	Andrenidae	Andreninae		Andrena		helvola	(Linnaeus, 1758)		England, Scotland, Wales	Apis
Acu	908	invalid	species	subdentata (Kirby, 1802, Melitta)	APOIDEA	Andrenidae	Andreninae		Andrena		subdentata	(Kirby, 1802, Melitta)
Acu	909	valid	species	lapponica Zetterstedt, 1838	APOIDEA	Andrenidae	Andreninae		Andrena		lapponica	Zetterstedt, 1838		England, Scotland, Wales, Ireland, Isle of Man
Acu	910	valid	species	praecox (Scopoli, 1763, Apis)	APOIDEA	Andrenidae	Andreninae		Andrena		praecox	(Scopoli, 1763)		England, Wales, Ireland	Apis
Acu	911	invalid	species	smithella (Kirby, 1802, Melitta)	APOIDEA	Andrenidae	Andreninae		Andrena		smithella	(Kirby, 1802, Melitta)
Acu	912	invalid	species	clypeata Smith, 1855 preocc.	APOIDEA	Andrenidae	Andreninae		Andrena		clypeata	Smith, 1855 preocc.
Acu	913	valid	species	synadelpha Perkins, 1914	APOIDEA	Andrenidae	Andreninae		Andrena		synadelpha	Perkins, 1914		England, Scotland, Wales
Acu	914	invalid	species	ambigua Perkins, 1895, preocc.	APOIDEA	Andrenidae	Andreninae		Andrena		ambigua	Perkins, 1895, preocc.
Acu	915	valid	species	varians (Kirby, 1802, Melitta)	APOIDEA	Andrenidae	Andreninae		Andrena		varians	(Kirby, 1802)		England, Wales	Melitta
Acu	916	invalid	species	varians (Rossius, 1792, Apis): misident.	APOIDEA	Andrenidae	Andreninae		Andrena		varians	(Rossius, 1792, Apis): misident.
Acu	917	invalid	species	angulosa (Kirby, 1802, Melitta)	APOIDEA	Andrenidae	Andreninae		Andrena		angulosa	(Kirby, 1802, Melitta)
Acu	919	valid	subgenus	CHARITANDRENA Hedicke, 1933	APOIDEA	Andrenidae	Andreninae		Andrena	Charitandrena		Hedicke, 1933
Acu	920	valid	species	hattorfiana (Fabricius, 1775, Nomada)	APOIDEA	Andrenidae	Andreninae		Andrena	Charitandrena	hattorfiana	(Fabricius, 1775)		England, Wales	Nomada
Acu	921	invalid	species	lathamana (Kirby, 1802, Melitta)	APOIDEA	Andrenidae	Andreninae		Andrena	Charitandrena	lathamana	(Kirby, 1802, Melitta)
Acu	923	valid	subgenus	CHLORANDRENA Pérez, 1890	APOIDEA	Andrenidae	Andreninae		Andrena	Chlorandrena		Pérez, 1890
Acu	924	valid	species	humilis Imhoff, 1832	APOIDEA	Andrenidae	Andreninae		Andrena	Chlorandrena	humilis	Imhoff, 1832		England, Wales, Isle of Man
Acu	925	invalid	species	fulvescens Smith, 1847	APOIDEA	Andrenidae	Andreninae		Andrena	Chlorandrena	fulvescens	Smith, 1847
Acu	927	valid	subgenus	CHRYSANDRENA Hedicke, 1933	APOIDEA	Andrenidae	Andreninae		Andrena	Chrysandrena		Hedicke, 1933
Acu	928	valid	species	fulvago (Christ, 1791, Apis)	APOIDEA	Andrenidae	Andreninae		Andrena	Chrysandrena	fulvago	(Christ, 1791)		England, Wales	Apis
Acu	929	invalid	species	constricta Smith, 1849	APOIDEA	Andrenidae	Andreninae		Andrena	Chrysandrena	constricta	Smith, 1849
Acu	931	valid	subgenus	CNEMIDANDRENA Hedicke, 1933	APOIDEA	Andrenidae	Andreninae		Andrena	Cnemidandrena		Hedicke, 1933
Acu	932	valid	species	denticulata (Kirby, 1802, Melitta)	APOIDEA	Andrenidae	Andreninae		Andrena	Cnemidandrena	denticulata	(Kirby, 1802)		England, Scotland, Wales, Ireland, Isle of Man	Melitta
Acu	933	invalid	species	listerella (Kirby, 1802, Melitta)	APOIDEA	Andrenidae	Andreninae		Andrena	Cnemidandrena	listerella	(Kirby, 1802, Melitta)
Acu	934	valid	species	fuscipes (Kirby, 1802, Melitta)	APOIDEA	Andrenidae	Andreninae		Andrena	Cnemidandrena	fuscipes	(Kirby, 1802)		England, Scotland, Wales, Ireland, Isle of Man	Melitta
Acu	935	valid	species	nigriceps (Kirby, 1802, Melitta)	APOIDEA	Andrenidae	Andreninae		Andrena	Cnemidandrena	nigriceps	(Kirby, 1802)		England, Scotland, Wales	Melitta
Acu	936	invalid	species	lanifrons (Kirby, 1802, Melitta)	APOIDEA	Andrenidae	Andreninae		Andrena	Cnemidandrena	lanifrons	(Kirby, 1802, Melitta)
Acu	937	valid	species	simillima Smith, 1851	APOIDEA	Andrenidae	Andreninae		Andrena	Cnemidandrena	simillima	Smith, 1851		England
Acu	938	valid	species	tridentata (Kirby, 1802, Melitta)	APOIDEA	Andrenidae	Andreninae		Andrena	Cnemidandrena	tridentata	(Kirby, 1802)	Probably extinct in Britain.	England	Melitta
Acu	939	invalid	species	rufitarsis (Kirby, 1802, Melitta)	APOIDEA	Andrenidae	Andreninae		Andrena	Cnemidandrena	rufitarsis	(Kirby, 1802, Melitta)
Acu	941	valid	subgenus	EUANDRENA Hedicke, 1933	APOIDEA	Andrenidae	Andreninae		Andrena	Euandrena		Hedicke, 1933
Acu	942	invalid	genus	XANTHANDRENA Lanham, 1949	APOIDEA	Andrenidae	Andreninae		XANTHANDRENA			Lanham, 1949
Acu	943	invalid	genus	GEANDRENA LaBerge, 1964	APOIDEA	Andrenidae	Andreninae		GEANDRENA			LaBerge, 1964
Acu	944	valid	species	bicolor Fabricius, 1775	APOIDEA	Andrenidae	Andreninae		Andrena		bicolor	Fabricius, 1775		England, Scotland, Wales, Ireland, Isle of Man
Acu	945	invalid	species	picicornis (Kirby, 1802, Melitta)	APOIDEA	Andrenidae	Andreninae		Andrena		picicornis	(Kirby, 1802, Melitta)
Acu	946	invalid	species	pilosula (Kirby, 1802, Melitta)	APOIDEA	Andrenidae	Andreninae		Andrena		pilosula	(Kirby, 1802, Melitta)
Acu	947	invalid	species	gwynana (Kirby, 1802, Melitta)	APOIDEA	Andrenidae	Andreninae		Andrena		gwynana	(Kirby, 1802, Melitta)
Acu	948	invalid	species	proxima Smith, 1847 preocc.	APOIDEA	Andrenidae	Andreninae		Andrena		proxima	Smith, 1847 preocc.
Acu	949	invalid	species	aestiva Smith, 1849	APOIDEA	Andrenidae	Andreninae		Andrena		aestiva	Smith, 1849
Acu	950	invalid	species	consimilis Smith, 1849 preocc.	APOIDEA	Andrenidae	Andreninae		Andrena		consimilis	Smith, 1849 preocc.
Acu	951	valid	species	ruficrus Nylander, 1848	APOIDEA	Andrenidae	Andreninae		Andrena		ruficrus	Nylander, 1848		England, Scotland
Acu	953	valid	subgenus	HOLANDRENA Pérez, 1890	APOIDEA	Andrenidae	Andreninae		Andrena	Holandrena		Pérez, 1890
Acu	954	valid	species	labialis (Kirby, 1802, Melitta)	APOIDEA	Andrenidae	Andreninae		Andrena	Holandrena	labialis	(Kirby, 1802)		England, Wales, Isle of Man	Melitta
Acu	955	invalid	species	separata Smith, 1847	APOIDEA	Andrenidae	Andreninae		Andrena	Holandrena	separata	Smith, 1847
Acu	957	valid	subgenus	HOPLANDRENA Pérez, 1890	APOIDEA	Andrenidae	Andreninae		Andrena	Hoplandrena		Pérez, 1890
Acu	958	valid	species	bucephala Stephens, 1846	APOIDEA	Andrenidae	Andreninae		Andrena	Hoplandrena	bucephala	Stephens, 1846		England, Wales
Acu	959	invalid	species	eximia Smith, 1847	APOIDEA	Andrenidae	Andreninae		Andrena	Hoplandrena	eximia	Smith, 1847
Acu	960	invalid	species	longipes Smith, 1847	APOIDEA	Andrenidae	Andreninae		Andrena	Hoplandrena	longipes	Smith, 1847
Acu	961	valid	species	ferox Smith, 1847	APOIDEA	Andrenidae	Andreninae		Andrena	Hoplandrena	ferox	Smith, 1847		England
Acu	962	invalid	species	distincta Smith, 1847	APOIDEA	Andrenidae	Andreninae		Andrena	Hoplandrena	distincta	Smith, 1847
Acu	963	valid	species	rosae Panzer, 1801	APOIDEA	Andrenidae	Andreninae		Andrena	Hoplandrena	rosae	Panzer, 1801		England, Wales, Ireland
Acu	964	invalid	species	eximia misident.	APOIDEA	Andrenidae	Andreninae		Andrena	Hoplandrena	eximia	misident.
Acu	965	invalid	species	zonalis (Kirby, 1802, Melitta)	APOIDEA	Andrenidae	Andreninae		Andrena	Hoplandrena	zonalis	(Kirby, 1802, Melitta)
Acu	966	invalid	species	stragulata Illiger, 1806	APOIDEA	Andrenidae	Andreninae		Andrena	Hoplandrena	stragulata	Illiger, 1806	#N/A
Acu	967	invalid	species	strangulata misspelling	APOIDEA	Andrenidae	Andreninae		Andrena	Hoplandrena	strangulata	misspelling
Acu	968	valid	species	scotica Perkins, 1916	APOIDEA	Andrenidae	Andreninae		Andrena	Hoplandrena	scotica	Perkins, 1916	Although usually referred to as scotica in Britain (e.g. Else et al., 2004), Schwarz et al. (1996) and Gusenleitner & Schwarz (2002a) have treated scotica as a synonym of carantonica Peréz, 1916; however, Else (in prep.), following P. Westrich’s (in lit.) interpretation of the type of carantonica, regards this is a separate species, with carantonica a junior synonym of trimmerana.	England, Scotland, Wales, Ireland, Isle of Man
Acu	969	invalid	species	carantonica misident.	APOIDEA	Andrenidae	Andreninae		Andrena	Hoplandrena	carantonica	misident.
Acu	970	invalid	species	jacobi Perkins, 1921	APOIDEA	Andrenidae	Andreninae		Andrena	Hoplandrena	jacobi	Perkins, 1921
Acu	971	invalid	species	johnsoni Perkins, 1921	APOIDEA	Andrenidae	Andreninae		Andrena	Hoplandrena	johnsoni	Perkins, 1921
Acu	972	valid	species	trimmerana (Kirby, 1802, Melitta)	APOIDEA	Andrenidae	Andreninae		Andrena	Hoplandrena	trimmerana	(Kirby, 1802)		England, Wales	Melitta
Acu	973	invalid	species	spinigera (Kirby, 1802, Melitta)	APOIDEA	Andrenidae	Andreninae		Andrena	Hoplandrena	spinigera	(Kirby, 1802, Melitta)
Acu	974	invalid	species	carantonica Peréz, 1916	APOIDEA	Andrenidae	Andreninae		Andrena	Hoplandrena	carantonica	Peréz, 1916
Acu	976	valid	subgenus	LEUCANDRENA Hedicke, 1933	APOIDEA	Andrenidae	Andreninae		Andrena	Leucandrena		Hedicke, 1933
Acu	977	valid	species	argentata Smith, 1844	APOIDEA	Andrenidae	Andreninae		Andrena	Leucandrena	argentata	Smith, 1844		England
Acu	978	valid	species	barbilabris (Kirby, 1802, Melitta)	APOIDEA	Andrenidae	Andreninae		Andrena	Leucandrena	barbilabris	(Kirby, 1802)		England, Scotland, Wales, Ireland, Isle of Man	Melitta
Acu	979	invalid	species	sericea (Christ, 1791, Apis) preocc.	APOIDEA	Andrenidae	Andreninae		Andrena	Leucandrena	sericea	(Christ, 1791, Apis) preocc.
Acu	980	invalid	species	albicrus (Kirby, 1802, Melitta)	APOIDEA	Andrenidae	Andreninae		Andrena	Leucandrena	albicrus	(Kirby, 1802, Melitta)
Acu	982	valid	subgenus	MARGANDRENA Warncke, 1968	APOIDEA	Andrenidae	Andreninae		Andrena	Margandrena		Warncke, 1968
Acu	983	valid	species	marginata Fabricius, 1776	APOIDEA	Andrenidae	Andreninae		Andrena	Margandrena	marginata	Fabricius, 1776		England, Scotland, Wales, Ireland
Acu	984	invalid	species	cetii (Schrank, 1781, Apis)	APOIDEA	Andrenidae	Andreninae		Andrena	Margandrena	cetii	(Schrank, 1781, Apis)
Acu	985	invalid	species	schrankella (Kirby, 1802, Melitta)	APOIDEA	Andrenidae	Andreninae		Andrena	Margandrena	schrankella	(Kirby, 1802, Melitta)
Acu	986	invalid	species	frontalis Smith, 1849	APOIDEA	Andrenidae	Andreninae		Andrena	Margandrena	frontalis	Smith, 1849
Acu	988	valid	subgenus	MELANDRENA Pérez, 1890	APOIDEA	Andrenidae	Andreninae		Andrena	Melandrena		Pérez, 1890
Acu	989	invalid	genus	GYMNANDRENA Hedicke, 1933	APOIDEA	Andrenidae	Andreninae		GYMNANDRENA			Hedicke, 1933
Acu	990	invalid	genus	CRYPTANDRENA Lanham, 1949 preocc.	APOIDEA	Andrenidae	Andreninae		CRYPTANDRENA			Lanham, 1949
Acu	991	invalid	genus	BYTHANDRENA Lanham, 1950	APOIDEA	Andrenidae	Andreninae		BYTHANDRENA			Lanham, 1950
Acu	992	valid	species	cineraria (Linnaeus, 1758, Apis)	APOIDEA	Andrenidae	Andreninae		Andrena		cineraria	(Linnaeus, 1758)		England, Scotland, Wales, Ireland, Isle of Man	Apis
Acu	993	valid	species	nigroaenea (Kirby, 1802, Melitta)	APOIDEA	Andrenidae	Andreninae		Andrena		nigroaenea	(Kirby, 1802)	The population on the Isles of Scilly and Channel Islands has been described as the subspecies sarnia Richards, 1979.	England, Scotland, Wales, Ireland, Isle of Man	Melitta
Acu	994	invalid	species	aprilina Smith, 1848	APOIDEA	Andrenidae	Andreninae		Andrena		aprilina	Smith, 1848
Acu	995	valid	species	nitida (Müller, 1776, Apis)	APOIDEA	Andrenidae	Andreninae		Andrena		nitida	(Müller, 1776)		England, Wales, Ireland	Apis
Acu	996	invalid	species	pubescens Olivier, 1789	APOIDEA	Andrenidae	Andreninae		Andrena		pubescens	Olivier, 1789
Acu	997	invalid	species	consimilis Smith, 1847	APOIDEA	Andrenidae	Andreninae		Andrena		consimilis	Smith, 1847
Acu	998	valid	species	thoracica (Fabricius, 1775, Apis)	APOIDEA	Andrenidae	Andreninae		Andrena		thoracica	(Fabricius, 1775)		England, Wales	Apis
Acu	999	invalid	species	melanocephala (Kirby, 1802, Melitta)	APOIDEA	Andrenidae	Andreninae		Andrena		melanocephala	(Kirby, 1802, Melitta)
Acu	1000	valid	species	vaga Panzer, 1799 E	APOIDEA	Andrenidae	Andreninae		Andrena		vaga	Panzer, 1799	Probably extinct in Britain.	England
Acu	1002	valid	subgenus	MICRANDRENA Ashmead, 1899	APOIDEA	Andrenidae	Andreninae		Andrena	Micrandrena		Ashmead, 1899
Acu	1003	invalid	genus	ANDRENELLA Hedicke, 1933	APOIDEA	Andrenidae	Andreninae		ANDRENELLA			Hedicke, 1933
Acu	1004	valid	species	alfkenella Perkins, 1914	APOIDEA	Andrenidae	Andreninae		Andrena		alfkenella	Perkins, 1914		England
Acu	1005	invalid	species	moricella Perkins, 1914	APOIDEA	Andrenidae	Andreninae		Andrena		moricella	Perkins, 1914
Acu	1006	valid	species	falsifica Perkins, 1915	APOIDEA	Andrenidae	Andreninae		Andrena		falsifica	Perkins, 1915		England
Acu	1007	valid	species	floricola Eversmann, 1852	APOIDEA	Andrenidae	Andreninae		Andrena		floricola	Eversmann, 1852	Probably extinct in Britain.
Acu	1008	valid	species	minutula (Kirby, 1802, Melitta)	APOIDEA	Andrenidae	Andreninae		Andrena		minutula	(Kirby, 1802)		England, Wales, Ireland	Melitta
Acu	1009	invalid	species	parvula (Kirby, 1802, Melitta)	APOIDEA	Andrenidae	Andreninae		Andrena		parvula	(Kirby, 1802, Melitta)
Acu	1010	invalid	species	nigrifrons Smith, 1855 preocc.	APOIDEA	Andrenidae	Andreninae		Andrena		nigrifrons	Smith, 1855 preocc.
Acu	1011	valid	species	minutuloides Perkins, 1914	APOIDEA	Andrenidae	Andreninae		Andrena		minutuloides	Perkins, 1914		England
Acu	1012	invalid	species	parvuloides Perkins, 1914	APOIDEA	Andrenidae	Andreninae		Andrena		parvuloides	Perkins, 1914
Acu	1013	valid	species	nana (Kirby, 1802, Melitta)	APOIDEA	Andrenidae	Andreninae		Andrena		nana	(Kirby, 1802)	Probably extinct in Britain.	England	Melitta
Acu	1014	valid	species	nanula Nylander, 1848	APOIDEA	Andrenidae	Andreninae		Andrena		nanula	Nylander, 1848	Probably extinct in Britain.
Acu	1015	valid	species	niveata Friese, 1887	APOIDEA	Andrenidae	Andreninae		Andrena		niveata	Friese, 1887		England, Wales
Acu	1016	invalid	species	spreta misident.	APOIDEA	Andrenidae	Andreninae		Andrena		spreta	misident.
Acu	1017	valid	species	semilaevis Pérez, 1903	APOIDEA	Andrenidae	Andreninae		Andrena		semilaevis	Pérez, 1903		England, Scotland, Wales, Ireland, Isle of Man
Acu	1018	invalid	species	nana misident.	APOIDEA	Andrenidae	Andreninae		Andrena		nana	misident.
Acu	1019	invalid	species	saundersella Perkins, 1914	APOIDEA	Andrenidae	Andreninae		Andrena		saundersella	Perkins, 1914
Acu	1020	valid	species	subopaca Nylander, 1848	APOIDEA	Andrenidae	Andreninae		Andrena		subopaca	Nylander, 1848		England, Scotland, Wales, Ireland
Acu	1022	valid	subgenus	NOTANDRENA Pérez, 1890	APOIDEA	Andrenidae	Andreninae		Andrena	Notandrena		Pérez, 1890
Acu	1023	valid	species	chrysosceles (Kirby, 1802, Melitta)	APOIDEA	Andrenidae	Andreninae		Andrena	Notandrena	chrysosceles	(Kirby, 1802)		England, Scotland, Wales	Melitta
Acu	1024	invalid	species	connectens (Kirby, 1802, Melitta)	APOIDEA	Andrenidae	Andreninae		Andrena	Notandrena	connectens	(Kirby, 1802, Melitta)
Acu	1025	valid	species	nitidiuscula Schenck, 1853	APOIDEA	Andrenidae	Andreninae		Andrena	Notandrena	nitidiuscula	Schenck, 1853		England
Acu	1026	invalid	species	lucens Imhoff, 1868	APOIDEA	Andrenidae	Andreninae		Andrena	Notandrena	lucens	Imhoff, 1868
Acu	1028	valid	subgenus	OREOMELISSA Hirashima & Tadauchi, 1975	APOIDEA	Andrenidae	Andreninae		Andrena	Oreomelissa		Hirashima & Tadauchi, 1975
Acu	1029	valid	species	coitana (Kirby, 1802, Melitta)	APOIDEA	Andrenidae	Andreninae		Andrena	Oreomelissa	coitana	(Kirby, 1802)		England, Scotland, Wales, Ireland, Isle of Man	Melitta
Acu	1030	invalid	species	shawella (Kirby, 1802, Melitta)	APOIDEA	Andrenidae	Andreninae		Andrena	Oreomelissa	shawella	(Kirby, 1802, Melitta)
Acu	1032	valid	subgenus	PLASTANDRENA Hedicke, 1933	APOIDEA	Andrenidae	Andreninae		Andrena	Plastandrena		Hedicke, 1933
Acu	1033	invalid	genus	SCHIZANDRENA Hedicke, 1933	APOIDEA	Andrenidae	Andreninae		SCHIZANDRENA			Hedicke, 1933
Acu	1034	invalid	genus	GLYPHANDRENA Hedicke, 1933	APOIDEA	Andrenidae	Andreninae		GLYPHANDRENA			Hedicke, 1933
Acu	1035	invalid	genus	MITSUKURIELLA Hirashima & LaBerge, 1965	APOIDEA	Andrenidae	Andreninae		MITSUKURIELLA			Hirashima & LaBerge, 1965
Acu	1036	invalid	genus	MITSUKURIAPIS Hirashima, LaBerge & Ikudome 1994	APOIDEA	Andrenidae	Andreninae		MITSUKURIAPIS			Hirashima, LaBerge & Ikudomem 1884
Acu	1037	valid	species	bimaculata (Kirby, 1802, Melitta)	APOIDEA	Andrenidae	Andreninae		Andrena		bimaculata	(Kirby, 1802)		England, Wales	Melitta
Acu	1038	invalid	species	articulata Smith, 1847	APOIDEA	Andrenidae	Andreninae		Andrena		articulata	Smith, 1847
Acu	1039	invalid	species	conjuncta Smith, 1847	APOIDEA	Andrenidae	Andreninae		Andrena		conjuncta	Smith, 1847
Acu	1040	invalid	species	decorata Smith, 1847	APOIDEA	Andrenidae	Andreninae		Andrena		decorata	Smith, 1847
Acu	1041	invalid	species	vitrea Smith, 1847	APOIDEA	Andrenidae	Andreninae		Andrena		vitrea	Smith, 1847
Acu	1042	valid	species	nigrospina Thomson, 1872	APOIDEA	Andrenidae	Andreninae		Andrena		nigrospina	Thomson, 1872	Although treated as a synonym of pilipes by Gusenleitner & Schwarz (2002a) here nigrospina is treated as a valid species, following Baker (1994).	England
Acu	1043	valid	species	pilipes Fabricius, 1781	APOIDEA	Andrenidae	Andreninae		Andrena		pilipes	Fabricius, 1781		England
Acu	1044	invalid	species	carbonaria misident.	APOIDEA	Andrenidae	Andreninae		Andrena		carbonaria	misident.
Acu	1045	invalid	species	spectabilis Smith, 1853	APOIDEA	Andrenidae	Andreninae		Andrena		spectabilis	Smith, 1853
Acu	1046	invalid	species	praetexta Smith, 1872	APOIDEA	Andrenidae	Andreninae		Andrena		praetexta	Smith, 1872
Acu	1047	valid	species	tibialis (Kirby, 1802, Melitta)	APOIDEA	Andrenidae	Andreninae		Andrena		tibialis	(Kirby, 1802)		England	Melitta
Acu	1048	invalid	species	mouffetella (Kirby, 1802, Melitta)	APOIDEA	Andrenidae	Andreninae		Andrena		mouffetella	(Kirby, 1802, Melitta)
Acu	1049	invalid	species	atriceps (Kirby, 1802, Melitta)	APOIDEA	Andrenidae	Andreninae		Andrena		atriceps	(Kirby, 1802, Melitta)
Acu	1051	valid	subgenus	POECILANDRENA Hedicke, 1933	APOIDEA	Andrenidae	Andreninae		Andrena	Poecilandrena		Hedicke, 1933
Acu	1052	valid	species	labiata Fabricius, 1781	APOIDEA	Andrenidae	Andreninae		Andrena	Poecilandrena	labiata	Fabricius, 1781		England, Wales, Ireland
Acu	1053	invalid	species	cingulata misident.	APOIDEA	Andrenidae	Andreninae		Andrena	Poecilandrena	cingulata	misident.
Acu	1055	valid	subgenus	POLIANDRENA Warncke, 1968	APOIDEA	Andrenidae	Andreninae		Andrena	Poliandrena		Warncke, 1968
Acu	1056	valid	species	florea Fabricius, 1793	APOIDEA	Andrenidae	Andreninae		Andrena	Poliandrena	florea	Fabricius, 1793		England
Acu	1057	invalid	species	rubricata Smith, 1847	APOIDEA	Andrenidae	Andreninae		Andrena	Poliandrena	rubricata	Smith, 1847
Acu	1058	valid	species	polita Smith, 1847 E	APOIDEA	Andrenidae	Andreninae		Andrena	Poliandrena	polita	Smith, 1847	Probably extinct in Britain.	England
Acu	1060	valid	subgenus	PROXIANDRENA Schmid-Egger, 2005	APOIDEA	Andrenidae	Andreninae		Andrena	Proxiandrena		Schmid-Egger, 2005
Acu	1061	valid	species	proxima (Kirby, 1802, Melitta)	APOIDEA	Andrenidae	Andreninae		Andrena	Proxiandrena	proxima	(Kirby, 1802)		England, Wales	Melitta
Acu	1062	invalid	species	digitalis (Kirby, 1802, Melitta)	APOIDEA	Andrenidae	Andreninae		Andrena	Proxiandrena	digitalis	(Kirby, 1802, Melitta)
Acu	1064	valid	subgenus	PTILANDRENA Robertson, 1902	APOIDEA	Andrenidae	Andreninae		Andrena	Ptilandrena		Robertson, 1902
Acu	1065	invalid	genus	EREMANDRENA LaBerge, 1964	APOIDEA	Andrenidae	Andreninae		EREMANDRENA			LaBerge, 1964
Acu	1066	valid	species	angustior (Kirby, 1802, Melitta)	APOIDEA	Andrenidae	Andreninae		Andrena		angustior	(Kirby, 1802)		England, Scotland, Wales, Ireland, Isle of Man	Melitta
Acu	1067	invalid	species	lacinia Smith, 1847	APOIDEA	Andrenidae	Andreninae		Andrena		lacinia	Smith, 1847
Acu	1069	valid	subgenus	SIMANDRENA Pérez, 1890	APOIDEA	Andrenidae	Andreninae		Andrena	Simandrena		Pérez, 1890
Acu	1070	invalid	genus	PLATANDRENA Viereck, 1924	APOIDEA	Andrenidae	Andreninae		PLATANDRENA			Viereck, 1924
Acu	1071	invalid	genus	STENANDRENA Timberlake, 1949	APOIDEA	Andrenidae	Andreninae		STENANDRENA			Timberlake, 1949
Acu	1072	valid	species	congruens Schmiedeknecht, 1884	APOIDEA	Andrenidae	Andreninae		Andrena		congruens	Schmiedeknecht, 1884		England, Wales
Acu	1073	invalid	species	confinis Stöckhert, 1930	APOIDEA	Andrenidae	Andreninae		Andrena		confinis	Stöckhert, 1930
Acu	1074	valid	species	dorsata (Kirby, 1802, Melitta)	APOIDEA	Andrenidae	Andreninae		Andrena		dorsata	(Kirby, 1802)		England, Wales	Melitta
Acu	1075	invalid	species	collinsonana (Kirby, 1802, Melitta)	APOIDEA	Andrenidae	Andreninae		Andrena		collinsonana	(Kirby, 1802, Melitta)
Acu	1076	invalid	species	lewinella (Kirby, 1802, Melitta)	APOIDEA	Andrenidae	Andreninae		Andrena		lewinella	(Kirby, 1802, Melitta)
Acu	1077	invalid	species	nudiuscula (Kirby, 1802, Melitta)	APOIDEA	Andrenidae	Andreninae		Andrena		nudiuscula	(Kirby, 1802, Melitta)
Acu	1078	invalid	species	subincana (Kirby, 1802, Melitta)	APOIDEA	Andrenidae	Andreninae		Andrena		subincana	(Kirby, 1802, Melitta)
Acu	1079	valid	species	lepida Schenck, 1861	APOIDEA	Andrenidae	Andreninae		Andrena		lepida	Schenck, 1861		England
Acu	1081	valid	subgenus	TAENIANDRENA Hedicke, 1933	APOIDEA	Andrenidae	Andreninae		Andrena	Taeniandrena		Hedicke, 1933
Acu	1082	valid	species	lathyri Alfken, 1899	APOIDEA	Andrenidae	Andreninae		Andrena	Taeniandrena	lathyri	Alfken, 1899		England
Acu	1083	valid	species	ovatula (Kirby, 1802, Melitta)	APOIDEA	Andrenidae	Andreninae		Andrena	Taeniandrena	ovatula	(Kirby, 1802)		England, Wales	Melitta
Acu	1084	invalid	species	afzeliella (Kirby, 1802, Melitta)	APOIDEA	Andrenidae	Andreninae		Andrena	Taeniandrena	afzeliella	(Kirby, 1802, Melitta)
Acu	1085	invalid	species	barbata (Kirby, 1802, Melitta)	APOIDEA	Andrenidae	Andreninae		Andrena	Taeniandrena	barbata	(Kirby, 1802, Melitta)
Acu	1086	invalid	species	fuscata (Kirby, 1802, Melitta)	APOIDEA	Andrenidae	Andreninae		Andrena	Taeniandrena	fuscata	(Kirby, 1802, Melitta)
Acu	1087	invalid	species	picipes (Kirby, 1802, Melitta)	APOIDEA	Andrenidae	Andreninae		Andrena	Taeniandrena	picipes	(Kirby, 1802, Melitta)
Acu	1088	invalid	species	albofasciata Thomson, 1870	APOIDEA	Andrenidae	Andreninae		Andrena	Taeniandrena	albofasciata	Thomson, 1870
Acu	1089	valid	species	similis Smith, 1849	APOIDEA	Andrenidae	Andreninae		Andrena	Taeniandrena	similis	Smith, 1849		England, Scotland, Wales
Acu	1090	invalid	species	?ocreata Christ, 1791 nom. dub.	APOIDEA	Andrenidae	Andreninae		Andrena	Taeniandrena	?ocreata	Christ, 1791 nom. dub.
Acu	1091	valid	species	wilkella (Kirby, 1802, Melitta)	APOIDEA	Andrenidae	Andreninae		Andrena	Taeniandrena	wilkella	(Kirby, 1802)		England, Scotland, Wales, Ireland, Isle of Man	Melitta
Acu	1092	invalid	species	barbatula (Kirby, 1802, Melitta)	APOIDEA	Andrenidae	Andreninae		Andrena	Taeniandrena	barbatula	(Kirby, 1802, Melitta)
Acu	1093	invalid	species	convexiuscula (Kirby, 1802, Melitta)	APOIDEA	Andrenidae	Andreninae		Andrena	Taeniandrena	convexiuscula	(Kirby, 1802, Melitta)
Acu	1094	invalid	species	xanthura (Kirby, 1802, Melitta)	APOIDEA	Andrenidae	Andreninae		Andrena	Taeniandrena	xanthura	(Kirby, 1802, Melitta)
Acu	1096	valid	subgenus	TARSANDRENA Osytshnjuk, 1984	APOIDEA	Andrenidae	Andreninae		Andrena	Tarsandrena		Osytshnjuk, 1984
Acu	1097	valid	species	tarsata Nylander, 1848	APOIDEA	Andrenidae	Andreninae		Andrena	Tarsandrena	tarsata	Nylander, 1848		England, Scotland, Wales, Ireland, Isle of Man
Acu	1098	invalid	species	analis misident.	APOIDEA	Andrenidae	Andreninae		Andrena	Tarsandrena	analis	misident.
Acu	1100	valid	subgenus	TRACHANDRENA Robertson, 1902	APOIDEA	Andrenidae	Andreninae		Andrena	Trachandrena		Robertson, 1902
Acu	1101	valid	species	haemorrhoa (Fabricius, 1781, Apis)	APOIDEA	Andrenidae	Andreninae		Andrena	Trachandrena	haemorrhoa	(Fabricius, 1781)		England, Scotland, Wales, Ireland, Isle of Man	Apis
Acu	1102	invalid	species	albicans misident.	APOIDEA	Andrenidae	Andreninae		Andrena	Trachandrena	albicans	misident.
Acu	1104	valid	subgenus	ZONANDRENA Hedicke, 1933	APOIDEA	Andrenidae	Andreninae		Andrena	Zonandrena		Hedicke, 1933
Acu	1105	valid	species	flavipes Panzer, 1799	APOIDEA	Andrenidae	Andreninae		Andrena	Zonandrena	flavipes	Panzer, 1799		England, Wales, Ireland
Acu	1106	invalid	species	contigua (Kirby, 1802, Melitta)	APOIDEA	Andrenidae	Andreninae		Andrena	Zonandrena	contigua	(Kirby, 1802, Melitta)
Acu	1107	invalid	species	fulvicrus (Kirby, 1802, Melitta)	APOIDEA	Andrenidae	Andreninae		Andrena	Zonandrena	fulvicrus	(Kirby, 1802, Melitta)
Acu	1108	invalid	species	extricata Smith, 1849	APOIDEA	Andrenidae	Andreninae		Andrena	Zonandrena	extricata	Smith, 1849
Acu	1109	valid	species	gravida Imhoff, 1832	APOIDEA	Andrenidae	Andreninae		Andrena	Zonandrena	gravida	Imhoff, 1832		England
Acu	1110	invalid	species	fasciata Nylander, 1852 preocc.	APOIDEA	Andrenidae	Andreninae		Andrena	Zonandrena	fasciata	Nylander, 1852 preocc.
Acu	1111	invalid	species	picicrus Schenck, 1853	APOIDEA	Andrenidae	Andreninae		Andrena	Zonandrena	picicrus	Schenck, 1853
Acu	1113	valid	Subfamily	PANURGINAE Leach, 1815	APOIDEA	Andrenidae	Panurginae					Leach, 1815
Acu	1115	valid	tribe	PANURGINI Leach, 1815	APOIDEA	Andrenidae	PANURGINAE	Panurgini				Leach, 1815
Acu	1117	valid	genus	PANURGUS Panzer, 1806	APOIDEA	Andrenidae	PANURGINAE	Panurgini	Panurgus			Panzer, 1806
Acu	1118	valid	species	banksianus (Kirby, 1802, Apis)	APOIDEA	Andrenidae	PANURGINAE	Panurgini	Panurgus		banksianus	(Kirby, 1802)		England, Wales	Apis
Acu	1119	invalid	species	ursinus misident.	APOIDEA	Andrenidae	PANURGINAE	Panurgini	Panurgus		ursinus	misident.
Acu	1120	valid	species	calcaratus (Scopoli, 1763, Apis)	APOIDEA	Andrenidae	PANURGINAE	Panurgini	Panurgus		calcaratus	(Scopoli, 1763)		England, Wales	Apis
Acu	1121	invalid	species	linnaeella (Kirby, 1802, Apis)	APOIDEA	Andrenidae	PANURGINAE	Panurgini	Panurgus		linnaeella	(Kirby, 1802, Apis)
Acu	1123	valid	Family	Apidae Latreille, 1802	APOIDEA	Apidae						Latreille, 1802
Acu	1125	invalid	Subfamily	Apinae Latreille, 1802	APOIDEA	Apidae	Apinae					Latreille, 1802
Acu	1127	valid	tribe	ANTHOPHORINI Dahlbom, 1835	APOIDEA	Apidae	Apinae	Anthophorini				Dahlbom, 1835
Acu	1129	valid	genus	ANTHOPHORA Latreille, 1803	APOIDEA	Apidae	Apinae	Anthophorini	Anthophora			Latreille, 1803
Acu	1130	valid	subgenus	ANTHOPHORA Latreille, 1803	APOIDEA	Apidae	Apinae	Anthophorini	Anthophora	Anthophora		Latreille, 1803
Acu	1131	valid	species	plumipes (Pallas, 1772, Apis)	APOIDEA	Apidae	Apinae	Anthophorini	Anthophora	Anthophora	plumipes	(Pallas, 1772)		England, Wales	Apis
Acu	1132	invalid	species	acervorum misident.	APOIDEA	Apidae	Apinae	Anthophorini	Anthophora	Anthophora	acervorum	misident.
Acu	1133	invalid	species	pilipes (Fabricius, 1775, Apis)	APOIDEA	Apidae	Apinae	Anthophorini	Anthophora	Anthophora	pilipes	(Fabricius, 1775, Apis)
Acu	1135	valid	subgenus	CLISODON Patton, 1879	APOIDEA	Apidae	Apinae	Anthophorini	Anthophora	Clisodon		Patton, 1879
Acu	1136	valid	species	furcata (Panzer, 1798, Apis)	APOIDEA	Apidae	Apinae	Anthophorini	Anthophora	Clisodon	furcata	(Panzer, 1798)		England, Scotland, Wales	Apis
Acu	1138	valid	subgenus	DASYMEGILLA Brooks, 1988	APOIDEA	Apidae	Apinae	Anthophorini	Anthophora	Dasymegilla		Brooks, 1988
Acu	1139	valid	species	quadrimaculata (Panzer, 1798, Apis)	APOIDEA	Apidae	Apinae	Anthophorini	Anthophora	Dasymegilla	quadrimaculata	(Panzer, 1798)		England, Wales	Apis
Acu	1140	invalid	species	subglobosa (Kirby, 1802, Apis)	APOIDEA	Apidae	Apinae	Anthophorini	Anthophora	Dasymegilla	subglobosa	(Kirby, 1802, Apis)
Acu	1142	valid	subgenus	HELIOPHILA Klug, 1807	APOIDEA	Apidae	Apinae	Anthophorini	Anthophora	Heliophila		Klug, 1807
Acu	1143	invalid	genus	SAROPODA Latreille, 1809	APOIDEA	Apidae	Apinae	Anthophorini	SAROPODA			Latreille, 1809
Acu	1144	valid	species	bimaculata (Panzer, 1798, Apis)	APOIDEA	Apidae	Apinae	Anthophorini	Anthophora		bimaculata	(Panzer, 1798)		England, Ireland	Apis
Acu	1146	valid	subgenus	PYGANTHOPHORA Brooks, 1988	APOIDEA	Apidae	Apinae	Anthophorini	Anthophora	Pyganthophora		Brooks, 1988
Acu	1147	valid	species	retusa (Linnaeus, 1758, Apis)	APOIDEA	Apidae	Apinae	Anthophorini	Anthophora	Pyganthophora	retusa	(Linnaeus, 1758)		England	Apis
Acu	1148	invalid	species	haworthana (Kirby, 1802, Apis)	APOIDEA	Apidae	Apinae	Anthophorini	Anthophora	Pyganthophora	haworthana	(Kirby, 1802, Apis)
Acu	1149	invalid	species	pennipes (Kirby, 1802, Apis)	APOIDEA	Apidae	Apinae	Anthophorini	Anthophora	Pyganthophora	pennipes	(Kirby, 1802, Apis)
Acu	1151	valid	tribe	ApinI Latreille, 1802	APOIDEA	Apidae	Apinae	Apini				Latreille, 1802
Acu	1153	valid	genus	APIS Linnaeus, 1758	APOIDEA	Apidae	Apinae	Apini	Apis			Linnaeus, 1758
Acu	1154	valid	species	mellifera Linnaeus, 1758	APOIDEA	Apidae	Apinae	Apini	Apis		mellifera	Linnaeus, 1758	There have been various subspecies names proposed for honey bees, with the supposedly native north west European population being A. mellifera mellifera. See Engel (1999) for a full taxonomy of Apis mellifera.	England, Scotland, Wales, Ireland, Isle of Man
Acu	1155	invalid	species	mellifica Linnaeus, 1761	APOIDEA	Apidae	Apinae	Apini	Apis		mellifica	Linnaeus, 1761
Acu	1157	valid	tribe	BOMBINI Latreille, 1802	APOIDEA	Apidae	Apinae	Bombini				Latreille, 1802
Acu	1159	valid	genus	BOMBUS Latreille, 1802	APOIDEA	Apidae	Apinae	Bombini	Bombus			Latreille, 1802	Various subspecific names have been used for British Bombus but these are generally poorly justified and we have treated these as synonymous here. Subgeneric classification follows Williams et al. (2008).
Acu	1160	valid	subgenus	BOMBUS Latreille, 1802	APOIDEA	Apidae	Apinae	Bombini	Bombus	Bombus		Latreille, 1802	Full synonymy for this subgenus is given by Williams et al. (2012), who shed some light on the confusing classification of cryptarum and magnus relative to lucorum.
Acu	1161	invalid	genus	TERRESTRIBOMBUS Vogt, 1911	APOIDEA	Apidae	Apinae	Bombini	TERRESTRIBOMBUS			Vogt, 1911
Acu	1162	valid	species	cryptarum (Fabricius, 1775, Apis)	APOIDEA	Apidae	Apinae	Bombini	Bombus		cryptarum	(Fabricius, 1775)	added by Bertsch et al. (2005)	Scotland, Ireland	Apis
Acu	1163	valid	species	lucorum (Linnaeus, 1761, Apis)	APOIDEA	Apidae	Apinae	Bombini	Bombus		lucorum	(Linnaeus, 1761)		England, Scotland, Wales, Ireland, Isle of Man	Apis
Acu	1164	valid	species	magnus Vogt, 1911	APOIDEA	Apidae	Apinae	Bombini	Bombus		magnus	Vogt, 1911		Scotland, Ireland
Acu	1165	valid	species	terrestris (Linnaeus, 1758, Apis)	APOIDEA	Apidae	Apinae	Bombini	Bombus		terrestris	(Linnaeus, 1758)		England, Scotland, Wales, Ireland, Isle of Man	Apis
Acu	1166	invalid	species	audax (Harris, 1776, Apis)	APOIDEA	Apidae	Apinae	Bombini	Bombus		audax	(Harris, 1776, Apis)
Acu	1168	valid	subgenus	CULLUMANOBOMBUS Vogt, 1911	APOIDEA	Apidae	Apinae	Bombini	Bombus	Cullumanobombus		Vogt, 1911
Acu	1169	valid	species	cullumanus (Kirby, 1802, Apis)	APOIDEA	Apidae	Apinae	Bombini	Bombus	Cullumanobombus	cullumanus	(Kirby, 1802)	Extinct in Britain since the 1940s.	England	Apis
Acu	1171	valid	subgenus	KALLOBOMBUS Dalla Torre, 1880	APOIDEA	Apidae	Apinae	Bombini	Bombus	Kallobombus		Dalla Torre, 1880
Acu	1172	valid	species	soroeensis (Fabricius, 1777, Apis)	APOIDEA	Apidae	Apinae	Bombini	Bombus	Kallobombus	soroeensis	(Fabricius, 1777)		England, Scotland, Wales	Apis
Acu	1174	valid	subgenus	MEGABOMBUS Dalla Torre, 1880	APOIDEA	Apidae	Apinae	Bombini	Bombus	Megabombus		Dalla Torre, 1880
Acu	1175	invalid	genus	HORTOBOMBUS Vogt, 1911	APOIDEA	Apidae	Apinae	Bombini	HORTOBOMBUS			Vogt, 1911
Acu	1176	valid	species	hortorum (Linnaeus, 1761, Apis)	APOIDEA	Apidae	Apinae	Bombini	Bombus		hortorum	(Linnaeus, 1761)		England, Scotland, Wales, Ireland, Isle of Man	Apis
Acu	1177	invalid	species	?flavonigrescens Smith, 1846	APOIDEA	Apidae	Apinae	Bombini	Bombus		?flavonigrescens	Smith, 1846
Acu	1178	invalid	species	ivernicus Sladen, 1912	APOIDEA	Apidae	Apinae	Bombini	Bombus		ivernicus	Sladen, 1912	Populations in Ireland have been referred to the subspecies B. hortorum ivernicus.
Acu	1179	invalid	species	splendida Stelfox, 1938	APOIDEA	Apidae	Apinae	Bombini	Bombus		splendida	Stelfox, 1938
Acu	1180	valid	species	ruderatus (Fabricius, 1775, Apis)	APOIDEA	Apidae	Apinae	Bombini	Bombus		ruderatus	(Fabricius, 1775)		England	Apis
Acu	1181	invalid	species	perniger (Harris, 1776, Apis)	APOIDEA	Apidae	Apinae	Bombini	Bombus		perniger	(Harris, 1776, Apis)	English populations have been referred to the subspecies B. ruderatus perniger.
Acu	1182	invalid	species	harrisellus (Kirby, 1802, Apis)	APOIDEA	Apidae	Apinae	Bombini	Bombus		harrisellus	(Kirby, 1802, Apis)
Acu	1183	invalid	species	tunstallanus (Kirby, 1802, Apis)	APOIDEA	Apidae	Apinae	Bombini	Bombus		tunstallanus	(Kirby, 1802, Apis)
Acu	1185	valid	subgenus	MELANOBOMBUS Dalla Torre, 1880	APOIDEA	Apidae	Apinae	Bombini	Bombus	Melanobombus		Dalla Torre, 1880
Acu	1186	invalid	genus	LAPIDARIOBOMBUS Vogt, 1911	APOIDEA	Apidae	Apinae	Bombini	LAPIDARIOBOMBUS			Vogt, 1911
Acu	1187	valid	species	lapidarius (Linnaeus, 1758, Apis)	APOIDEA	Apidae	Apinae	Bombini	Bombus		lapidarius	(Linnaeus, 1758)		England, Scotland, Wales, Ireland, Isle of Man	Apis
Acu	1189	valid	subgenus	PSITHYRUS Lepeletier, 1832	APOIDEA	Apidae	Apinae	Bombini	Bombus	Psithyrus		Lepeletier, 1832
Acu	1190	invalid	genus	ALLOPSITHYRUS Popov, 1931	APOIDEA	Apidae	Apinae	Bombini	ALLOPSITHYRUS			Popov, 1931
Acu	1191	invalid	genus	ASHTONIPSITHYRUS Frison, 1927	APOIDEA	Apidae	Apinae	Bombini	ASHTONIPSITHYRUS			Frison, 1927
Acu	1192	invalid	genus	FERNALDAEPSITHYRUS Frison, 1927	APOIDEA	Apidae	Apinae	Bombini	FERNALDAEPSITHYRUS			Frison, 1927
Acu	1193	invalid	genus	METAPSITHYRUS Popov, 1931	APOIDEA	Apidae	Apinae	Bombini	METAPSITHYRUS			Popov, 1931
Acu	1194	valid	species	barbutellus (Kirby, 1802, Apis)	APOIDEA	Apidae	Apinae	Bombini	Bombus		barbutellus	(Kirby, 1802)		England, Scotland, Wales, Ireland	Apis
Acu	1195	valid	species	bohemicus (Seidl, 1837, Apis)	APOIDEA	Apidae	Apinae	Bombini	Bombus		bohemicus	(Seidl, 1837)		England, Scotland, Wales, Ireland, Isle of Man	Apis
Acu	1196	invalid	species	distinctus (Pérez, 1884, Psithyrus)	APOIDEA	Apidae	Apinae	Bombini	Bombus		distinctus	(Pérez, 1884, Psithyrus)
Acu	1197	valid	species	campestris (Panzer, 1801, Apis)	APOIDEA	Apidae	Apinae	Bombini	Bombus		campestris	(Panzer, 1801)		England, Scotland, Wales, Ireland, Isle of Man	Apis
Acu	1198	invalid	species	rossiellus (Kirby, 1802, Apis)	APOIDEA	Apidae	Apinae	Bombini	Bombus		rossiellus	(Kirby, 1802, Apis)
Acu	1199	invalid	species	leeanus (Kirby, 1802, Apis)	APOIDEA	Apidae	Apinae	Bombini	Bombus		leeanus	(Kirby, 1802, Apis)
Acu	1200	invalid	species	francisanus (Kirby, 1802, Apis)	APOIDEA	Apidae	Apinae	Bombini	Bombus		francisanus	(Kirby, 1802, Apis)
Acu	1201	invalid	species	swynnertoni (Richards, 1936, Psithyrus)	APOIDEA	Apidae	Apinae	Bombini	Bombus		swynnertoni	(Richards, 1936, Psithyrus)	Populations in Western Scotland have been referred to the subspecies B. campestris swynnertoni.
Acu	1202	valid	species	rupestris (Fabricius, 1793, Apis)	APOIDEA	Apidae	Apinae	Bombini	Bombus		rupestris	(Fabricius, 1793)		England, Wales, Ireland	Apis
Acu	1203	invalid	species	albinellus (Kirby, 1802, Apis)	APOIDEA	Apidae	Apinae	Bombini	Bombus		albinellus	(Kirby, 1802, Apis)
Acu	1204	valid	species	sylvestris (Lepeletier, 1832, Psithyrus)	APOIDEA	Apidae	Apinae	Bombini	Bombus		sylvestris	(Lepeletier, 1832)		England, Scotland, Wales, Ireland	Psithyrus
Acu	1205	invalid	species	quadricolor misident.	APOIDEA	Apidae	Apinae	Bombini	Bombus		quadricolor	misident.
Acu	1206	valid	species	vestalis (Geoffroy, 1785, Apis)	APOIDEA	Apidae	Apinae	Bombini	Bombus		vestalis	(Geoffroy, 1785)		England, Scotland, Wales, Ireland	Apis
Acu	1208	valid	subgenus	PYROBOMBUS Dalla Torre, 1880	APOIDEA	Apidae	Apinae	Bombini	Bombus	Pyrobombus		Dalla Torre, 1880
Acu	1209	invalid	genus	PRATOBOMBUS Vogt, 1911	APOIDEA	Apidae	Apinae	Bombini	PRATOBOMBUS			Vogt, 1911
Acu	1210	valid	species	hypnorum (Linnaeus, 1758, Apis)	APOIDEA	Apidae	Apinae	Bombini	Bombus		hypnorum	(Linnaeus, 1758)	added by Goulson & Williams (2001)	England	Apis
Acu	1211	valid	species	jonellus (Kirby, 1802, Apis)	APOIDEA	Apidae	Apinae	Bombini	Bombus		jonellus	(Kirby, 1802)		England, Scotland, Wales, Ireland, Isle of Man	Apis
Acu	1212	invalid	species	nivalis misident.	APOIDEA	Apidae	Apinae	Bombini	Bombus		nivalis	misident.
Acu	1213	invalid	species	scrimshiranus (Kirby, 1802, Apis)	APOIDEA	Apidae	Apinae	Bombini	Bombus		scrimshiranus	(Kirby, 1802, Apis)
Acu	1214	invalid	species	atrocorbiculosus Vogt, 1911	APOIDEA	Apidae	Apinae	Bombini	Bombus		atrocorbiculosus	Vogt, 1911
Acu	1215	invalid	species	hebridensis Wild, 1931	APOIDEA	Apidae	Apinae	Bombini	Bombus		hebridensis	Wild, 1931	The population on the Hebrides has been referred to the subspecies B. jonellus hebridensis.
Acu	1216	invalid	species	vogtii Richards, 1933 preocc.	APOIDEA	Apidae	Apinae	Bombini	Bombus		vogtii	Richards, 1933 preocc.
Acu	1217	invalid	species	monapiae Kruseman, 1953	APOIDEA	Apidae	Apinae	Bombini	Bombus		monapiae	Kruseman, 1953	The population on the Isle of Man has been referred to the subspecies B. jonellus monapiae.
Acu	1218	invalid	species	vogtianus Rasmont, 1983	APOIDEA	Apidae	Apinae	Bombini	Bombus		vogtianus	Rasmont, 1983	A replacement name for the preccupied vogtii; populations on the Shetlands have been referred to the subspecies B. jonellus vogtianus.
Acu	1219	valid	species	monticola Smith, 1849	APOIDEA	Apidae	Apinae	Bombini	Bombus		monticola	Smith, 1849		England, Scotland, Wales, Ireland, Isle of Man
Acu	1220	invalid	species	lapponicus misident.	APOIDEA	Apidae	Apinae	Bombini	Bombus		lapponicus	misident.
Acu	1221	invalid	species	scoticus Pittioni, 1942	APOIDEA	Apidae	Apinae	Bombini	Bombus		scoticus	Pittioni, 1942
Acu	1222	valid	species	pratorum (Linnaeus, 1761, Apis)	APOIDEA	Apidae	Apinae	Bombini	Bombus		pratorum	(Linnaeus, 1761)		England, Scotland, Wales, Ireland, Isle of Man	Apis
Acu	1223	invalid	species	subinterruptus (Kirby, 1802, Apis)	APOIDEA	Apidae	Apinae	Bombini	Bombus		subinterruptus	(Kirby, 1802, Apis)
Acu	1224	invalid	species	donovanella (Kirby, 1802, Apis)	APOIDEA	Apidae	Apinae	Bombini	Bombus		donovanella	(Kirby, 1802, Apis)
Acu	1225	invalid	species	burrellana (Kirby, 1802, Apis)	APOIDEA	Apidae	Apinae	Bombini	Bombus		burrellana	(Kirby, 1802, Apis)
Acu	1231	valid	subgenus	SUBTERRANEOBOMBUS Vogt, 1911	APOIDEA	Apidae	Apinae	Bombini	Bombus	Subterraneobombus		Vogt, 1911
Acu	1232	valid	species	distinguendus Morawitz, 1869	APOIDEA	Apidae	Apinae	Bombini	Bombus	Subterraneobombus	distinguendus	Morawitz, 1869		England, Scotland, Wales, Ireland, Isle of Man
Acu	1233	valid	species	subterraneus (Linnaeus, 1758, Apis)	APOIDEA	Apidae	Apinae	Bombini	Bombus	Subterraneobombus	subterraneus	(Linnaeus, 1758)	Extinct in Britain since the 1980s but an attempt is being made to reintroduce the species to southern England.	England, Wales	Apis
Acu	1234	invalid	species	collinus Smith, 1844	APOIDEA	Apidae	Apinae	Bombini	Bombus	Subterraneobombus	collinus	Smith, 1844
Acu	1235	invalid	species	latreillellus (Kirby, 1802, Apis)	APOIDEA	Apidae	Apinae	Bombini	Bombus	Subterraneobombus	latreillellus	(Kirby, 1802, Apis)	British populations have been referred to the subspecies B. subterraneus latreillellus whereas the introduced individuals from Sweden have been ascribed to the nominate subspecies.
Acu	1237	valid	subgenus	THORACOBOMBUS Dalla Torre, 1880	APOIDEA	Apidae	Apinae	Bombini	Bombus	Thoracobombus		Dalla Torre, 1880
Acu	1227	valid	subgenus	RHODOBOMBUS Dalla Torre, 1880	APOIDEA	Apidae	Apinae	Bombini	Bombus	Rhodobombus		Dalla Torre, 1880
Acu	1238	valid	species	humilis Illiger, 1806	APOIDEA	Apidae	Apinae	Bombini	Bombus	Thoracobombus	humilis	Illiger, 1806		England, Scotland, Wales, Isle of Man
Acu	1239	invalid	species	solstitialis Panzer, 1806	APOIDEA	Apidae	Apinae	Bombini	Bombus	Thoracobombus	solstitialis	Panzer, 1806
Acu	1240	invalid	species	helferanus Seidl, 1837	APOIDEA	Apidae	Apinae	Bombini	Bombus	Thoracobombus	helferanus	Seidl, 1837
Acu	1241	invalid	species	venustus Smith, 1876 preocc.	APOIDEA	Apidae	Apinae	Bombini	Bombus	Thoracobombus	venustus	Smith, 1876 preocc.
Acu	1242	invalid	species	anglicus Yarrow, 1978	APOIDEA	Apidae	Apinae	Bombini	Bombus	Thoracobombus	anglicus	Yarrow, 1978
Acu	1243	valid	species	muscorum (Linnaeus, 1758, Apis)	APOIDEA	Apidae	Apinae	Bombini	Bombus	Thoracobombus	muscorum	(Linnaeus, 1758)		England, Scotland, Wales, Ireland, Isle of Man	Apis
Acu	1244	invalid	species	arcticus misident.	APOIDEA	Apidae	Apinae	Bombini	Bombus	Thoracobombus	arcticus	misident.
Acu	1245	invalid	species	smithianus misident.	APOIDEA	Apidae	Apinae	Bombini	Bombus	Thoracobombus	smithianus	misident.
Acu	1246	invalid	species	pallidus Evans, 1901 preocc.	APOIDEA	Apidae	Apinae	Bombini	Bombus	Thoracobombus	pallidus	Evans, 1901 preocc.
Acu	1247	invalid	species	laevis Vogt, 1909	APOIDEA	Apidae	Apinae	Bombini	Bombus	Thoracobombus	laevis	Vogt, 1909
Acu	1248	invalid	species	sladeni Vogt, 1911	APOIDEA	Apidae	Apinae	Bombini	Bombus	Thoracobombus	sladeni	Vogt, 1911	Populations on the Irish mainland and southern England have been referred to the subspecies B. muscorum sladeni.
Acu	1249	invalid	species	allenellus Stelfox, 1933	APOIDEA	Apidae	Apinae	Bombini	Bombus	Thoracobombus	allenellus	Stelfox, 1933	The population on the Aran islands has been referred to the subspecies B. muscorum allenellus.
Acu	1250	invalid	species	orcadensis Richards, 1935	APOIDEA	Apidae	Apinae	Bombini	Bombus	Thoracobombus	orcadensis	Richards, 1935	The population on Orkney has been referred to the subspecies B. muscorum orcadensis.
Acu	1251	invalid	species	scyllonius Richards, 1935	APOIDEA	Apidae	Apinae	Bombini	Bombus	Thoracobombus	scyllonius	Richards, 1935	Populations on the Isles of Scilly have been referred to the subspecies B. muscorum scyllonius.
Acu	1252	invalid	species	celticus Yarrow, 1978	APOIDEA	Apidae	Apinae	Bombini	Bombus	Thoracobombus	celticus	Yarrow, 1978	Populations in mainland Scotland and Northern England have been referred to the subspecies B. muscorum celticus.
Acu	1253	invalid	species	agricolae Baker, 1996	APOIDEA	Apidae	Apinae	Bombini	Bombus	Thoracobombus	agricolae	Baker, 1996	Populations on the Shetland islands have been referred to the subspecies B. muscorum agricolae.
Acu	1254	valid	species	pascuorum (Scopoli, 1763, Apis)	APOIDEA	Apidae	Apinae	Bombini	Bombus	Thoracobombus	pascuorum	(Scopoli, 1763)		England, Scotland, Wales, Ireland, Isle of Man	Apis
Acu	1255	invalid	species	vulgo (Harris, 1776, Apis)	APOIDEA	Apidae	Apinae	Bombini	Bombus	Thoracobombus	vulgo	(Harris, 1776, Apis)	Populations in southern England and Wales have been referred to the subspecies B. pascuorum vulgo.
Acu	1256	invalid	species	agrorum (Fabricius, 1787, Apis) preocc.	APOIDEA	Apidae	Apinae	Bombini	Bombus	Thoracobombus	agrorum	(Fabricius, 1787, Apis) preocc.
Acu	1257	invalid	species	floralis (Gmelin, 1790, Apis)	APOIDEA	Apidae	Apinae	Bombini	Bombus	Thoracobombus	floralis	(Gmelin, 1790, Apis)	Populations in Ireland have been referred to the subspecies B. pascuorum floralis.
Acu	1258	invalid	species	francillonellus (Kirby, 1802, Apis)	APOIDEA	Apidae	Apinae	Bombini	Bombus	Thoracobombus	francillonellus	(Kirby, 1802, Apis)
Acu	1259	invalid	species	sowerbianus (Kirby, 1802, Apis)	APOIDEA	Apidae	Apinae	Bombini	Bombus	Thoracobombus	sowerbianus	(Kirby, 1802, Apis)
Acu	1260	invalid	species	beckwithella (Kirby, 1802, Apis)	APOIDEA	Apidae	Apinae	Bombini	Bombus	Thoracobombus	beckwithella	(Kirby, 1802, Apis)
Acu	1261	invalid	species	curtisellus (Kirby, 1802, Apis)	APOIDEA	Apidae	Apinae	Bombini	Bombus	Thoracobombus	curtisellus	(Kirby, 1802, Apis)
Acu	1262	invalid	species	forsterellus (Kirby, 1802, Apis)	APOIDEA	Apidae	Apinae	Bombini	Bombus	Thoracobombus	forsterellus	(Kirby, 1802, Apis)
Acu	1263	invalid	species	cognatus Stevens, 1846	APOIDEA	Apidae	Apinae	Bombini	Bombus	Thoracobombus	cognatus	Stevens, 1846
Acu	1264	invalid	species	smithianus White, 1851	APOIDEA	Apidae	Apinae	Bombini	Bombus	Thoracobombus	smithianus	White, 1851
Acu	1265	invalid	species	septentrionalis Vogt, 1909	APOIDEA	Apidae	Apinae	Bombini	Bombus	Thoracobombus	septentrionalis	Vogt, 1909	Populations in Scotland and Northern England have been referred to the subspecies B. pascuorum septentrionalis.
Acu	1229	valid	species	?pomorum (Panzer, 1805, Bremus) E	APOIDEA	Apidae	Apinae	Bombini	Bombus		?pomorum	(Panzer, 1805)	There is confusion surrounding the dates of capture of the supposedly British specimens of pomorum, collected near Deal in Kent (summarised by Alford, 1975).	England	Bremus
Acu	1266	valid	species	ruderarius (Müller, 1776, Apis)	APOIDEA	Apidae	Apinae	Bombini	Bombus	Thoracobombus	ruderarius	(Müller, 1776)		England, Scotland, Wales, Ireland	Apis
Acu	1267	invalid	species	derhamellus (Kirby, 1802, Apis)	APOIDEA	Apidae	Apinae	Bombini	Bombus	Thoracobombus	derhamellus	(Kirby, 1802, Apis)
Acu	1268	invalid	species	raiellus (Kirby, 1802, Apis)	APOIDEA	Apidae	Apinae	Bombini	Bombus	Thoracobombus	raiellus	(Kirby, 1802, Apis)
Acu	1269	valid	species	sylvarum (Linnaeus, 1761, Apis)	APOIDEA	Apidae	Apinae	Bombini	Bombus	Thoracobombus	sylvarum	(Linnaeus, 1761)		England, Scotland, Wales, Ireland	Apis
Acu	1270	invalid	species	nigrescens Pérez, 1879	APOIDEA	Apidae	Apinae	Bombini	Bombus	Thoracobombus	nigrescens	Pérez, 1879
Acu	1271	invalid	species	distinctus Vogt, 1909	APOIDEA	Apidae	Apinae	Bombini	Bombus	Thoracobombus	distinctus	Vogt, 1909
Acu	1273	valid	tribe	EUCERINI Latreille, 1802	APOIDEA	Apidae	Apinae	Eucerini				Latreille, 1802
Acu	1275	valid	genus	EUCERA Scopoli, 1770	APOIDEA	Apidae	Apinae	Eucerini	Eucera			Scopoli, 1770
Acu	1276	valid	subgenus	EUCERA Scopoli, 1770	APOIDEA	Apidae	Apinae	Eucerini	Eucera	Eucera		Scopoli, 1770
Acu	1277	valid	species	longicornis (Linnaeus, 1758, Apis)	APOIDEA	Apidae	Apinae	Eucerini	Eucera	Eucera	longicornis	(Linnaeus, 1758)		England, Wales	Apis
Acu	1278	invalid	species	linguaria (Fabricius, 1775, Apis)	APOIDEA	Apidae	Apinae	Eucerini	Eucera	Eucera	linguaria	(Fabricius, 1775, Apis)
Acu	1279	valid	species	nigrescens Pérez, 1879 E	APOIDEA	Apidae	Apinae	Eucerini	Eucera	Eucera	nigrescens	Pérez, 1879	Probably extinct in Britain.	England
Acu	1280	invalid	species	tuberculata misident. [?]	APOIDEA	Apidae	Apinae	Eucerini	Eucera	Eucera	tuberculata	misident. [?]
Acu	1282	valid	tribe	MELECTINI Westwood, 1840	APOIDEA	Apidae	Apinae	Melectini				Westwood, 1840
Acu	1284	valid	genus	MELECTA Latreille, 1802	APOIDEA	Apidae	Apinae	Melectini	Melecta			Latreille, 1802
Acu	1285	valid	species	albifrons (Forster, 1771, Apis)	APOIDEA	Apidae	Apinae	Melectini	Melecta		albifrons	(Forster, 1771)		England, Wales	Apis
Acu	1286	invalid	species	punctata (Fabricius, 1775, Apis)	APOIDEA	Apidae	Apinae	Melectini	Melecta		punctata	(Fabricius, 1775, Apis)
Acu	1287	invalid	species	armata (Panzer, 1799, Andrena) preocc.	APOIDEA	Apidae	Apinae	Melectini	Melecta		armata	(Panzer, 1799, Andrena) preocc.
Acu	1288	valid	species	luctuosa (Scopoli, 1770, Apis)	APOIDEA	Apidae	Apinae	Melectini	Melecta		luctuosa	(Scopoli, 1770)	Probably extinct in Britain.	England	Apis
Acu	1290	valid	Subfamily	NOMADINAE Latreille, 1802	APOIDEA	Apidae	Nomadinae					Latreille, 1802
Acu	1292	valid	tribe	EPEOLINI Roberston, 1903	APOIDEA	Apidae	NOMADINAE	Epeolini				Roberston, 1903
Acu	1294	valid	genus	EPEOLUS Latreille, 1802	APOIDEA	Apidae	NOMADINAE	Epeolini	Epeolus			Latreille, 1802
Acu	1295	valid	species	cruciger (Panzer, 1799, Nomada)	APOIDEA	Apidae	NOMADINAE	Epeolini	Epeolus		cruciger	(Panzer, 1799)		England, Wales	Nomada
Acu	1296	invalid	species	rufipes Thomson, 1870	APOIDEA	Apidae	NOMADINAE	Epeolini	Epeolus		rufipes	Thomson, 1870
Acu	1297	valid	species	variegatus (Linnaeus, 1758, Apis)	APOIDEA	Apidae	NOMADINAE	Epeolini	Epeolus		variegatus	(Linnaeus, 1758)		England, Wales, Scotland, Isle of Man	Apis
Acu	1298	invalid	species	notatus misident.	APOIDEA	Apidae	NOMADINAE	Epeolini	Epeolus		notatus	misident.
Acu	1299	invalid	species	productus Thomson, 1870	APOIDEA	Apidae	NOMADINAE	Epeolini	Epeolus		productus	Thomson, 1870
Acu	1301	valid	tribe	NOMADINI Latreille, 1802	APOIDEA	Apidae	NOMADINAE	Nomadini				Latreille, 1802
Acu	1303	valid	genus	NOMADA Scopoli, 1763	APOIDEA	Apidae	NOMADINAE	Nomadini	Nomada			Scopoli, 1763
Acu	1304	valid	species	argentata Herrich-Schäffer, 1839	APOIDEA	Apidae	NOMADINAE	Nomadini	Nomada		argentata	Herrich-Schäffer, 1839		England, Ireland
Acu	1305	invalid	species	atrata Smith, 1846	APOIDEA	Apidae	NOMADINAE	Nomadini	Nomada		atrata	Smith, 1846
Acu	1306	valid	species	armata Herrich-Schäffer, 1839	APOIDEA	Apidae	NOMADINAE	Nomadini	Nomada		armata	Herrich-Schäffer, 1839		England, Wales
Acu	1307	invalid	species	kirbyella Stephens, 1846	APOIDEA	Apidae	NOMADINAE	Nomadini	Nomada		kirbyella	Stephens, 1846
Acu	1308	valid	species	baccata Smith, 1844	APOIDEA	Apidae	NOMADINAE	Nomadini	Nomada		baccata	Smith, 1844		England
Acu	1309	invalid	species	alboguttata misident.	APOIDEA	Apidae	NOMADINAE	Nomadini	Nomada		alboguttata	misident.
Acu	1310	valid	species	conjungens Herrich-Schäffer, 1839	APOIDEA	Apidae	NOMADINAE	Nomadini	Nomada		conjungens	Herrich-Schäffer, 1839		England
Acu	1311	valid	species	errans Lepeletier, 1841	APOIDEA	Apidae	NOMADINAE	Nomadini	Nomada		errans	Lepeletier, 1841		England
Acu	1312	valid	species	fabriciana (Linnaeus, 1767, Apis)	APOIDEA	Apidae	NOMADINAE	Nomadini	Nomada		fabriciana	(Linnaeus, 1767)		England, Scotland, Wales, Ireland, Isle of Man	Apis
Acu	1313	invalid	species	fabriciella (Kirby, 1802, Apis)	APOIDEA	Apidae	NOMADINAE	Nomadini	Nomada		fabriciella	(Kirby, 1802, Apis)
Acu	1314	invalid	species	quadrinotata (Kirby, 1802, Apis)	APOIDEA	Apidae	NOMADINAE	Nomadini	Nomada		quadrinotata	(Kirby, 1802, Apis)
Acu	1315	valid	species	ferruginata (Linnaeus, 1767, Apis)	APOIDEA	Apidae	NOMADINAE	Nomadini	Nomada		ferruginata	(Linnaeus, 1767)		England, Scotland, Wales	Apis
Acu	1316	invalid	species	lateralis misident.	APOIDEA	Apidae	NOMADINAE	Nomadini	Nomada		lateralis	misident.
Acu	1317	invalid	species	xanthosticta (Kirby, 1802, Apis)	APOIDEA	Apidae	NOMADINAE	Nomadini	Nomada		xanthosticta	(Kirby, 1802, Apis)
Acu	1318	invalid	species	bridgmaniana Smith, 1876	APOIDEA	Apidae	NOMADINAE	Nomadini	Nomada		bridgmaniana	Smith, 1876
Acu	1319	valid	species	flava Panzer, 1798	APOIDEA	Apidae	NOMADINAE	Nomadini	Nomada		flava	Panzer, 1798		England, Wales, Ireland
Acu	1320	valid	species	flavoguttata (Kirby, 1802, Apis)	APOIDEA	Apidae	NOMADINAE	Nomadini	Nomada		flavoguttata	(Kirby, 1802)		England, Scotland, Wales, Ireland, Isle of Man	Apis
Acu	1321	invalid	species	rufocincta (Kirby, 1802, Apis)	APOIDEA	Apidae	NOMADINAE	Nomadini	Nomada		rufocincta	(Kirby, 1802, Apis)
Acu	1322	valid	species	flavopicta (Kirby, 1802, Apis)	APOIDEA	Apidae	NOMADINAE	Nomadini	Nomada		flavopicta	(Kirby, 1802)		England, Wales	Apis
Acu	1323	invalid	species	jacobaeae misident. [?]	APOIDEA	Apidae	NOMADINAE	Nomadini	Nomada		jacobaeae	misident. [?]
Acu	1324	valid	species	fucata Panzer, 1798	APOIDEA	Apidae	NOMADINAE	Nomadini	Nomada		fucata	Panzer, 1798		England, Wales
Acu	1325	valid	species	fulvicornis Fabricius, 1793	APOIDEA	Apidae	NOMADINAE	Nomadini	Nomada		fulvicornis	Fabricius, 1793		England, Wales
Acu	1326	invalid	species	lineola Panzer, 1798	APOIDEA	Apidae	NOMADINAE	Nomadini	Nomada		lineola	Panzer, 1798
Acu	1327	invalid	species	sexcincta (Kirby, 1802, Apis)	APOIDEA	Apidae	NOMADINAE	Nomadini	Nomada		sexcincta	(Kirby, 1802, Apis)
Acu	1328	invalid	species	caprea (Kirby, 1802, Apis)	APOIDEA	Apidae	NOMADINAE	Nomadini	Nomada		caprea	(Kirby, 1802, Apis)
Acu	1329	invalid	species	cornigera (Kirby, 1802, Apis)	APOIDEA	Apidae	NOMADINAE	Nomadini	Nomada		cornigera	(Kirby, 1802, Apis)
Acu	1330	invalid	species	subcornuta (Kirby, 1802, Apis)	APOIDEA	Apidae	NOMADINAE	Nomadini	Nomada		subcornuta	(Kirby, 1802, Apis)
Acu	1331	valid	species	goodeniana (Kirby, 1802, Apis)	APOIDEA	Apidae	NOMADINAE	Nomadini	Nomada		goodeniana	(Kirby, 1802)		England, Scotland, Wales, Ireland, Isle of Man	Apis
Acu	1332	invalid	species	succincta misident.	APOIDEA	Apidae	NOMADINAE	Nomadini	Nomada		succincta	misident.
Acu	1333	invalid	species	alternata (Kirby, 1802, Apis)	APOIDEA	Apidae	NOMADINAE	Nomadini	Nomada		alternata	(Kirby, 1802, Apis)
Acu	1334	valid	species	guttulata Schenck, 1861	APOIDEA	Apidae	NOMADINAE	Nomadini	Nomada		guttulata	Schenck, 1861		England
Acu	1335	valid	species	hirtipes Pérez, 1884	APOIDEA	Apidae	NOMADINAE	Nomadini	Nomada		hirtipes	Pérez, 1884		England, Wales
Acu	1336	invalid	species	bucephalae Perkins, 1917	APOIDEA	Apidae	NOMADINAE	Nomadini	Nomada		bucephalae	Perkins, 1917
Acu	1337	valid	species	integra Brullé, 1832	APOIDEA	Apidae	NOMADINAE	Nomadini	Nomada		integra	Brullé, 1832		England, Wales
Acu	1338	invalid	species	ferruginata misident.	APOIDEA	Apidae	NOMADINAE	Nomadini	Nomada		ferruginata	misident.
Acu	1339	invalid	species	germanica misident.	APOIDEA	Apidae	NOMADINAE	Nomadini	Nomada		germanica	misident.
Acu	1340	invalid	species	pleurosticta misident.	APOIDEA	Apidae	NOMADINAE	Nomadini	Nomada		pleurosticta	misident.
Acu	1341	invalid	species	stigma misident.	APOIDEA	Apidae	NOMADINAE	Nomadini	Nomada		stigma	misident.
Acu	1342	invalid	species	cinctiventris Friese, 1921	APOIDEA	Apidae	NOMADINAE	Nomadini	Nomada		cinctiventris	Friese, 1921
Acu	1343	valid	species	lathburiana (Kirby, 1802, Apis)	APOIDEA	Apidae	NOMADINAE	Nomadini	Nomada		lathburiana	(Kirby, 1802)		England, Wales	Apis
Acu	1344	invalid	species	rufiventris (Kirby, 1802, Apis)	APOIDEA	Apidae	NOMADINAE	Nomadini	Nomada		rufiventris	(Kirby, 1802, Apis)
Acu	1345	valid	species	leucophthalma (Kirby, 1802, Apis)	APOIDEA	Apidae	NOMADINAE	Nomadini	Nomada		leucophthalma	(Kirby, 1802)		England, Scotland, Wales, Ireland, Isle of Man	Apis
Acu	1346	invalid	species	borealis Zetterstedt, 1838	APOIDEA	Apidae	NOMADINAE	Nomadini	Nomada		borealis	Zetterstedt, 1838
Acu	1347	invalid	species	inquilina Smith, 1844	APOIDEA	Apidae	NOMADINAE	Nomadini	Nomada		inquilina	Smith, 1844
Acu	1348	valid	species	marshamella (Kirby, 1802, Apis)	APOIDEA	Apidae	NOMADINAE	Nomadini	Nomada		marshamella	(Kirby, 1802)		England, Scotland, Wales, Ireland, Isle of Man	Apis
Acu	1349	invalid	species	alternata misident.	APOIDEA	Apidae	NOMADINAE	Nomadini	Nomada		alternata	misident.
Acu	1350	valid	species	obtusifrons Nylander, 1848	APOIDEA	Apidae	NOMADINAE	Nomadini	Nomada		obtusifrons	Nylander, 1848		England, Scotland, Wales, Ireland, Isle of Man
Acu	1351	invalid	species	mistura Smith, 1851	APOIDEA	Apidae	NOMADINAE	Nomadini	Nomada		mistura	Smith, 1851
Acu	1352	valid	species	panzeri Lepeletier, 1841	APOIDEA	Apidae	NOMADINAE	Nomadini	Nomada		panzeri	Lepeletier, 1841		England, Scotland, Wales, Ireland
Acu	1353	invalid	species	ruficornis misident.	APOIDEA	Apidae	NOMADINAE	Nomadini	Nomada		ruficornis	misident.
Acu	1354	valid	species	roberjeotiana Panzer, 1799	APOIDEA	Apidae	NOMADINAE	Nomadini	Nomada		roberjeotiana	Panzer, 1799		England, Scotland, Wales, Isle of Man
Acu	1355	invalid	species	tormentillae Alfken, 1901	APOIDEA	Apidae	NOMADINAE	Nomadini	Nomada		tormentillae	Alfken, 1901
Acu	1356	valid	species	ruficornis (Linnaeus, 1758, Apis)	APOIDEA	Apidae	NOMADINAE	Nomadini	Nomada		ruficornis	(Linnaeus, 1758)		England, Scotland, Wales, Ireland, Isle of Man	Apis
Acu	1357	invalid	species	bifida Thomson, 1872	APOIDEA	Apidae	NOMADINAE	Nomadini	Nomada		bifida	Thomson, 1872
Acu	1358	valid	species	rufipes Fabricius, 1793	APOIDEA	Apidae	NOMADINAE	Nomadini	Nomada		rufipes	Fabricius, 1793		England, Scotland, Wales, Ireland, Isle of Man
Acu	1359	invalid	species	solidaginis misident.	APOIDEA	Apidae	NOMADINAE	Nomadini	Nomada		solidaginis	misident.
Acu	1360	invalid	species	picta (Kirby, 1802, Apis)	APOIDEA	Apidae	NOMADINAE	Nomadini	Nomada		picta	(Kirby, 1802, Apis)
Acu	1361	invalid	species	rufopicta (Kirby, 1802, Apis)	APOIDEA	Apidae	NOMADINAE	Nomadini	Nomada		rufopicta	(Kirby, 1802, Apis)
Acu	1362	valid	species	sexfasciata Panzer, 1799	APOIDEA	Apidae	NOMADINAE	Nomadini	Nomada		sexfasciata	Panzer, 1799		England
Acu	1363	invalid	species	connexa (Kirby, 1802, Apis)	APOIDEA	Apidae	NOMADINAE	Nomadini	Nomada		connexa	(Kirby, 1802, Apis)
Acu	1364	invalid	species	schaefferella (Kirby, 1802, Apis)	APOIDEA	Apidae	NOMADINAE	Nomadini	Nomada		schaefferella	(Kirby, 1802, Apis)
Acu	1365	valid	species	sheppardana (Kirby, 1802, Apis)	APOIDEA	Apidae	NOMADINAE	Nomadini	Nomada		sheppardana	(Kirby, 1802)		England, Wales	Apis
Acu	1366	invalid	species	furva misident.	APOIDEA	Apidae	NOMADINAE	Nomadini	Nomada		furva	misident.
Acu	1367	invalid	species	dalii Curtis, 1832	APOIDEA	Apidae	NOMADINAE	Nomadini	Nomada		dalii	Curtis, 1832
Acu	1368	valid	species	signata Jurine, 1807	APOIDEA	Apidae	NOMADINAE	Nomadini	Nomada		signata	Jurine, 1807		England, Wales
Acu	1369	valid	species	striata Fabricius, 1793	APOIDEA	Apidae	NOMADINAE	Nomadini	Nomada		striata	Fabricius, 1793		England, Scotland, Wales, Ireland
Acu	1370	invalid	species	hillana (Kirby, 1802, Apis)	APOIDEA	Apidae	NOMADINAE	Nomadini	Nomada		hillana	(Kirby, 1802, Apis)
Acu	1371	invalid	species	ochrostoma (Kirby, 1802, Apis)	APOIDEA	Apidae	NOMADINAE	Nomadini	Nomada		ochrostoma	(Kirby, 1802, Apis)
Acu	1372	invalid	species	vidua Smith, 1844	APOIDEA	Apidae	NOMADINAE	Nomadini	Nomada		vidua	Smith, 1844
Acu	1374	valid	Subfamily	XYLOCOPINAE Latreille, 1802	APOIDEA	Apidae	Xylocopinae					Latreille, 1802
Acu	1376	valid	tribe	Ceratinini Latreille, 1802	APOIDEA	Apidae	XYLOCOPINAE	Ceratinini				Latreille, 1802
Acu	1378	valid	genus	CERATINA Latreille, 1802	APOIDEA	Apidae	XYLOCOPINAE	Ceratinini	Ceratina			Latreille, 1802
Acu	1379	valid	subgenus	EUCERATINA Hirashima, Moure & Daly, 1971	APOIDEA	Apidae	XYLOCOPINAE	Ceratinini	Ceratina	Euceratina		Hirashima, Moure & Daly, 1971
Acu	1380	valid	species	cyanea (Kirby, 1802, Apis)	APOIDEA	Apidae	XYLOCOPINAE	Ceratinini	Ceratina	Euceratina	cyanea	(Kirby, 1802)		England	Apis
Acu	1382	valid	tribe	XYLOCOPINI Latreille, 1802	APOIDEA	Apidae	XYLOCOPINAE	Xylocopini				Latreille, 1802
Acu	1384	valid	genus	XYLOCOPA Latreille, 1809	APOIDEA	Apidae	XYLOCOPINAE	Xylocopini	Xylocopa			Latreille, 1809
Acu	1385	valid	subgenus	XYLOCOPA Latreille, 1809	APOIDEA	Apidae	XYLOCOPINAE	Xylocopini	Xylocopa	Xylocopa		Latreille, 1809
Acu	1386	valid	species	violacea (Linnaeus, 1758, Apis)	APOIDEA	Apidae	XYLOCOPINAE	Xylocopini	Xylocopa	Xylocopa	violacea	(Linnaeus, 1758)		England	Apis
Acu	1388	valid	Family	Colletidae Lepeletier, 1841	APOIDEA	Colletidae						Lepeletier, 1841
Acu	1390	valid	Subfamily	Colletinae Lepeletier, 1841	APOIDEA	Colletidae	Colletinae					Lepeletier, 1841
Acu	1392	valid	genus	COLLETES Latreille, 1802	APOIDEA	Colletidae	Colletinae		Colletes			Latreille, 1802
Acu	1393	valid	subgenus	COLLETES Latreille, 1802	APOIDEA	Colletidae	Colletinae		Colletes	Colletes		Latreille, 1802
Acu	1406	valid	species	cunicularius (Linnaeus, 1761, Apis)	APOIDEA	Colletidae	Colletinae		Colletes	Pachycolletes	cunicularius	(Linnaeus, 1761)	#N/A	England, Wales	Apis
Acu	1394	valid	species	daviesanus Smith, 1846	APOIDEA	Colletidae	Colletinae		Colletes	Colletes	daviesanus	Smith, 1846		England, Scotland, Wales, Ireland
Acu	1395	valid	species	floralis Eversmann, 1852	APOIDEA	Colletidae	Colletinae		Colletes	Colletes	floralis	Eversmann, 1852		England, Scotland, Ireland
Acu	1396	invalid	species	montanus Morawitz, 1876	APOIDEA	Colletidae	Colletinae		Colletes	Colletes	montanus	Morawitz, 1876
Acu	1397	valid	species	fodiens (Geoffroy, 1785, Apis)	APOIDEA	Colletidae	Colletinae		Colletes	Colletes	fodiens	(Geoffroy, 1785)		England, Scotland, Wales	Apis
Acu	1398	valid	species	halophilus Verhoeff, 1944	APOIDEA	Colletidae	Colletinae		Colletes	Colletes	halophilus	Verhoeff, 1944		England
Acu	1399	valid	species	hederae Schmidt & Westrich, 1993	APOIDEA	Colletidae	Colletinae		Colletes	Colletes	hederae	Schmidt & Westrich, 1993	added by Cross (2002)	England
Acu	1400	valid	species	marginatus Smith, 1846	APOIDEA	Colletidae	Colletinae		Colletes	Colletes	marginatus	Smith, 1846		England, Wales
Acu	1401	valid	species	similis Schenck, 1853	APOIDEA	Colletidae	Colletinae		Colletes	Colletes	similis	Schenck, 1853		England, Wales, Ireland, Isle of Man
Acu	1402	invalid	species	picistigma Thomson, 1872	APOIDEA	Colletidae	Colletinae		Colletes	Colletes	picistigma	Thomson, 1872
Acu	1403	valid	species	succinctus (Linnaeus, 1758, Apis)	APOIDEA	Colletidae	Colletinae		Colletes	Colletes	succinctus	(Linnaeus, 1758)		England, Scotland, Wales, Ireland, Isle of Man	Apis
Acu	1408	valid	Subfamily	HYLAEINAE Viereck, 1916	APOIDEA	Colletidae	Hylaeinae					Viereck, 1916
Acu	1410	valid	genus	HYLAEUS Fabricius, 1793	APOIDEA	Colletidae	HYLAEINAE		Hylaeus			Fabricius, 1793
Acu	1411	valid	subgenus	ABRUPTA Popov, 1939	APOIDEA	Colletidae	HYLAEINAE		Hylaeus	Abrupta		Popov, 1939
Acu	1412	valid	species	cornutus Curtis, 1831	APOIDEA	Colletidae	HYLAEINAE		Hylaeus	Abrupta	cornutus	Curtis, 1831		England
Acu	1413	invalid	species	plantarius Smith, 1842	APOIDEA	Colletidae	HYLAEINAE		Hylaeus	Abrupta	plantarius	Smith, 1842
Acu	1415	valid	subgenus	HYLAEUS Fabricius, 1793	APOIDEA	Colletidae	HYLAEINAE		Hylaeus	Hylaeus		Fabricius, 1793
Acu	1416	valid	species	communis Nylander, 1852	APOIDEA	Colletidae	HYLAEINAE		Hylaeus	Hylaeus	communis	Nylander, 1852		England, Scotland, Wales, Ireland
Acu	1417	invalid	species	rupestris (Smith, 1872, Prosopis)	APOIDEA	Colletidae	HYLAEINAE		Hylaeus	Hylaeus	rupestris	(Smith, 1872, Prosopis)
Acu	1419	valid	subgenus	KOPTOGASTER Alfken, 1912	APOIDEA	Colletidae	HYLAEINAE		Hylaeus	Koptogaster		Alfken, 1912
Acu	1420	valid	species	punctulatissimus Smith, 1842 E	APOIDEA	Colletidae	HYLAEINAE		Hylaeus	Koptogaster	punctulatissimus	Smith, 1842	Probably extinct in Britain	England
Acu	1422	valid	subgenus	LAMDOPSIS Popov, 1939	APOIDEA	Colletidae	HYLAEINAE		Hylaeus	Lamdopsis		Popov, 1939
Acu	1423	valid	species	annularis (Kirby, 1802, Mellita)	APOIDEA	Colletidae	HYLAEINAE		Hylaeus	Lamdopsis	annularis	(Kirby, 1802)	Notton & Dathe (2008) designated as lectotype a female specimen that corresponds to the species here called annularis, with the species generally called annularis taking the name dilatatus.	England	Mellita
Acu	1424	invalid	species	euryscapus misident.	APOIDEA	Colletidae	HYLAEINAE		Hylaeus	Lamdopsis	euryscapus	misident.
Acu	1425	invalid	species	spilotus Forster, 1871	APOIDEA	Colletidae	HYLAEINAE		Hylaeus	Lamdopsis	spilotus	Forster, 1871
Acu	1426	invalid	species	masoni (Saunders, 1894, Prosopis)	APOIDEA	Colletidae	HYLAEINAE		Hylaeus	Lamdopsis	masoni	(Saunders, 1894, Prosopis)
Acu	1427	valid	species	dilatatus (Kirby, 1802, Mellita)	APOIDEA	Colletidae	HYLAEINAE		Hylaeus	Lamdopsis	dilatatus	(Kirby, 1802)		England, Wales	Mellita
Acu	1428	invalid	species	annularis misident.	APOIDEA	Colletidae	HYLAEINAE		Hylaeus	Lamdopsis	annularis	misident.
Acu	1430	valid	subgenus	PARAPROSOPIS Popov, 1939	APOIDEA	Colletidae	HYLAEINAE		Hylaeus	Paraprosopis		Popov, 1939
Acu	1431	valid	species	pictipes Nylander, 1852	APOIDEA	Colletidae	HYLAEINAE		Hylaeus	Paraprosopis	pictipes	Nylander, 1852		England
Acu	1432	invalid	species	varipes (Smith, 1853, Prosopis)	APOIDEA	Colletidae	HYLAEINAE		Hylaeus	Paraprosopis	varipes	(Smith, 1853, Prosopis)
Acu	1434	valid	subgenus	PROSOPIS Fabricius, 1804	APOIDEA	Colletidae	HYLAEINAE		Hylaeus	Prosopis		Fabricius, 1804
Acu	1435	invalid	species	NESOPROSOPIS Perkins, R.C.L., 1899	APOIDEA	Colletidae	HYLAEINAE		Hylaeus	Prosopis	NESOPROSOPIS	Perkins, R.C.L., 1899
Acu	1436	valid	species	brevicornis Nylander, 1852	APOIDEA	Colletidae	HYLAEINAE		Hylaeus	Prosopis	brevicornis	Nylander, 1852		England, Scotland, Wales, Ireland, Isle of Man
Acu	1437	invalid	species	rubicola (Smith, 1869, Prosopis) preocc.	APOIDEA	Colletidae	HYLAEINAE		Hylaeus	Prosopis	rubicola	(Smith, 1869, Prosopis) preocc.
Acu	1438	valid	species	confusus Nylander, 1852	APOIDEA	Colletidae	HYLAEINAE		Hylaeus	Prosopis	confusus	Nylander, 1852		England, Scotland, Wales, Ireland
Acu	1439	valid	species	incongruus Förster, 1871	APOIDEA	Colletidae	HYLAEINAE		Hylaeus	Prosopis	incongruus	Förster, 1871		England, Wales
Acu	1440	invalid	species	gibbus misident.	APOIDEA	Colletidae	HYLAEINAE		Hylaeus	Prosopis	gibbus	misident.
Acu	1441	invalid	species	genalis Thomson, 1872	APOIDEA	Colletidae	HYLAEINAE		Hylaeus	Prosopis	genalis	Thomson, 1872
Acu	1442	valid	species	pectoralis Förster, 1871	APOIDEA	Colletidae	HYLAEINAE		Hylaeus	Prosopis	pectoralis	Förster, 1871		England
Acu	1443	invalid	species	kriechbaumeri Förster, 1871	APOIDEA	Colletidae	HYLAEINAE		Hylaeus	Prosopis	kriechbaumeri	Förster, 1871
Acu	1444	invalid	species	palustris (Perkins, 1900, Prosopis)	APOIDEA	Colletidae	HYLAEINAE		Hylaeus	Prosopis	palustris	(Perkins, 1900, Prosopis)
Acu	1445	valid	species	signatus (Panzer, 1798, Sphex)	APOIDEA	Colletidae	HYLAEINAE		Hylaeus	Prosopis	signatus	(Panzer, 1798)		England, Wales	Sphex
Acu	1447	valid	subgenus	SPATULARIELLA Popov, 1939	APOIDEA	Colletidae	HYLAEINAE		Hylaeus	Spatulariella		Popov, 1939
Acu	1448	valid	species	hyalinatus Smith, 1842	APOIDEA	Colletidae	HYLAEINAE		Hylaeus	Spatulariella	hyalinatus	Smith, 1842		England, Scotland, Wales, Ireland, Isle of Man
Acu	1450	valid	Family	Halictidae Thomson, 1869	APOIDEA	Halictidae						Thomson, 1869
Acu	1452	valid	Subfamily	Halictinae Thomson, 1869	APOIDEA	Halictidae	Halictinae					Thomson, 1869
Acu	1454	valid	genus	HALICTUS Latreille, 1804	APOIDEA	Halictidae	Halictinae		Halictus			Latreille, 1804
Acu	1455	valid	subgenus	HALICTUS Latreille, 1804	APOIDEA	Halictidae	Halictinae		Halictus	Halictus		Latreille, 1804
Acu	1456	valid	species	eurygnathus Blüthgen, 1931	APOIDEA	Halictidae	Halictinae		Halictus	Halictus	eurygnathus	Blüthgen, 1931		England
Acu	1457	invalid	species	quadricinctus misident.	APOIDEA	Halictidae	Halictinae		Halictus	Halictus	quadricinctus	misident.
Acu	1458	invalid	species	tetrazonius misident.	APOIDEA	Halictidae	Halictinae		Halictus	Halictus	tetrazonius	misident.
Acu	1459	valid	species	maculatus Smith, 1848 E	APOIDEA	Halictidae	Halictinae		Halictus	Halictus	maculatus	Smith, 1848	Probably extinct in Britain.	England
Acu	1460	valid	species	rubicundus (Christ, 1791, Apis)	APOIDEA	Halictidae	Halictinae		Halictus	Halictus	rubicundus	(Christ, 1791)		England, Scotland, Wales, Ireland, Isle of Man	Apis
Acu	1461	invalid	species	quadrifasciatus Smith, 1870	APOIDEA	Halictidae	Halictinae		Halictus	Halictus	quadrifasciatus	Smith, 1870
Acu	1462	invalid	species	nesiotis Perkins, 1922	APOIDEA	Halictidae	Halictinae		Halictus	Halictus	nesiotis	Perkins, 1922
Acu	1464	valid	subgenus	SELADONIA Robertson, 1918	APOIDEA	Halictidae	Halictinae		Halictus	Seladonia		Robertson, 1918
Acu	1465	valid	species	confusus Smith, 1853	APOIDEA	Halictidae	Halictinae		Halictus	Seladonia	confusus	Smith, 1853		England
Acu	1466	invalid	species	alpinus Alfken, 1907	APOIDEA	Halictidae	Halictinae		Halictus	Seladonia	alpinus	Alfken, 1907
Acu	1467	invalid	species	confusus perkinsi Blüthgen, 1926	APOIDEA	Halictidae	Halictinae		Halictus	Seladonia	confusus perkinsi	Blüthgen, 1926
Acu	1468	invalid	species	flavipes misident.	APOIDEA	Halictidae	Halictinae		Halictus	Seladonia	flavipes	misident.
Acu	1469	valid	species	subauratus (Rossi, 1792, Apis)	APOIDEA	Halictidae	Halictinae		Halictus	Seladonia	subauratus	(Rossi, 1792)	Probably extinct in Britain.		Apis
Acu	1470	invalid	species	gramineus Smith, 1849	APOIDEA	Halictidae	Halictinae		Halictus	Seladonia	gramineus	Smith, 1849
Acu	1471	valid	species	tumulorum (Linnaeus, 1758, Apis)	APOIDEA	Halictidae	Halictinae		Halictus	Seladonia	tumulorum	(Linnaeus, 1758)		England, Scotland, Wales, Ireland	Apis
Acu	1473	valid	genus	LASIOGLOSSUM Curtis, 1833	APOIDEA	Halictidae	Halictinae		Lasioglossum			Curtis, 1833	Nomenclature updated from Pesenko (2007) but, as Pesenko’s study was limited to the Palaearctic region, we do not follow his elevation of Evylaeus to a valid genus, nor have we adopted his numerous subgenera.
Acu	1474	valid	subgenus	DIALICTUS Robertson, 1902	APOIDEA	Halictidae	Halictinae		Lasioglossum	Dialictus		Robertson, 1902
Acu	1475	invalid	species	CHLORALICTUS Robertson, 1902	APOIDEA	Halictidae	Halictinae		Lasioglossum	Dialictus	CHLORALICTUS	Robertson, 1902
Acu	1476	valid	species	cupromicans (Pérez, 1903, Halictus)	APOIDEA	Halictidae	Halictinae		Lasioglossum	Dialictus	cupromicans	(Pérez, 1903)	The Irish population has been described as the subspecies hibernicum Ebmer, 1970, with other populations referred to the subspecies scoticum Ebmer, 1970.	England, Scotland, Wales, Ireland, Isle of Man	Halictus
Acu	1477	valid	species	leucopus (Kirby, 1802, Melitta)	APOIDEA	Halictidae	Halictinae		Lasioglossum	Dialictus	leucopus	(Kirby, 1802)		England, Scotland, Wales, Ireland, Isle of Man	Melitta
Acu	1478	invalid	species	aeratum (Kirby, 1802, Melitta)	APOIDEA	Halictidae	Halictinae		Lasioglossum	Dialictus	aeratum	(Kirby, 1802, Melitta)
Acu	1479	invalid	species	semiaeneum (Brullé, 1832, Halictus)	APOIDEA	Halictidae	Halictinae		Lasioglossum	Dialictus	semiaeneum	(Brullé, 1832, Halictus)
Acu	1480	invalid	species	viridaeneum (Blüthgen, 1918, Halictus)	APOIDEA	Halictidae	Halictinae		Lasioglossum	Dialictus	viridaeneum	(Blüthgen, 1918, Halictus)
Acu	1481	valid	species	morio (Fabricius, 1793, Hylaeus)	APOIDEA	Halictidae	Halictinae		Lasioglossum	Dialictus	morio	(Fabricius, 1793)		England, Scotland, Wales, Isle of Man	Hylaeus
Acu	1482	valid	species	smeathmanellum (Kirby, 1802, Melitta)	APOIDEA	Halictidae	Halictinae		Lasioglossum	Dialictus	smeathmanellum	(Kirby, 1802)		England, Scotland, Wales, Isle of Man	Melitta
		valid	species	smeathmanellum (Kirby, 1802, Melitta)	APOIDEA	Halictidae	Halictinae		Lasioglossum	Hemihalictus		Cockerell, 1897
Acu	1486	valid	species	angusticeps (Perkins, 1895, Halictus)	APOIDEA	Halictidae	Halictinae		Lasioglossum	Hemihalictus	angusticeps	(Perkins, 1895)		England	Halictus
Acu	1487	valid	species	brevicorne (Schenck, 1869, Halictus)	APOIDEA	Halictidae	Halictinae		Lasioglossum	Hemihalictus	brevicorne	(Schenck, 1869)		England	Halictus
Acu	1503	valid	species	minutissimum (Kirby, 1802, Melitta)	APOIDEA	Halictidae	Halictinae		Lasioglossum	Hemihalictus	minutissimum	(Kirby, 1802)		England, Wales, Ireland	Melitta
Acu	1504	invalid	species	arnoldi (Saunders, 1910, Halictus)	APOIDEA	Halictidae	Halictinae		Lasioglossum	Hemihalictus	arnoldi	(Saunders, 1910, Halictus)
Acu	1505	valid	species	nitidiusculum (Kirby, 1802, Melitta)	APOIDEA	Halictidae	Halictinae		Lasioglossum	Hemihalictus	nitidiusculum	(Kirby, 1802)		England, Scotland, Wales, Ireland, Isle of Man	Melitta
Acu	1506	valid	species	parvulum (Schenck, 1853, Hylaeus)	APOIDEA	Halictidae	Halictinae		Lasioglossum	Hemihalictus	parvulum	(Schenck, 1853)		England, Wales	Hylaeus
Acu	1507	invalid	species	minutum misident.	APOIDEA	Halictidae	Halictinae		Lasioglossum	Hemihalictus	minutum	misident.
Acu	1508	valid	species	pauperatum (Brullé, 1832, Halictus)	APOIDEA	Halictidae	Halictinae		Lasioglossum	Hemihalictus	pauperatum	(Brullé, 1832)		England	Halictus
Acu	1509	invalid	species	breviceps (Saunders, 1879, Halictus)	APOIDEA	Halictidae	Halictinae		Lasioglossum	Hemihalictus	breviceps	(Saunders, 1879, Halictus)
Acu	1512	valid	species	punctatissimum (Schenck, 1853, Hylaeus)	APOIDEA	Halictidae	Halictinae		Lasioglossum	Hemihalictus	punctatissimum	(Schenck, 1853)		England, Scotland, Wales, Ireland, Isle of Man	Hylaeus
Acu	1513	invalid	species	longiceps (Saunders, 1879, Halictus)	APOIDEA	Halictidae	Halictinae		Lasioglossum	Hemihalictus	longiceps	(Saunders, 1879, Halictus)
Acu	1514	valid	species	puncticolle (Morawitz, 1872, Halictus)	APOIDEA	Halictidae	Halictinae		Lasioglossum	Hemihalictus	puncticolle	(Morawitz, 1872)		England	Halictus
Acu	1515	valid	species	rufitarse (Zetterstedt, 1838, Halictus)	APOIDEA	Halictidae	Halictinae		Lasioglossum	Hemihalictus	rufitarse	(Zetterstedt, 1838)		England, Scotland, Wales, Ireland	Halictus
Acu	1516	invalid	species	atricorne (Smith, 1870, Halictus)	APOIDEA	Halictidae	Halictinae		Lasioglossum	Hemihalictus	atricorne	(Smith, 1870, Halictus)
Acu	1517	valid	species	semilucens (Alfken, 1914, Halictus)	APOIDEA	Halictidae	Halictinae		Lasioglossum	Hemihalictus	semilucens	(Alfken, 1914)		England	Halictus
Acu	1518	valid	species	sexstrigatum (Schenck, 1870, Halictus)	APOIDEA	Halictidae	Halictinae		Lasioglossum	Hemihalictus	sexstrigatum	(Schenck, 1870)	added by Hawkins (2011)	England	Halictus
Acu	1519	invalid	species	sabulosum (Warncke, 1986, Halictus)	APOIDEA	Halictidae	Halictinae		Lasioglossum	Hemihalictus	sabulosum	(Warncke, 1986, Halictus)
Acu	1520	valid	species	villosulum (Kirby, 1802, Melitta)	APOIDEA	Halictidae	Halictinae		Lasioglossum	Hemihalictus	villosulum	(Kirby, 1802)		England, Scotland, Wales, Ireland, Isle of Man	Melitta
Acu	1521	invalid	species	punctulatum (Kirby, 1802, Melitta)	APOIDEA	Halictidae	Halictinae		Lasioglossum	Hemihalictus	punctulatum	(Kirby, 1802, Melitta)
		invalid	species	punctulatum (Kirby, 1802, Melitta)	APOIDEA	Halictidae	Halictinae		Lasioglossum	Lasioglossum		Curtis, 1833
Acu	1524	valid	species	laevigatum (Kirby, 1802, Melitta)	APOIDEA	Halictidae	Halictinae		Lasioglossum	Lasioglossum	laevigatum	(Kirby, 1802)		England, Wales	Melitta
Acu	1525	invalid	species	lugubris (Kirby, 1802, Melitta)	APOIDEA	Halictidae	Halictinae		Lasioglossum	Lasioglossum	lugubris	(Kirby, 1802, Melitta)
Acu	1526	valid	species	lativentre (Schenck, 1853, Hylaeus)	APOIDEA	Halictidae	Halictinae		Lasioglossum	Lasioglossum	lativentre	(Schenck, 1853)		England, Wales	Hylaeus
Acu	1527	invalid	species	decipiens (Perkins, 1913, Halictus)	APOIDEA	Halictidae	Halictinae		Lasioglossum	Lasioglossum	decipiens	(Perkins, 1913, Halictus)
Acu	1530	valid	species	prasinum (Smith, 1848, Halictus)	APOIDEA	Halictidae	Halictinae		Lasioglossum	Lasioglossum	prasinum	(Smith, 1848)		England, Wales	Halictus
Acu	1531	valid	species	quadrinotatum (Kirby, 1802, Melitta)	APOIDEA	Halictidae	Halictinae		Lasioglossum	Lasioglossum	quadrinotatum	(Kirby, 1802)		England	Melitta
Acu	1532	valid	species	sexnotatum (Kirby, 1802, Melitta)	APOIDEA	Halictidae	Halictinae		Lasioglossum	Lasioglossum	sexnotatum	(Kirby, 1802)		England	Melitta
Acu	1533	invalid	species	nitidum misident.	APOIDEA	Halictidae	Halictinae		Lasioglossum	Lasioglossum	nitidum	misident.
Acu	1534	valid	species	xanthopus (Kirby, 1802, Melitta)	APOIDEA	Halictidae	Halictinae		Lasioglossum	Lasioglossum	xanthopus	(Kirby, 1802)		England, Wales	Melitta
Acu	1535	invalid	species	tricingulum Curtis, 1833	APOIDEA	Halictidae	Halictinae		Lasioglossum	Lasioglossum	tricingulum	Curtis, 1833
										Leuchalictus		Warncke, 1975
Acu	1528	valid	species	leucozonium (Schrank, 1781, Apis)	APOIDEA	Halictidae	Halictinae		Lasioglossum	Lasioglossum	leucozonium	(Schrank, 1781)		England, Scotland, Wales, Ireland	Apis
Acu	1529	invalid	species	similis (Smith, 1853, Halictus)	APOIDEA	Halictidae	Halictinae		Lasioglossum	Lasioglossum	similis	(Smith, 1853, Halictus)
Acu	1536	valid	species	zonulum (Smith, 1848, Halictus)	APOIDEA	Halictidae	Halictinae		Lasioglossum	Lasioglossum	zonulum	(Smith, 1848)		England, Wales	Halictus
Acu	1484	valid	subgenus	EVYLAEUS Robertson, 1902	APOIDEA	Halictidae	Halictinae		Lasioglossum	Sphecodogastra		Ashmead, 1899
Acu	1485	valid	species	albipes (Fabricius, 1781, Apis)	APOIDEA	Halictidae	Halictinae		Lasioglossum	Sphecodogastra	albipes	(Fabricius, 1781)		England, Scotland, Wales, Ireland, Isle of Man	Apis
Acu	1488	valid	species	calceatum (Scopoli, 1763, Apis)	APOIDEA	Halictidae	Halictinae		Lasioglossum	Sphecodogastra	calceatum	(Scopoli, 1763)		England, Scotland, Wales, Ireland, Isle of Man	Apis
Acu	1489	invalid	species	cylindricum (Fabricius, 1793, Hylaeus)	APOIDEA	Halictidae	Halictinae		Lasioglossum	Sphecodogastra	cylindricum	(Fabricius, 1793, Hylaeus)
Acu	1490	invalid	species	fulvocinctum (Kirby, 1802, Melitta)	APOIDEA	Halictidae	Halictinae		Lasioglossum	Sphecodogastra	fulvocinctum	(Kirby, 1802, Melitta)
Acu	1491	invalid	species	obovatum (Kirby, 1802, Melitta)	APOIDEA	Halictidae	Halictinae		Lasioglossum	Sphecodogastra	obovatum	(Kirby, 1802, Melitta)
Acu	1492	valid	species	fratellum (Pérez, 1903, Halictus)	APOIDEA	Halictidae	Halictinae		Lasioglossum	Sphecodogastra	fratellum	(Pérez, 1903)		England, Scotland, Wales, Ireland	Halictus
Acu	1493	invalid	species	nigrum misident.	APOIDEA	Halictidae	Halictinae		Lasioglossum	Sphecodogastra	nigrum	misident.
Acu	1494	invalid	species	subfasciatum (Nylander, 1848, Halictus)	APOIDEA	Halictidae	Halictinae		Lasioglossum	Sphecodogastra	subfasciatum	(Nylander, 1848, Halictus)
Acu	1495	invalid	species	freygessneri (Alfken, 1905, Halictus)	APOIDEA	Halictidae	Halictinae		Lasioglossum	Sphecodogastra	freygessneri	(Alfken, 1905, Halictus)
Acu	1496	valid	species	fulvicorne (Kirby, 1802, Melitta)	APOIDEA	Halictidae	Halictinae		Lasioglossum	Sphecodogastra	fulvicorne	(Kirby, 1802)		England, Scotland, Wales	Melitta
Acu	1497	invalid	species	subfasciatum misident.	APOIDEA	Halictidae	Halictinae		Lasioglossum	Sphecodogastra	subfasciatum	misident.
Acu	1498	valid	species	laeve (Kirby, 1802, Melitta)	APOIDEA	Halictidae	Halictinae		Lasioglossum	Sphecodogastra	laeve	(Kirby, 1802)	Probably extinct in Britain.	England	Melitta
Acu	1499	valid	species	laticeps (Schenck, 1869, Halictus)	APOIDEA	Halictidae	Halictinae		Lasioglossum	Sphecodogastra	laticeps	(Schenck, 1869)		England	Halictus
Acu	1500	invalid	species	semipunctulatum misident.	APOIDEA	Halictidae	Halictinae		Lasioglossum	Sphecodogastra	semipunctulatum	misident.
Acu	1501	valid	species	malachurum (Kirby, 1802, Melitta)	APOIDEA	Halictidae	Halictinae		Lasioglossum	Sphecodogastra	malachurum	(Kirby, 1802)		England	Melitta
Acu	1502	invalid	species	longulum (Smith, 1848, Halictus)	APOIDEA	Halictidae	Halictinae		Lasioglossum	Sphecodogastra	longulum	(Smith, 1848, Halictus)
Acu	1510	valid	species	pauxillum (Schenck, 1853, Hylaeus)	APOIDEA	Halictidae	Halictinae		Lasioglossum	Evylaeus	pauxillum	(Schenck, 1853)		England, Wales	Hylaeus
Acu	1511	invalid	species	immarginatum (Schenck, 1853, Hylaeus)	APOIDEA	Halictidae	Halictinae		Lasioglossum	Evylaeus	immarginatum	(Schenck, 1853, Hylaeus)
Acu	1538	valid	genus	SPHECODES Latreille, 1804	APOIDEA	Halictidae	Halictinae		Sphecodes			Latreille, 1804
Acu	1539	valid	species	crassus Thomson, 1870	APOIDEA	Halictidae	Halictinae		Sphecodes		crassus	Thomson, 1870		England, Scotland, Wales
Acu	1540	invalid	species	variegatus von Hagens, 1874	APOIDEA	Halictidae	Halictinae		Sphecodes		variegatus	von Hagens, 1874
Acu	1541	valid	species	ephippius (Linnaeus, 1767, Sphex)	APOIDEA	Halictidae	Halictinae		Sphecodes		ephippius	(Linnaeus, 1767)		England, Wales, Isle of Man	Sphex
Acu	1542	invalid	species	divisus (Kirby, 1802, Melitta)	APOIDEA	Halictidae	Halictinae		Sphecodes		divisus	(Kirby, 1802, Melitta)
Acu	1543	invalid	species	similis Wesmael, 1835	APOIDEA	Halictidae	Halictinae		Sphecodes		similis	Wesmael, 1835
Acu	1544	valid	species	ferruginatus von Hagens, 1882	APOIDEA	Halictidae	Halictinae		Sphecodes		ferruginatus	von Hagens, 1882		England, Wales
Acu	1545	valid	species	geoffrellus (Kirby, 1802, Melitta)	APOIDEA	Halictidae	Halictinae		Sphecodes		geoffrellus	(Kirby, 1802)		England, Scotland, Wales, Ireland, Isle of Man	Melitta
Acu	1546	invalid	species	affinis von Hagens, 1882	APOIDEA	Halictidae	Halictinae		Sphecodes		affinis	von Hagens, 1882
Acu	1547	invalid	species	fasciatus von Hagens, 1882	APOIDEA	Halictidae	Halictinae		Sphecodes		fasciatus	von Hagens, 1882
Acu	1548	valid	species	gibbus (Linnaeus, 1758, Sphex)	APOIDEA	Halictidae	Halictinae		Sphecodes		gibbus	(Linnaeus, 1758)		England, Scotland, Wales	Sphex
Acu	1549	invalid	species	picea (Kirby, 1802, Melitta)	APOIDEA	Halictidae	Halictinae		Sphecodes		picea	(Kirby, 1802, Melitta)
Acu	1550	invalid	species	sphecoides (Kirby, 1802, Melitta)	APOIDEA	Halictidae	Halictinae		Sphecodes		sphecoides	(Kirby, 1802, Melitta)
Acu	1551	valid	species	hyalinatus von Hagens, 1882	APOIDEA	Halictidae	Halictinae		Sphecodes		hyalinatus	von Hagens, 1882		England, Scotland, Wales, Ireland
Acu	1552	valid	species	longulus von Hagens, 1882	APOIDEA	Halictidae	Halictinae		Sphecodes		longulus	von Hagens, 1882		England, Wales
Acu	1553	valid	species	miniatus von Hagens, 1882	APOIDEA	Halictidae	Halictinae		Sphecodes		miniatus	von Hagens, 1882		England
Acu	1554	invalid	species	dimidiatus von Hagens, 1882	APOIDEA	Halictidae	Halictinae		Sphecodes		dimidiatus	von Hagens, 1882
Acu	1555	valid	species	monilicornis (Kirby, 1802, Melitta)	APOIDEA	Halictidae	Halictinae		Sphecodes		monilicornis	(Kirby, 1802)		England, Scotland, Wales, Ireland, Isle of Man	Melitta
Acu	1556	invalid	species	subquadratus Smith, 1845	APOIDEA	Halictidae	Halictinae		Sphecodes		subquadratus	Smith, 1845
Acu	1557	valid	species	niger von Hagens, 1874	APOIDEA	Halictidae	Halictinae		Sphecodes		niger	von Hagens, 1874		England
Acu	1558	valid	species	pellucidus Smith, 1845	APOIDEA	Halictidae	Halictinae		Sphecodes		pellucidus	Smith, 1845		England, Scotland, Wales, Ireland
Acu	1559	invalid	species	pilifrons Thomson, 1870	APOIDEA	Halictidae	Halictinae		Sphecodes		pilifrons	Thomson, 1870
Acu	1560	valid	species	puncticeps Thomson, 1870	APOIDEA	Halictidae	Halictinae		Sphecodes		puncticeps	Thomson, 1870		England, Wales
Acu	1561	valid	species	reticulatus Thomson, 1870	APOIDEA	Halictidae	Halictinae		Sphecodes		reticulatus	Thomson, 1870		England, Wales
Acu	1562	valid	species	rubicundus von Hagens, 1875	APOIDEA	Halictidae	Halictinae		Sphecodes		rubicundus	von Hagens, 1875		England, Wales
Acu	1563	invalid	species	ruficrus misident.	APOIDEA	Halictidae	Halictinae		Sphecodes		ruficrus	misident.
Acu	1564	invalid	species	rufiventris misident.	APOIDEA	Halictidae	Halictinae		Sphecodes		rufiventris	misident.
Acu	1565	valid	species	scabricollis Wesmael, 1835	APOIDEA	Halictidae	Halictinae		Sphecodes		scabricollis	Wesmael, 1835		England, Wales
Acu	1566	valid	species	spinulosus von Hagens, 1875	APOIDEA	Halictidae	Halictinae		Sphecodes		spinulosus	von Hagens, 1875		England, Wales
Acu	1568	valid	Subfamily	ROPHITINAE Schenck, 1866	APOIDEA	Halictidae	Rophitinae					Schenck, 1866
Acu	1570	valid	genus	DUFOUREA Lepeletier, 1841	APOIDEA	Halictidae	ROPHITINAE		Dufourea			Lepeletier, 1841
Acu	1571	valid	species	halictula (Nylander, 1852, Rhophites)	APOIDEA	Halictidae	ROPHITINAE		Dufourea		halictula	(Nylander, 1852)		England	Rhophites
Acu	1572	valid	species	minuta Lepeletier, 1841	APOIDEA	Halictidae	ROPHITINAE		Dufourea		minuta	Lepeletier, 1841		England
Acu	1573	invalid	species	vulgaris Schenck, 1861	APOIDEA	Halictidae	ROPHITINAE		Dufourea		vulgaris	Schenck, 1861
Acu	1575	valid	genus	ROPHITES Spinola, 1808	APOIDEA	Halictidae	ROPHITINAE		Rophites			Spinola, 1808
Acu	1576	valid	species	quinquespinosus Spinola, 1808 E	APOIDEA	Halictidae	ROPHITINAE		Rophites		quinquespinosus	Spinola, 1808	Probably extinct in Britain.	England
Acu	1578	valid	Family	Megachilidae Latreille, 1802	APOIDEA	Megachilidae						Latreille, 1802
Acu	1580	valid	Subfamily	Megachilinae Latreille, 1802	APOIDEA	Megachilidae	Megachilinae					Latreille, 1802
Acu	1582	valid	tribe	ANTHIDIINI Ashmead, 1899	APOIDEA	Megachilidae	Megachilinae	Anthidiini				Ashmead, 1899
Acu	1584	valid	genus	ANTHIDIUM Fabricius, 1804	APOIDEA	Megachilidae	Megachilinae	Anthidiini	Anthidium			Fabricius, 1804
Acu	1585	valid	species	manicatum (Linnaeus, 1758, Apis)	APOIDEA	Megachilidae	Megachilinae	Anthidiini	Anthidium		manicatum	(Linnaeus, 1758)	Represented by the subspecies nigrithorax Dalla Torre, 1877	England, Scotland, Wales	Apis
Acu	1587	valid	genus	STELIS Panzer, 1806	APOIDEA	Megachilidae	Megachilinae	Anthidiini	Stelis			Panzer, 1806
Acu	1588	valid	species	breviuscula Nylander, 1848	APOIDEA	Megachilidae	Megachilinae	Anthidiini	Stelis		breviuscula	Nylander, 1848	added by Else & Spooner (1987)	England
Acu	1589	valid	species	ornatula (Klug, 1807, Gyrodroma)	APOIDEA	Megachilidae	Megachilinae	Anthidiini	Stelis		ornatula	(Klug, 1807)		England, Wales	Gyrodroma
Acu	1590	invalid	species	octomaculata Smith, 1843	APOIDEA	Megachilidae	Megachilinae	Anthidiini	Stelis		octomaculata	Smith, 1843
Acu	1591	valid	species	phaeoptera (Kirby, 1802, Apis)	APOIDEA	Megachilidae	Megachilinae	Anthidiini	Stelis		phaeoptera	(Kirby, 1802)		England, Wales	Apis
Acu	1592	valid	species	punctulatissima (Kirby, 1802, Apis)	APOIDEA	Megachilidae	Megachilinae	Anthidiini	Stelis		punctulatissima	(Kirby, 1802)		England, Scotland, Wales	Apis
Acu	1593	invalid	species	aterrima (Panzer, 1798, Apis) preocc.	APOIDEA	Megachilidae	Megachilinae	Anthidiini	Stelis		aterrima	(Panzer, 1798, Apis) preocc.
Acu	1595	valid	tribe	MegachilinI Latreille, 1802	APOIDEA	Megachilidae	Megachilinae	Megachilini				Latreille, 1802
Acu	1597	valid	genus	COELIOXYS Latreille, 1809	APOIDEA	Megachilidae	Megachilinae	Megachilini	Coelioxys			Latreille, 1809
Acu	1598	valid	subgenus	ALLOCOELIOXYS	APOIDEA	Megachilidae	Megachilinae	Megachilini	Coelioxys	Allocoelioxys
Acu	1599	valid	species	afra Lepeletier, 1841	APOIDEA	Megachilidae	Megachilinae	Megachilini	Coelioxys	Allocoelioxys	afra	Lepeletier, 1841	Probably extinct in Britain.
		valid	species	afra Lepeletier, 1841	APOIDEA	Megachilidae	Megachilinae	Megachilini	Coelioxys	Boreocoelioxys		Mitchell, 1973
Acu	1606	valid	species	inermis (Kirby, 1802, Apis)	APOIDEA	Megachilidae	Megachilinae	Megachilini	Coelioxys	Boreocoelioxys	inermis	(Kirby, 1802)		England, Wales, Ireland	Apis
Acu	1608	invalid	species	acuminata Nylander, 1852	APOIDEA	Megachilidae	Megachilinae	Megachilini	Coelioxys	Boreocoelioxys	acuminata	Nylander, 1852
Acu	1609	valid	species	mandibularis Nylander, 1848	APOIDEA	Megachilidae	Megachilinae	Megachilini	Coelioxys	Boreocoelioxys	mandibularis	Nylander, 1848		England, Wales
Acu	1611	valid	species	rufescens Lepeletier & Serville, 1825	APOIDEA	Megachilidae	Megachilinae	Megachilini	Coelioxys	Boreocoelioxys	rufescens	Lepeletier & Serville, 1825		England, Wales
Acu	1612	invalid	species	umbrina Smith, 1843	APOIDEA	Megachilidae	Megachilinae	Megachilini	Coelioxys	Boreocoelioxys	umbrina	Smith, 1843
Acu	1601	valid	subgenus	COELIOXYS Latreille, 1809	APOIDEA	Megachilidae	Megachilinae	Megachilini	Coelioxys	Coelioxys		Latreille, 1809
Acu	1602	valid	species	conoidea (Illiger, 1806, Anthophora)	APOIDEA	Megachilidae	Megachilinae	Megachilini	Coelioxys	Coelioxys	conoidea	(Illiger, 1806)		England, Wales, Ireland	Anthophora
Acu	1603	invalid	species	vectis Curtis, 1831	APOIDEA	Megachilidae	Megachilinae	Megachilini	Coelioxys	Coelioxys	vectis	Curtis, 1831
Acu	1604	valid	species	elongata Lepeletier, 1841	APOIDEA	Megachilidae	Megachilinae	Megachilini	Coelioxys	Coelioxys	elongata	Lepeletier, 1841		England, Scotland, Wales, Ireland
Acu	1605	invalid	species	sponsa Smith, 1855	APOIDEA	Megachilidae	Megachilinae	Megachilini	Coelioxys	Coelioxys	sponsa	Smith, 1855
Acu	1610	valid	species	quadridentata (Linnaeus, 1758, Apis)	APOIDEA	Megachilidae	Megachilinae	Megachilini	Coelioxys	Coelioxys	quadridentata	(Linnaeus, 1758)		England, Wales	Apis
Acu	1620	valid	genus	MEGACHILE Latreille, 1802	APOIDEA	Megachilidae	Megachilinae	Megachilini	Megachile			Latreille, 1802
Acu	1621	valid	subgenus	DELOMEGACHILE Viereck, 1916	APOIDEA	Megachilidae	Megachilinae	Megachilini	Megachile	Delomegachile		Viereck, 1916
Acu	1622	valid	species	willughbiella (Kirby, 1802, Apis)	APOIDEA	Megachilidae	Megachilinae	Megachilini	Megachile	Delomegachile	willughbiella	(Kirby, 1802)	Includes the nominate subspecies and hibernica Perkins, 1925	England, Scotland, Wales, Ireland, Isle of Man	Apis
Acu	1624	valid	subgenus	EUTRICHARAEA Thomson, 1872	APOIDEA	Megachilidae	Megachilinae	Megachilini	Megachile	Eutricharaea		Thomson, 1872
Acu	1625	valid	species	leachella Curtis, 1828	APOIDEA	Megachilidae	Megachilinae	Megachilini	Megachile	Eutricharaea	leachella	Curtis, 1828		England, Wales
Acu	1626	invalid	species	dorsalis Pérez, 1879	APOIDEA	Megachilidae	Megachilinae	Megachilini	Megachile	Eutricharaea	dorsalis	Pérez, 1879	Gusenleitner & Schwarz (2012b)
Acu	1627	invalid	species	argentata misident.	APOIDEA	Megachilidae	Megachilinae	Megachilini	Megachile	Eutricharaea	argentata	misident.
Acu	1629	valid	subgenus	MEGACHILE Latreille, 1802	APOIDEA	Megachilidae	Megachilinae	Megachilini	Megachile	Megachile		Latreille, 1802
Acu	1630	valid	species	centuncularis (Linnaeus, 1758, Apis)	APOIDEA	Megachilidae	Megachilinae	Megachilini	Megachile	Megachile	centuncularis	(Linnaeus, 1758)		England, Scotland, Wales, Ireland, Isle of Man	Apis
Acu	1631	valid	species	lapponica Thomson, 1872 E	APOIDEA	Megachilidae	Megachilinae	Megachilini	Megachile	Megachile	lapponica	Thomson, 1872	Probably extinct in Britain.	England
Acu	1632	valid	species	ligniseca (Kirby, 1802, Apis)	APOIDEA	Megachilidae	Megachilinae	Megachilini	Megachile	Megachile	ligniseca	(Kirby, 1802)		England, Wales, Ireland	Apis
Acu	1633	valid	species	versicolor Smith, 1844	APOIDEA	Megachilidae	Megachilinae	Megachilini	Megachile	Megachile	versicolor	Smith, 1844	Includes the subspecies hiberniae Perkins, 1925.	England, Scotland, Wales, Ireland, Isle of Man
Acu	1615	valid	subgenus	PSEUDOMEGACHILE Friese, 1899	APOIDEA	Megachilidae	Megachilinae	Megachilini	Chalicodoma	Pseudomegachile		Friese, 1899
Acu	1616	valid	species	ericetorum (Lepeletier, 1841, Megachile)	APOIDEA	Megachilidae	Megachilinae	Megachilini	Chalicodoma	Pseudomegachile	ericetorum	(Lepeletier, 1841)	Probably extinct in Britain.	England	Megachile
Acu	1617	invalid	species	fasciata (Smith, 1844, Megachile)	APOIDEA	Megachilidae	Megachilinae	Megachilini	Chalicodoma	Pseudomegachile	fasciata	(Smith, 1844, Megachile)
Acu	1618	invalid	species	rufitarsis (Smith, 1844, Megachile)	APOIDEA	Megachilidae	Megachilinae	Megachilini	Chalicodoma	Pseudomegachile	rufitarsis	(Smith, 1844, Megachile)
Acu	1635	valid	subgenus	XANTHOSARUS Robertson, 1903	APOIDEA	Megachilidae	Megachilinae	Megachilini	Megachile	Xanthosarus		Robertson, 1903
Acu	1636	valid	species	circumcincta (Kirby, 1802, Apis)	APOIDEA	Megachilidae	Megachilinae	Megachilini	Megachile	Xanthosarus	circumcincta	(Kirby, 1802)		England, Scotland, Wales	Apis
Acu	1637	valid	species	maritima (Kirby, 1802, Apis)	APOIDEA	Megachilidae	Megachilinae	Megachilini	Megachile	Xanthosarus	maritima	(Kirby, 1802)		England, Wales, Ireland, Isle of Man	Apis
Acu	1639	valid	tribe	OSMIINI Newman, 1834	APOIDEA	Megachilidae	Megachilinae	Osmiini				Newman, 1834
Acu	1641	valid	genus	CHELOSTOMA Latreille, 1809	APOIDEA	Megachilidae	Megachilinae	Osmiini	Chelostoma			Latreille, 1809
Acu	1642	valid	species	campanularum (Kirby, 1802, Apis)	APOIDEA	Megachilidae	Megachilinae	Osmiini	Chelostoma		campanularum	(Kirby, 1802)		England	Apis
Acu	1643	valid	species	florisomne (Linnaeus, 1758, Apis)	APOIDEA	Megachilidae	Megachilinae	Osmiini	Chelostoma		florisomne	(Linnaeus, 1758)		England, Wales	Apis
Acu	1644	invalid	species	maxillosum (Linnaeus, 1767, Apis)	APOIDEA	Megachilidae	Megachilinae	Osmiini	Chelostoma		maxillosum	(Linnaeus, 1767, Apis)
Acu	1646	valid	genus	HERIADES Spinola, 1808	APOIDEA	Megachilidae	Megachilinae	Osmiini	Heriades			Spinola, 1808
Acu	1647	valid	species	rubicola Peréz, 1890	APOIDEA	Megachilidae	Megachilinae	Osmiini	Heriades		rubicola	Peréz, 1890	added by Else (in prep.)	England
Acu	1648	valid	species	truncorum (Linnaeus, 1758, Apis)	APOIDEA	Megachilidae	Megachilinae	Osmiini	Heriades		truncorum	(Linnaeus, 1758)		England	Apis
Acu	1650	valid	genus	HOPLITIS Klug, 1807	APOIDEA	Megachilidae	Megachilinae	Osmiini	Hoplitis			Klug, 1807
Acu	1651	valid	subgenus	ALCIDAMEA	APOIDEA	Megachilidae	Megachilinae	Osmiini	Hoplitis	Alcidamea
Acu	1652	valid	species	claviventris (Thomson, 1872, Osmia)	APOIDEA	Megachilidae	Megachilinae	Osmiini	Hoplitis	Alcidamea	claviventris	(Thomson, 1872)		England, Wales	Osmia
Acu	1653	invalid	species	leucomelana misident.	APOIDEA	Megachilidae	Megachilinae	Osmiini	Hoplitis	Alcidamea	leucomelana	misident.
Acu	1654	valid	species	leucomelana (Kirby, 1802, Apis)	APOIDEA	Megachilidae	Megachilinae	Osmiini	Hoplitis	Alcidamea	leucomelana	(Kirby, 1802)	Probably extinct in Britain.	England	Apis
Acu	1655	invalid	species	parvula (Dufour & Perris, 1840, Osmia)	APOIDEA	Megachilidae	Megachilinae	Osmiini	Hoplitis	Alcidamea	parvula	(Dufour & Perris, 1840, Osmia)
Acu	1657	valid	genus	OSMIA Panzer, 1806	APOIDEA	Megachilidae	Megachilinae	Osmiini	Hoplitis			Panzer, 1806
Acu	1658	valid	subgenus	ANTHOCOPA Lepeletier & Serville, 1825	APOIDEA	Megachilidae	Megachilinae	Osmiini	Hoplitis	Anthocopa		Lepeletier & Serville, 1825
Acu	1659	valid	species	spinulosa (Kirby, 1802, Apis)	APOIDEA	Megachilidae	Megachilinae	Osmiini	Hoplitis	Anthocopa	spinulosa	(Kirby, 1802)		England, Wales	Apis
Acu	1661	valid	subgenus	CHALCOSMIA Schmiedeknecht, 1884	APOIDEA	Megachilidae	Megachilinae	Osmiini	Osmia	Chalcosmia		Schmiedeknecht, 1884
Acu	1662	valid	species	caerulescens (Linnaeus, 1758, Apis)	APOIDEA	Megachilidae	Megachilinae	Osmiini	Osmia	Chalcosmia	caerulescens	(Linnaeus, 1758)		England, Scotland, Wales	Apis
Acu	1663	invalid	species	aenea (Linnaeus, 1761, Apis)	APOIDEA	Megachilidae	Megachilinae	Osmiini	Osmia	Chalcosmia	aenea	(Linnaeus, 1761, Apis)
Acu	1664	valid	species	niveata (Fabricius, 1804, Apis)	APOIDEA	Megachilidae	Megachilinae	Osmiini	Osmia	Chalcosmia	niveata	(Fabricius, 1804)		England	Apis
Acu	1665	invalid	species	fulviventris (Panzer, 1798, Apis)	APOIDEA	Megachilidae	Megachilinae	Osmiini	Osmia	Chalcosmia	fulviventris	(Panzer, 1798, Apis)
Acu	1666	valid	species	leaiana (Kirby, 1802, Apis)	APOIDEA	Megachilidae	Megachilinae	Osmiini	Osmia	Chalcosmia	leaiana	(Kirby, 1802)		England, Wales	Apis
Acu	1667	invalid	species	fulviventris misident.	APOIDEA	Megachilidae	Megachilinae	Osmiini	Osmia	Chalcosmia	fulviventris	misident.
Acu	1669	valid	subgenus	HELICOSMIA Thomson, 1872	APOIDEA	Megachilidae	Megachilinae	Osmiini	Osmia	Helicosmia		Thomson, 1872
Acu	1670	valid	species	aurulenta Panzer, 1799	APOIDEA	Megachilidae	Megachilinae	Osmiini	Osmia	Helicosmia	aurulenta	Panzer, 1799		England, Scotland, Wales, Ireland
Acu	1672	valid	subgenus	MELANOSMIA Schmiedeknecht, 1884	APOIDEA	Megachilidae	Megachilinae	Osmiini	Osmia	Melanosmia		Schmiedeknecht, 1884
Acu	1673	valid	species	inermis (Zetterstedt, 1838, Anthophora)	APOIDEA	Megachilidae	Megachilinae	Osmiini	Osmia	Melanosmia	inermis	(Zetterstedt, 1838)		Scotland	Anthophora
Acu	1674	invalid	species	parietina misident.	APOIDEA	Megachilidae	Megachilinae	Osmiini	Osmia	Melanosmia	parietina	misident.
Acu	1675	valid	species	parietina Curtis, 1828	APOIDEA	Megachilidae	Megachilinae	Osmiini	Osmia	Melanosmia	parietina	Curtis, 1828		England, Scotland, Wales
Acu	1676	valid	species	pilicornis Smith, 1846	APOIDEA	Megachilidae	Megachilinae	Osmiini	Osmia	Melanosmia	pilicornis	Smith, 1846		England, Wales
Acu	1677	valid	species	uncinata Gerstäcker, 1869	APOIDEA	Megachilidae	Megachilinae	Osmiini	Osmia	Melanosmia	uncinata	Gerstäcker, 1869	added by Else in Else & Spooner (1987)	Scotland
Acu	1678	valid	species	xanthomelana (Kirby, 1802, Apis)	APOIDEA	Megachilidae	Megachilinae	Osmiini	Osmia	Melanosmia	xanthomelana	(Kirby, 1802)		England, Wales	Apis
Acu	1679	invalid	species	atricapilla Curtis, 1828	APOIDEA	Megachilidae	Megachilinae	Osmiini	Osmia	Melanosmia	atricapilla	Curtis, 1828
Acu	1681	valid	subgenus	NEOSMIA Tkalc , 1974	APOIDEA	Megachilidae	Megachilinae	Osmiini	Osmia	Neosmia		Tkalc, 1974
Acu	1682	valid	species	bicolor (Schrank, 1781, Apis)	APOIDEA	Megachilidae	Megachilinae	Osmiini	Osmia	Neosmia	bicolor	(Schrank, 1781)		England, Wales	Apis
Acu	1684	valid	subgenus	OSMIA Panzer, 1806	APOIDEA	Megachilidae	Megachilinae	Osmiini	Osmia	Osmia		Panzer, 1806
Acu	1685	valid	species	bicornis (Linnaeus, 1758, Apis)	APOIDEA	Megachilidae	Megachilinae	Osmiini	Osmia	Osmia	bicornis	(Linnaeus, 1758)		England, Scotland, Wales, Ireland	Apis
Acu	1686	invalid	species	rufa (Linnaeus, 1758, Apis)	APOIDEA	Megachilidae	Megachilinae	Osmiini	Osmia	Osmia	rufa	(Linnaeus, 1758, Apis)		England, Scotland, Wales
Acu	1687	invalid	species	hedera Smith, 1844	APOIDEA	Megachilidae	Megachilinae	Osmiini	Osmia	Osmia	hedera	Smith, 1844
Acu	1689	valid	Family	Melittidae Schenck, 1860	APOIDEA	Melittidae						Schenck, 1860
Acu	1691	valid	Subfamily	DASYPODAINAE Börner, 1919	APOIDEA	Melittidae	Dasypodainae					Börner, 1919	According to Danforth et al. (2006), Dasypodainae may be better treated as a separate family, but this requires further corroboration.
Acu	1693	valid	genus	DASYPODA Latreille, 1802	APOIDEA	Melittidae	Dasypodainae		Dasypoda			Latreille, 1802
Acu	1694	valid	species	hirtipes (Fabricius, 1793, Andrena)	APOIDEA	Melittidae	Dasypodainae		Dasypoda		hirtipes	(Fabricius, 1793)		England, Wales	Andrena
Acu	1695	invalid	species	?altercator (Harris, 1776, Apis) nom. dub.	APOIDEA	Melittidae	Dasypodainae		Dasypoda		?altercator	(Harris, 1776, Apis) nom. dub.
Acu	1696	invalid	species	plumipes (Panzer, 1797, Andrena)	APOIDEA	Melittidae	Dasypodainae		Dasypoda		plumipes	(Panzer, 1797, Andrena)
Acu	1697	invalid	species	swammerdamella (Kirby, 1802, Melitta)	APOIDEA	Melittidae	Dasypodainae		Dasypoda		swammerdamella	(Kirby, 1802, Melitta)
Acu	1699	valid	Subfamily	MACROPIDINAE Robertson, 1904	APOIDEA	Melittidae	Macropidinae					Robertson, 1904
Acu	1701	valid	genus	MACROPIS Panzer, 1809	APOIDEA	Melittidae	MACROPIDINAE		Macropis			Panzer, 1809
Acu	1702	valid	species	europaea Warncke, 1973	APOIDEA	Melittidae	MACROPIDINAE		Macropis		europaea	Warncke, 1973		England
Acu	1703	invalid	species	labiata misident.	APOIDEA	Melittidae	MACROPIDINAE		Macropis		labiata	misident.
Acu	1705	valid	Subfamily	Melittinae Schenck, 1860	APOIDEA	Melittidae	Melittinae					Schenck, 1860
Acu	1707	valid	genus	MELITTA Kirby, 1802	APOIDEA	Melittidae	Melittinae		Melitta			Kirby, 1802
Acu	1708	invalid	genus	PSEUDOCILISSA Radoszkowski, 1891	APOIDEA	Melittidae	Melittinae		PSEUDOCILISSA			Radoszkowski, 1891
Acu	1709	valid	species	dimidiata Morawitz, 1876	APOIDEA	Melittidae	Melittinae		Melitta		dimidiata	Morawitz, 1876		England
Acu	1710	valid	species	haemorrhoidalis (Fabricius, 1775, Andrena)	APOIDEA	Melittidae	Melittinae		Melitta		haemorrhoidalis	(Fabricius, 1775)		England, Scotland, Wales, Isle of Man	Andrena
Acu	1711	invalid	species	chrysura Kirby, 1802	APOIDEA	Melittidae	Melittinae		Melitta		chrysura	Kirby, 1802
Acu	1712	valid	species	leporina (Panzer, 1799, Apis)	APOIDEA	Melittidae	Melittinae		Melitta		leporina	(Panzer, 1799)		England, Wales	Apis
Acu	1713	valid	species	tricincta Kirby, 1802	APOIDEA	Melittidae	Melittinae		Melitta		tricincta	Kirby, 1802		England, Wales
Acu	1714	invalid	species	melanura (Nylander, 1852, Kirbya)	APOIDEA	Melittidae	Melittinae		Melitta		melanura	(Nylander, 1852, Kirbya)
Acu	1716	valid	Superfamily	CHRYSIDOIDEA	CHRYSIDOIDEA								Some distribution records taken from Archer & Burn (2012).
Acu	1718	valid	Family	Bethylidae Haliday, 1833	CHRYSIDOIDEA	Bethylidae						Haliday, 1833	Taxonomy mostly follows Gordh & Móczár (1990). Distribution data from Perkins (1976).
Acu	1720	valid	Subfamily	Bethylinae Haliday, 1833	CHRYSIDOIDEA	Bethylidae	Bethylinae					Haliday, 1833
Acu	1722	valid	genus	BETHYLUS Latreille, 1802	CHRYSIDOIDEA	Bethylidae	Bethylinae		Bethylus			Latreille, 1802
Acu	1723	invalid	genus	PERISEMUS Förster, 1856	CHRYSIDOIDEA	Bethylidae	Bethylinae		PERISEMUS			Förster, 1856
Acu	1724	invalid	genus	ANOXUS Thomson, 1862	CHRYSIDOIDEA	Bethylidae	Bethylinae		ANOXUS			Thomson, 1862	Polaszek & Krombein (1994)
Acu	1725	invalid	genus	EPISEMUS Thomson, 1862	CHRYSIDOIDEA	Bethylidae	Bethylinae		EPISEMUS			Thomson, 1862
Acu	1726	invalid	genus	DIGONIOZUS Kieffer, 1905	CHRYSIDOIDEA	Bethylidae	Bethylinae		DIGONIOZUS			Kieffer, 1905
Acu	1727	valid	species	boops (Thomson, 1862, Anoxus)	CHRYSIDOIDEA	Bethylidae	Bethylinae		Bethylus		boops	(Thomson, 1862)	added by Burn (1997)	England	Anoxus
Acu	1728	valid	species	cephalotes (Förster, 1860, Perisemus)	CHRYSIDOIDEA	Bethylidae	Bethylinae		Bethylus		cephalotes	(Förster, 1860)		England, Scotland, Wales, Isle of Man	Perisemus
Acu	1729	invalid	species	fuscicornis var. tibialis Kieffer, 1905	CHRYSIDOIDEA	Bethylidae	Bethylinae		Bethylus		fuscicornis var. tibialis	Kieffer, 1905
Acu	1730	valid	species	dendrophilus Richards, 1939	CHRYSIDOIDEA	Bethylidae	Bethylinae		Bethylus		dendrophilus	Richards, 1939		England
Acu	1731	valid	species	fuscicornis (Jurine, 1807, Omalus)	CHRYSIDOIDEA	Bethylidae	Bethylinae		Bethylus		fuscicornis	(Jurine, 1807)		England, Scotland, Wales	Omalus
Acu	1732	invalid	species	sygenesiae Haliday, 1834	CHRYSIDOIDEA	Bethylidae	Bethylinae		Bethylus		sygenesiae	Haliday, 1834
Acu	1733	invalid	species	fulvicornis Curtis, 1838	CHRYSIDOIDEA	Bethylidae	Bethylinae		Bethylus		fulvicornis	Curtis, 1838
Acu	1734	invalid	species	triareolatus Förster, 1851	CHRYSIDOIDEA	Bethylidae	Bethylinae		Bethylus		triareolatus	Förster, 1851
Acu	1735	invalid	species	variabilis (Thomson, 1862, Episemus)	CHRYSIDOIDEA	Bethylidae	Bethylinae		Bethylus		variabilis	(Thomson, 1862, Episemus)
Acu	1736	invalid	species	hyalinus (Marshall, 1874, Perisemus)	CHRYSIDOIDEA	Bethylidae	Bethylinae		Bethylus		hyalinus	(Marshall, 1874, Perisemus)	de Rond (1994)
Acu	1737	invalid	species	fuscicornis var. maurus Kieffer, 1905	CHRYSIDOIDEA	Bethylidae	Bethylinae		Bethylus		fuscicornis var. maurus	Kieffer, 1905
Acu	1738	invalid	species	brevipennis Hellén, 1920	CHRYSIDOIDEA	Bethylidae	Bethylinae		Bethylus		brevipennis	Hellén, 1920
Acu	1739	invalid	species	berlandi Arle, 1929	CHRYSIDOIDEA	Bethylidae	Bethylinae		Bethylus		berlandi	Arle, 1929
Acu	1741	valid	genus	GONIOZUS Förster, 1856	CHRYSIDOIDEA	Bethylidae	Bethylinae		Goniozus			Förster, 1856
Acu	1742	invalid	genus	PARASIEROLA Cameron, 1883	CHRYSIDOIDEA	Bethylidae	Bethylinae		PARASIEROLA			Cameron, 1883
Acu	1743	invalid	genus	PROGONIOZUS Kieffer, 1905	CHRYSIDOIDEA	Bethylidae	Bethylinae		PROGONIOZUS			Kieffer, 1905
Acu	1744	invalid	genus	PERISIEROLA Kieffer, 1914	CHRYSIDOIDEA	Bethylidae	Bethylinae		PERISIEROLA			Kieffer, 1914
Acu	1745	valid	species	claripennis (Förster, 1851, Bethylus)	CHRYSIDOIDEA	Bethylidae	Bethylinae		Goniozus		claripennis	(Förster, 1851)		England	Bethylus
Acu	1746	invalid	species	fuscipennis (Förster, 1851, Bethylus)	CHRYSIDOIDEA	Bethylidae	Bethylinae		Goniozus		fuscipennis	(Förster, 1851, Bethylus)
Acu	1747	invalid	species	distigmus Thomson, 1862	CHRYSIDOIDEA	Bethylidae	Bethylinae		Goniozus		distigmus	Thomson, 1862
Acu	1748	invalid	species	audouinii Westwood, 1874	CHRYSIDOIDEA	Bethylidae	Bethylinae		Goniozus		audouinii	Westwood, 1874
Acu	1749	invalid	species	claripennis var. fuscipennis Kieffer, 1905 preocc.	CHRYSIDOIDEA	Bethylidae	Bethylinae		Goniozus		claripennis var. fuscipennis	Kieffer, 1905 preocc.
Acu	1750	invalid	species	claripennis var. tibialis Kieffer, 1905	CHRYSIDOIDEA	Bethylidae	Bethylinae		Goniozus		claripennis var. tibialis	Kieffer, 1905
Acu	1752	valid	Subfamily	Epyrinae Kieffer, 1914	CHRYSIDOIDEA	Bethylidae	Epyrinae					Kieffer, 1914
Acu	1754	valid	genus	ALLEPYRIS Kieffer, 1906	CHRYSIDOIDEA	Bethylidae	Epyrinae		Laelius			Ashmead, 1893	Synonymy and distribution data from Notton et al. (2014).
		valid	species		CHRYSIDOIDEA	Bethylidae	Epyrinae		Laelius		femoralis	(Förster, 1860)			Bethylus
Acu	1755	invalid	species	microneurus Kieffer, 1906	CHRYSIDOIDEA	Bethylidae	Epyrinae		Laelius		microneurus	(Kieffer, 1906, Allepyris)		England
Acu	1756	invalid	species	nigricrus Kieffer, 1906	CHRYSIDOIDEA	Bethylidae	Epyrinae		Laelius		nigricrus	(Kieffer, 1906, Allepyris)
		valid	species	nigricrus Kieffer, 1906	CHRYSIDOIDEA	Bethylidae	Epyrinae		Laelius		# pedatus	(Say, 1836)	added by Notton et al. (2014)		Bethylus
Acu	1758	valid	genus	CEPHALONOMIA Westwood, 1833	CHRYSIDOIDEA	Bethylidae	Epyrinae		Cephalonomia			Westwood, 1833
Acu	1759	invalid	genus	HOLOPEDINA Förster, 1850	CHRYSIDOIDEA	Bethylidae	Epyrinae		HOLOPEDINA			Förster, 1850
Acu	1760	invalid	genus	CEPHALOMIA Kirchner, 1867	CHRYSIDOIDEA	Bethylidae	Epyrinae		CEPHALOMIA			Kirchner, 1867
Acu	1761	valid	species	formiciformis Westwood, 1833	CHRYSIDOIDEA	Bethylidae	Epyrinae		Cephalonomia		formiciformis	Westwood, 1833		England, Ireland
Acu	1762	invalid	species	polypori (Förster, 1850, Holopedina)	CHRYSIDOIDEA	Bethylidae	Epyrinae		Cephalonomia		polypori	(Förster, 1850, Holopedina)
Acu	1763	invalid	species	brevipennis Kieffer, 1906	CHRYSIDOIDEA	Bethylidae	Epyrinae		Cephalonomia		brevipennis	Kieffer, 1906	Listed as a separate species (described from English specimens, now missing) by Gordh & Móczár (1990) but we follow Richards (1939) who believed this not to be a separate species from formiciformis.
Acu	1764	invalid	species	formiciformis var. sulcata Kieffer, 1906	CHRYSIDOIDEA	Bethylidae	Epyrinae		Cephalonomia		formiciformis var. sulcata	Kieffer, 1906
Acu	1765	invalid	species	# gallicola (Ashmead, 1887, Sclerochroa)	CHRYSIDOIDEA	Bethylidae	Epyrinae		Cephalonomia		# gallicola	(Ashmead, 1887, Sclerochroa)
Acu	1766	invalid	species	nubilipennis (Ashmead, 1887, Holopedina)	CHRYSIDOIDEA	Bethylidae	Epyrinae		Cephalonomia		nubilipennis	(Ashmead, 1887, Holopedina)
Acu	1767	invalid	species	xambeui Girad, 1898	CHRYSIDOIDEA	Bethylidae	Epyrinae		Cephalonomia		xambeui	Girad, 1898
Acu	1768	invalid	species	quadridentata Duchaussoy, 1920	CHRYSIDOIDEA	Bethylidae	Epyrinae		Cephalonomia		quadridentata	Duchaussoy, 1920
Acu	1769	invalid	species	strandi Hoffer, 1936	CHRYSIDOIDEA	Bethylidae	Epyrinae		Cephalonomia		strandi	Hoffer, 1936
Acu	1770	valid	species	hammi Richards, 1939	CHRYSIDOIDEA	Bethylidae	Epyrinae		Cephalonomia		hammi	Richards, 1939		England
Acu	1771	invalid	species	# tarsalis (Ashmead, 1893, Ateleopterus)	CHRYSIDOIDEA	Bethylidae	Epyrinae		Cephalonomia		# tarsalis	(Ashmead, 1893, Ateleopterus)
Acu	1772	invalid	species	carinata Kieffer, 1907	CHRYSIDOIDEA	Bethylidae	Epyrinae		Cephalonomia		carinata	Kieffer, 1907
Acu	1773	invalid	species	meridionalis Brethes, 1913	CHRYSIDOIDEA	Bethylidae	Epyrinae		Cephalonomia		meridionalis	Brethes, 1913
Acu	1774	invalid	species	kiefferi Fouts, 1920	CHRYSIDOIDEA	Bethylidae	Epyrinae		Cephalonomia		kiefferi	Fouts, 1920
Acu	1775	invalid	species	# waterstoni Gahan, 1931	CHRYSIDOIDEA	Bethylidae	Epyrinae		Cephalonomia		# waterstoni	Gahan, 1931
Acu	1777	valid	genus	EPYRIS Westwood, 1832	CHRYSIDOIDEA	Bethylidae	Epyrinae		Epyris			Westwood, 1832
Acu	1778	invalid	genus	DOLUS Motshultsky, 1863	CHRYSIDOIDEA	Bethylidae	Epyrinae		DOLUS			Motshultsky, 1863
Acu	1779	invalid	genus	MUELLERELLA Saussure, 1892	CHRYSIDOIDEA	Bethylidae	Epyrinae		MUELLERELLA			Saussure, 1892
Acu	1780	invalid	genus	HOMOGLENUS Kieffer, 1904	CHRYSIDOIDEA	Bethylidae	Epyrinae		HOMOGLENUS			Kieffer, 1904	Terayama (2003)
Acu	1781	invalid	genus	PAREPYRIS Kieffer, 1913	CHRYSIDOIDEA	Bethylidae	Epyrinae		PAREPYRIS			Kieffer, 1913
Acu	1782	invalid	genus	PSILEPYRIS Kieffer, 1913	CHRYSIDOIDEA	Bethylidae	Epyrinae		PSILEPYRIS			Kieffer, 1913
Acu	1783	invalid	genus	ARTIEPYRIS Kieffer, 1913	CHRYSIDOIDEA	Bethylidae	Epyrinae		ARTIEPYRIS			Kieffer, 1913
Acu	1784	valid	species	bilineatus Thomson, 1862	CHRYSIDOIDEA	Bethylidae	Epyrinae		Epyris		bilineatus	Thomson, 1862		England
Acu	1785	invalid	species	fraternus Westwood, 1874	CHRYSIDOIDEA	Bethylidae	Epyrinae		Epyris		fraternus	Westwood, 1874
Acu	1786	invalid	species	saeva Westwood, 1874	CHRYSIDOIDEA	Bethylidae	Epyrinae		Epyris		saeva	Westwood, 1874
Acu	1787	invalid	species	multidentatus Keiffer, 1906	CHRYSIDOIDEA	Bethylidae	Epyrinae		Epyris		multidentatus	Keiffer, 1906
Acu	1788	invalid	species	multidentatus var. angustipennis Kieffer, 1906	CHRYSIDOIDEA	Bethylidae	Epyrinae		Epyris		multidentatus var. angustipennis	Kieffer, 1906
Acu	1789	valid	species	niger Westwood, 1832	CHRYSIDOIDEA	Bethylidae	Epyrinae		Epyris		niger	Westwood, 1832		England
Acu	1790	valid	species	[?tricolor Cameron, 1888	CHRYSIDOIDEA	Bethylidae	Epyrinae		Epyris		[?tricolor	Cameron, 1888]	Supposedly described from the New Forest, the type is lost and the species has not been satisfactorily interpreted since.
Acu	1792	valid	genus	HOLEPYRIS Kieffer, 1905	CHRYSIDOIDEA	Bethylidae	Epyrinae		Holepyris			Kieffer, 1905
Acu	1793	invalid	genus	MISEPYRIS Kieffer, 1913	CHRYSIDOIDEA	Bethylidae	Epyrinae		MISEPYRIS			Kieffer, 1913
Acu	1794	invalid	genus	PAREPYRIS Brethes, 1913	CHRYSIDOIDEA	Bethylidae	Epyrinae		PAREPYRIS			Brethes, 1913
Acu	1795	invalid	species	# glabratus (Fabricius, 1798, Tiphia)	CHRYSIDOIDEA	Bethylidae	Epyrinae		Holepyris		# glabratus	(Fabricius, 1798, Tiphia)
Acu	1796	invalid	species	hawaiiensis (Ashmead, 1901, Holepyris)	CHRYSIDOIDEA	Bethylidae	Epyrinae		Holepyris		hawaiiensis	(Ashmead, 1901, Holepyris)
Acu	1797	invalid	species	# sylvanidis (Brethes, 1913, Parepyris)	CHRYSIDOIDEA	Bethylidae	Epyrinae		Holepyris		# sylvanidis	(Brethes, 1913, Parepyris)
Acu	1798	invalid	species	zeae (Turner & Waterston, 1921, Rhabdepyris)	CHRYSIDOIDEA	Bethylidae	Epyrinae		Holepyris		zeae	(Turner & Waterston, 1921, Rhabdepyris)
Acu	1800	valid	genus	PLASTANOXUS Kieffer, 1905	CHRYSIDOIDEA	Bethylidae	Epyrinae		Plastanoxus			Kieffer, 1905
Acu	1801	invalid	genus	SNAPPANIA Hedqvist, 1975	CHRYSIDOIDEA	Bethylidae	Epyrinae		SNAPPANIA			Hedqvist, 1975
Acu	1802	valid	species	chittendenii (Ashmead, 1893, Anoxus)	CHRYSIDOIDEA	Bethylidae	Epyrinae		Plastanoxus		chittendenii	(Ashmead, 1893)		England	Anoxus
Acu	1803	invalid	species	# munroi Richards, 1939	CHRYSIDOIDEA	Bethylidae	Epyrinae		Plastanoxus		# munroi	Richards, 1939
Acu	1804	invalid	species	# westwoodi (Kieffer, 1914, Cephalonomia)	CHRYSIDOIDEA	Bethylidae	Epyrinae		Plastanoxus		# westwoodi	(Kieffer, 1914, Cephalonomia)
Acu	1805	invalid	species	kiefferi Gahan, 1931	CHRYSIDOIDEA	Bethylidae	Epyrinae		Plastanoxus		kiefferi	Gahan, 1931
Acu	1807	valid	Subfamily	Pristocerinae Kieffer, 1914	CHRYSIDOIDEA	Bethylidae	Pristocerinae					Kieffer, 1914
Acu	1809	valid	genus	PRISTOCERA Klug, 1808	CHRYSIDOIDEA	Bethylidae	Pristocerinae		Pristocera			Klug, 1808
Acu	1810	invalid	genus	ACREPYRIS Kieffer, 1905	CHRYSIDOIDEA	Bethylidae	Pristocerinae		ACREPYRIS			Kieffer, 1905
Acu	1811	invalid	genus	MANGESIA Kieffer, 1911	CHRYSIDOIDEA	Bethylidae	Pristocerinae		MANGESIA			Kieffer, 1911
Acu	1812	invalid	genus	TRICHELOBRACHIUM Kieffer, 1914	CHRYSIDOIDEA	Bethylidae	Pristocerinae		TRICHELOBRACHIUM			Kieffer, 1914
Acu	1813	valid	species	depressa (Fabricius, 1805, Bethylus)	CHRYSIDOIDEA	Bethylidae	Pristocerinae		Pristocera		depressa	(Fabricius, 1805)		England	Bethylus
Acu	1814	invalid	species	roubali (Menozzi, 1925, Pseudisobrachium)	CHRYSIDOIDEA	Bethylidae	Pristocerinae		Pristocera		roubali	(Menozzi, 1925, Pseudisobrachium)
Acu	1816	valid	genus	PSEUDISOBRACHIUM Kieffer, 1904	CHRYSIDOIDEA	Bethylidae	Pristocerinae		Pseudisobrachium			Kieffer, 1904
Acu	1817	invalid	genus	MONEPYRIS Kieffer, 1905	CHRYSIDOIDEA	Bethylidae	Pristocerinae		MONEPYRIS			Kieffer, 1905
Acu	1818	invalid	genus	XESTOBETHYLUS Cameron, 1909	CHRYSIDOIDEA	Bethylidae	Pristocerinae		XESTOBETHYLUS			Cameron, 1909
Acu	1819	invalid	genus	PLUTOBETHYLUS Kieffer, 1910	CHRYSIDOIDEA	Bethylidae	Pristocerinae		PLUTOBETHYLUS			Kieffer, 1910
Acu	1820	invalid	genus	LYSSEPYRIS Kieffer, 1913	CHRYSIDOIDEA	Bethylidae	Pristocerinae		LYSSEPYRIS			Kieffer, 1913
Acu	1821	invalid	genus	XANTEPYRIS Kieffer, 1913	CHRYSIDOIDEA	Bethylidae	Pristocerinae		XANTEPYRIS			Kieffer, 1913
Acu	1822	invalid	genus	PARISOBRACHIUM Kieffer, 1914	CHRYSIDOIDEA	Bethylidae	Pristocerinae		PARISOBRACHIUM			Kieffer, 1914
Acu	1823	invalid	genus	AFRISOBRACHIUM Benoit, 1957	CHRYSIDOIDEA	Bethylidae	Pristocerinae		AFRISOBRACHIUM			Benoit, 1957
Acu	1824	invalid	genus	EDAPHOLIGON Oglobin, 1963	CHRYSIDOIDEA	Bethylidae	Pristocerinae		EDAPHOLIGON			Oglobin, 1963
Acu	1825	valid	species	subcyaneum (Haliday, 1838, Epyris)	CHRYSIDOIDEA	Bethylidae	Pristocerinae		Pseudisobrachium		subcyaneum	(Haliday, 1838)		England	Epyris
Acu	1826	invalid	species	halidaii (Westwood, 1874, Epyris)	CHRYSIDOIDEA	Bethylidae	Pristocerinae		Pseudisobrachium		halidaii	(Westwood, 1874, Epyris)
Acu	1827	invalid	species	carpentieri Kieffer, 1906	CHRYSIDOIDEA	Bethylidae	Pristocerinae		Pseudisobrachium		carpentieri	Kieffer, 1906
Acu	1828	invalid	species	carpentieri var. septemfasciatum Kieffer, 1906	CHRYSIDOIDEA	Bethylidae	Pristocerinae		Pseudisobrachium		carpentieri var. septemfasciatum	Kieffer, 1906
Acu	1829	invalid	species	cantianum Chitty, 1906	CHRYSIDOIDEA	Bethylidae	Pristocerinae		Pseudisobrachium		cantianum	Chitty, 1906
Acu	1830	invalid	species	concolor Kieffer, 1906	CHRYSIDOIDEA	Bethylidae	Pristocerinae		Pseudisobrachium		concolor	Kieffer, 1906
Acu	1832	valid	Family	Chrysididae Latreille, 1802	CHRYSIDOIDEA	Chrysididae						Latreille, 1802
Acu	1834	valid	Subfamily	Cleptinae Morice, 1900	CHRYSIDOIDEA	Chrysididae	Cleptinae					Morice, 1900
Acu	1836	valid	genus	CLEPTES Latreille, 1802	CHRYSIDOIDEA	Chrysididae	Cleptinae		Cleptes			Latreille, 1802
Acu	1837	valid	subgenus	CLEPTES Latreille, 1802	CHRYSIDOIDEA	Chrysididae	Cleptinae		Cleptes	Cleptes		Latreille, 1802
Acu	1838	valid	species	semiauratus (Linnaeus, 1761, Sphex)	CHRYSIDOIDEA	Chrysididae	Cleptinae		Cleptes	Cleptes	semiauratus	(Linnaeus, 1761)	Synonymy follows Rosa et al. (2015).	England, Wales	Sphex
Acu	1839	invalid	species	auratus (Panzer, 1798, Ichneumon)	CHRYSIDOIDEA	Chrysididae	Cleptinae		Cleptes	Cleptes	auratus	(Panzer, 1798, Ichneumon)
Acu	1840	invalid	species	pallipes Lepeletier, 1805	CHRYSIDOIDEA	Chrysididae	Cleptinae		Cleptes	Cleptes	pallipes	Lepeletier, 1805
Acu	1841	invalid	species	diana Mocsáry, 1889	CHRYSIDOIDEA	Chrysididae	Cleptinae		Cleptes	Cleptes	diana	Mocsáry, 1889
Acu	1843	valid	subgenus	LEIOCLEPTES Móczár, 1962	CHRYSIDOIDEA	Chrysididae	Cleptinae		Cleptes	Leiocleptes		Móczár, 1962
Acu	1844	valid	species	nitidulus (Fabricius, 1793, Ichneumon)	CHRYSIDOIDEA	Chrysididae	Cleptinae		Cleptes	Leiocleptes	nitidulus	(Fabricius, 1793)		England	Ichneumon
Acu	1846	valid	Subfamily	Chrysidinae Latreille, 1802	CHRYSIDOIDEA	Chrysididae	Chrysidinae					Latreille, 1802	Some distribution data from Morgan (1984).
Acu	1848	valid	tribe	CHRYSIDINI Latreille, 1802	CHRYSIDOIDEA	Chrysididae	Chrysidinae	Chrysidini				Latreille, 1802
Acu	1850	valid	genus	CHRYSIS Linnaeus, 1761	CHRYSIDOIDEA	Chrysididae	Chrysidinae	Chrysidini	Chrysis			Linnaeus, 1761	The number of species recognised in the Chrysis ignita group has varied from author to author. Soon et al.’s (2014) analysis of species limits found there to be 15 described European species plus cryptic species, a results more in line with Morgan’s (1984) recognition of multiple species than, for example, Kunz’s (1994) much more conservative treatment.
Acu	1851	valid	species	angustula Schenck, 1856	CHRYSIDOIDEA	Chrysididae	Chrysidinae	Chrysidini	Chrysis		angustula	Schenck, 1856		England, Scotland, Wales
Acu	1852	invalid	species	brevidens Tournier, 1879	CHRYSIDOIDEA	Chrysididae	Chrysidinae	Chrysidini	Chrysis		brevidens	Tournier, 1879
Acu	1853	valid	species	corusca Valkeila, 1971	CHRYSIDOIDEA	Chrysididae	Chrysidinae	Chrysidini	Chrysis		corusca	Valkeila, 1971	added by Soon et al. (2014)	England
Acu	1854	valid	species	fulgida Linnaeus, 1761	CHRYSIDOIDEA	Chrysididae	Chrysidinae	Chrysidini	Chrysis		fulgida	Linnaeus, 1761		England
Acu	1855	valid	species	gracillima (Förster, 1853, Chrysogona)	CHRYSIDOIDEA	Chrysididae	Chrysidinae	Chrysidini	Chrysis		gracillima	(Förster, 1853)	added by Morgan (1984)	England	Chrysogona
Acu	1856	invalid	species	saussurei Chevrier, 1862	CHRYSIDOIDEA	Chrysididae	Chrysidinae	Chrysidini	Chrysis		saussurei	Chevrier, 1862
Acu	1857	valid	species	ignita (Linnaeus, 1758, Sphex)	CHRYSIDOIDEA	Chrysididae	Chrysidinae	Chrysidini	Chrysis		ignita	(Linnaeus, 1758)		England, Scotland, Wales, Ireland, Isle of Man	Sphex
Acu	1858	valid	species	illigeri Wesmael, 1839	CHRYSIDOIDEA	Chrysididae	Chrysidinae	Chrysidini	Chrysis		illigeri	Wesmael, 1839		England
Acu	1859	invalid	species	chrysoprasina Hellén, 1919 preocc.	CHRYSIDOIDEA	Chrysididae	Chrysidinae	Chrysidini	Chrysis		chrysoprasina	Hellén, 1919 preocc.
Acu	1860	invalid	species	helleni Linsenmaier, 1959	CHRYSIDOIDEA	Chrysididae	Chrysidinae	Chrysidini	Chrysis		helleni	Linsenmaier, 1959
Acu	1861	invalid	species	succincta misident.	CHRYSIDOIDEA	Chrysididae	Chrysidinae	Chrysidini	Chrysis		succincta	misident.
Acu	1862	valid	species	impressa Schenck, 1856	CHRYSIDOIDEA	Chrysididae	Chrysidinae	Chrysidini	Chrysis		impressa	Schenck, 1856		England, Scotland, Wales, Ireland, Isle of Man
Acu	1863	valid	species	longula Abeille de Perrin, 1879	CHRYSIDOIDEA	Chrysididae	Chrysidinae	Chrysidini	Chrysis		longula	Abeille de Perrin, 1879		England, Scotland
Acu	1864	valid	species	mediata Linsenmaier, 1951	CHRYSIDOIDEA	Chrysididae	Chrysidinae	Chrysidini	Chrysis		mediata	Linsenmaier, 1951		England, Wales, Ireland
Acu	1865	valid	species	pseudobrevitarsis Linsenmaier, 1951	CHRYSIDOIDEA	Chrysididae	Chrysidinae	Chrysidini	Chrysis		pseudobrevitarsis	Linsenmaier, 1951		England
Acu	1866	valid	species	ruddii Shuckard, 1836	CHRYSIDOIDEA	Chrysididae	Chrysidinae	Chrysidini	Chrysis		ruddii	Shuckard, 1836		England, Scotland, Wales, Isle of Man
Acu	1867	invalid	species	auripes Wesmael, 1839	CHRYSIDOIDEA	Chrysididae	Chrysidinae	Chrysidini	Chrysis		auripes	Wesmael, 1839
Acu	1868	valid	species	schencki Linsenmaier, 1968	CHRYSIDOIDEA	Chrysididae	Chrysidinae	Chrysidini	Chrysis		schencki	Linsenmaier, 1968		England
Acu	1869	invalid	species	schenckiana Linsenmaier, 1959 preocc.	CHRYSIDOIDEA	Chrysididae	Chrysidinae	Chrysidini	Chrysis		schenckiana	Linsenmaier, 1959 preocc.
Acu	1870	valid	species	terminata Dahlbom, 1854	CHRYSIDOIDEA	Chrysididae	Chrysidinae	Chrysidini	Chrysis		terminata	Dahlbom, 1854	added by Soon et al. (2014)	England
Acu	1871	valid	species	vanlithi Linsenmaier, 1959	CHRYSIDOIDEA	Chrysididae	Chrysidinae	Chrysidini	Chrysis		vanlithi	Linsenmaier, 1959		England, Scotland, Wales, Ireland, Isle of Man
Acu	1872	invalid	species	rutiliventris misident.	CHRYSIDOIDEA	Chrysididae	Chrysidinae	Chrysidini	Chrysis		rutiliventris	misident.
Acu	1873	valid	species	viridula Linnaeus, 1761	CHRYSIDOIDEA	Chrysididae	Chrysidinae	Chrysidini	Chrysis		viridula	Linnaeus, 1761		England, Wales
Acu	1874	invalid	species	bidentata Linnaeus, 1767	CHRYSIDOIDEA	Chrysididae	Chrysidinae	Chrysidini	Chrysis		bidentata	Linnaeus, 1767
Acu	1876	valid	genus	CHRYSURA Dahlbom, 1845	CHRYSIDOIDEA	Chrysididae	Chrysidinae	Chrysidini	Chrysura			Dahlbom, 1845
Acu	1877	valid	species	hirsuta (Gerstäcker, 1869, Chrysis)	CHRYSIDOIDEA	Chrysididae	Chrysidinae	Chrysidini	Chrysura		hirsuta	(Gerstäcker, 1869)		Scotland	Chrysis
Acu	1878	invalid	species	osmiae (Thomson, 1870, Chrysis)	CHRYSIDOIDEA	Chrysididae	Chrysidinae	Chrysidini	Chrysura		osmiae	(Thomson, 1870, Chrysis)
Acu	1879	valid	species	radians (Harris, 1776, Chrysis)	CHRYSIDOIDEA	Chrysididae	Chrysidinae	Chrysidini	Chrysura		radians	(Harris, 1776)		England, Wales	Chrysis
Acu	1880	invalid	species	pustulosa (Abeille de Perrin, 1878, Chrysis)	CHRYSIDOIDEA	Chrysididae	Chrysidinae	Chrysidini	Chrysura		pustulosa	(Abeille de Perrin, 1878, Chrysis)
Acu	1882	valid	genus	PSEUDOSPINOLIA Linsenmaier, 1951	CHRYSIDOIDEA	Chrysididae	Chrysidinae	Chrysidini	Pseudospinolia			Linsenmaier, 1951
Acu	1883	valid	species	neglecta (Shuckard, 1836, Chrysis)	CHRYSIDOIDEA	Chrysididae	Chrysidinae	Chrysidini	Pseudospinolia		neglecta	(Shuckard, 1836)		England, Wales	Chrysis
Acu	1885	valid	genus	TRICHRYSIS Lichtenstein, 1876	CHRYSIDOIDEA	Chrysididae	Chrysidinae	Chrysidini	Trichrysis			Lichtenstein, 1876
Acu	1886	valid	species	cyanea (Linnaeus, 1758, Sphex)	CHRYSIDOIDEA	Chrysididae	Chrysidinae	Chrysidini	Trichrysis		cyanea	(Linnaeus, 1758)		England, Scotland, Wales	Sphex
Acu	1888	valid	tribe	ElampinI Dahlbom, 1854	CHRYSIDOIDEA	Chrysididae	Chrysidinae	Elampini				Dahlbom, 1854
Acu	1890	valid	genus	ELAMPUS Spinola, 1806	CHRYSIDOIDEA	Chrysididae	Chrysidinae	Elampini	Elampus			Spinola, 1806
Acu	1891	invalid	genus	NOTOZUS Förster, 1853	CHRYSIDOIDEA	Chrysididae	Chrysidinae	Elampini	NOTOZUS			Förster, 1853
Acu	1892	valid	species	panzeri (Fabricius, 1804, Chrysis)	CHRYSIDOIDEA	Chrysididae	Chrysidinae	Elampini	Elampus		panzeri	(Fabricius, 1804)		England	Chrysis
Acu	1893	invalid	species	scutellaris (Panzer, 1798, Chrysis) preocc.	CHRYSIDOIDEA	Chrysididae	Chrysidinae	Elampini	Elampus		scutellaris	(Panzer, 1798, Chrysis) preocc.
Acu	1894	invalid	species	constrictus misident.	CHRYSIDOIDEA	Chrysididae	Chrysidinae	Elampini	Elampus		constrictus	misident.
Acu	1896	valid	genus	HEDYCHRIDIUM Abeille de Perrin, 1878	CHRYSIDOIDEA	Chrysididae	Chrysidinae	Elampini	Hedychridium			Abeille de Perrin, 1878
Acu	1897	valid	species	ardens (Latreille, 1801, Chrysis)	CHRYSIDOIDEA	Chrysididae	Chrysidinae	Elampini	Hedychridium		ardens	(Latreille, 1801)		England, Scotland, Wales, Ireland, Isle of Man	Chrysis
Acu	1898	valid	species	coriaceum (Dahlbom, 1854, Hedychrum)	CHRYSIDOIDEA	Chrysididae	Chrysidinae	Elampini	Hedychridium		coriaceum	(Dahlbom, 1854)		England	Hedychrum
Acu	1899	valid	species	cupreum (Dahlbom, 1845, Hedychrum)	CHRYSIDOIDEA	Chrysididae	Chrysidinae	Elampini	Hedychridium		cupreum	(Dahlbom, 1845)		England, Wales	Hedychrum
Acu	1900	invalid	species	integrum (Dahlbom, 1854, Hedychrum)	CHRYSIDOIDEA	Chrysididae	Chrysidinae	Elampini	Hedychridium		integrum	(Dahlbom, 1854, Hedychrum)	Morgan (1984)
Acu	1901	valid	species	roseum (Rossi, 1790, Chrysis)	CHRYSIDOIDEA	Chrysididae	Chrysidinae	Elampini	Hedychridium		roseum	(Rossi, 1790)		England	Chrysis
Acu	1903	valid	genus	HEDYCHRUM Latreille, 1802	CHRYSIDOIDEA	Chrysididae	Chrysidinae	Elampini	Hedychrum			Latreille, 1802
Acu	1904	valid	species	niemelai Linsenmaier, 1959	CHRYSIDOIDEA	Chrysididae	Chrysidinae	Elampini	Hedychrum		niemelai	Linsenmaier, 1959		England
Acu	1905	invalid	species	nobile misident.	CHRYSIDOIDEA	Chrysididae	Chrysidinae	Elampini	Hedychrum		nobile	misident.
Acu	1906	valid	species	nobile (Scopoli, 1763, Sphex)	CHRYSIDOIDEA	Chrysididae	Chrysidinae	Elampini	Hedychrum		nobile	(Scopoli, 1763)	added by Baldock & Hawkins (2013)	England	Sphex
Acu	1907	invalid	species	lucidula (Fabricius, 1775, Chrysis)	CHRYSIDOIDEA	Chrysididae	Chrysidinae	Elampini	Hedychrum		lucidula	(Fabricius, 1775, Chrysis)
Acu	1908	invalid	species	regia (Fabricius, 1793, Chrysis)	CHRYSIDOIDEA	Chrysididae	Chrysidinae	Elampini	Hedychrum		regia	(Fabricius, 1793, Chrysis)
Acu	1909	valid	species	rutilans Dahlbom, 1854	CHRYSIDOIDEA	Chrysididae	Chrysidinae	Elampini	Hedychrum		rutilans	Dahlbom, 1854		England
Acu	1910	invalid	species	intermedium misident.	CHRYSIDOIDEA	Chrysididae	Chrysidinae	Elampini	Hedychrum		intermedium	misident.
Acu	1912	valid	genus	OMALUS Panzer, 1801	CHRYSIDOIDEA	Chrysididae	Chrysidinae	Elampini	Omalus			Panzer, 1801
Acu	1913	valid	species	aeneus (Fabricius, 1787, Chrysis)	CHRYSIDOIDEA	Chrysididae	Chrysidinae	Elampini	Omalus		aeneus	(Fabricius, 1787)		England, Wales	Chrysis
Acu	1914	valid	species	puncticollis (Mocsáry, 1887, Ellampus)	CHRYSIDOIDEA	Chrysididae	Chrysidinae	Elampini	Omalus		puncticollis	(Mocsáry, 1887)	Treated as a subspecies of aeneus in Fauna Europaea.	England, Scotland, Wales	Ellampus
Acu	1916	valid	genus	PHILOCTETES Abeille de Perrin, 1879	CHRYSIDOIDEA	Chrysididae	Chrysidinae	Elampini	Philoctetes			Abeille de Perrin, 1879
Acu	1917	valid	species	truncatus (Dahlbom, 1831, Chrysis)	CHRYSIDOIDEA	Chrysididae	Chrysidinae	Elampini	Philoctetes		truncatus	(Dahlbom, 1831)		England	Chrysis
Acu	1919	valid	genus	PSEUDOMALUS Ashmead, 1902	CHRYSIDOIDEA	Chrysididae	Chrysidinae	Elampini	Pseudomalus			Ashmead, 1902
Acu	1920	valid	species	auratus (Linnaeus, 1758, Sphex)	CHRYSIDOIDEA	Chrysididae	Chrysidinae	Elampini	Pseudomalus		auratus	(Linnaeus, 1758)		England, Scotland, Wales, Ireland	Sphex
Acu	1921	valid	species	violaceus (Scopoli, 1763, Sphex)	CHRYSIDOIDEA	Chrysididae	Chrysidinae	Elampini	Pseudomalus		violaceus	(Scopoli, 1763)		England, Wales	Sphex
Acu	1923	valid	Family	Dryinidae Haliday, 1833	CHRYSIDOIDEA	Dryinidae						Haliday, 1833	Some distributional data and synonymy from Olmi (1984), supplemented by Perkins (1976) and Olmi (1989).
Acu	1925	valid	Subfamily	Anteoninae Perkins, 1912	CHRYSIDOIDEA	Dryinidae	Anteoninae					Perkins, 1912
Acu	1927	valid	genus	ANTEON Jurine, 1807	CHRYSIDOIDEA	Dryinidae	Anteoninae		Anteon			Jurine, 1807
Acu	1928	invalid	genus	CHELOGYNUS Haliday, 1838	CHRYSIDOIDEA	Dryinidae	Anteoninae		CHELOGYNUS			Haliday, 1838
Acu	1929	invalid	genus	NEOCHELOGYNUS Perkins, 1905	CHRYSIDOIDEA	Dryinidae	Anteoninae		NEOCHELOGYNUS			Perkins, 1905
Acu	1930	valid	species	arcuatum Kieffer, 1905	CHRYSIDOIDEA	Dryinidae	Anteoninae		Anteon		arcuatum	Kieffer, 1905		England, Scotland, Wales, Ireland
Acu	1931	invalid	species	imberbis Kieffer, 1905	CHRYSIDOIDEA	Dryinidae	Anteoninae		Anteon		imberbis	Kieffer, 1905
Acu	1932	invalid	species	bensoni Richards, 1939	CHRYSIDOIDEA	Dryinidae	Anteoninae		Anteon		bensoni	Richards, 1939
Acu	1933	invalid	species	jurineanum in part, Perkins, 1976	CHRYSIDOIDEA	Dryinidae	Anteoninae		Anteon		jurineanum	in part, Perkins, 1976
Acu	1934	valid	species	brachycerum (Dalman, 1823, Dryinus)	CHRYSIDOIDEA	Dryinidae	Anteoninae		Anteon		brachycerum	(Dalman, 1823)		England, Scotland, Wales, Ireland	Dryinus
Acu	1935	invalid	species	lyde (Walker, 1837, Dryinus)	CHRYSIDOIDEA	Dryinidae	Anteoninae		Anteon		lyde	(Walker, 1837, Dryinus)
Acu	1936	invalid	species	nigricornis Kieffer, 1905	CHRYSIDOIDEA	Dryinidae	Anteoninae		Anteon		nigricornis	Kieffer, 1905
Acu	1937	invalid	species	triareolatus Kieffer, 1905	CHRYSIDOIDEA	Dryinidae	Anteoninae		Anteon		triareolatus	Kieffer, 1905
Acu	1938	invalid	species	brevicollis Kieffer, 1905	CHRYSIDOIDEA	Dryinidae	Anteoninae		Anteon		brevicollis	Kieffer, 1905
Acu	1939	invalid	species	flavitarsis Kieffer, 1905	CHRYSIDOIDEA	Dryinidae	Anteoninae		Anteon		flavitarsis	Kieffer, 1905
Acu	1940	invalid	species	indivisus Kieffer, 1905	CHRYSIDOIDEA	Dryinidae	Anteoninae		Anteon		indivisus	Kieffer, 1905
Acu	1941	invalid	species	nigroclavatus Kieffer, 1905	CHRYSIDOIDEA	Dryinidae	Anteoninae		Anteon		nigroclavatus	Kieffer, 1905
Acu	1942	invalid	species	curvatus Kieffer, 1906	CHRYSIDOIDEA	Dryinidae	Anteoninae		Anteon		curvatus	Kieffer, 1906
Acu	1943	invalid	species	obscuricornis Kieffer, 1906	CHRYSIDOIDEA	Dryinidae	Anteoninae		Anteon		obscuricornis	Kieffer, 1906
Acu	1944	invalid	species	suffolciensis (Chitty, 1908, Antaeon)	CHRYSIDOIDEA	Dryinidae	Anteoninae		Anteon		suffolciensis	(Chitty, 1908, Antaeon)
Acu	1945	invalid	species	curvus Kieffer, 1914	CHRYSIDOIDEA	Dryinidae	Anteoninae		Anteon		curvus	Kieffer, 1914
Acu	1946	valid	species	ephippiger (Dalman, 1818, Gonatopus)	CHRYSIDOIDEA	Dryinidae	Anteoninae		Anteon		ephippiger	(Dalman, 1818)		England, Scotland, Wales, Ireland	Gonatopus
Acu	1947	invalid	species	collaris (Dalman, 1818, Gonatopus)	CHRYSIDOIDEA	Dryinidae	Anteoninae		Anteon		collaris	(Dalman, 1818, Gonatopus)
Acu	1948	invalid	species	facialis (Thomson, 1860, Dryinus)	CHRYSIDOIDEA	Dryinidae	Anteoninae		Anteon		facialis	(Thomson, 1860, Dryinus)
Acu	1949	invalid	species	albidicollis Kieffer, 1905	CHRYSIDOIDEA	Dryinidae	Anteoninae		Anteon		albidicollis	Kieffer, 1905
Acu	1950	invalid	species	rubrifrons Kieffer, 1905	CHRYSIDOIDEA	Dryinidae	Anteoninae		Anteon		rubrifrons	Kieffer, 1905
Acu	1951	invalid	species	rufovariegatus (Berland, 1928, Chelogynus)	CHRYSIDOIDEA	Dryinidae	Anteoninae		Anteon		rufovariegatus	(Berland, 1928, Chelogynus)
Acu	1952	invalid	species	albidocolle Richards, 1939	CHRYSIDOIDEA	Dryinidae	Anteoninae		Anteon		albidocolle	Richards, 1939
Acu	1953	invalid	species	pyonganensis Moczar, 1983	CHRYSIDOIDEA	Dryinidae	Anteoninae		Anteon		pyonganensis	Moczar, 1983
Acu	1954	valid	species	exiguum (Haupt, 1941, Chelogynus)	CHRYSIDOIDEA	Dryinidae	Anteoninae		Anteon		exiguum	(Haupt, 1941)	added by Burn (1995)	England, Wales	Chelogynus
Acu	1955	invalid	species	subarcticus Hellén, 1935 nom. nud.	CHRYSIDOIDEA	Dryinidae	Anteoninae		Anteon		subarcticus	Hellén, 1935 nom. dub.
Acu	1956	invalid	species	flaviscapus Jansson, 1950	CHRYSIDOIDEA	Dryinidae	Anteoninae		Anteon		flaviscapus	Jansson, 1950
Acu	1957	invalid	species	subarcticus Hellén, 1953	CHRYSIDOIDEA	Dryinidae	Anteoninae		Anteon		subarcticus	Hellén, 1953
Acu	1958	valid	species	faciale (Thomson, 1860)	CHRYSIDOIDEA	Dryinidae	Anteoninae		Anteon		faciale	(Thomson, 1860)		England	MISSING FROM WORD
Acu	1959	invalid	species	pseudohilare Burn, 1990	CHRYSIDOIDEA	Dryinidae	Anteoninae		Anteon		pseudohilare	Burn, 1990
Acu	1960	valid	species	flavicorne (Dalman, 1818, Gonatopus)	CHRYSIDOIDEA	Dryinidae	Anteoninae		Anteon		flavicorne	(Dalman, 1818)		England, Scotland, Wales, Ireland	Gonatopus
Acu	1961	invalid	species	sericeus Kieffer, 1905	CHRYSIDOIDEA	Dryinidae	Anteoninae		Anteon		sericeus	Kieffer, 1905
Acu	1962	invalid	species	subflavicornis Haupt, 1941	CHRYSIDOIDEA	Dryinidae	Anteoninae		Anteon		subflavicornis	Haupt, 1941
Acu	1963	valid	species	fulviventre (Haliday, 1828, Dryinus)	CHRYSIDOIDEA	Dryinidae	Anteoninae		Anteon		fulviventre	(Haliday, 1828)		England, Scotland, Wales, Ireland, Isle of Man	Dryinus
Acu	1964	invalid	species	fuscipes (Thomson, 1860, Dryinus)	CHRYSIDOIDEA	Dryinidae	Anteoninae		Anteon		fuscipes	(Thomson, 1860, Dryinus)
Acu	1965	invalid	species	similis Kieffer, 1905	CHRYSIDOIDEA	Dryinidae	Anteoninae		Anteon		similis	Kieffer, 1905
Acu	1966	invalid	species	gracilicollis Kieffer, 1905	CHRYSIDOIDEA	Dryinidae	Anteoninae		Anteon		gracilicollis	Kieffer, 1905
Acu	1967	invalid	species	flavinervis Kieffer, 1905	CHRYSIDOIDEA	Dryinidae	Anteoninae		Anteon		flavinervis	Kieffer, 1905
Acu	1968	invalid	species	parvulus Kieffer, 1905	CHRYSIDOIDEA	Dryinidae	Anteoninae		Anteon		parvulus	Kieffer, 1905
Acu	1969	invalid	species	xanthostigma Kieffer, 1905	CHRYSIDOIDEA	Dryinidae	Anteoninae		Anteon		xanthostigma	Kieffer, 1905
Acu	1970	invalid	species	flaviscapus Kieffer, 1905	CHRYSIDOIDEA	Dryinidae	Anteoninae		Anteon		flaviscapus	Kieffer, 1905
Acu	1971	invalid	species	parvus Kieffer, 1906	CHRYSIDOIDEA	Dryinidae	Anteoninae		Anteon		parvus	Kieffer, 1906
Acu	1972	invalid	species	alutaceus (Richards, 1935, Chelogynus)	CHRYSIDOIDEA	Dryinidae	Anteoninae		Anteon		alutaceus	(Richards, 1935, Chelogynus)
Acu	1973	valid	species	gaullei Kieffer, 1905	CHRYSIDOIDEA	Dryinidae	Anteoninae		Anteon		gaullei	Kieffer, 1905		England, Scotland, Wales, Ireland
Acu	1974	invalid	species	cameroni Kieffer, 1905	CHRYSIDOIDEA	Dryinidae	Anteoninae		Anteon		cameroni	Kieffer, 1905
Acu	1975	invalid	species	trivialis Kieffer, 1905	CHRYSIDOIDEA	Dryinidae	Anteoninae		Anteon		trivialis	Kieffer, 1905
Acu	1976	invalid	species	rufulocollis (Chitty, 1908, Antaeon)	CHRYSIDOIDEA	Dryinidae	Anteoninae		Anteon		rufulocollis	(Chitty, 1908, Antaeon)
Acu	1977	valid	species	infectum (Haliday, 1837, Dryinus)	CHRYSIDOIDEA	Dryinidae	Anteoninae		Anteon		infectum	(Haliday, 1837)		England, Scotland, Ireland	Dryinus
Acu	1978	invalid	species	luteicornis misident.	CHRYSIDOIDEA	Dryinidae	Anteoninae		Anteon		luteicornis	misident.	Sensu Richards (1939) and Perkins (1976).
Acu	1979	invalid	species	inclytus (Haliday, 1837, Dryinus)	CHRYSIDOIDEA	Dryinidae	Anteoninae		Anteon		inclytus	(Haliday, 1837, Dryinus)
Acu	1980	invalid	species	lateralis (Thomson, 1860, Dryinus)	CHRYSIDOIDEA	Dryinidae	Anteoninae		Anteon		lateralis	(Thomson, 1860, Dryinus)
Acu	1981	invalid	species	fusiformis Kieffer, 1905	CHRYSIDOIDEA	Dryinidae	Anteoninae		Anteon		fusiformis	Kieffer, 1905
Acu	1982	invalid	species	punctatus Kieffer, 1905	CHRYSIDOIDEA	Dryinidae	Anteoninae		Anteon		punctatus	Kieffer, 1905
Acu	1983	invalid	species	ellimani (Chitty, 1908, Antaeon)	CHRYSIDOIDEA	Dryinidae	Anteoninae		Anteon		ellimani	(Chitty, 1908, Antaeon)
Acu	1984	valid	species	jurineanum Latreille, 1809	CHRYSIDOIDEA	Dryinidae	Anteoninae		Anteon		jurineanum	Latreille, 1809		England, Scotland, Wales, Ireland
Acu	1985	invalid	species	brevicornis (Dalman, 1818, Gonatopus)	CHRYSIDOIDEA	Dryinidae	Anteoninae		Anteon		brevicornis	(Dalman, 1818, Gonatopus)
Acu	1986	invalid	species	cursor (Haliday, 1828, Dryinus)	CHRYSIDOIDEA	Dryinidae	Anteoninae		Anteon		cursor	(Haliday, 1828, Dryinus)
Acu	1987	invalid	species	otiartes (Walker, 1837, Dryinus)	CHRYSIDOIDEA	Dryinidae	Anteoninae		Anteon		otiartes	(Walker, 1837, Dryinus)
Acu	1988	invalid	species	sisithrus (Walker, 1837, Dryinus)	CHRYSIDOIDEA	Dryinidae	Anteoninae		Anteon		sisithrus	(Walker, 1837, Dryinus)
Acu	1989	invalid	species	nanus (Haliday, 1837, Dryinus)	CHRYSIDOIDEA	Dryinidae	Anteoninae		Anteon		nanus	(Haliday, 1837, Dryinus)
Acu	1990	invalid	species	crenulatus Kieffer, 1905	CHRYSIDOIDEA	Dryinidae	Anteoninae		Anteon		crenulatus	Kieffer, 1905
Acu	1991	invalid	species	thomsoni Kieffer, 1905	CHRYSIDOIDEA	Dryinidae	Anteoninae		Anteon		thomsoni	Kieffer, 1905
Acu	1992	invalid	species	vicinus Kieffer, 1905	CHRYSIDOIDEA	Dryinidae	Anteoninae		Anteon		vicinus	Kieffer, 1905
Acu	1993	invalid	species	marginatus Kieffer, 1905	CHRYSIDOIDEA	Dryinidae	Anteoninae		Anteon		marginatus	Kieffer, 1905
Acu	1994	invalid	species	rectus Kieffer, 1905	CHRYSIDOIDEA	Dryinidae	Anteoninae		Anteon		rectus	Kieffer, 1905
Acu	1995	invalid	species	scoticus Kieffer, 1905	CHRYSIDOIDEA	Dryinidae	Anteoninae		Anteon		scoticus	Kieffer, 1905
Acu	1996	invalid	species	barbatus (Chitty, 1908, Antaeon)	CHRYSIDOIDEA	Dryinidae	Anteoninae		Anteon		barbatus	(Chitty, 1908, Antaeon)
Acu	1997	invalid	species	brunneipes (Berland, 1928, Xenanteon)	CHRYSIDOIDEA	Dryinidae	Anteoninae		Anteon		brunneipes	(Berland, 1928, Xenanteon)
Acu	1998	invalid	species	nec jurineanum Richards, 1939	CHRYSIDOIDEA	Dryinidae	Anteoninae		Anteon		nec jurineanum	Richards, 1939
Acu	1999	invalid	species	nec jurineanum Perkins, 1976	CHRYSIDOIDEA	Dryinidae	Anteoninae		Anteon		nec jurineanum	Perkins, 1976
Acu	2000	valid	species	pubicorne (Dalman, 1818, Gonatopus)	CHRYSIDOIDEA	Dryinidae	Anteoninae		Anteon		pubicorne	(Dalman, 1818)	Included as a synonym of brachycerum by Richards (1978).	England, Scotland, Wales, Ireland	Gonatopus
Acu	2001	invalid	species	tenuicornis (Dalman, 1823, Dryinus)	CHRYSIDOIDEA	Dryinidae	Anteoninae		Anteon		tenuicornis	(Dalman, 1823, Dryinus)
Acu	2002	invalid	species	cephalotes (Ljungh, 1824, Gonatopus)	CHRYSIDOIDEA	Dryinidae	Anteoninae		Anteon		cephalotes	(Ljungh, 1824, Gonatopus)
Acu	2003	invalid	species	lucidus (Haliday, 1828, Dryinus)	CHRYSIDOIDEA	Dryinidae	Anteoninae		Anteon		lucidus	(Haliday, 1828, Dryinus)
Acu	2004	invalid	species	penidas (Walker, 1837, Dryinus)	CHRYSIDOIDEA	Dryinidae	Anteoninae		Anteon		penidas	(Walker, 1837, Dryinus)
Acu	2005	invalid	species	alorus (Walker, 1837, Dryinus)	CHRYSIDOIDEA	Dryinidae	Anteoninae		Anteon		alorus	(Walker, 1837, Dryinus)
Acu	2006	invalid	species	fuscoclavatus Kieffer, 1905	CHRYSIDOIDEA	Dryinidae	Anteoninae		Anteon		fuscoclavatus	Kieffer, 1905
Acu	2007	invalid	species	triangularis Kieffer, 1905	CHRYSIDOIDEA	Dryinidae	Anteoninae		Anteon		triangularis	Kieffer, 1905
Acu	2008	invalid	species	divisus Kieffer, 1905	CHRYSIDOIDEA	Dryinidae	Anteoninae		Anteon		divisus	Kieffer, 1905
Acu	2009	invalid	species	vulgaris Kieffer, 1905	CHRYSIDOIDEA	Dryinidae	Anteoninae		Anteon		vulgaris	Kieffer, 1905
Acu	2010	invalid	species	breviventralis (Chitty, 1908, Antaeon)	CHRYSIDOIDEA	Dryinidae	Anteoninae		Anteon		breviventralis	(Chitty, 1908, Antaeon)
Acu	2011	invalid	species	delicatulus (Chitty, 1908, Antaeon)	CHRYSIDOIDEA	Dryinidae	Anteoninae		Anteon		delicatulus	(Chitty, 1908, Antaeon)
Acu	2012	invalid	species	serratus (Maneval, 1935, Chelogynus)	CHRYSIDOIDEA	Dryinidae	Anteoninae		Anteon		serratus	(Maneval, 1935, Chelogynus)
Acu	2013	invalid	species	exiguus (Haupt, 1941, Chelogynus)	CHRYSIDOIDEA	Dryinidae	Anteoninae		Anteon		exiguus	(Haupt, 1941, Chelogynus)
Acu	2014	invalid	species	mongolicum Moczar, 1983	CHRYSIDOIDEA	Dryinidae	Anteoninae		Anteon		mongolicum	Moczar, 1983
Acu	2015	valid	species	reticulatum Kieffer, 1905	CHRYSIDOIDEA	Dryinidae	Anteoninae		Anteon		reticulatum	Kieffer, 1905	added by Olmi (1989)	England
Acu	2016	valid	species	scapulare (Haliday, 1837, Dryinus)	CHRYSIDOIDEA	Dryinidae	Anteoninae		Anteon		scapulare	(Haliday, 1837)		England	Dryinus
Acu	2017	invalid	species	longiforceps Kieffer, 1905	CHRYSIDOIDEA	Dryinidae	Anteoninae		Anteon		longiforceps	Kieffer, 1905
Acu	2018	invalid	species	carinatus Kieffer, 1905	CHRYSIDOIDEA	Dryinidae	Anteoninae		Anteon		carinatus	Kieffer, 1905
Acu	2019	invalid	species	lanionis (Haupt, 1941, Chelogynus)	CHRYSIDOIDEA	Dryinidae	Anteoninae		Anteon		lanionis	(Haupt, 1941, Chelogynus)
Acu	2020	valid	species	tripartitum Kieffer, 1905	CHRYSIDOIDEA	Dryinidae	Anteoninae		Anteon		tripartitum	Kieffer, 1905		England, Scotland, Ireland
Acu	2021	invalid	species	tricarinatus Kieffer, 1905	CHRYSIDOIDEA	Dryinidae	Anteoninae		Anteon		tricarinatus	Kieffer, 1905
Acu	2022	invalid	species	kiefferi (Chitty, 1908, Antaeon)	CHRYSIDOIDEA	Dryinidae	Anteoninae		Anteon		kiefferi	(Chitty, 1908, Antaeon)
Acu	2023	invalid	species	angusticollis (Berland, 1928, Chelogynus)	CHRYSIDOIDEA	Dryinidae	Anteoninae		Anteon		angusticollis	(Berland, 1928, Chelogynus)
Acu	2024	invalid	species	prehensor (Maneval, 1935, Chelogynus)	CHRYSIDOIDEA	Dryinidae	Anteoninae		Anteon		prehensor	(Maneval, 1935, Chelogynus)
Acu	2025	invalid	species	berlandi (Richards, 1936, Chelogynus)	CHRYSIDOIDEA	Dryinidae	Anteoninae		Anteon		berlandi	(Richards, 1936, Chelogynus)
Acu	2026	invalid	species	silvaticus (Ponomarenko, 1970, Chelogynus)	CHRYSIDOIDEA	Dryinidae	Anteoninae		Anteon		silvaticus	(Ponomarenko, 1970, Chelogynus)
Acu	2028	valid	genus	LONCHODRYINUS Kieffer, 1905	CHRYSIDOIDEA	Dryinidae	Anteoninae		Lonchodryinus			Kieffer, 1905
Acu	2029	invalid	genus	PRENANTEON Kieffer, 1913	CHRYSIDOIDEA	Dryinidae	Anteoninae		PRENANTEON			Kieffer, 1913
Acu	2030	invalid	genus	PSILANTEON Kieffer, 1913	CHRYSIDOIDEA	Dryinidae	Anteoninae		PSILANTEON			Kieffer, 1913
Acu	2031	valid	species	ruficornis (Dalman, 1818, Gonatopus)	CHRYSIDOIDEA	Dryinidae	Anteoninae		Lonchodryinus		ruficornis	(Dalman, 1818)		England, Scotland, Wales, Ireland, Isle of Man	Gonatopus
Acu	2032	invalid	species	basalis (Dalman, 1818, Gonatopus)	CHRYSIDOIDEA	Dryinidae	Anteoninae		Lonchodryinus		basalis	(Dalman, 1818, Gonatopus)
Acu	2033	invalid	species	frontalis (Dalman, 1818, Gonatopus)	CHRYSIDOIDEA	Dryinidae	Anteoninae		Lonchodryinus		frontalis	(Dalman, 1818, Gonatopus)
Acu	2034	invalid	species	fuscicornis (Dalman, 1818, Gonatopus)	CHRYSIDOIDEA	Dryinidae	Anteoninae		Lonchodryinus		fuscicornis	(Dalman, 1818, Gonatopus)
Acu	2035	invalid	species	longicornis (Dalman, 1823, Dryinus)	CHRYSIDOIDEA	Dryinidae	Anteoninae		Lonchodryinus		longicornis	(Dalman, 1823, Dryinus)
Acu	2036	invalid	species	crassimanus (Haliday, 1828, Dryinus)	CHRYSIDOIDEA	Dryinidae	Anteoninae		Lonchodryinus		crassimanus	(Haliday, 1828, Dryinus)
Acu	2037	invalid	species	daos (Walker, 1837, Dryinus)	CHRYSIDOIDEA	Dryinidae	Anteoninae		Lonchodryinus		daos	(Walker, 1837, Dryinus)
Acu	2038	invalid	species	ilus (Walker, 1837, Dryinus)	CHRYSIDOIDEA	Dryinidae	Anteoninae		Lonchodryinus		ilus	(Walker, 1837, Dryinus)
Acu	2039	invalid	species	misor (Walker, 1837, Dryinus)	CHRYSIDOIDEA	Dryinidae	Anteoninae		Lonchodryinus		misor	(Walker, 1837, Dryinus)
Acu	2040	invalid	species	lapponicus (Thomson, 1860, Dryinus)	CHRYSIDOIDEA	Dryinidae	Anteoninae		Lonchodryinus		lapponicus	(Thomson, 1860, Dryinus)
Acu	2041	invalid	species	retusus (Thomson, 1860, Dryinus)	CHRYSIDOIDEA	Dryinidae	Anteoninae		Lonchodryinus		retusus	(Thomson, 1860, Dryinus)
Acu	2042	invalid	species	lepidus (Förster, 1861, Chelogynus)	CHRYSIDOIDEA	Dryinidae	Anteoninae		Lonchodryinus		lepidus	(Förster, 1861, Chelogynus)
Acu	2043	invalid	species	subapterus (Kieffer, 1905, Anteon)	CHRYSIDOIDEA	Dryinidae	Anteoninae		Lonchodryinus		subapterus	(Kieffer, 1905, Anteon)
Acu	2044	invalid	species	aequalis (Kieffer, 1905, Anteon)	CHRYSIDOIDEA	Dryinidae	Anteoninae		Lonchodryinus		aequalis	(Kieffer, 1905, Anteon)
Acu	2045	invalid	species	melanocera (Kieffer, 1905, Anteon)	CHRYSIDOIDEA	Dryinidae	Anteoninae		Lonchodryinus		melanocera	(Kieffer, 1905, Anteon)
Acu	2046	invalid	species	vitellinipes (Kieffer, 1905, Anteon)	CHRYSIDOIDEA	Dryinidae	Anteoninae		Lonchodryinus		vitellinipes	(Kieffer, 1905, Anteon)
Acu	2047	invalid	species	procericornis (Kieffer, 1905, Anteon)	CHRYSIDOIDEA	Dryinidae	Anteoninae		Lonchodryinus		procericornis	(Kieffer, 1905, Anteon)
Acu	2048	invalid	species	declivis (Kieffer, 1905, Anteon)	CHRYSIDOIDEA	Dryinidae	Anteoninae		Lonchodryinus		declivis	(Kieffer, 1905, Anteon)
Acu	2049	invalid	species	pallidinervis (Kieffer, 1905, Anteon)	CHRYSIDOIDEA	Dryinidae	Anteoninae		Lonchodryinus		pallidinervis	(Kieffer, 1905, Anteon)
Acu	2050	invalid	species	integer (Kieffer, 1905, Anteon)	CHRYSIDOIDEA	Dryinidae	Anteoninae		Lonchodryinus		integer	(Kieffer, 1905, Anteon)
Acu	2051	invalid	species	curvinervis (Kieffer, 1905, Anteon)	CHRYSIDOIDEA	Dryinidae	Anteoninae		Lonchodryinus		curvinervis	(Kieffer, 1905, Anteon)
Acu	2052	invalid	species	fractinervis (Kieffer, 1905, Anteon)	CHRYSIDOIDEA	Dryinidae	Anteoninae		Lonchodryinus		fractinervis	(Kieffer, 1905, Anteon)
Acu	2053	invalid	species	hyalinipennis (Kieffer, 1905, Anteon)	CHRYSIDOIDEA	Dryinidae	Anteoninae		Lonchodryinus		hyalinipennis	(Kieffer, 1905, Anteon)
Acu	2054	invalid	species	longifilis (Kieffer, 1906, Anteon)	CHRYSIDOIDEA	Dryinidae	Anteoninae		Lonchodryinus		longifilis	(Kieffer, 1906, Anteon)
Acu	2055	invalid	species	halidayi (Kieffer, 1906, Anteon)	CHRYSIDOIDEA	Dryinidae	Anteoninae		Lonchodryinus		halidayi	(Kieffer, 1906, Anteon)
Acu	2056	invalid	species	morleyi (Chitty, 1908, Antaeon)	CHRYSIDOIDEA	Dryinidae	Anteoninae		Lonchodryinus		morleyi	(Chitty, 1908, Antaeon)
Acu	2057	invalid	species	luffnessensis (Chitty, 1908, Antaeon)	CHRYSIDOIDEA	Dryinidae	Anteoninae		Lonchodryinus		luffnessensis	(Chitty, 1908, Antaeon)
Acu	2058	invalid	species	beaumonti (Chitty, 1908, Antaeon)	CHRYSIDOIDEA	Dryinidae	Anteoninae		Lonchodryinus		beaumonti	(Chitty, 1908, Antaeon)
Acu	2059	invalid	species	walkeri (Kieffer, 1914, Chelogynus)	CHRYSIDOIDEA	Dryinidae	Anteoninae		Lonchodryinus		walkeri	(Kieffer, 1914, Chelogynus)
Acu	2060	invalid	species	parcepunctatus (Kieffer, 1914, Prenanteon)	CHRYSIDOIDEA	Dryinidae	Anteoninae		Lonchodryinus		parcepunctatus	(Kieffer, 1914, Prenanteon)
Acu	2061	invalid	species	palustris (Oglobin, 1924, Prenanteon)	CHRYSIDOIDEA	Dryinidae	Anteoninae		Lonchodryinus		palustris	(Oglobin, 1924, Prenanteon)
Acu	2062	invalid	species	filicornis (Oglobin, 1924, Prenanteon)	CHRYSIDOIDEA	Dryinidae	Anteoninae		Lonchodryinus		filicornis	(Oglobin, 1924, Prenanteon)
Acu	2063	invalid	species	euscelisi (Haupt, 1941, Prenanteon)	CHRYSIDOIDEA	Dryinidae	Anteoninae		Lonchodryinus		euscelisi	(Haupt, 1941, Prenanteon)
Acu	2064	invalid	species	semenovi (Ponomarenko, 1970, Prenanteon)	CHRYSIDOIDEA	Dryinidae	Anteoninae		Lonchodryinus		semenovi	(Ponomarenko, 1970, Prenanteon)
Acu	2065	invalid	species	foveatus (Richards, 1971, Prenanteon)	CHRYSIDOIDEA	Dryinidae	Anteoninae		Lonchodryinus		foveatus	(Richards, 1971, Prenanteon)
Acu	2066	invalid	species	pektusanense (Moczar, 1983, Prenanteon)	CHRYSIDOIDEA	Dryinidae	Anteoninae		Lonchodryinus		pektusanense	(Moczar, 1983, Prenanteon)
Acu	2067	invalid	species	clavatum (Moczar, 1983, Prenanteon)	CHRYSIDOIDEA	Dryinidae	Anteoninae		Lonchodryinus		clavatum	(Moczar, 1983, Prenanteon)
Acu	2069	valid	Subfamily	Aphelopinae Perkins, 1912	CHRYSIDOIDEA	Dryinidae	Aphelopinae					Perkins, 1912
Acu	2071	valid	genus	APHELOPUS Dalman, 1823	CHRYSIDOIDEA	Dryinidae	Aphelopinae		Aphelopus			Dalman, 1823	Five species reared in Wales (Jervis, 1977).
Acu	2072	invalid	genus	ANTAPHELOPUS Benoit, 1951	CHRYSIDOIDEA	Dryinidae	Aphelopinae		ANTAPHELOPUS			Benoit, 1951
Acu	2073	invalid	genus	GYMNAPHELOPUS Benoit, 1951	CHRYSIDOIDEA	Dryinidae	Aphelopinae		GYMNAPHELOPUS			Benoit, 1951
Acu	2074	valid	species	atratus (Dalman, 1823, Dryinus)	CHRYSIDOIDEA	Dryinidae	Aphelopinae		Aphelopus		atratus	(Dalman, 1823)		England, Scotland, Wales, Ireland	Dryinus
Acu	2075	invalid	species	holomelas Richards, 1939	CHRYSIDOIDEA	Dryinidae	Aphelopinae		Aphelopus		holomelas	Richards, 1939
Acu	2076	valid	species	camus Richards, 1939	CHRYSIDOIDEA	Dryinidae	Aphelopinae		Aphelopus		camus	Richards, 1939		England, Wales
Acu	2077	invalid	species	heidelbergensis Richards, 1939	CHRYSIDOIDEA	Dryinidae	Aphelopinae		Aphelopus		heidelbergensis	Richards, 1939
Acu	2078	valid	species	melaleucus (Dalman, 1818, Gonatopus)	CHRYSIDOIDEA	Dryinidae	Aphelopinae		Aphelopus		melaleucus	(Dalman, 1818)		England, Scotland, Wales, Ireland	Gonatopus
Acu	2079	invalid	species	albipes (Ratzeburg, 1848, Ceraphron)	CHRYSIDOIDEA	Dryinidae	Aphelopinae		Aphelopus		albipes	(Ratzeburg, 1848, Ceraphron)
Acu	2080	valid	species	nigriceps Kieffer, 1905	CHRYSIDOIDEA	Dryinidae	Aphelopinae		Aphelopus		nigriceps	Kieffer, 1905		England, Scotland, Wales, Ireland
Acu	2081	valid	species	querceus Olmi, 1984	CHRYSIDOIDEA	Dryinidae	Aphelopinae		Aphelopus		querceus	Olmi, 1984	added by Burn (1995)	England
Acu	2082	valid	species	serratus Richards, 1939	CHRYSIDOIDEA	Dryinidae	Aphelopinae		Aphelopus		serratus	Richards, 1939		England, Scotland, Wales, Ireland
Acu	2084	valid	Subfamily	Bocchinae Richards, 1939	CHRYSIDOIDEA	Dryinidae	Bocchinae					Richards, 1939
Acu	2086	valid	genus	MYSTROPHORUS Förster, 1856	CHRYSIDOIDEA	Dryinidae	Bocchinae		Mystrophorus			Förster, 1856
Acu	2087	valid	species	formicaeformis Ruthe, 1859	CHRYSIDOIDEA	Dryinidae	Bocchinae		Mystrophorus		formicaeformis	Ruthe, 1859		England
Acu	2089	valid	Subfamily	Dryininae Kieffer, 1906	CHRYSIDOIDEA	Dryinidae	Dryininae					Kieffer, 1906
Acu	2091	valid	genus	DRYINUS Latreille, 1804	CHRYSIDOIDEA	Dryinidae	Dryininae		Dryinus			Latreille, 1804
Acu	2092	invalid	genus	CAMPYLONYX Westwood, 1835	CHRYSIDOIDEA	Dryinidae	Dryininae		CAMPYLONYX			Westwood, 1835
Acu	2093	invalid	genus	PARADRYINUS Perkins, 1905	CHRYSIDOIDEA	Dryinidae	Dryininae		PARADRYINUS			Perkins, 1905
Acu	2094	invalid	genus	CHLORODRYINUS Perkins, 1905	CHRYSIDOIDEA	Dryinidae	Dryininae		CHLORODRYINUS			Perkins, 1905
Acu	2095	invalid	genus	PLASTODRYINUS Kieffer, 1906	CHRYSIDOIDEA	Dryinidae	Dryininae		PLASTODRYINUS			Kieffer, 1906
Acu	2096	invalid	genus	MESODRYINUS Kieffer, 1906	CHRYSIDOIDEA	Dryinidae	Dryininae		MESODRYINUS			Kieffer, 1906
Acu	2097	invalid	genus	HESPERODRYINUS Perkins, 1907	CHRYSIDOIDEA	Dryinidae	Dryininae		HESPERODRYINUS			Perkins, 1907
Acu	2098	valid	species	collaris (Linnaeus, 1767, Sphex)	CHRYSIDOIDEA	Dryinidae	Dryininae		Dryinus		collaris	(Linnaeus, 1767)		England	Sphex
Acu	2099	invalid	species	formicarius Latreille, 1805	CHRYSIDOIDEA	Dryinidae	Dryininae		Dryinus		formicarius	Latreille, 1805
Acu	2100	invalid	species	ampuliciformis (Westwood, 1835, Campylonyx)	CHRYSIDOIDEA	Dryinidae	Dryininae		Dryinus		ampuliciformis	(Westwood, 1835, Campylonyx)
Acu	2101	invalid	species	corsicae (Kieffer, 1914, Lestodryinus)	CHRYSIDOIDEA	Dryinidae	Dryininae		Dryinus		corsicae	(Kieffer, 1914, Lestodryinus)
Acu	2102	valid	species	niger Kieffer, 1904	CHRYSIDOIDEA	Dryinidae	Dryininae		Dryinus		niger	Kieffer, 1904		England
Acu	2103	invalid	species	brittanicus (Richards, 1939, Mesodryinus)	CHRYSIDOIDEA	Dryinidae	Dryininae		Dryinus		brittanicus	(Richards, 1939, Mesodryinus)
Acu	2105	valid	Subfamily	Gonatopodinae Kieffer, 1906	CHRYSIDOIDEA	Dryinidae	Gonatopodinae					Kieffer, 1906
Acu	2107	valid	genus	GONATOPUS Ljungh, 1810	CHRYSIDOIDEA	Dryinidae	Gonatopodinae		Gonatopus			Ljungh, 1810
Acu	2108	invalid	genus	DICONDYLUS Haliday, 1829-30	CHRYSIDOIDEA	Dryinidae	Gonatopodinae		DICONDYLUS			Haliday, 1829-30
Acu	2109	invalid	genus	LABEO Haliday, 1833	CHRYSIDOIDEA	Dryinidae	Gonatopodinae		LABEO			Haliday, 1833
Acu	2110	invalid	genus	PSEUDOGONATOPUS Perkins, 1905	CHRYSIDOIDEA	Dryinidae	Gonatopodinae		PSEUDOGONATOPUS			Perkins, 1905
Acu	2111	invalid	genus	NEOGONATOPUS Perkins, 1905	CHRYSIDOIDEA	Dryinidae	Gonatopodinae		NEOGONATOPUS			Perkins, 1905
Acu	2112	invalid	genus	PACHYGONATOPUS Perkins, 1905	CHRYSIDOIDEA	Dryinidae	Gonatopodinae		PACHYGONATOPUS			Perkins, 1905
Acu	2113	invalid	genus	CHALCOGONATOPUS Perkins, 1905	CHRYSIDOIDEA	Dryinidae	Gonatopodinae		CHALCOGONATOPUS			Perkins, 1905
Acu	2114	invalid	genus	EUGONATOPUS Perkins, 1905	CHRYSIDOIDEA	Dryinidae	Gonatopodinae		EUGONATOPUS			Perkins, 1905
Acu	2115	invalid	genus	PLATYGONATOPUS Kieffer, 1906	CHRYSIDOIDEA	Dryinidae	Gonatopodinae		PLATYGONATOPUS			Kieffer, 1906
Acu	2116	invalid	genus	AGONATOPUS Perkins, 1907	CHRYSIDOIDEA	Dryinidae	Gonatopodinae		AGONATOPUS			Perkins, 1907
Acu	2117	invalid	genus	AGONATOPOIDES Perkins, 1907	CHRYSIDOIDEA	Dryinidae	Gonatopodinae		AGONATOPOIDES			Perkins, 1907
Acu	2118	invalid	genus	EUCAMPTONYX Perkins, 1907	CHRYSIDOIDEA	Dryinidae	Gonatopodinae		EUCAMPTONYX			Perkins, 1907
Acu	2119	invalid	genus	CYRTOGONATOPUS Kieffer, 1907	CHRYSIDOIDEA	Dryinidae	Gonatopodinae		CYRTOGONATOPUS			Kieffer, 1907
Acu	2120	invalid	genus	DIGONATOPUS Kieffer, 1913	CHRYSIDOIDEA	Dryinidae	Gonatopodinae		DIGONATOPUS			Kieffer, 1913
Acu	2121	invalid	genus	LABERIUS Kieffer, 1914	CHRYSIDOIDEA	Dryinidae	Gonatopodinae		LABERIUS			Kieffer, 1914
Acu	2122	invalid	genus	TRICHOGONATOPUS Hellén, 1930	CHRYSIDOIDEA	Dryinidae	Gonatopodinae		TRICHOGONATOPUS			Hellén, 1930
Acu	2123	invalid	genus	METAGONATOPUS Oglobin, 1932	CHRYSIDOIDEA	Dryinidae	Gonatopodinae		METAGONATOPUS			Oglobin, 1932
Acu	2124	invalid	genus	ALLOGONATOPUS Haupt, 1938	CHRYSIDOIDEA	Dryinidae	Gonatopodinae		ALLOGONATOPUS			Haupt, 1938
Acu	2125	invalid	genus	DONISTHORPINA Richards, 1939	CHRYSIDOIDEA	Dryinidae	Gonatopodinae		DONISTHORPINA			Richards, 1939
Acu	2126	invalid	genus	PLECTROGONATOPUS Richards, 1939	CHRYSIDOIDEA	Dryinidae	Gonatopodinae		PLECTROGONATOPUS			Richards, 1939
Acu	2127	invalid	genus	TETRODONTOCHELYS Richards, 1939	CHRYSIDOIDEA	Dryinidae	Gonatopodinae		TETRODONTOCHELYS			Richards, 1939
Acu	2128	invalid	genus	EPIGONATOPOIDES Richards, 1939	CHRYSIDOIDEA	Dryinidae	Gonatopodinae		EPIGONATOPOIDES			Richards, 1939
Acu	2129	invalid	genus	RHYNCHOGONATOPUS Benoit, 1953	CHRYSIDOIDEA	Dryinidae	Gonatopodinae		RHYNCHOGONATOPUS			Benoit, 1953
Acu	2130	invalid	genus	MADECAGONATOPUS Benoit, 1953	CHRYSIDOIDEA	Dryinidae	Gonatopodinae		MADECAGONATOPUS			Benoit, 1953
Acu	2131	invalid	genus	CYRTOGONATOPOIDES Ponomarenko, 1966	CHRYSIDOIDEA	Dryinidae	Gonatopodinae		CYRTOGONATOPOIDES			Ponomarenko, 1966
Acu	2132	invalid	genus	MEGAGONATOPUS Olmi & Currado, 1976	CHRYSIDOIDEA	Dryinidae	Gonatopodinae		MEGAGONATOPUS			Olmi & Currado, 1976
Acu	2133	invalid	genus	TETRADONTOCHELYS Perkins, 1976	CHRYSIDOIDEA	Dryinidae	Gonatopodinae		TETRADONTOCHELYS			Perkins, 1976
Acu	2134	valid	species	albosignatus Kieffer, 1905	CHRYSIDOIDEA	Dryinidae	Gonatopodinae		Gonatopus		albosignatus	Kieffer, 1905		England, Wales
Acu	2135	invalid	species	separatus (Richards, 1939, Pseudogonatopus)	CHRYSIDOIDEA	Dryinidae	Gonatopodinae		Gonatopus		separatus	(Richards, 1939, Pseudogonatopus)
Acu	2136	invalid			CHRYSIDOIDEA	Dryinidae	Gonatopodinae		Gonatopus				Burn & Olmi (2011)
Acu	2137	valid	genus	bicolor (Haliday, 1828, Dryinus)	CHRYSIDOIDEA	Dryinidae	Gonatopodinae		Bicolor			(Haliday, 1828)		England, Scotland, Wales, Ireland	Dryinus
Acu	2138	invalid	species	vitripennis (Haliday, 1833, Labeo)	CHRYSIDOIDEA	Dryinidae	Gonatopodinae		Bicolor		vitripennis	(Haliday, 1833, Labeo)
Acu	2139	invalid	species	excisus (Westwood, 1833, Antaeon)	CHRYSIDOIDEA	Dryinidae	Gonatopodinae		Bicolor		excisus	(Westwood, 1833, Antaeon)
Acu	2140	invalid	species	conjunctus Kieffer, 1905	CHRYSIDOIDEA	Dryinidae	Gonatopodinae		Bicolor		conjunctus	Kieffer, 1905
Acu	2141	invalid	species	bifarius Kieffer, 1906	CHRYSIDOIDEA	Dryinidae	Gonatopodinae		Bicolor		bifarius	Kieffer, 1906
Acu	2142	invalid	species	decretorius Haupt, 1916	CHRYSIDOIDEA	Dryinidae	Gonatopodinae		Bicolor		decretorius	Haupt, 1916
Acu	2143	invalid	species	lindbergi (Heikinheimo, 1957, Dicondylus)	CHRYSIDOIDEA	Dryinidae	Gonatopodinae		Bicolor		lindbergi	(Heikinheimo, 1957, Dicondylus)
Acu	2144	valid	species	clavipes (Thunberg, 1827, Gelis)	CHRYSIDOIDEA	Dryinidae	Gonatopodinae		Bicolor		clavipes	(Thunberg, 1827)		England, Scotland, Wales, Ireland	Gelis
Acu	2145	invalid	species	sepsoides Westwood, 1833	CHRYSIDOIDEA	Dryinidae	Gonatopodinae		Bicolor		sepsoides	Westwood, 1833
Acu	2146	invalid	species	pilosus Thomson, 1860	CHRYSIDOIDEA	Dryinidae	Gonatopodinae		Bicolor		pilosus	Thomson, 1860
Acu	2147	invalid	species	nigerrimus (Förster, 1861, Labeo)	CHRYSIDOIDEA	Dryinidae	Gonatopodinae		Bicolor		nigerrimus	(Förster, 1861, Labeo)
Acu	2148	invalid	species	pusillus Szépligeti, 1901, Labeo)	CHRYSIDOIDEA	Dryinidae	Gonatopodinae		Bicolor		pusillus	Szépligeti, 1901, Labeo)
Acu	2149	invalid	species	hispanicus Kieffer, 1905	CHRYSIDOIDEA	Dryinidae	Gonatopodinae		Bicolor		hispanicus	Kieffer, 1905
Acu	2150	invalid	species	sociabilis Kieffer, 1907	CHRYSIDOIDEA	Dryinidae	Gonatopodinae		Bicolor		sociabilis	Kieffer, 1907
Acu	2151	invalid	species	borealis Sahlberg, 1910	CHRYSIDOIDEA	Dryinidae	Gonatopodinae		Bicolor		borealis	Sahlberg, 1910
Acu	2152	invalid	species	wagneri Strand, 1919	CHRYSIDOIDEA	Dryinidae	Gonatopodinae		Bicolor		wagneri	Strand, 1919
Acu	2153	invalid	species	barbatellus Richards, 1939	CHRYSIDOIDEA	Dryinidae	Gonatopodinae		Bicolor		barbatellus	Richards, 1939
Acu	2154	invalid	species	campestris Ponomarenko, 1965	CHRYSIDOIDEA	Dryinidae	Gonatopodinae		Bicolor		campestris	Ponomarenko, 1965
Acu	2155	invalid	species	rhaensis Ponomarenko, 1970	CHRYSIDOIDEA	Dryinidae	Gonatopodinae		Bicolor		rhaensis	Ponomarenko, 1970
Acu	2156	valid	species	distinctus Kieffer, 1905	CHRYSIDOIDEA	Dryinidae	Gonatopodinae		Bicolor		distinctus	Kieffer, 1905		England, Wales
Acu	2157	invalid	species	septemdentatus Sahlberg, 1910	CHRYSIDOIDEA	Dryinidae	Gonatopodinae		Bicolor		septemdentatus	Sahlberg, 1910
Acu	2158	invalid	species	robustus (Ceballos, 1927, Dicondylus)	CHRYSIDOIDEA	Dryinidae	Gonatopodinae		Bicolor		robustus	(Ceballos, 1927, Dicondylus)
Acu	2159	valid	species	distinguendus Kieffer, 1905	CHRYSIDOIDEA	Dryinidae	Gonatopodinae		Bicolor		distinguendus	Kieffer, 1905		England, Wales, Ireland
Acu	2160	invalid	species	flavicornis Thomson, 1860 preocc.	CHRYSIDOIDEA	Dryinidae	Gonatopodinae		Bicolor		flavicornis	Thomson, 1860 preocc.
Acu	2161	invalid	species	luteicornis Kieffer, 1905	CHRYSIDOIDEA	Dryinidae	Gonatopodinae		Bicolor		luteicornis	Kieffer, 1905
Acu	2162	invalid	species	excavatus Sahlberg, 1910	CHRYSIDOIDEA	Dryinidae	Gonatopodinae		Bicolor		excavatus	Sahlberg, 1910
Acu	2163	invalid	species	liechtensteini Picard, 1932	CHRYSIDOIDEA	Dryinidae	Gonatopodinae		Bicolor		liechtensteini	Picard, 1932
Acu	2164	invalid	species	procerus (Haupt, 1938, Allogonatopus)	CHRYSIDOIDEA	Dryinidae	Gonatopodinae		Bicolor		procerus	(Haupt, 1938, Allogonatopus)
Acu	2165	invalid	species	thomsoni Hellén, 1953	CHRYSIDOIDEA	Dryinidae	Gonatopodinae		Bicolor		thomsoni	Hellén, 1953
Acu	2166	invalid	species	rossicus Ponomarenko, 1965	CHRYSIDOIDEA	Dryinidae	Gonatopodinae		Bicolor		rossicus	Ponomarenko, 1965
Acu	2167	valid	species	formicicolus (Richards, 1939)	CHRYSIDOIDEA	Dryinidae	Gonatopodinae		Bicolor		formicicolus	(Richards, 1939)		England, Wales	MISSING FROM WORD
Acu	2168	valid	species	helleni Raatikainen, 1961	CHRYSIDOIDEA	Dryinidae	Gonatopodinae		Bicolor		helleni	Raatikainen, 1961	added by Burn (1997)	England
Acu	2169	invalid	species	dichromus Kieffer, 1906	CHRYSIDOIDEA	Dryinidae	Gonatopodinae		Bicolor		dichromus	Kieffer, 1906
Acu	2170	invalid	species	rufescens Hellén, 1935	CHRYSIDOIDEA	Dryinidae	Gonatopodinae		Bicolor		rufescens	Hellén, 1935
Acu	2171	valid	species	lunatus Klug, 1810	CHRYSIDOIDEA	Dryinidae	Gonatopodinae		Bicolor		lunatus	Klug, 1810		England, Wales
Acu	2172	invalid	species	bifasciatus Kieffer, 1904	CHRYSIDOIDEA	Dryinidae	Gonatopodinae		Bicolor		bifasciatus	Kieffer, 1904
Acu	2173	invalid	species	gracilicornis Kieffer, 1904	CHRYSIDOIDEA	Dryinidae	Gonatopodinae		Bicolor		gracilicornis	Kieffer, 1904
Acu	2174	invalid	species	filicornis Kieffer, 1905	CHRYSIDOIDEA	Dryinidae	Gonatopodinae		Bicolor		filicornis	Kieffer, 1905
Acu	2175	invalid	species	gracilis Kieffer, 1905	CHRYSIDOIDEA	Dryinidae	Gonatopodinae		Bicolor		gracilis	Kieffer, 1905
Acu	2176	invalid	species	marshalli Kieffer, 1905	CHRYSIDOIDEA	Dryinidae	Gonatopodinae		Bicolor		marshalli	Kieffer, 1905
Acu	2177	invalid	species	myrmecophilus Kieffer, 1905	CHRYSIDOIDEA	Dryinidae	Gonatopodinae		Bicolor		myrmecophilus	Kieffer, 1905
Acu	2178	invalid	species	gracilipes Kieffer, 1906	CHRYSIDOIDEA	Dryinidae	Gonatopodinae		Bicolor		gracilipes	Kieffer, 1906
Acu	2179	invalid	species	raptoripes Strand, 1919	CHRYSIDOIDEA	Dryinidae	Gonatopodinae		Bicolor		raptoripes	Strand, 1919
Acu	2180	valid	species	pedestris Dalman, 1818	CHRYSIDOIDEA	Dryinidae	Gonatopodinae		Bicolor		pedestris	Dalman, 1818		England
Acu	2181	invalid	species	ljunghii Westwood, 1833	CHRYSIDOIDEA	Dryinidae	Gonatopodinae		Bicolor		ljunghii	Westwood, 1833
Acu	2182	invalid	species	leucostomus Sahlberg, 1910	CHRYSIDOIDEA	Dryinidae	Gonatopodinae		Bicolor		leucostomus	Sahlberg, 1910
Acu	2183	invalid	species	arnoldii (Ponomarenko, 1966, Pachygonatopus)	CHRYSIDOIDEA	Dryinidae	Gonatopodinae		Bicolor		arnoldii	(Ponomarenko, 1966, Pachygonatopus)
Acu	2184	valid	species	striatus Kieffer, 1905	CHRYSIDOIDEA	Dryinidae	Gonatopodinae		Bicolor		striatus	Kieffer, 1905		England, Scotland, Wales, Ireland
Acu	2185	invalid	species	richardsi (Moczar, 1965, Plectrogonatopus)	CHRYSIDOIDEA	Dryinidae	Gonatopodinae		Bicolor		richardsi	(Moczar, 1965, Plectrogonatopus)
Acu	2186	invalid	species	tauricus (Ponomarenko, 1965, Agonatopoides)	CHRYSIDOIDEA	Dryinidae	Gonatopodinae		Bicolor		tauricus	(Ponomarenko, 1965, Agonatopoides)
Acu	2188	valid	genus	HAPLOGONATOPUS Perkins, 1905	CHRYSIDOIDEA	Dryinidae	Gonatopodinae		Haplogonatopus			Perkins, 1905
Acu	2189	invalid	genus	MONOGONATOPUS Richards, 1939	CHRYSIDOIDEA	Dryinidae	Gonatopodinae		MONOGONATOPUS			Richards, 1939
Acu	2190	valid	species	oratorius (Westwood, 1833)	CHRYSIDOIDEA	Dryinidae	Gonatopodinae		Haplogonatopus		oratorius	(Westwood, 1833)		England	MISSING FROM WORD
Acu	2192	valid	Family	Embolemidae Förster, 1856	CHRYSIDOIDEA	Embolemidae						Förster, 1856
Acu	2194	valid	genus	EMBOLEMUS Westwood, 1833	CHRYSIDOIDEA	Embolemidae			Embolemus			Westwood, 1833
Acu	2195	invalid	genus	MYRMECOMORPHUS Westwood, 1833	CHRYSIDOIDEA	Embolemidae			MYRMECOMORPHUS			Westwood, 1833
Acu	2196	invalid	genus	POLYPLANUS Nees, 1834	CHRYSIDOIDEA	Embolemidae			POLYPLANUS			Nees, 1834
Acu	2197	invalid	genus	EMBOLIMUS Agassiz, 1846	CHRYSIDOIDEA	Embolemidae			EMBOLIMUS			Agassiz, 1846
Acu	2198	invalid	genus	FORMILA De Romand, 1846	CHRYSIDOIDEA	Embolemidae			FORMILA			De Romand, 1846
Acu	2199	invalid	genus	PEDINOMMA Förster, 1856	CHRYSIDOIDEA	Embolemidae			PEDINOMMA			Förster, 1856
Acu	2200	invalid	genus	AMPULICOMORPHA Ashmead, 1893	CHRYSIDOIDEA	Embolemidae			AMPULICOMORPHA			Ashmead, 1893
Acu	2201	invalid	genus	AMPULICIMORPHA Brues, 1933	CHRYSIDOIDEA	Embolemidae			AMPULICIMORPHA			Brues, 1933
Acu	2202	valid	species	ruddii (Westwood, 1833, Myrmecomorphus)	CHRYSIDOIDEA	Embolemidae			Embolemus		ruddii	(Westwood, 1833)		England, Scotland, Wales	Myrmecomorphus
Acu	2203	invalid	species	rufescens (Westwood, 1833, Myrmecomorphus)	CHRYSIDOIDEA	Embolemidae			Embolemus		rufescens	(Westwood, 1833, Myrmecomorphus)
Acu	2204	invalid	species	sickershusanus (Nees, 1834, Polyplanus)	CHRYSIDOIDEA	Embolemidae			Embolemus		sickershusanus	(Nees, 1834, Polyplanus)
Acu	2205	invalid	species	antennalis (Kieffer, 1906, Pedinomma)	CHRYSIDOIDEA	Embolemidae			Embolemus		antennalis	(Kieffer, 1906, Pedinomma)	Hilpert (1989)
Acu	2206	invalid	species	holochlora (Kieffer, 1906, Pedinomma)	CHRYSIDOIDEA	Embolemidae			Embolemus		holochlora	(Kieffer, 1906, Pedinomma)
Acu	2207	invalid	species	hypochlora (Kieffer, 1906, Pedinomma)	CHRYSIDOIDEA	Embolemidae			Embolemus		hypochlora	(Kieffer, 1906, Pedinomma)
Acu	2208	invalid	genus	rufus Kieffer, 1906	CHRYSIDOIDEA	Embolemidae			RUFUS			Kieffer, 1906
Acu	2210	valid	Superfamily	VESPOIDEA	VESPOIDEA								Some distribution data for Mutillidae, Sapygidae, Tiphiidae and Vespidae from Archer (2014).
Acu	2212	valid	Family	Formicidae Latreille, 1809	VESPOIDEA	Formicidae						Latreille, 1809	Nomenclature, synonymy and higher classification based on Bolton (1995, 2003), with additional references given.
Acu	2214	valid	Subfamily	Dolichoderinae Forel, 1878	VESPOIDEA	Formicidae	Dolichoderinae					Forel, 1878
Acu	2216	invalid	genus	[LINEPITHEMA Mayr, 1866	VESPOIDEA	Formicidae	Dolichoderinae		[LINEPITHEMA			Mayr, 1866]	Species of <i>Linepithema</i> removed from the British and Irish list: # <i>humile</i> (Mayr, 1868) . Although this highly invasive species has the potential to establish itself in hothouses, given the correct climate, I am unaware of any established colonies being found in Britain. Any introductions have been of isolated workers.
Acu	2219	valid	genus	TAPINOMA Förster, 1850	VESPOIDEA	Formicidae	Dolichoderinae		Tapinoma			Förster, 1850
Acu	2220	invalid	genus	MICROMYRMA Dufour, 1857	VESPOIDEA	Formicidae	Dolichoderinae		MICROMYRMA			Dufour, 1857
Acu	2221	invalid	genus	SEMONIUS Forel, 1910	VESPOIDEA	Formicidae	Dolichoderinae		SEMONIUS			Forel, 1910
Acu	2222	invalid	genus	TAPINOPTERA Santschi, 1925	VESPOIDEA	Formicidae	Dolichoderinae		TAPINOPTERA			Santschi, 1925
Acu	2223	invalid	genus	ZATAPINOMA Wheeler, 1928	VESPOIDEA	Formicidae	Dolichoderinae		ZATAPINOMA			Wheeler, 1928
Acu	2224	invalid	genus	NEOCLYSTOPSENELLA Kurian, 1955	VESPOIDEA	Formicidae	Dolichoderinae		NEOCLYSTOPSENELLA			Kurian, 1955
Acu	2225	valid	species	erraticum (Latreille, 1798, Formica)	VESPOIDEA	Formicidae	Dolichoderinae		Tapinoma		erraticum	(Latreille, 1798)		England	Formica
Acu	2226	invalid	species	caerulescens (Losana, 1834, Formica)	VESPOIDEA	Formicidae	Dolichoderinae		Tapinoma		caerulescens	(Losana, 1834, Formica)
Acu	2227	invalid	species	glabrella (Nylander, 1849, Formica)	VESPOIDEA	Formicidae	Dolichoderinae		Tapinoma		glabrella	(Nylander, 1849, Formica)
Acu	2228	invalid	species	collina Förster, 1850	VESPOIDEA	Formicidae	Dolichoderinae		Tapinoma		collina	Förster, 1850
Acu	2229	invalid	species	bononiensis Emery, 1925	VESPOIDEA	Formicidae	Dolichoderinae		Tapinoma		bononiensis	Emery, 1925
Acu	2230	invalid	species	breve Emery, 1925	VESPOIDEA	Formicidae	Dolichoderinae		Tapinoma		breve	Emery, 1925
Acu	2231	invalid	species	tauridis Emery, 1925	VESPOIDEA	Formicidae	Dolichoderinae		Tapinoma		tauridis	Emery, 1925
Acu	2232	invalid	species	transcaucasica Karavaiev, 1927	VESPOIDEA	Formicidae	Dolichoderinae		Tapinoma		transcaucasica	Karavaiev, 1927
Acu	2233	valid	species	subboreale Seifert, 2012	VESPOIDEA	Formicidae	Dolichoderinae		Tapinoma		subboreale	Seifert, 2012		England
Acu	2234	invalid	species	ambiguum misident.	VESPOIDEA	Formicidae	Dolichoderinae		Tapinoma		ambiguum	misident.	Seifert (2012) clarified the identity of the north European Tapinoma.
Acu	2235	invalid	species	madeirense misident.	VESPOIDEA	Formicidae	Dolichoderinae		Tapinoma		madeirense	misident.
Acu	2236	invalid	species	# melanocephalum (Fabricius, 1793, Formica)	VESPOIDEA	Formicidae	Dolichoderinae		Tapinoma		# melanocephalum	(Fabricius, 1793, Formica)
Acu	2237	invalid	species	nana (Jerdon, 1851, Formica) preocc.	VESPOIDEA	Formicidae	Dolichoderinae		Tapinoma		nana	(Jerdon, 1851, Formica) preocc.
Acu	2238	invalid	species	pellucida (Smith, 1857, Myrmica)	VESPOIDEA	Formicidae	Dolichoderinae		Tapinoma		pellucida	(Smith, 1857, Myrmica)
Acu	2239	invalid	species	familiaris (Smith, 1860, Formica) preocc.	VESPOIDEA	Formicidae	Dolichoderinae		Tapinoma		familiaris	(Smith, 1860, Formica) preocc.
[truncated: 942 more rows]

## Sheet: original names
group	ori seq	ID	author	date	original species	current authorship	original genus	original species	original combination	original authorship
Acu	1008	Acu1008	Kirby	1802	minutula	(Kirby, 1802)	Melitta	minutula	Melitta minutula	Kirby, 1802
Acu	1013	Acu1013	Kirby	1802	nana	(Kirby, 1802)	Melitta	nana	Melitta nana	Kirby, 1802
Acu	1023	Acu1023	Kirby	1802	chrysosceles	(Kirby, 1802)	Melitta	chrysosceles	Melitta chrysosceles	Kirby, 1802
Acu	1029	Acu1029	Kirby	1802	coitana	(Kirby, 1802)	Melitta	coitana	Melitta coitana	Kirby, 1802
Acu	1037	Acu1037	Kirby	1802	bimaculata	(Kirby, 1802)	Melitta	bimaculata	Melitta bimaculata	Kirby, 1802
Acu	1047	Acu1047	Kirby	1802	tibialis	(Kirby, 1802)	Melitta	tibialis	Melitta tibialis	Kirby, 1802
Acu	1061	Acu1061	Kirby	1802	proxima	(Kirby, 1802)	Melitta	proxima	Melitta proxima	Kirby, 1802
Acu	1066	Acu1066	Kirby	1802	angustior	(Kirby, 1802)	Melitta	angustior	Melitta angustior	Kirby, 1802
Acu	1074	Acu1074	Kirby	1802	dorsata	(Kirby, 1802)	Melitta	dorsata	Melitta dorsata	Kirby, 1802
Acu	1083	Acu1083	Kirby	1802	ovatula	(Kirby, 1802)	Melitta	ovatula	Melitta ovatula	Kirby, 1802
Acu	1091	Acu1091	Kirby	1802	wilkella	(Kirby, 1802)	Melitta	wilkella	Melitta wilkella	Kirby, 1802
Acu	1101	Acu1101	Fabricius	1781	haemorrhoa	(Fabricius, 1781)	Apis	haemorrhoa	Apis haemorrhoa	Fabricius, 1781
Acu	1118	Acu1118	Kirby	1802	banksianus	(Kirby, 1802)	Apis	banksianus	Apis banksianus	Kirby, 1802
Acu	1120	Acu1120	Scopoli	1763	calcaratus	(Scopoli, 1763)	Apis	calcaratus	Apis calcaratus	Scopoli, 1763
Acu	1131	Acu1131	Pallas	1772	plumipes	(Pallas, 1772)	Apis	plumipes	Apis plumipes	Pallas, 1772
Acu	1136	Acu1136	Panzer	1798	furcata	(Panzer, 1798)	Apis	furcata	Apis furcata	Panzer, 1798
Acu	1139	Acu1139	Panzer	1798	quadrimaculata	(Panzer, 1798)	Apis	quadrimaculata	Apis quadrimaculata	Panzer, 1798
Acu	1144	Acu1144	Panzer	1798	bimaculata	(Panzer, 1798)	Apis	bimaculata	Apis bimaculata	Panzer, 1798
Acu	1147	Acu1147	Linnaeus	1758	retusa	(Linnaeus, 1758)	Apis	retusa	Apis retusa	Linnaeus, 1758
Acu	116	Acu116	Linnaeus	1758	cribrarius	(Linnaeus, 1758)	Vespa	cribrarius	Vespa cribrarius	Linnaeus, 1758
Acu	1162	Acu1162	Fabricius	1775	cryptarum	(Fabricius, 1775)	Apis	cryptarum	Apis cryptarum	Fabricius, 1775
Acu	1163	Acu1163	Linnaeus	1761	lucorum	(Linnaeus, 1761)	Apis	lucorum	Apis lucorum	Linnaeus, 1761
Acu	1165	Acu1165	Linnaeus	1758	terrestris	(Linnaeus, 1758)	Apis	terrestris	Apis terrestris	Linnaeus, 1758
Acu	1169	Acu1169	Kirby	1802	cullumanus	(Kirby, 1802)	Apis	cullumanus	Apis cullumanus	Kirby, 1802
Acu	1172	Acu1172	Fabricius	1777	soroeensis	(Fabricius, 1777)	Apis	soroeensis	Apis soroeensis	Fabricius, 1777
Acu	1176	Acu1176	Linnaeus	1761	hortorum	(Linnaeus, 1761)	Apis	hortorum	Apis hortorum	Linnaeus, 1761
Acu	1180	Acu1180	Fabricius	1775	ruderatus	(Fabricius, 1775)	Apis	ruderatus	Apis ruderatus	Fabricius, 1775
Acu	1187	Acu1187	Linnaeus	1758	lapidarius	(Linnaeus, 1758)	Apis	lapidarius	Apis lapidarius	Linnaeus, 1758
Acu	1194	Acu1194	Kirby	1802	barbutellus	(Kirby, 1802)	Apis	barbutellus	Apis barbutellus	Kirby, 1802
Acu	1195	Acu1195	Seidl	1837	bohemicus	(Seidl, 1837)	Apis	bohemicus	Apis bohemicus	Seidl, 1837
Acu	1197	Acu1197	Panzer	1801	campestris	(Panzer, 1801)	Apis	campestris	Apis campestris	Panzer, 1801
Acu	1202	Acu1202	Fabricius	1793	rupestris	(Fabricius, 1793)	Apis	rupestris	Apis rupestris	Fabricius, 1793
Acu	1204	Acu1204	Lepeletier	1832	sylvestris	(Lepeletier, 1832)	Psithyrus	sylvestris	Psithyrus sylvestris	Lepeletier, 1832
Acu	1206	Acu1206	Geoffroy	1785	vestalis	(Geoffroy, 1785)	Apis	vestalis	Apis vestalis	Geoffroy, 1785
Acu	1210	Acu1210	Linnaeus	1758	hypnorum	(Linnaeus, 1758)	Apis	hypnorum	Apis hypnorum	Linnaeus, 1758
Acu	1211	Acu1211	Kirby	1802	jonellus	(Kirby, 1802)	Apis	jonellus	Apis jonellus	Kirby, 1802
Acu	1222	Acu1222	Linnaeus	1761	pratorum	(Linnaeus, 1761)	Apis	pratorum	Apis pratorum	Linnaeus, 1761
Acu	1229	Acu1229	Panzer	1805	?pomorum	(Panzer, 1805)	Bremus	?pomorum	Bremus ?pomorum	Panzer, 1805
Acu	1233	Acu1233	Linnaeus	1758	subterraneus	(Linnaeus, 1758)	Apis	subterraneus	Apis subterraneus	Linnaeus, 1758
Acu	124	Acu124	Schreber	1784	peltarius	(Schreber, 1784)	Sphex	peltarius	Sphex peltarius	Schreber, 1784
Acu	1243	Acu1243	Linnaeus	1758	muscorum	(Linnaeus, 1758)	Apis	muscorum	Apis muscorum	Linnaeus, 1758
Acu	1254	Acu1254	Scopoli	1763	pascuorum	(Scopoli, 1763)	Apis	pascuorum	Apis pascuorum	Scopoli, 1763
Acu	1266	Acu1266	Müller	1776	ruderarius	(Müller, 1776)	Apis	ruderarius	Apis ruderarius	Müller, 1776
Acu	1269	Acu1269	Linnaeus	1761	sylvarum	(Linnaeus, 1761)	Apis	sylvarum	Apis sylvarum	Linnaeus, 1761
Acu	1277	Acu1277	Linnaeus	1758	longicornis	(Linnaeus, 1758)	Apis	longicornis	Apis longicornis	Linnaeus, 1758
Acu	128	Acu128	von Scheven	1781	scutellatus	(von Scheven, 1781)	Sphex	scutellatus	Sphex scutellatus	von Scheven, 1781
Acu	1285	Acu1285	Forster	1771	albifrons	(Forster, 1771)	Apis	albifrons	Apis albifrons	Forster, 1771
Acu	1288	Acu1288	Scopoli	1770	luctuosa	(Scopoli, 1770)	Apis	luctuosa	Apis luctuosa	Scopoli, 1770
Acu	1295	Acu1295	Panzer	1799	cruciger	(Panzer, 1799)	Nomada	cruciger	Nomada cruciger	Panzer, 1799
Acu	1297	Acu1297	Linnaeus	1758	variegatus	(Linnaeus, 1758)	Apis	variegatus	Apis variegatus	Linnaeus, 1758
Acu	1312	Acu1312	Linnaeus	1767	fabriciana	(Linnaeus, 1767)	Apis	fabriciana	Apis fabriciana	Linnaeus, 1767
Acu	1315	Acu1315	Linnaeus	1767	ferruginata	(Linnaeus, 1767)	Apis	ferruginata	Apis ferruginata	Linnaeus, 1767
Acu	1320	Acu1320	Kirby	1802	flavoguttata	(Kirby, 1802)	Apis	flavoguttata	Apis flavoguttata	Kirby, 1802
Acu	1322	Acu1322	Kirby	1802	flavopicta	(Kirby, 1802)	Apis	flavopicta	Apis flavopicta	Kirby, 1802
Acu	1331	Acu1331	Kirby	1802	goodeniana	(Kirby, 1802)	Apis	goodeniana	Apis goodeniana	Kirby, 1802
Acu	1343	Acu1343	Kirby	1802	lathburiana	(Kirby, 1802)	Apis	lathburiana	Apis lathburiana	Kirby, 1802
Acu	1345	Acu1345	Kirby	1802	leucophthalma	(Kirby, 1802)	Apis	leucophthalma	Apis leucophthalma	Kirby, 1802
Acu	1348	Acu1348	Kirby	1802	marshamella	(Kirby, 1802)	Apis	marshamella	Apis marshamella	Kirby, 1802
Acu	135	Acu135	Dahlbom	1844	congener	(Dahlbom, 1844)	Crabro	congener	Crabro congener	Dahlbom, 1844
Acu	1356	Acu1356	Linnaeus	1758	ruficornis	(Linnaeus, 1758)	Apis	ruficornis	Apis ruficornis	Linnaeus, 1758
Acu	136	Acu136	Vander Linden	1829	podagricus	(Vander Linden, 1829)	Crabro	podagricus	Crabro podagricus	Vander Linden, 1829
Acu	1365	Acu1365	Kirby	1802	sheppardana	(Kirby, 1802)	Apis	sheppardana	Apis sheppardana	Kirby, 1802
Acu	1380	Acu1380	Kirby	1802	cyanea	(Kirby, 1802)	Apis	cyanea	Apis cyanea	Kirby, 1802
Acu	1386	Acu1386	Linnaeus	1758	violacea	(Linnaeus, 1758)	Apis	violacea	Apis violacea	Linnaeus, 1758
Acu	1397	Acu1397	Geoffroy	1785	fodiens	(Geoffroy, 1785)	Apis	fodiens	Apis fodiens	Geoffroy, 1785
Acu	1403	Acu1403	Linnaeus	1758	succinctus	(Linnaeus, 1758)	Apis	succinctus	Apis succinctus	Linnaeus, 1758
Acu	1406	Acu1406	Linnaeus	1761	cunicularius	(Linnaeus, 1761)	Apis	cunicularius	Apis cunicularius	Linnaeus, 1761
Acu	1423	Acu1423	Kirby	1802	annularis	(Kirby, 1802)	Mellita	annularis	Mellita annularis	Kirby, 1802
Acu	1427	Acu1427	Kirby	1802	dilatatus	(Kirby, 1802)	Mellita	dilatatus	Mellita dilatatus	Kirby, 1802
Acu	143	Acu143	Panzer	1798	vagabundus	(Panzer, 1798)	Crabro	vagabundus	Crabro vagabundus	Panzer, 1798
Acu	1445	Acu1445	Panzer	1798	signatus	(Panzer, 1798)	Sphex	signatus	Sphex signatus	Panzer, 1798
Acu	1460	Acu1460	Christ	1791	rubicundus	(Christ, 1791)	Apis	rubicundus	Apis rubicundus	Christ, 1791
Acu	1469	Acu1469	Rossi	1792	subauratus	(Rossi, 1792)	Apis	subauratus	Apis subauratus	Rossi, 1792
Acu	1471	Acu1471	Linnaeus	1758	tumulorum	(Linnaeus, 1758)	Apis	tumulorum	Apis tumulorum	Linnaeus, 1758
Acu	1476	Acu1476	Pérez	1903	cupromicans	(Pérez, 1903)	Halictus	cupromicans	Halictus cupromicans	Pérez, 1903
Acu	1477	Acu1477	Kirby	1802	leucopus	(Kirby, 1802)	Melitta	leucopus	Melitta leucopus	Kirby, 1802
Acu	1481	Acu1481	Fabricius	1793	morio	(Fabricius, 1793)	Hylaeus	morio	Hylaeus morio	Fabricius, 1793
Acu	1482	Acu1482	Kirby	1802	smeathmanellum	(Kirby, 1802)	Melitta	smeathmanellum	Melitta smeathmanellum	Kirby, 1802
Acu	1485	Acu1485	Fabricius	1781	albipes	(Fabricius, 1781)	Apis	albipes	Apis albipes	Fabricius, 1781
Acu	1486	Acu1486	Perkins	1895	angusticeps	(Perkins, 1895)	Halictus	angusticeps	Halictus angusticeps	Perkins, 1895
Acu	1487	Acu1487	Schenck	1869	brevicorne	(Schenck, 1869)	Halictus	brevicorne	Halictus brevicorne	Schenck, 1869
Acu	1488	Acu1488	Scopoli	1763	calceatum	(Scopoli, 1763)	Apis	calceatum	Apis calceatum	Scopoli, 1763
Acu	1492	Acu1492	Pérez	1903	fratellum	(Pérez, 1903)	Halictus	fratellum	Halictus fratellum	Pérez, 1903
Acu	1496	Acu1496	Kirby	1802	fulvicorne	(Kirby, 1802)	Melitta	fulvicorne	Melitta fulvicorne	Kirby, 1802
Acu	1498	Acu1498	Kirby	1802	laeve	(Kirby, 1802)	Melitta	laeve	Melitta laeve	Kirby, 1802
Acu	1499	Acu1499	Schenck	1869	laticeps	(Schenck, 1869)	Halictus	laticeps	Halictus laticeps	Schenck, 1869
Acu	15	Acu15	Schrank	1781	boops	(Schrank, 1781)	Sphex	boops	Sphex boops	Schrank, 1781
Acu	1501	Acu1501	Kirby	1802	malachurum	(Kirby, 1802)	Melitta	malachurum	Melitta malachurum	Kirby, 1802
Acu	1503	Acu1503	Kirby	1802	minutissimum	(Kirby, 1802)	Melitta	minutissimum	Melitta minutissimum	Kirby, 1802
Acu	1505	Acu1505	Kirby	1802	nitidiusculum	(Kirby, 1802)	Melitta	nitidiusculum	Melitta nitidiusculum	Kirby, 1802
Acu	1506	Acu1506	Schenck	1853	parvulum	(Schenck, 1853)	Hylaeus	parvulum	Hylaeus parvulum	Schenck, 1853
Acu	1508	Acu1508	Brullé	1832	pauperatum	(Brullé, 1832)	Halictus	pauperatum	Halictus pauperatum	Brullé, 1832
Acu	1510	Acu1510	Schenck	1853	pauxillum	(Schenck, 1853)	Hylaeus	pauxillum	Hylaeus pauxillum	Schenck, 1853
Acu	1512	Acu1512	Schenck	1853	punctatissimum	(Schenck, 1853)	Hylaeus	punctatissimum	Hylaeus punctatissimum	Schenck, 1853
Acu	1514	Acu1514	Morawitz	1872	puncticolle	(Morawitz, 1872)	Halictus	puncticolle	Halictus puncticolle	Morawitz, 1872
Acu	1515	Acu1515	Zetterstedt	1838	rufitarse	(Zetterstedt, 1838)	Halictus	rufitarse	Halictus rufitarse	Zetterstedt, 1838
Acu	1517	Acu1517	Alfken	1914	semilucens	(Alfken, 1914)	Halictus	semilucens	Halictus semilucens	Alfken, 1914
Acu	1518	Acu1518	Schenck	1870	sexstrigatum	(Schenck, 1870)	Halictus	sexstrigatum	Halictus sexstrigatum	Schenck, 1870
Acu	1520	Acu1520	Kirby	1802	villosulum	(Kirby, 1802)	Melitta	villosulum	Melitta villosulum	Kirby, 1802
Acu	1524	Acu1524	Kirby	1802	laevigatum	(Kirby, 1802)	Melitta	laevigatum	Melitta laevigatum	Kirby, 1802
Acu	1526	Acu1526	Schenck	1853	lativentre	(Schenck, 1853)	Hylaeus	lativentre	Hylaeus lativentre	Schenck, 1853
Acu	1528	Acu1528	Schrank	1781	leucozonium	(Schrank, 1781)	Apis	leucozonium	Apis leucozonium	Schrank, 1781
Acu	1530	Acu1530	Smith	1848	prasinum	(Smith, 1848)	Halictus	prasinum	Halictus prasinum	Smith, 1848
Acu	1531	Acu1531	Kirby	1802	quadrinotatum	(Kirby, 1802)	Melitta	quadrinotatum	Melitta quadrinotatum	Kirby, 1802
Acu	1532	Acu1532	Kirby	1802	sexnotatum	(Kirby, 1802)	Melitta	sexnotatum	Melitta sexnotatum	Kirby, 1802
Acu	1534	Acu1534	Kirby	1802	xanthopus	(Kirby, 1802)	Melitta	xanthopus	Melitta xanthopus	Kirby, 1802
Acu	1536	Acu1536	Smith	1848	zonulum	(Smith, 1848)	Halictus	zonulum	Halictus zonulum	Smith, 1848
Acu	154	Acu154	Lepeletier & Brullé	1835	annulipes	(Lepeletier & Brullé, 1835)	Blepharipus	annulipes	Blepharipus annulipes	Lepeletier & Brullé, 1835
Acu	1541	Acu1541	Linnaeus	1767	ephippius	(Linnaeus, 1767)	Sphex	ephippius	Sphex ephippius	Linnaeus, 1767
Acu	1545	Acu1545	Kirby	1802	geoffrellus	(Kirby, 1802)	Melitta	geoffrellus	Melitta geoffrellus	Kirby, 1802
Acu	1548	Acu1548	Linnaeus	1758	gibbus	(Linnaeus, 1758)	Sphex	gibbus	Sphex gibbus	Linnaeus, 1758
Acu	1555	Acu1555	Kirby	1802	monilicornis	(Kirby, 1802)	Melitta	monilicornis	Melitta monilicornis	Kirby, 1802
Acu	1571	Acu1571	Nylander	1852	halictula	(Nylander, 1852)	Rhophites	halictula	Rhophites halictula	Nylander, 1852
Acu	1585	Acu1585	Linnaeus	1758	manicatum	(Linnaeus, 1758)	Apis	manicatum	Apis manicatum	Linnaeus, 1758
Acu	1589	Acu1589	Klug	1807	ornatula	(Klug, 1807)	Gyrodroma	ornatula	Gyrodroma ornatula	Klug, 1807
Acu	1591	Acu1591	Kirby	1802	phaeoptera	(Kirby, 1802)	Apis	phaeoptera	Apis phaeoptera	Kirby, 1802
Acu	1592	Acu1592	Kirby	1802	punctulatissima	(Kirby, 1802)	Apis	punctulatissima	Apis punctulatissima	Kirby, 1802
Acu	1602	Acu1602	Illiger	1806	conoidea	(Illiger, 1806)	Anthophora	conoidea	Anthophora conoidea	Illiger, 1806
Acu	1606	Acu1606	Kirby	1802	inermis	(Kirby, 1802)	Apis	inermis	Apis inermis	Kirby, 1802
Acu	161	Acu161	Shuckard	1837	capitosus	(Shuckard, 1837)	Crabro	capitosus	Crabro capitosus	Shuckard, 1837
		Acu161	Shuckard	1837	capitosus	(Shuckard, 1837)	Crabro		Crabro	Shuckard, 1837
Acu	1610	Acu1610	Linnaeus	1758	quadridentata	(Linnaeus, 1758)	Apis	quadridentata	Apis quadridentata	Linnaeus, 1758
Acu	1616	Acu1616	Lepeletier	1841	ericetorum	(Lepeletier, 1841)	Megachile	ericetorum	Megachile ericetorum	Lepeletier, 1841
Acu	1622	Acu1622	Kirby	1802	willughbiella	(Kirby, 1802)	Apis	willughbiella	Apis willughbiella	Kirby, 1802
Acu	1630	Acu1630	Linnaeus	1758	centuncularis	(Linnaeus, 1758)	Apis	centuncularis	Apis centuncularis	Linnaeus, 1758
Acu	1632	Acu1632	Kirby	1802	ligniseca	(Kirby, 1802)	Apis	ligniseca	Apis ligniseca	Kirby, 1802
Acu	1636	Acu1636	Kirby	1802	circumcincta	(Kirby, 1802)	Apis	circumcincta	Apis circumcincta	Kirby, 1802
Acu	1637	Acu1637	Kirby	1802	maritima	(Kirby, 1802)	Apis	maritima	Apis maritima	Kirby, 1802
Acu	164	Acu164	Shuckard	1837	cetratus	(Shuckard, 1837)	Crabro	cetratus	Crabro cetratus	Shuckard, 1837
		Acu164	Shuckard	1837	cetratus	(Shuckard, 1837)	Crabro		Crabro	Shuckard, 1837
Acu	1642	Acu1642	Kirby	1802	campanularum	(Kirby, 1802)	Apis	campanularum	Apis campanularum	Kirby, 1802
Acu	1643	Acu1643	Linnaeus	1758	florisomne	(Linnaeus, 1758)	Apis	florisomne	Apis florisomne	Linnaeus, 1758
Acu	1648	Acu1648	Linnaeus	1758	truncorum	(Linnaeus, 1758)	Apis	truncorum	Apis truncorum	Linnaeus, 1758
Acu	1652	Acu1652	Thomson	1872	claviventris	(Thomson, 1872)	Osmia	claviventris	Osmia claviventris	Thomson, 1872
Acu	1654	Acu1654	Kirby	1802	leucomelana	(Kirby, 1802)	Apis	leucomelana	Apis leucomelana	Kirby, 1802
Acu	1659	Acu1659	Kirby	1802	spinulosa	(Kirby, 1802)	Apis	spinulosa	Apis spinulosa	Kirby, 1802
Acu	1662	Acu1662	Linnaeus	1758	caerulescens	(Linnaeus, 1758)	Apis	caerulescens	Apis caerulescens	Linnaeus, 1758
Acu	1664	Acu1664	Fabricius	1804	niveata	(Fabricius, 1804)	Apis	niveata	Apis niveata	Fabricius, 1804
Acu	1666	Acu1666	Kirby	1802	leaiana	(Kirby, 1802)	Apis	leaiana	Apis leaiana	Kirby, 1802
Acu	1673	Acu1673	Zetterstedt	1838	inermis	(Zetterstedt, 1838)	Anthophora	inermis	Anthophora inermis	Zetterstedt, 1838
Acu	1678	Acu1678	Kirby	1802	xanthomelana	(Kirby, 1802)	Apis	xanthomelana	Apis xanthomelana	Kirby, 1802
Acu	1682	Acu1682	Schrank	1781	bicolor	(Schrank, 1781)	Apis	bicolor	Apis bicolor	Schrank, 1781
Acu	1685	Acu1685	Linnaeus	1758	bicornis	(Linnaeus, 1758)	Apis	bicornis	Apis bicornis	Linnaeus, 1758
Acu	169	Acu169	Linnaeus	1758	leucostomus	(Linnaeus, 1758)	Sphex	leucostomus	Sphex leucostomus	Linnaeus, 1758
		Acu169	Linnaeus	1758	leucostomus	(Linnaeus, 1758)	Sphex		Sphex	Linnaeus, 1758
Acu	1694	Acu1694	Fabricius	1793	hirtipes	(Fabricius, 1793)	Andrena	hirtipes	Andrena hirtipes	Fabricius, 1793
Acu	1710	Acu1710	Fabricius	1775	haemorrhoidalis	(Fabricius, 1775)	Andrena	haemorrhoidalis	Andrena haemorrhoidalis	Fabricius, 1775
Acu	1712	Acu1712	Panzer	1799	leporina	(Panzer, 1799)	Apis	leporina	Apis leporina	Panzer, 1799
Acu	1727	Acu1727	Thomson	1862	boops	(Thomson, 1862)	Anoxus	boops	Anoxus boops	Thomson, 1862
Acu	1728	Acu1728	Förster	1860	cephalotes	(Förster, 1860)	Perisemus	cephalotes	Perisemus cephalotes	Förster, 1860
Acu	1731	Acu1731	Jurine	1807	fuscicornis	(Jurine, 1807)	Omalus	fuscicornis	Omalus fuscicornis	Jurine, 1807
Acu	1745	Acu1745	Förster	1851	claripennis	(Förster, 1851)	Bethylus	claripennis	Bethylus claripennis	Förster, 1851
Acu	1802	Acu1802	Ashmead	1893	chittendenii	(Ashmead, 1893)	Anoxus	chittendenii	Anoxus chittendenii	Ashmead, 1893
Acu	181	Acu181	Rossi	1790	megacephalus	(Rossi, 1790)	Crabro	megacephalus	Crabro megacephalus	Rossi, 1790
		Acu181	Rossi	1790	megacephalus	(Rossi, 1790)	Crabro		Crabro	Rossi, 1790
Acu	1813	Acu1813	Fabricius	1805	depressa	(Fabricius, 1805)	Bethylus	depressa	Bethylus depressa	Fabricius, 1805
Acu	1825	Acu1825	Haliday	1838	subcyaneum	(Haliday, 1838)	Epyris	subcyaneum	Epyris subcyaneum	Haliday, 1838
Acu	1838	Acu1838	Linnaeus	1761	semiauratus	(Linnaeus, 1761)	Sphex	semiauratus	Sphex semiauratus	Linnaeus, 1761
Acu	1844	Acu1844	Fabricius	1793	nitidulus	(Fabricius, 1793)	Ichneumon	nitidulus	Ichneumon nitidulus	Fabricius, 1793
Acu	1855	Acu1855	Förster	1853	gracillima	(Förster, 1853)	Chrysogona	gracillima	Chrysogona gracillima	Förster, 1853
Acu	1857	Acu1857	Linnaeus	1758	ignita	(Linnaeus, 1758)	Sphex	ignita	Sphex ignita	Linnaeus, 1758
Acu	1877	Acu1877	Gerstäcker	1869	hirsuta	(Gerstäcker, 1869)	Chrysis	hirsuta	Chrysis hirsuta	Gerstäcker, 1869
Acu	1879	Acu1879	Harris	1776	radians	(Harris, 1776)	Chrysis	radians	Chrysis radians	Harris, 1776
Acu	1883	Acu1883	Shuckard	1836	neglecta	(Shuckard, 1836)	Chrysis	neglecta	Chrysis neglecta	Shuckard, 1836
Acu	1886	Acu1886	Linnaeus	1758	cyanea	(Linnaeus, 1758)	Sphex	cyanea	Sphex cyanea	Linnaeus, 1758
Acu	1892	Acu1892	Fabricius	1804	panzeri	(Fabricius, 1804)	Chrysis	panzeri	Chrysis panzeri	Fabricius, 1804
Acu	1897	Acu1897	Latreille	1801	ardens	(Latreille, 1801)	Chrysis	ardens	Chrysis ardens	Latreille, 1801
Acu	1898	Acu1898	Dahlbom	1854	coriaceum	(Dahlbom, 1854)	Hedychrum	coriaceum	Hedychrum coriaceum	Dahlbom, 1854
Acu	1899	Acu1899	Dahlbom	1845	cupreum	(Dahlbom, 1845)	Hedychrum	cupreum	Hedychrum cupreum	Dahlbom, 1845
Acu	190	Acu190	Lepeletier & Brullé	1835	nigritus	(Lepeletier & Brullé, 1835)	Blepharipus	nigritus	Blepharipus nigritus	Lepeletier & Brullé, 1835
Acu	1901	Acu1901	Rossi	1790	roseum	(Rossi, 1790)	Chrysis	roseum	Chrysis roseum	Rossi, 1790
Acu	1906	Acu1906	Scopoli	1763	nobile	(Scopoli, 1763)	Sphex	nobile	Sphex nobile	Scopoli, 1763
Acu	1913	Acu1913	Fabricius	1787	aeneus	(Fabricius, 1787)	Chrysis	aeneus	Chrysis aeneus	Fabricius, 1787
Acu	1914	Acu1914	Mocsáry	1887	puncticollis	(Mocsáry, 1887)	Ellampus	puncticollis	Ellampus puncticollis	Mocsáry, 1887
Acu	1917	Acu1917	Dahlbom	1831	truncatus	(Dahlbom, 1831)	Chrysis	truncatus	Chrysis truncatus	Dahlbom, 1831
Acu	1920	Acu1920	Linnaeus	1758	auratus	(Linnaeus, 1758)	Sphex	auratus	Sphex auratus	Linnaeus, 1758
Acu	1921	Acu1921	Scopoli	1763	violaceus	(Scopoli, 1763)	Sphex	violaceus	Sphex violaceus	Scopoli, 1763
Acu	1934	Acu1934	Dalman	1823	brachycerum	(Dalman, 1823)	Dryinus	brachycerum	Dryinus brachycerum	Dalman, 1823
Acu	1946	Acu1946	Dalman	1818	ephippiger	(Dalman, 1818)	Gonatopus	ephippiger	Gonatopus ephippiger	Dalman, 1818
Acu	1954	Acu1954	Haupt	1941	exiguum	(Haupt, 1941)	Chelogynus	exiguum	Chelogynus exiguum	Haupt, 1941
Acu	1958	Acu1958	Thomson	1860	faciale	(Thomson, 1860)	MISSING FROM WORD	faciale	MISSING FROM WORD faciale	Thomson, 1860
Acu	1960	Acu1960	Dalman	1818	flavicorne	(Dalman, 1818)	Gonatopus	flavicorne	Gonatopus flavicorne	Dalman, 1818
Acu	1963	Acu1963	Haliday	1828	fulviventre	(Haliday, 1828)	Dryinus	fulviventre	Dryinus fulviventre	Haliday, 1828
Acu	1977	Acu1977	Haliday	1837	infectum	(Haliday, 1837)	Dryinus	infectum	Dryinus infectum	Haliday, 1837
Acu	200	Acu200	Kohl	1892	styrius	(Kohl, 1892)	Crabro	styrius	Crabro styrius	Kohl, 1892
		Acu200	Kohl	1892	styrius	(Kohl, 1892)	Crabro		Crabro	Kohl, 1892
Acu	2000	Acu2000	Dalman	1818	pubicorne	(Dalman, 1818)	Gonatopus	pubicorne	Gonatopus pubicorne	Dalman, 1818
Acu	2016	Acu2016	Haliday	1837	scapulare	(Haliday, 1837)	Dryinus	scapulare	Dryinus scapulare	Haliday, 1837
Acu	2031	Acu2031	Dalman	1818	ruficornis	(Dalman, 1818)	Gonatopus	ruficornis	Gonatopus ruficornis	Dalman, 1818
Acu	204	Acu204	Shuckard	1837	walkeri	(Shuckard, 1837)	Crabro	walkeri	Crabro walkeri	Shuckard, 1837
		Acu204	Shuckard	1837	walkeri	(Shuckard, 1837)	Crabro		Crabro	Shuckard, 1837
Acu	2074	Acu2074	Dalman	1823	atratus	(Dalman, 1823)	Dryinus	atratus	Dryinus atratus	Dalman, 1823
Acu	2078	Acu2078	Dalman	1818	melaleucus	(Dalman, 1818)	Gonatopus	melaleucus	Gonatopus melaleucus	Dalman, 1818
Acu	2098	Acu2098	Linnaeus	1767	collaris	(Linnaeus, 1767)	Sphex	collaris	Sphex collaris	Linnaeus, 1767
Acu	213	Acu213	Morawitz	1866	distinguendus	(Morawitz, 1866)	Crabro	distinguendus	Crabro distinguendus	Morawitz, 1866
		Acu213	Morawitz	1866	distinguendus	(Morawitz, 1866)	Crabro		Crabro	Morawitz, 1866
Acu	2137	Acu2137	Haliday	1828	bicolor	(Haliday, 1828)	Dryinus	bicolor	Dryinus bicolor	Haliday, 1828
Acu	2144	Acu2144	Thunberg	1827	clavipes	(Thunberg, 1827)	Gelis	clavipes	Gelis clavipes	Thunberg, 1827
Acu	215	Acu215	Vander Linden	1829	elongatulus	(Vander Linden, Crabro)	Crabro	elongatulus	Crabro elongatulus	Vander Linden, Crabro
Acu	2167	Acu2167	Richards	1939	formicicolus	(Richards, 1939)	MISSING FROM WORD	formicicolus	MISSING FROM WORD formicicolus	Richards, 1939
Acu	2190	Acu2190	Westwood	1833	oratorius	(Westwood, 1833)	MISSING FROM WORD	oratorius	MISSING FROM WORD oratorius	Westwood, 1833
Acu	2202	Acu2202	Westwood	1833	ruddii	(Westwood, 1833)	Myrmecomorphus	ruddii	Myrmecomorphus ruddii	Westwood, 1833
Acu	2217	Acu2217	Mayr	1868	# humile	(Mayr, 1868)	Hypoclinea	# humile	Hypoclinea # humile	Mayr, 1868
Acu	2225	Acu2225	Latreille	1798	erraticum	(Latreille, 1798)	Formica	erraticum	Formica erraticum	Latreille, 1798
Acu	232	Acu232	Vander Linden	1829	exiguus	(Vander Linden, Crabro)	Crabro	exiguus	Crabro exiguus	Vander Linden, Crabro
		Acu232	Vander Linden	1829	exiguus	(Vander Linden, 1829)	Crabro		Crabro	Vander Linden, 1829
Acu	2341	Acu2341	Foerster	1850	alienus	(Foerster, 1850)	Formica	alienus	Formica alienus	Foerster, 1850
Acu	2344	Acu2344	Latreille	1798	brunneus	(Latreille, 1798)	Formica	brunneus	Formica brunneus	Latreille, 1798
Acu	2349	Acu2349	Olivier	1792	emarginatus	(Olivier, 1792)	Formica	emarginatus	Formica emarginatus	Olivier, 1792
Acu	2355	Acu2355	Fabricius	1781	flavus	(Fabricius, 1781)	Formica	flavus	Formica flavus	Fabricius, 1781
Acu	2367	Acu2367	Latreille	1798	fuliginosus	(Latreille, 1798)	Formica	fuliginosus	Formica fuliginosus	Latreille, 1798
Acu	2368	Acu2368	Bondroit	1920	meridionalis	(Bondroit, 1920)	Formicina	meridionalis	Formicina meridionalis	Bondroit, 1920
Acu	2369	Acu2369	Nylander	1846	mixtus	(Nylander, 1846)	Formica	mixtus	Formica mixtus	Nylander, 1846
Acu	2372	Acu2372	Linnaeus	1758	niger	(Linnaeus, 1758)	Formica	niger	Formica niger	Linnaeus, 1758
Acu	2382	Acu2382	Bondroit	1918	sabularum	(Bondroit, 1918)	Formicina	sabularum	Formicina sabularum	Bondroit, 1918
Acu	2383	Acu2383	Nylander	1846	umbratus	(Nylander, 1846)	Formica	umbratus	Formica umbratus	Nylander, 1846
Acu	239	Acu239	Linnaeus	1767	palmipes	(Linnaeus, 1767)	Sphex	palmipes	Sphex palmipes	Linnaeus, 1767
		Acu239	Linnaeus	1767	palmipes	(Linnaeus, 1767)	Sphex		Sphex	Linnaeus, 1767
Acu	24	Acu24	Dahlbom	1832	pinguis	(Dahlbom, 1832)	Larra	pinguis	Larra pinguis	Dahlbom, 1832
Acu	2413	Acu2413	Fabricius	1793	# megacephala	(Fabricius, 1793)	Formica	# megacephala	Formica # megacephala	Fabricius, 1793
Acu	2435	Acu2435	Olivier	1792	# scutellaris	(Olivier, 1792)	Formica	# scutellaris	Formica # scutellaris	Olivier, 1792
Acu	2447	Acu2447	Nylander	1846	nitidulus	(Nylander, 1846)	Myrmica	nitidulus	Myrmica nitidulus	Nylander, 1846
Acu	2454	Acu2454	Fabricius	1793	acervorum	(Fabricius, 1793)	Formica	acervorum	Formica acervorum	Fabricius, 1793
Acu	246	Acu246	Shuckard	1837	tarsatus	(Shuckard, 1837)	Crabro	tarsatus	Crabro tarsatus	Shuckard, 1837
		Acu246	Shuckard	1837	tarsatus	(Shuckard, 1837)	Crabro		Crabro	Shuckard, 1837
Acu	2463	Acu2463	Latreille	1802	graminicola	(Latreille, 1802)	Formica	graminicola	Formica graminicola	Latreille, 1802
Acu	2475	Acu2475	Schenck	1852	testaceus	(Schenck, 1852)	Eciton	testaceus	Eciton testaceus	Schenck, 1852
Acu	2490	Acu2490	Curtis	1854	albipennis	(Curtis, 1854)	Stenamma	albipennis	Stenamma albipennis	Curtis, 1854
Acu	2493	Acu2493	Schenck	1852	interruptus	(Schenck, 1852)	Myrmica	interruptus	Myrmica interruptus	Schenck, 1852
Acu	2496	Acu2496	Foerster	1850	nylanderi	(Foerster, 1850)	Myrmica	nylanderi	Myrmica nylanderi	Foerster, 1850
Acu	2500	Acu2500	Latreille	1798	# unifasciatus	(Latreille, 1798)	Formica	# unifasciatus	Formica # unifasciatus	Latreille, 1798
Acu	2518	Acu2518	Schenck	1852	atratulus	(Schenck, 1852)	Myrmica	atratulus	Myrmica atratulus	Schenck, 1852
Acu	2526	Acu2526	Linnaeus	1758	caespitum	(Linnaeus, 1758)	Formica	caespitum	Formica caespitum	Linnaeus, 1758
Acu	2557	Acu2557	Arnol’di	1930	karavajevi	(Arnol’di, 1930)	Symbiomyrma	karavajevi	Symbiomyrma karavajevi	Arnol’di, 1930
Acu	257	Acu257	Vander Linden	1829	wesmaeli	(Vander Linden, Crabro)	Crabro	wesmaeli	Crabro wesmaeli	Vander Linden, Crabro
		Acu257	Vander Linden	1829	wesmaeli	(Vander Linden, 1829)	Crabro		Crabro	Vander Linden, 1829
Acu	2574	Acu2574	Linnaeus	1758	rubra	(Linnaeus, 1758)	Formica	rubra	Formica rubra	Linnaeus, 1758
Acu	2658	Acu2658	Latreille	1798	fugax	(Latreille, 1798)	Formica	fugax	Formica fugax	Latreille, 1798
Acu	266	Acu266	Fabricius	1781	dimidiatus	(Fabricius, 1781)	Crabro	dimidiatus	Crabro dimidiatus	Fabricius, 1781
		Acu266	Fabricius	1781	dimidiatus	(Fabricius, 1781)	Crabro		Crabro	Fabricius, 1781
Acu	2688	Acu2688	Förster	1850	debile	(Förster, 1850)	Myrmica	debile	Myrmica debile	Förster, 1850
Acu	2698	Acu2698	Forel	1912	[# gibbinota	(Forel, 1912)	Ponera	[# gibbinota	Ponera [# gibbinota	Forel, 1912
Acu	2728	Acu2728	Latreille	1802	coarctata	(Latreille, 1802)	Formica	coarctata	Formica coarctata	Latreille, 1802
Acu	2743	Acu2743	Fabricius	1787	rufipes	(Fabricius, 1787)	Mutilla	rufipes	Mutilla rufipes	Fabricius, 1787
Acu	276	Acu276	Fabricius	1793	quadrimaculatus	(Fabricius, 1793)	Crabro	quadrimaculatus	Crabro quadrimaculatus	Fabricius, 1793
		Acu276	Fabricius	1793	quadrimaculatus	(Fabricius, 1793)	Crabro		Crabro	Fabricius, 1793
Acu	2761	Acu2761	Scopoli	1763	carbonarius	(Scopoli, 1763)	Sphex	carbonarius	Sphex carbonarius	Scopoli, 1763
Acu	2771	Acu2771	Spinola	1808	fasciatellus	(Spinola, 1808)	Pompilus	fasciatellus	Pompilus fasciatellus	Spinola, 1808
Acu	2788	Acu2788	Rossi	1792	notatus	(Rossi, 1792)	Sphex	notatus	Sphex notatus	Rossi, 1792
Acu	2800	Acu2800	Geoffroy	1785	bifasciatus	(Geoffroy, 1785)	Ichneumon	bifasciatus	Ichneumon bifasciatus	Geoffroy, 1785
Acu	2803	Acu2803	Magretti	1886	subintermedius	(Magretti, 1886)	Pogonius	subintermedius	Pogonius subintermedius	Magretti, 1886
Acu	2805	Acu2805	Linnaeus	1758	variegatus	(Linnaeus, 1758)	Sphex	variegatus	Sphex variegatus	Linnaeus, 1758
Acu	2813	Acu2813	Shuckard	1837	agilis	(Shuckard, 1837)	Pompilus	agilis	Pompilus agilis	Shuckard, 1837
Acu	2820	Acu2820	Fabricius	1775	exaltata	(Fabricius, 1775)	Sphex	exaltata	Sphex exaltata	Fabricius, 1775
Acu	2827	Acu2827	Fabricius	1793	hyalinata	(Fabricius, 1793)	Sphex	hyalinata	Sphex hyalinata	Fabricius, 1793
Acu	2842	Acu2842	Lepeletier	1845	propinqua	(Lepeletier, 1845)	Calicurgus	propinqua	Calicurgus propinqua	Lepeletier, 1845
Acu	2844	Acu2844	Schiødte	1837	pusilla	(Schiødte, 1837)	Pompilus	pusilla	Pompilus pusilla	Schiødte, 1837
Acu	2851	Acu2851	Harris	1780	perturbator	(Harris, 1780)	Sphex	perturbator	Sphex perturbator	Harris, 1780
Acu	286	Acu286	Thomson	1870	cavifrons	(Thomson, 1870)	Crabro	cavifrons	Crabro cavifrons	Thomson, 1870
		Acu286	Thomson	1870	cavifrons	(Thomson, 1870)	Crabro		Crabro	Thomson, 1870
Acu	2867	Acu2867	Spinola	1808	cinctellus	(Spinola, 1808)	Pompilus	cinctellus	Pompilus cinctellus	Spinola, 1808
Acu	2871	Acu2871	Vander Linden	1827	sericeus	(Vander Linden, 1827)	Pompilus	sericeus	Pompilus sericeus	Vander Linden, 1827
Acu	288	Acu288	Panzer	1804	lapidarius	(Panzer, 1804)	Crabro	lapidarius	Crabro lapidarius	Panzer, 1804
		Acu288	Panzer	1804	lapidarius	(Panzer, 1804)	Crabro		Crabro	Panzer, 1804
Acu	2880	Acu2880	Aurivillius	1907	caviventris	(Aurivillius, 1907)	Pompilus	caviventris	Pompilus caviventris	Aurivillius, 1907
Acu	2884	Acu2884	Dahlbom	1845	concinnus	(Dahlbom, 1845)	Pompilus	concinnus	Pompilus concinnus	Dahlbom, 1845
Acu	2890	Acu2890	Scopoli	1763	nigerrimus	(Scopoli, 1763)	Sphex	nigerrimus	Sphex nigerrimus	Scopoli, 1763
Acu	2901	Acu2901	Vander Linden	1827	infuscatus	(Vander Linden, 1827)	Pompilus	infuscatus	Pompilus infuscatus	Vander Linden, 1827
Acu	2923	Acu2923	Linnaeus	1758	viaticus	(Linnaeus, 1758)	Sphex	viaticus	Sphex viaticus	Linnaeus, 1758
Acu	2947	Acu2947	Wesmael	1851	anceps	(Wesmael, 1851)	Pompilus	anceps	Pompilus anceps	Wesmael, 1851
Acu	2958	Acu2958	Dahlbom	1843	consobrina	(Dahlbom, 1843)	Pompilus	consobrina	Pompilus consobrina	Dahlbom, 1843
Acu	2971	Acu2971	Dahlbom	1843	trivialis	(Dahlbom, 1843)	Pompilus	trivialis	Pompilus trivialis	Dahlbom, 1843
Acu	2977	Acu2977	Thomson	1870	wesmaeli	(Thomson, 1870)	Pompilus	wesmaeli	Pompilus wesmaeli	Thomson, 1870
Acu	2980	Acu2980	Dahlbom	1842	minutula	(Dahlbom, 1842)	Pompilus	minutula	Pompilus minutula	Dahlbom, 1842
Acu	2987	Acu2987	Schiødte	1837	spissa	(Schiødte, 1837)	Pompilus	spissa	Pompilus spissa	Schiødte, 1837
Acu	299	Acu299	Zetterstedt	1838	ruficornis	(Zetterstedt, 1838)	Crabro	ruficornis	Crabro ruficornis	Zetterstedt, 1838
		Acu299	Zetterstedt	1838	ruficornis	(Zetterstedt, 1838)	Crabro		Crabro	Zetterstedt, 1838
Acu	2992	Acu2992	Haupt	1927	rufa	(Haupt, 1927)	Psammochares	rufa	Psammochares rufa	Haupt, 1927
Acu	2998	Acu2998	Tournier	1889	gallicum	(Tournier, 1889)	Pompilus	gallicum	Pompilus gallicum	Tournier, 1889
Acu	3001	Acu3001	Linnaeus	1758	rufipes	(Linnaeus, 1758)	Sphex	rufipes	Sphex rufipes	Linnaeus, 1758
Acu	3023	Acu3023	Shuckard	1835	crassicornis	(Shuckard, 1835)	Pompilus	crassicornis	Pompilus crassicornis	Shuckard, 1835
Acu	3026	Acu3026	Vander Linden	1827	dubius	(Vander Linden, 1827)	Aporus	dubius	Aporus dubius	Vander Linden, 1827
Acu	3032	Acu3032	Linnaeus	1758	pectinipes	(Linnaeus, 1758)	Sphex	pectinipes	Sphex pectinipes	Linnaeus, 1758
Acu	3040	Acu3040	Fabricius	1793	sanguinolentus	(Fabricius, 1793)	Sphex	sanguinolentus	Sphex sanguinolentus	Fabricius, 1793
Acu	3050	Acu3050	Fabricius	1775	cinereus	(Fabricius, 1775)	Sphex	cinereus	Sphex cinereus	Fabricius, 1775
Acu	3064	Acu3064	Fabricius	1775	maculata	(Fabricius, 1775)	Evania	maculata	Evania maculata	Fabricius, 1775
Acu	3070	Acu3070	Fabricius	1798	variegata	(Fabricius, 1798)	Evania	variegata	Evania variegata	Fabricius, 1798
Acu	3076	Acu3076	Linnaeus	1758	clavicornis	(Linnaeus, 1758)	Apis	clavicornis	Apis clavicornis	Linnaeus, 1758
Acu	3079	Acu3079	Fabricius	1781	quinquepunctata	(Fabricius, 1781)	Scolia	quinquepunctata	Scolia quinquepunctata	Fabricius, 1781
Acu	308	Acu308	Fabricius	1775	sexcinctus	(Fabricius, 1775)	Crabro	sexcinctus	Crabro sexcinctus	Fabricius, 1775
		Acu308	Fabricius	1775	sexcinctus	(Fabricius, 1775)	Crabro		Crabro	Fabricius, 1775
Acu	3105	Acu3105	Panzer	1798	antilope	(Panzer, 1798)	Vespa	antilope	Vespa antilope	Panzer, 1798
Acu	3109	Acu3109	Panzer	1798	gazella	(Panzer, 1798)	Vespa	gazella	Vespa gazella	Panzer, 1798
Acu	3111	Acu3111	Curtis	1826	nigricornis	(Curtis, 1826)	Odynerus	nigricornis	Odynerus nigricornis	Curtis, 1826
Acu	3115	Acu3115	Wesmael	1836	oviventris	(Wesmael, 1836)	Odynerus	oviventris	Odynerus oviventris	Wesmael, 1836
Acu	3118	Acu3118	Linnaeus	1758	parietinus	(Linnaeus, 1758)	Vespa	parietinus	Vespa parietinus	Linnaeus, 1758
Acu	3121	Acu3121	Linnaeus	1758	parietum	(Linnaeus, 1758)	Vespa	parietum	Vespa parietum	Linnaeus, 1758
Acu	3122	Acu3122	Curtis	1826	scoticus	(Curtis, 1826)	Odynerus	scoticus	Odynerus scoticus	Curtis, 1826
Acu	3125	Acu3125	Müller	1776	trifasciatus	(Müller, 1776)	Vespa	trifasciatus	Vespa trifasciatus	Müller, 1776
Acu	3130	Acu3130	Linnaeus	1758	coarctatus	(Linnaeus, 1758)	Vespa	coarctatus	Vespa coarctatus	Linnaeus, 1758
Acu	3135	Acu3135	Fabricius	1793	quadrifasciatus	(Fabricius, 1793)	Vespa	quadrifasciatus	Vespa quadrifasciatus	Fabricius, 1793
Acu	3139	Acu3139	Shuckard	1837	laevipes	(Shuckard, 1837)	Odynerus	laevipes	Odynerus laevipes	Shuckard, 1837
Acu	3142	Acu3142	Herrich-Schäffer	1839	exilis	(Herrich-Schäffer, 1839)	Odynerus	exilis	Odynerus exilis	Herrich-Schäffer, 1839
Acu	3147	Acu3147	Gmelin	1790	melanocephalus	(Gmelin, 1790)	Vespa	melanocephalus	Vespa melanocephalus	Gmelin, 1790
Acu	3148	Acu3148	Linnaeus	1758	spinipes	(Linnaeus, 1758)	Vespa	spinipes	Vespa spinipes	Linnaeus, 1758
Acu	3153	Acu3153	Gmelin	1790	reniformis	(Gmelin, 1790)	Vespa	reniformis	Vespa reniformis	Gmelin, 1790
Acu	3157	Acu3157	Saussure	1855	herrichii	(Saussure, 1855)	Odynerus	herrichii	Odynerus herrichii	Saussure, 1855
Acu	3162	Acu3162	Linnaeus	1761	bifasciatus	(Linnaeus, 1761)	Vespa	bifasciatus	Vespa bifasciatus	Linnaeus, 1761
Acu	3166	Acu3166	Curtis	1826	connexus	(Curtis, 1826)	Odynerus	connexus	Odynerus connexus	Curtis, 1826
Acu	3168	Acu3168	Panzer	1798	crassicornis	(Panzer, 1798)	Vespa	crassicornis	Vespa crassicornis	Panzer, 1798
Acu	3169	Acu3169	Brullé	1832	gracilis	(Brullé, 1832)	Odynerus	gracilis	Odynerus gracilis	Brullé, 1832
Acu	3174	Acu3174	Christ	1791	dominula	(Christ, 1791)	Vespa	dominula	Vespa dominula	Christ, 1791
Acu	3187	Acu3187	Linnaeus	1767	gallicus	(Linnaeus, 1767)	Vespa	gallicus	Vespa gallicus	Linnaeus, 1767
Acu	3198	Acu3198	Retzius	1783	media	(Retzius, 1783)	Vespa	media	Vespa media	Retzius, 1783
Acu	3208	Acu3208	Fabricius	1781	norwegica	(Fabricius, 1781)	Vespa	norwegica	Vespa norwegica	Fabricius, 1781
Acu	3215	Acu3215	Fabricius	1793	saxonica	(Fabricius, 1793)	Vespa	saxonica	Vespa saxonica	Fabricius, 1793
Acu	3221	Acu3221	Scopoli	1763	sylvestris	(Scopoli, 1763)	Vespa	sylvestris	Vespa sylvestris	Scopoli, 1763
Acu	324	Acu324	Zetterstedt	1838	borealis	(Zetterstedt, 1838)	Crabro	borealis	Crabro borealis	Zetterstedt, 1838
		Acu324	Zetterstedt	1838	borealis	(Zetterstedt, 1838)	Crabro		Crabro	Zetterstedt, 1838
Acu	3258	Acu3258	Panzer	1799	austriaca	(Panzer, 1799)	Vespa	austriaca	Vespa austriaca	Panzer, 1799
Acu	3264	Acu3264	Fabricius	1793	germanica	(Fabricius, 1793)	Vespa	germanica	Vespa germanica	Fabricius, 1793
Acu	3267	Acu3267	Linnaeus	1758	rufa	(Linnaeus, 1758)	Vespa	rufa	Vespa rufa	Linnaeus, 1758
Acu	3274	Acu3274	Linnaeus	1758	vulgaris	(Linnaeus, 1758)	Vespa	vulgaris	Vespa vulgaris	Linnaeus, 1758
Acu	330	Acu330	Lepeletier & Brullé	1835	dives	(Lepeletier & Brullé, 1835)	Solenius	dives	Solenius dives	Lepeletier & Brullé, 1835
Acu	34	Acu34	Fabricius	1798	lunicornis	(Fabricius, 1798)	Pompilus	lunicornis	Pompilus lunicornis	Fabricius, 1798
Acu	344	Acu344	Fabricius	1804	continuus	(Fabricius, 1804)	Crabro	continuus	Crabro continuus	Fabricius, 1804
Acu	356	Acu356	Dufour & Perris	1840	rubicola	(Dufour & Perris, 1840)	Solenius	rubicola	Solenius rubicola	Dufour & Perris, 1840
Acu	362	Acu362	Olivier	1792	cephalotes	(Olivier, 1792)	Crabro	cephalotes	Crabro cephalotes	Olivier, 1792
Acu	377	Acu377	Panzer	1805	lituratus	(Panzer, 1805)	Crabro	lituratus	Crabro lituratus	Panzer, 1805
Acu	393	Acu393	Vander Linden	1829	brevis	(Vander Linden, 1829)	Crabro	brevis	Crabro brevis	Vander Linden, 1829
Acu	40	Acu40	Shuckard	1837	fargeii	(Shuckard, 1837)	Gorytes	fargeii	Gorytes fargeii	Shuckard, 1837
Acu	400	Acu400	Schreber	1759	clypeata	(Schreber, 1759)	Apis	clypeata	Apis clypeata	Schreber, 1759
Acu	411	Acu411	Fabricius	1793	albilabris	(Fabricius, 1793)	Crabro	albilabris	Crabro albilabris	Fabricius, 1793
Acu	413	Acu413	Vander Linden	1829	panzeri	(Vander Linden, 1829)	Crabro	panzeri	Crabro panzeri	Vander Linden, 1829
Acu	418	Acu418	Rossi	1794	pygmaeus	(Rossi, 1794)	Crabro	pygmaeus	Crabro pygmaeus	Rossi, 1794
Acu	426	Acu426	Linnaeus	1758	clavipes	(Linnaeus, 1758)	Sphex	clavipes	Sphex clavipes	Linnaeus, 1758
Acu	432	Acu432	Scopoli	1763	coarctatum	(Scopoli, 1763)	Sphex	coarctatum	Sphex coarctatum	Scopoli, 1763
Acu	44	Acu44	Linnaeus	1761	mystaceus	(Linnaeus, 1761)	Sphex	mystaceus	Sphex mystaceus	Linnaeus, 1761
Acu	446	Acu446	Spinola	1805	nitidus	(Spinola, 1805)	Astata	nitidus	Astata nitidus	Spinola, 1805
Acu	449	Acu449	Schenck	1857	obscuripennis	(Schenck, 1857)	Tachytes	obscuripennis	Tachytes obscuripennis	Schenck, 1857
Acu	451	Acu451	Panzer	1805	pompiliformis	(Panzer, 1805)	Larra	pompiliformis	Larra pompiliformis	Panzer, 1805
Acu	467	Acu467	Panzer	1809	unicolor	(Panzer, 1809)	Larra	unicolor	Larra unicolor	Panzer, 1809
Acu	510	Acu510	Linnaeus	1758	uniglumis	(Linnaeus, 1758)	Vespa	uniglumis	Vespa uniglumis	Linnaeus, 1758
Acu	533	Acu533	Linnaeus	1758	figulus	(Linnaeus, 1758)	Sphex	figulus	Sphex figulus	Linnaeus, 1758
Acu	547	Acu547	Fabricius	1793	pictus	(Fabricius, 1793)	Crabro	pictus	Crabro pictus	Fabricius, 1793
Acu	553	Acu553	Linnaeus	1758	arvensis	(Linnaeus, 1758)	Vespa	arvensis	Vespa arvensis	Linnaeus, 1758
Acu	574	Acu574	Thunberg	1791	crabroneus	(Thunberg, 1791)	Sphex	crabroneus	Sphex crabroneus	Thunberg, 1791
Acu	594	Acu594	Fabricius	1793	minutus	(Fabricius, 1793)	Crabro	minutus	Crabro minutus	Fabricius, 1793
Acu	596	Acu596	Vander Linden	1829	tristis	(Vander Linden, 1829)	Pemphredon	tristis	Pemphredon tristis	Vander Linden, 1829
Acu	60	Acu60	Lepeletier	1832	laticinctus	(Lepeletier, 1832)	Euspongus	laticinctus	Euspongus laticinctus	Lepeletier, 1832
Acu	606	Acu606	Curtis	1834	gracilis	(Curtis, 1834)	Diodontus	gracilis	Diodontus gracilis	Curtis, 1834
Acu	61	Acu61	Fabricius	1804	quadrifasciatus	(Fabricius, 1804)	Mellinus	quadrifasciatus	Mellinus quadrifasciatus	Fabricius, 1804
Acu	610	Acu610	Vander Linden	1829	insignis	(Vander Linden, 1829)	Pemphredon	insignis	Pemphredon insignis	Vander Linden, 1829
Acu	627	Acu627	Kohl	1888	austriaca	(Kohl, 1888)	Diphlebus	austriaca	Diphlebus austriaca	Kohl, 1888
Acu	636	Acu636	Shuckard	1837	lethifer	(Shuckard, 1837)	Cemonus	lethifer	Cemonus lethifer	Shuckard, 1837
Acu	655	Acu655	Fabricius	1793	lugubris	(Fabricius, 1793)	Crabro	lugubris	Crabro lugubris	Fabricius, 1793
Acu	670	Acu670	Dahlbom	1844	rugifer	(Dahlbom, 1844)	Cemonus	rugifer	Cemonus rugifer	Dahlbom, 1844
Acu	69	Acu69	Panzer	1801	tumidus	(Panzer, 1801)	Pompilus	tumidus	Pompilus tumidus	Panzer, 1801
Acu	690	Acu690	Dahlbom	1844	curruca	(Dahlbom, 1844)	Celia	curruca	Celia curruca	Dahlbom, 1844
Acu	694	Acu694	Vander Linden	1829	troglodytes	(Vander Linden, 1829)	Stigmus	troglodytes	Stigmus troglodytes	Vander Linden, 1829
Acu	713	Acu713	Jurine	1807	bicolor	(Jurine, 1807)	Psen	bicolor	Psen bicolor	Jurine, 1807
Acu	718	Acu718	Fabricius	1804	equestris	(Fabricius, 1804)	Trypoxylon	equestris	Trypoxylon equestris	Fabricius, 1804
Acu	720	Acu720	Fabricius	1787	lutaria	(Fabricius, 1787)	Sphex	lutaria	Sphex lutaria	Fabricius, 1787
Acu	728	Acu728	Morawitz	1891	atratina	(Morawitz, 1891)	Mimesa	atratina	Mimesa atratina	Morawitz, 1891
Acu	733	Acu733	Wesmael	1852	dahlbomi	(Wesmael, 1852)	Mimesa	dahlbomi	Mimesa dahlbomi	Wesmael, 1852
Acu	734	Acu734	Bondroit	1934	littoralis	(Bondroit, 1934)	Mimesa	littoralis	Mimesa littoralis	Bondroit, 1934
Acu	739	Acu739	Richards	1948	spooneri	(Richards, 1948)	Mimesa	spooneri	Mimesa spooneri	Richards, 1948
Acu	740	Acu740	Vander Linden	1829	unicolor	(Vander Linden, 1829)	Psen	unicolor	Psen unicolor	Vander Linden, 1829
Acu	751	Acu751	Olivier	1792	ater	(Olivier, 1792)	Crabro	ater	Crabro ater	Olivier, 1792
Acu	76	Acu76	Rossi	1794	bicinctus	(Rossi, 1794)	Crabro	bicinctus	Crabro bicinctus	Rossi, 1794
Acu	763	Acu763	Dahlbom	1843	concolor	(Dahlbom, 1843)	Psen	concolor	Psen concolor	Dahlbom, 1843
Acu	766	Acu766	Panzer	1798	pallipes	(Panzer, 1798)	Sphex	pallipes	Sphex pallipes	Panzer, 1798
Acu	776	Acu776	Tournier	1889	schencki	(Tournier, 1889)	Psen	schencki	Psen schencki	Tournier, 1889
Acu	793	Acu793	Linnaeus	1758	arenaria	(Linnaeus, 1758)	Sphex	arenaria	Sphex arenaria	Linnaeus, 1758
Acu	801	Acu801	Panzer	1799	quadricincta	(Panzer, 1799)	Philanthus	quadricincta	Philanthus quadricincta	Panzer, 1799
Acu	803	Acu803	Rossi	1792	quinquefasciata	(Rossi, 1792)	Crabro	quinquefasciata	Crabro quinquefasciata	Rossi, 1792
Acu	807	Acu807	Fabricius	1793	ruficornis	(Fabricius, 1793)	Philanthus	ruficornis	Philanthus ruficornis	Fabricius, 1793
Acu	815	Acu815	Linnaeus	1771	rybyensis	(Linnaeus, 1771)	Sphex	rybyensis	Sphex rybyensis	Linnaeus, 1771
Acu	826	Acu826	Panzer	1799	sabulosa	(Panzer, 1799)	Philanthus	sabulosa	Philanthus sabulosa	Panzer, 1799
Acu	843	Acu843	Fabricius	1775	triangulum	(Fabricius, 1775)	Vespa	triangulum	Vespa triangulum	Fabricius, 1775
Acu	85	Acu85	Fabricius	1798	interruptus	(Fabricius, 1798)	Mellinus	interruptus	Mellinus interruptus	Fabricius, 1798
Acu	869	Acu869	Linnaeus	1758	sabulosa	(Linnaeus, 1758)	Sphex	sabulosa	Sphex sabulosa	Linnaeus, 1758
Acu	883	Acu883	Kirby	1798	affinis	(Kirby, 1798)	Ammophila	affinis	Ammophila affinis	Kirby, 1798
Acu	886	Acu886	Scopoli	1763	hirsuta	(Scopoli, 1763)	Sphex	hirsuta	Sphex hirsuta	Scopoli, 1763
Acu	89	Acu89	Forster	1771	spinosus	(Forster, 1771)	Sphex	spinosus	Sphex spinosus	Forster, 1771
Acu	903	Acu903	Kirby	1802	clarkella	(Kirby, 1802)	Melitta	clarkella	Melitta clarkella	Kirby, 1802
Acu	905	Acu905	Müller	1766	fulva	(Müller, 1766)	Apis	fulva	Apis fulva	Müller, 1766
Acu	907	Acu907	Linnaeus	1758	helvola	(Linnaeus, 1758)	Apis	helvola	Apis helvola	Linnaeus, 1758
Acu	910	Acu910	Scopoli	1763	praecox	(Scopoli, 1763)	Apis	praecox	Apis praecox	Scopoli, 1763
Acu	915	Acu915	Kirby	1802	varians	(Kirby, 1802)	Melitta	varians	Melitta varians	Kirby, 1802
Acu	920	Acu920	Fabricius	1775	hattorfiana	(Fabricius, 1775)	Nomada	hattorfiana	Nomada hattorfiana	Fabricius, 1775
Acu	928	Acu928	Christ	1791	fulvago	(Christ, 1791)	Apis	fulvago	Apis fulvago	Christ, 1791
Acu	932	Acu932	Kirby	1802	denticulata	(Kirby, 1802)	Melitta	denticulata	Melitta denticulata	Kirby, 1802
Acu	934	Acu934	Kirby	1802	fuscipes	(Kirby, 1802)	Melitta	fuscipes	Melitta fuscipes	Kirby, 1802
Acu	935	Acu935	Kirby	1802	nigriceps	(Kirby, 1802)	Melitta	nigriceps	Melitta nigriceps	Kirby, 1802
Acu	938	Acu938	Kirby	1802	tridentata	(Kirby, 1802)	Melitta	tridentata	Melitta tridentata	Kirby, 1802
Acu	954	Acu954	Kirby	1802	labialis	(Kirby, 1802)	Melitta	labialis	Melitta labialis	Kirby, 1802
Acu	96	Acu96	Rossi	1790	trimaculatus	(Rossi, 1790)	MISSING FROM WORD	trimaculatus	MISSING FROM WORD trimaculatus	Rossi, 1790
Acu	972	Acu972	Kirby	1802	trimmerana	(Kirby, 1802)	Melitta	trimmerana	Melitta trimmerana	Kirby, 1802
Acu	978	Acu978	Kirby	1802	barbilabris	(Kirby, 1802)	Melitta	barbilabris	Melitta barbilabris	Kirby, 1802
Acu	992	Acu992	Linnaeus	1758	cineraria	(Linnaeus, 1758)	Apis	cineraria	Apis cineraria	Linnaeus, 1758
Acu	993	Acu993	Kirby	1802	nigroaenea	(Kirby, 1802)	Melitta	nigroaenea	Melitta nigroaenea	Kirby, 1802
Acu	995	Acu995	Müller	1776	nitida	(Müller, 1776)	Apis	nitida	Apis nitida	Müller, 1776
Acu	998	Acu998	Fabricius	1775	thoracica	(Fabricius, 1775)	Apis	thoracica	Apis thoracica	Fabricius, 1775
diap	169	diap169	Kieffer	1907	fuscipes	(Kieffer, 1907)	Pantoclis	fuscipes	Pantoclis fuscipes	Kieffer, 1907
diap	178	diap178	Kieffer	1907	lusitanicus	(Kieffer, 1907)	Miota	lusitanicus	Miota lusitanicus	Kieffer, 1907
diap	198	diap198	Kieffer	1910	compressa	(Kieffer, 1910)	Miota	compressa	Miota compressa	Kieffer, 1910
diap	199	diap199	Kieffer	1910	longiventris	(Kieffer, 1910)	Miota	longiventris	Miota longiventris	Kieffer, 1910
diap	202	diap202	Nees	1834	bisulca	(Nees, 1834)	Belyta	bisulca	Belyta bisulca	Nees, 1834
diap	216	diap216	Nixon	1957	fragilis	(Nixon, 1957)	Cinelaptus	fragilis	Cinelaptus fragilis	Nixon, 1957
diap	220	diap220	Kieffer	1907	abbreviata	(Kieffer, 1907)	Leptorhaptus	abbreviata	Leptorhaptus abbreviata	Kieffer, 1907
diap	221	diap221	Kieffer	1910	analis	(Kieffer, 1910)	Leptorhaptus	analis	Leptorhaptus analis	Kieffer, 1910
diap	222	diap222	Kieffer	1910	atriceps	(Kieffer, 1910)	Leptorhaptus	atriceps	Leptorhaptus atriceps	Kieffer, 1910
diap	223	diap223	Thomson	1859	compressa	(Thomson, 1859)	Cinetus	compressa	Cinetus compressa	Thomson, 1859
diap	224	diap224	Nixon	1957	docilis	(Nixon, 1957)	Leptorhaptus	docilis	Leptorhaptus docilis	Nixon, 1957
diap	225	diap225	Kieffer	1910	egregia	(Kieffer, 1910)	Leptorhaptus	egregia	Leptorhaptus egregia	Kieffer, 1910
diap	226	diap226	Kieffer	1910	flavidicornis	(Kieffer, 1910)	Leptorhaptus	flavidicornis	Leptorhaptus flavidicornis	Kieffer, 1910
diap	227	diap227	Kieffer	1907	fungorum	(Kieffer, 1907)	Leptorhaptus	fungorum	Leptorhaptus fungorum	Kieffer, 1907
diap	229	diap229	Kieffer	1910	incisa	(Kieffer, 1910)	Leptorhaptus	incisa	Leptorhaptus incisa	Kieffer, 1910
diap	230	diap230	Kieffer	1910	monilicornis	(Kieffer, 1910)	Leptorhaptus	monilicornis	Leptorhaptus monilicornis	Kieffer, 1910
diap	232	diap232	Kieffer	1910	perplexa	(Kieffer, 1910)	Leptorhaptus	perplexa	Leptorhaptus perplexa	Kieffer, 1910
diap	233	diap233	Thomson	1858	polita	(Thomson, 1858)	Cinetus	polita	Cinetus polita	Thomson, 1858
diap	238	diap238	Kieffer	1910	tenuicornis	(Kieffer, 1910)	Leptorhaptus	tenuicornis	Leptorhaptus tenuicornis	Kieffer, 1910
diap	244	diap244	Chambers	1974	longiscapa	(Chambers, 1974)	Pantoclis	longiscapa	Pantoclis longiscapa	Chambers, 1974
diap	249	diap249	Kieffer	1916	brevior	(Kieffer, 1916)	Acropiesta	brevior	Acropiesta brevior	Kieffer, 1916
diap	25	diap25	Kieffer	1909	acuta	(Kieffer, 1909)	Anectata	acuta	Anectata acuta	Kieffer, 1909
diap	252	diap252	Nees	1834	?brevis	(Nees, 1834)	Belyta	?brevis	Belyta ?brevis	Nees, 1834
diap	253	diap253	Thomson	1858	carinata	(Thomson, 1858)	Belyta	carinata	Belyta carinata	Thomson, 1858
diap	258	diap258	Kieffer	1907	leviventris	(Kieffer, 1907)	Oxylabis	leviventris	Oxylabis leviventris	Kieffer, 1907
diap	259	diap259	Thomson	1858	longipennis	(Thomson, 1858)	Belyta	longipennis	Belyta longipennis	Thomson, 1858
diap	26	diap26	Thomson	1858	alticollis	(Thomson, 1858)	Acoretus	alticollis	Acoretus alticollis	Thomson, 1858
diap	265	diap265	Thomson	1858	similis	(Thomson, 1858)	Belyta	similis	Belyta similis	Thomson, 1858
diap	267	diap267	Thomson	1858	striola	(Thomson, 1858)	Belyta	striola	Belyta striola	Thomson, 1858
diap	270	diap270	Thomson	1858	sulcata	(Thomson, 1858)	Belyta	sulcata	Belyta sulcata	Thomson, 1858
diap	275	diap275	Nixon	1957	cebes	(Nixon, 1957)	Miota	cebes	Miota cebes	Nixon, 1957
diap	278	diap278	Thomson	1858	fuscipennis	(Thomson, 1858)	Belyta	fuscipennis	Belyta fuscipennis	Thomson, 1858
diap	283	diap283	Kieffer	1909	brevinervis	(Kieffer, 1909)	Aclista	brevinervis	Aclista brevinervis	Kieffer, 1909
diap	284	diap284	Thomson	1858	claviscapa	(Thomson, 1858)	Belyta	claviscapa	Belyta claviscapa	Thomson, 1858
diap	286	diap286	Zetterstedt	1840	excisor	(Zetterstedt, 1840)	Psilus	excisor	Psilus excisor	Zetterstedt, 1840
diap	289	diap289	Thomson	1858	fossulata	(Thomson, 1858)	Belyta	fossulata	Belyta fossulata	Thomson, 1858
diap	290	diap290	Thomson	1858	fuscata	(Thomson, 1858)	Belyta	fuscata	Belyta fuscata	Thomson, 1858
diap	292	diap292	Thomson	1858	hemiptera	(Thomson, 1858)	Belyta	hemiptera	Belyta hemiptera	Thomson, 1858
diap	294	diap294	Kieffer	1909	microtoma	(Kieffer, 1909)	Aclista	microtoma	Aclista microtoma	Kieffer, 1909
diap	295	diap295	Thomson	1858	nigra	(Thomson, 1858)	Belyta	nigra	Belyta nigra	Thomson, 1858
diap	297	diap297	Thomson	1858	paralella	(Thomson, 1858)	Belyta	paralella	Belyta paralella	Thomson, 1858
diap	30	diap30	Kieffer	1909	analis	(Kieffer, 1909)	Anectata	analis	Anectata analis	Kieffer, 1909
diap	300	diap300	Kieffer	1909	pubescens	(Kieffer, 1909)	Aclista	pubescens	Aclista pubescens	Kieffer, 1909
diap	302	diap302	Curtis	1831	ruficornis	(Curtis, 1831)	Cinetus	ruficornis	Cinetus ruficornis	Curtis, 1831
diap	305	diap305	Kieffer	1907	soluta	(Kieffer, 1907)	Pantoclis	soluta	Pantoclis soluta	Kieffer, 1907
diap	306	diap306	Kieffer	1908	spinosipes	(Kieffer, 1908)	Aclista	spinosipes	Aclista spinosipes	Kieffer, 1908
diap	307	diap307	Kieffer	1909	striata	(Kieffer, 1909)	Aclista	striata	Aclista striata	Kieffer, 1909
diap	308	diap308	Thomson	1858	subaptera	(Thomson, 1858)	Belyta	subaptera	Belyta subaptera	Thomson, 1858
diap	31	diap31	Kieffer	1909	angusta	(Kieffer, 1909)	Anectata	angusta	Anectata angusta	Kieffer, 1909
diap	314	diap314	Kieffer	1909	variicornis	(Kieffer, 1909)	Aclista	variicornis	Aclista variicornis	Kieffer, 1909
diap	319	diap319	Haliday	1831	armata	(Haliday, 1831)	Cinetus	armata	Cinetus armata	Haliday, 1831
diap	33	diap33	Kieffer	1909	bitensis	(Kieffer, 1909)	Anectata	bitensis	Anectata bitensis	Kieffer, 1909
diap	335	diap335	Haliday	1857	heterocerus	(Haliday, 1857)	Belyta	heterocerus	Belyta heterocerus	Haliday, 1857
diap	34	diap34	Curtis	1831	cantiana	(Curtis, 1831)	Cinetus	cantiana	Cinetus cantiana	Curtis, 1831
diap	340	diap340	Thomson	1858	nervosum	(Thomson, 1858)	Cinetus	nervosum	Cinetus nervosum	Thomson, 1858
diap	359	diap359	Kieffer	1908	apertus	(Kieffer, 1908)	Rhynchopsilus	apertus	Rhynchopsilus apertus	Kieffer, 1908
diap	362	diap362	Haliday	1857	parvulum	(Haliday, 1857)	Belita	parvulum	Belita parvulum	Haliday, 1857
diap	37	diap37	Kieffer	1909	dubia	(Kieffer, 1909)	Anectata	dubia	Anectata dubia	Kieffer, 1909
diap	38	diap38	Thomson	1858	elevata	(Thomson, 1858)	Acoretus	elevata	Acoretus elevata	Thomson, 1858
diap	381	diap381	Thomson	1858	ciliata	(Thomson, 1858)	Belyta	ciliata	Belyta ciliata	Thomson, 1858
diap	400	diap400	Kieffer	1910	giraudi	(Kieffer, 1910)	Prosynacra	giraudi	Prosynacra giraudi	Kieffer, 1910
diap	407	diap407	Nees	1834	brachialis	(Nees, 1834)	Diapria	brachialis	Diapria brachialis	Nees, 1834
diap	41	diap41	Kieffer	1907	filicornis	(Kieffer, 1907)	Pantoclis	filicornis	Pantoclis filicornis	Kieffer, 1907
diap	411	diap411	Kieffer	1910	holconota	(Kieffer, 1910)	Prosynacra	holconota	Prosynacra holconota	Kieffer, 1910
diap	413	diap413	Kieffer	1904	sociabilis	(Kieffer, 1904)	Neuropria	sociabilis	Neuropria sociabilis	Kieffer, 1904
diap	43	diap43	Kieffer	1909	flavicornis	(Kieffer, 1909)	Anectata	flavicornis	Anectata flavicornis	Kieffer, 1909
diap	438	diap438	Kieffer	1911	bifoveatus	(Kieffer, 1911)	Loxotropa	bifoveatus	Loxotropa bifoveatus	Kieffer, 1911
diap	440	diap440	Kieffer	1911	ciliatus	(Kieffer, 1911)	Loxotropa	ciliatus	Loxotropa ciliatus	Kieffer, 1911
diap	442	diap442	Kieffer	1911	crassiceps	(Kieffer, 1911)	Loxotropa	crassiceps	Loxotropa crassiceps	Kieffer, 1911
diap	446	diap446	Marshall	1868	exiguus	(Marshall, 1868)	Loxotropa	exiguus	Loxotropa exiguus	Marshall, 1868
diap	447	diap447	Kieffer	1911	formicarum	(Kieffer, 1911)	Loxotropa	formicarum	Loxotropa formicarum	Kieffer, 1911
diap	45	diap45	Kieffer	1910	fusca	(Kieffer, 1910)	Xenotoma	fusca	Xenotoma fusca	Kieffer, 1910
diap	453	diap453	Kieffer	1911	helicicola	(Kieffer, 1911)	Loxotropa	helicicola	Loxotropa helicicola	Kieffer, 1911
diap	456	diap456	Kieffer	1911	longipennis	(Kieffer, 1911)	Loxotropa	longipennis	Loxotropa longipennis	Kieffer, 1911
diap	457	diap457	Kieffer	1911	luctuosus	(Kieffer, 1911)	Loxotropa	luctuosus	Loxotropa luctuosus	Kieffer, 1911
diap	458	diap458	Kieffer	1911	macroptera	(Kieffer, 1911)	Loxotropa	macroptera	Loxotropa macroptera	Kieffer, 1911
diap	465	diap465	Kieffer	1911	pedisequa	(Kieffer, 1911)	Loxotropa	pedisequa	Loxotropa pedisequa	Kieffer, 1911
diap	467	diap467	Kieffer	1911	rufocinctus	(Kieffer, 1911)	Loxotropa	rufocinctus	Loxotropa rufocinctus	Kieffer, 1911
diap	468	diap468	Kieffer	1911	scoticus	(Kieffer, 1911)	Loxotropa	scoticus	Loxotropa scoticus	Kieffer, 1911
diap	472	diap472	Marshall	1868	tripartitus	(Marshall, 1868)	Loxotropa	tripartitus	Loxotropa tripartitus	Marshall, 1868
diap	48	diap48	Kieffer	1907	fusciventris	(Kieffer, 1907)	Pantoclis	fusciventris	Pantoclis fusciventris	Kieffer, 1907
diap	484	diap484	Fabricius	1775	conica	(Fabricius, 1775)	Ichneumon	conica	Ichneumon conica	Fabricius, 1775
diap	49	diap49	Kieffer	1910	haemorrhoidalis	(Kieffer, 1910)	Xenotoma	haemorrhoidalis	Xenotoma haemorrhoidalis	Kieffer, 1910
diap	493	diap493	Nixon	1980	aphrodite	(Nixon, 1980)	Corynopria	aphrodite	Corynopria aphrodite	Nixon, 1980
		diap494	Haliday	1857	cincta	(Haliday, 1857)	Diapria (Corynopria)	cincta	Diapria (Corynopria) cincta	Haliday, 1857
diap	495	diap495	Thomson	1858	solida	(Thomson, 1858)	Corynopria	solida	Corynopria solida	Thomson, 1858
diap	526	diap526	Thomson	1858	aequata	(Thomson, 1858)	Diapria	aequata	Diapria aequata	Thomson, 1858
diap	53	diap53	Kieffer	1910	marshalli	(Kieffer, 1910)	Xenotoma	marshalli	Xenotoma marshalli	Kieffer, 1910
diap	532	diap532	Thomson	1858	basalis	(Thomson, 1858)	Diapria	basalis	Diapria basalis	Thomson, 1858
diap	535	diap535	Kieffer	1909	cameroni	(Kieffer, 1909)	Phaenopria	cameroni	Phaenopria cameroni	Kieffer, 1909
		diap538	Kieffer	1911	conotoma	(Kieffer, 1911)	Diapria (Tropidopria)	conotoma	Diapria (Tropidopria) conotoma	Kieffer, 1911
diap	54	diap54	Kieffer	1907	neglecta	(Kieffer, 1907)	Pantoclis	neglecta	Pantoclis neglecta	Kieffer, 1907
diap	545	diap545	Walker	1834	fucicola	(Walker, 1834)	Psilus	fucicola	Psilus fucicola	Walker, 1834
diap	548	diap548	Kieffer	1909	halterata	(Kieffer, 1909)	Phaenopria	halterata	Phaenopria halterata	Kieffer, 1909
diap	55	diap55	Kieffer	1907	nigriceps	(Kieffer, 1907)	Xenotoma	nigriceps	Xenotoma nigriceps	Kieffer, 1907
diap	555	diap555	Thomson	1858	hyalinipennis	(Thomson, 1858)	Diapria	hyalinipennis	Diapria hyalinipennis	Thomson, 1858
diap	559	diap559	Jansson	1955	incrassata	(Jansson, 1955)	Phaenopria	incrassata	Phaenopria incrassata	Jansson, 1955
diap	56	diap56	Thomson	1858	pallida	(Thomson, 1858)	Acoretus	pallida	Acoretus pallida	Thomson, 1858
diap	561	diap561	Ratzeburg	1848	modesta	(Ratzeburg, 1848)	Diapria	modesta	Diapria modesta	Ratzeburg, 1848
diap	564	diap564	Thomson	1858	morio	(Thomson, 1858)	Diapria	morio	Diapria morio	Thomson, 1858
diap	565	diap565	Nees	1834	nigra	(Nees, 1834)	Diapria	nigra	Diapria nigra	Nees, 1834
diap	57	diap57	Kieffer	1910	parvula	(Kieffer, 1910)	Xenotoma	parvula	Xenotoma parvula	Kieffer, 1910
diap	573	diap573	Marshall	1868	nigricornis	(Marshall, 1868)	Loxotropa	nigricornis	Loxotropa nigricornis	Marshall, 1868
diap	581	diap581	Thomson	1858	oogaster	(Thomson, 1858)	Diapria	oogaster	Diapria oogaster	Thomson, 1858
diap	587	diap587	Nees	1834	picipes	(Nees, 1834)	Diapria	picipes	Diapria picipes	Nees, 1834
diap	59	diap59	Kieffer	1907	prolongata	(Kieffer, 1907)	Pantoclis	prolongata	Pantoclis prolongata	Kieffer, 1907
diap	597	diap597	Kieffer	1911	subimpressa	(Kieffer, 1911)	Phaenopria	subimpressa	Phaenopria subimpressa	Kieffer, 1911
diap	60	diap60	Kieffer	1907	rufipes	(Kieffer, 1907)	Xenotoma	rufipes	Xenotoma rufipes	Kieffer, 1907
diap	603	diap603	Nees	1834	suspecta	(Nees, 1834)	Diapria	suspecta	Diapria suspecta	Nees, 1834
diap	607	diap607	Thomson	1858	tenuicornis	(Thomson, 1858)	Diapria	tenuicornis	Diapria tenuicornis	Thomson, 1858
diap	608	diap608	Thomson	1858	tritoma	(Thomson, 1858)	Diapria	tritoma	Diapria tritoma	Thomson, 1858
diap	61	diap61	Nees	1834	rufopetiolata	(Nees, 1834)	Belyta	rufopetiolata	Belyta rufopetiolata	Nees, 1834
diap	610	diap610	Latreille	1805	verticillata	(Latreille, 1805)	Diapria	verticillata	Diapria verticillata	Latreille, 1805
diap	616	diap616	Kieffer	1916	marshalli	(Kieffer, 1916)	Ashmeadopria	marshalli	Ashmeadopria marshalli	Kieffer, 1916
diap	618	diap618	Kieffer	1911	myrmecobia	(Kieffer, 1911)	Diapria	myrmecobia	Diapria myrmecobia	Kieffer, 1911
diap	619	diap619	Kieffer	1911	stilata	(Kieffer, 1911)	Diapria	stilata	Diapria stilata	Kieffer, 1911
diap	628	diap628	Schulz	1910	lacustris	(Schulz, 1910)	Ceratopria	lacustris	Ceratopria lacustris	Schulz, 1910
diap	65	diap65	Thomson	1858	scutellaris	(Thomson, 1858)	Acoretus	scutellaris	Acoretus scutellaris	Thomson, 1858
diap	66	diap66	Kieffer	1909	soror	(Kieffer, 1909)	Anectata	soror	Anectata soror	Kieffer, 1909
diap	660	diap660	Kieffer	1910	foersteri	(Kieffer, 1910)	Polypeza	foersteri	Polypeza foersteri	Kieffer, 1910
diap	668	diap668	Jansson	1942	inaequalifrons	(Jansson, 1942)	Galesus	inaequalifrons	Galesus inaequalifrons	Jansson, 1942
diap	67	diap67	Thomson	1858	striolata	(Thomson, 1858)	Acoretus	striolata	Acoretus striolata	Thomson, 1858
diap	679	diap679	Marshall	1867	caecutiens	(Marshall, 1867)	Galesus	caecutiens	Galesus caecutiens	Marshall, 1867
diap	682	diap682	Thomson	1858	frontalis	(Thomson, 1858)	Galesus	frontalis	Galesus frontalis	Thomson, 1858
diap	683	diap683	Curtis	1831	fuscipennis	(Curtis, 1831)	Galesus	fuscipennis	Galesus fuscipennis	Curtis, 1831
		diap688	Kieffer	1911	parvulus	(Kieffer, 1911)	Galesus (Galesus)	parvulus	Galesus (Galesus) parvulus	Kieffer, 1911
diap	689	diap689	Thomson	1858	rufipes	(Thomson, 1858)	Galesus	rufipes	Galesus rufipes	Thomson, 1858
		diap690	Kieffer	1911	submonilis	(Kieffer, 1911)	Galesus (Galesus)	submonilis	Galesus (Galesus) submonilis	Kieffer, 1911
diap	693	diap693	Haliday	1831	claviger	(Haliday, 1831)	Galesus	claviger	Galesus claviger	Haliday, 1831
		diap694	Kieffer	1911	foersteri	(Kieffer, 1911)	Galesus (Galesus)	foersteri	Galesus (Galesus) foersteri	Kieffer, 1911
diap	696	diap696	Kieffer	1906	walkeri	(Kieffer, 1906)	Galesus	walkeri	Galesus walkeri	Kieffer, 1906
		diap711	Kieffer	1911	bipunctata	(Kieffer, 1911)	Hemilexis (Hemilexis)	bipunctata	Hemilexis (Hemilexis) bipunctata	Kieffer, 1911
		diap715	Haliday	1857	perplexa	(Haliday, 1857)	Diapria (Glyphidopria)	perplexa	Diapria (Glyphidopria) perplexa	Haliday, 1857
		diap720	Haliday	1857	platyptera	(Haliday, 1857)	Diapria (Glyphidopria)	platyptera	Diapria (Glyphidopria) platyptera	Haliday, 1857
diap	73	diap73	Thomson	1858	flaviventris	(Thomson, 1858)	Cinetus	flaviventris	Cinetus flaviventris	Thomson, 1858
diap	731	diap731	Haliday	1833	maritima	(Haliday, 1833)	Psilus	maritima	Psilus maritima	Haliday, 1833
diap	744	diap744	Nees	1834	nervosus	(Nees, 1834)	Diapria	nervosus	Diapria nervosus	Nees, 1834
diap	751	diap751	Fonscolombe	1832	rufipes	(Fonscolombe, 1832)	Teleas	rufipes	Teleas rufipes	Fonscolombe, 1832
diap	80	diap80	Kieffer	1907	sciarivora	(Kieffer, 1907)	Zelotypa	sciarivora	Zelotypa sciarivora	Kieffer, 1907
diap	823	diap823	Haliday	1831	dorsiger	(Haliday, 1831)	Cinetus	dorsiger	Cinetus dorsiger	Haliday, 1831
diap	826	diap826	Thomson	1859	flavicornis	(Thomson, 1859)	Entomius	flavicornis	Entomius flavicornis	Thomson, 1859
platy	102	platy102	Kirby	1800	inserens	(Kirby, 1800)	Ichneumon	inserens	Ichneumon inserens	Kirby, 1800
platy	103	platy103	Nees	1834	punctiger	(Nees, 1834)	Platygaster	punctiger	Platygaster punctiger	Nees, 1834
platy	113	platy113	Walker	1835	halia	(Walker, 1835)	Platygaster	halia	Platygaster halia	Walker, 1835
platy	114	platy114	Walker	1835	laodice	(Walker, 1835)	MISSING FROM WORD	laodice	MISSING FROM WORD laodice	Walker, 1835
platy	117	platy117	Walker	1835	nice	(Walker, 1835)	Platygaster	nice	Platygaster nice	Walker, 1835
platy	118	platy118	Walker	1835	nydia	(Walker, 1835)	Platygaster	nydia	Platygaster nydia	Walker, 1835
platy	120	platy120	Debauche	1947	orchymonti	(Debauche, 1947)	Anacoryphe	orchymonti	Anacoryphe orchymonti	Debauche, 1947
platy	122	platy122	Walker	1835	ozines	(Walker, 1835)	Platygaster	ozines	Platygaster ozines	Walker, 1835
platy	123	platy123	Kirby	1798	tipulae	(Kirby, 1798)	Ichneumon	tipulae	Ichneumon tipulae	Kirby, 1798
platy	125	platy125	Kieffer	1913	tripartita	(Kieffer, 1913)	Amblyaspis	tripartita	Amblyaspis tripartita	Kieffer, 1913
platy	13	platy13	Walker	1838	boter	(Walker, 1838)	Inostemma	boter	Inostemma boter	Walker, 1838
platy	130	platy130	Haliday	1835	areolata	(Haliday, 1835)	Inostemma	areolata	Inostemma areolata	Haliday, 1835
platy	132	platy132	Walker	1838	ocalea	(Walker, 1838)	Inostemma	ocalea	Inostemma ocalea	Walker, 1838
platy	137	platy137	Kieffer	1916	lasiopterae	(Kieffer, 1916)	Disynopeas	lasiopterae	Disynopeas lasiopterae	Kieffer, 1916
platy	14	platy14	Kieffer	1913	humilis	(Kieffer, 1913)	Acerota	humilis	Acerota humilis	Kieffer, 1913
platy	141	platy141	Walker	1835	catillus	(Walker, 1835)	Platygaster	catillus	Platygaster catillus	Walker, 1835
platy	143	platy143	Walker	1835	mamertes	(Walker, 1835)	Platygaster	mamertes	Platygaster mamertes	Walker, 1835
platy	144	platy144	Walker	1835	seron	(Walker, 1835)	Platygaster	seron	Platygaster seron	Walker, 1835
platy	17	platy17	Walker	1835	abas	(Walker, 1835)	Platygaster	abas	Platygaster abas	Walker, 1835
platy	176	platy176	Kieffer	1916	betulae	(Kieffer, 1916)	Misocyclops	betulae	Misocyclops betulae	Kieffer, 1916
platy	18	platy18	Walker	1835	belus	(Walker, 1835)	Platygaster	belus	Platygaster belus	Walker, 1835
platy	19	platy19	Walker	1835	crates	(Walker, 1835)	Platygaster	crates	Platygaster crates	Walker, 1835
platy	20	platy20	Walker	1835	nereus	(Walker, 1835)	Platygaster	nereus	Platygaster nereus	Walker, 1835
platy	205	platy205	Kieffer	1913	enneatoma	(Kieffer, 1913)	Epimeces	enneatoma	Epimeces enneatoma	Kieffer, 1913
platy	207	platy207	Westwood	1833	ensifer	(Westwood, 1833)	Epimeces	ensifer	Epimeces ensifer	Westwood, 1833
platy	21	platy21	Walker	1835	otreus	(Walker, 1835)	Platygaster	otreus	Platygaster otreus	Walker, 1835
platy	212	platy212	Kieffer	1916	floricola	(Kieffer, 1916)	Prosactogaster	floricola	Prosactogaster floricola	Kieffer, 1916
platy	22	platy22	Walker	1835	prorsa	(Walker, 1835)	Platygaster	prorsa	Platygaster prorsa	Walker, 1835
platy	23	platy23	Haliday	1835	roboris	(Haliday, 1835)	Platygaster	roboris	Platygaster roboris	Haliday, 1835
platy	235	platy235	Kieffer	1916	?leucanthemi	(Kieffer, 1916)	Misocyclops	?leucanthemi	Misocyclops ?leucanthemi	Kieffer, 1916
platy	250	platy250	Kieffer	1916	marshalli	(Kieffer, 1916)	Prosactogaster	marshalli	Prosactogaster marshalli	Kieffer, 1916
platy	280	platy280	Schrank	1781	phragmitis	(Schrank, 1781)	Cynips	phragmitis	Cynips phragmitis	Schrank, 1781
platy	289	platy289	Kieffer	1916	quadrifaria	(Kieffer, 1916)	Polygnotus	quadrifaria	Polygnotus quadrifaria	Kieffer, 1916
platy	29	platy29	Haliday	1835	scelionoides	(Haliday, 1835)	Platygaster	scelionoides	Platygaster scelionoides	Haliday, 1835
platy	295	platy295	Förster	1861	signata	(Förster, 1861)	Polygnotus	signata	Polygnotus signata	Förster, 1861
platy	308	platy308	Kieffer	1926	subuliformis	(Kieffer, 1926)	Prosactogaster	subuliformis	Prosactogaster subuliformis	Kieffer, 1926
platy	311	platy311	Kieffer	1926	suecica	(Kieffer, 1926)	MISSING FROM WORD	suecica	MISSING FROM WORD suecica	Kieffer, 1926
platy	33	platy33	Walker	1835	tritici	(Walker, 1835)	Platygaster	tritici	Platygaster tritici	Walker, 1835
platy	34	platy34	Walker	1835	vestina	(Walker, 1835)	Platygaster	vestina	Platygaster vestina	Walker, 1835
platy	343	platy343	Walker	1835	craterus	(Walker, 1835)	Platygaster	craterus	Platygaster craterus	Walker, 1835
platy	346	platy346	Förster	1856	curvicauda	(Förster, 1856)	Sactogaster	curvicauda	Sactogaster curvicauda	Förster, 1856
platy	351	platy351	Walker	1835	euryale	(Walker, 1835)	Platygaster	euryale	Platygaster euryale	Walker, 1835
platy	357	platy357	Walker	1835	hyllus	(Walker, 1835)	Platygaster	hyllus	Platygaster hyllus	Walker, 1835
platy	360	platy360	Walker	1835	jasius	(Walker, 1835)	Platygaster	jasius	Platygaster jasius	Walker, 1835
platy	361	platy361	Walker	1835	larides	(Walker, 1835)	Platygaster	larides	Platygaster larides	Walker, 1835
platy	366	platy366	Walker	1835	myles	(Walker, 1835)	Platygaster	myles	Platygaster myles	Walker, 1835
platy	370	platy370	Walker	1835	osaces	(Walker, 1835)	Platygaster	osaces	Platygaster osaces	Walker, 1835
platy	371	platy371	Walker	1835	rhanis	(Walker, 1835)	Platygaster	rhanis	Platygaster rhanis	Walker, 1835
platy	375	platy375	Walker	1835	sosis	(Walker, 1835)	Platygaster	sosis	Platygaster sosis	Walker, 1835
platy	377	platy377	Walker	1835	tarsa	(Walker, 1835)	Platygaster	tarsa	Platygaster tarsa	Walker, 1835
platy	378	platy378	Walker	1835	trebius	(Walker, 1835)	Platygaster	trebius	Platygaster trebius	Walker, 1835
platy	379	platy379	Walker	1835	velutinum	(Walker, 1835)	Platygaster	velutinum	Platygaster velutinum	Walker, 1835
platy	380	platy380	Westwood	1833	ventrale	(Westwood, 1833)	Epimeces	ventrale	Epimeces ventrale	Westwood, 1833
platy	385	platy385	Walker	1835	didas	(Walker, 1835)	Platygaster	didas	Platygaster didas	Walker, 1835
platy	386	platy386	Walker	1835	pisis	(Walker, 1835)	Platygaster	pisis	Platygaster pisis	Walker, 1835
platy	388	platy388	Walker	1835	remulus	(Walker, 1835)	Platygaster	remulus	Platygaster remulus	Walker, 1835
platy	395	platy395	Walker	1836	aethra	(Walker, 1836)	Telenomus	aethra	Telenomus aethra	Walker, 1836
platy	396	platy396	Walker	1836	asramanes	(Walker, 1836)	Trimorus	asramanes	Trimorus asramanes	Walker, 1836
platy	412	platy412	Kieffer	1913	hospes	(Kieffer, 1913)	Plesiobaeus	hospes	Plesiobaeus hospes	Kieffer, 1913
platy	43	platy43	Walker	1835	cochleata	(Walker, 1835)	Platygaster	cochleata	Platygaster cochleata	Walker, 1835
platy	439	platy439	Kieffer	1908	bicolor	(Kieffer, 1908)	Anteris	bicolor	Anteris bicolor	Kieffer, 1908
platy	467	platy467	Marchal	1901	gerriphagus	(Marchal, 1901)	Limnodytes	gerriphagus	Limnodytes gerriphagus	Marchal, 1901
platy	47	platy47	Haliday	1835	laricis	(Haliday, 1835)	Platygaster	laricis	Platygaster laricis	Haliday, 1835
platy	476	platy476	Walker	1838	europus	(Walker, 1838)	Inostemma	europus	Inostemma europus	Walker, 1838
platy	477	platy477	Walker	1836	mecrida	(Walker, 1836)	Inostemma	mecrida	Inostemma mecrida	Walker, 1836
platy	482	platy482	Förster	1878	longicornis	(Förster, 1878)	Zacrita	longicornis	Zacrita longicornis	Förster, 1878
platy	495	platy495	Thomson	1859	transversus	(Thomson, 1859)	Anopedias	transversus	Anopedias transversus	Thomson, 1859
platy	503	platy503	Latreille	1805	clavicornis	(Latreille, 1805)	Scelio	clavicornis	Scelio clavicornis	Latreille, 1805
platy	521	platy521	Walker	1836	aegle	(Walker, 1836)	Teleas	aegle	Teleas aegle	Walker, 1836
platy	522	platy522	Kieffer	1911	algicola	(Kieffer, 1911)	Paragryon	algicola	Paragryon algicola	Kieffer, 1911
platy	523	platy523	Kieffer	1908	angustipennis	(Kieffer, 1908)	Hoplogryon	angustipennis	Hoplogryon angustipennis	Kieffer, 1908
platy	524	platy524	Kieffer	1908	antennalis	(Kieffer, 1908)	Hoplogryon	antennalis	Hoplogryon antennalis	Kieffer, 1908
platy	525	platy525	Walker	1836	apricans	(Walker, 1836)	Teleas	apricans	Teleas apricans	Walker, 1836
platy	526	platy526	Walker	1836	aratus	(Walker, 1836)	Teleas	aratus	Teleas aratus	Walker, 1836
platy	527	platy527	Kieffer	1908	bacilliger	(Kieffer, 1908)	Hoplogryon	bacilliger	Hoplogryon bacilliger	Kieffer, 1908
platy	528	platy528	Walker	1836	bassus	(Walker, 1836)	Teleas	bassus	Teleas bassus	Walker, 1836
platy	529	platy529	Thomson	1859	brevicollis	(Thomson, 1859)	Prosacantha	brevicollis	Prosacantha brevicollis	Thomson, 1859
platy	530	platy530	Kieffer	1908	cameroni	(Kieffer, 1908)	Hoplogryon	cameroni	Hoplogryon cameroni	Kieffer, 1908
platy	531	platy531	Kieffer	1908	carinatus	(Kieffer, 1908)	Hoplogryon	carinatus	Hoplogryon carinatus	Kieffer, 1908
platy	532	platy532	Kieffer	1908	carinifrons	(Kieffer, 1908)	Hoplogryon	carinifrons	Hoplogryon carinifrons	Kieffer, 1908
platy	533	platy533	Walker	1836	cephisus	(Walker, 1836)	Teleas	cephisus	Teleas cephisus	Walker, 1836
platy	534	platy534	Walker	1836	chesias	(Walker, 1836)	Teleas	chesias	Teleas chesias	Walker, 1836
platy	535	platy535	Walker	1836	chyllene	(Walker, 1836)	Teleas	chyllene	Teleas chyllene	Walker, 1836
platy	536	platy536	Walker	1836	elatior	(Walker, 1836)	Teleas	elatior	Teleas elatior	Walker, 1836
platy	537	platy537	Kieffer	1908	elongatus	(Kieffer, 1908)	Hoplogryon	elongatus	Hoplogryon elongatus	Kieffer, 1908
platy	538	platy538	Walker	1836	ephippium	(Walker, 1836)	Teleas	ephippium	Teleas ephippium	Walker, 1836
platy	539	platy539	Walker	1836	flavipes	(Walker, 1836)	Teleas	flavipes	Teleas flavipes	Walker, 1836
platy	54	platy54	Fitch	1861	error	(Fitch, 1861)	Platygaster	error	Platygaster error	Fitch, 1861
platy	549	platy549	Walker	1836	galba	(Walker, 1836)	Teleas	galba	Teleas galba	Walker, 1836
platy	550	platy550	Walker	1836	glaucus	(Walker, 1836)	Teleas	glaucus	Teleas glaucus	Walker, 1836
platy	551	platy551	Kieffer	1912	halteratus	(Kieffer, 1912)	Hoplogryon	halteratus	Hoplogryon halteratus	Kieffer, 1912
platy	552	platy552	Walker	1836	lamus	(Walker, 1836)	Teleas	lamus	Teleas lamus	Walker, 1836
platy	553	platy553	Kieffer	1908	levigena	(Kieffer, 1908)	Hoplogryon	levigena	Hoplogryon levigena	Kieffer, 1908
platy	554	platy554	Walker	1836	lycaon	(Walker, 1836)	Teleas	lycaon	Teleas lycaon	Walker, 1836
platy	555	platy555	Kieffer	1913	marshalli	(Kieffer, 1913)	Hoplogryon	marshalli	Hoplogryon marshalli	Kieffer, 1913
platy	556	platy556	Kieffer	1908	micropterus	(Kieffer, 1908)	Hoplogryon	micropterus	Hoplogryon micropterus	Kieffer, 1908
platy	557	platy557	Kieffer	1911	myrmecobius	(Kieffer, 1911)	Hoplogryon	myrmecobius	Hoplogryon myrmecobius	Kieffer, 1911
platy	558	platy558	Kieffer	1911	myrmecophilus	(Kieffer, 1911)	Paragryon	myrmecophilus	Paragryon myrmecophilus	Kieffer, 1911
platy	559	platy559	Walker	1836	nanno	(Walker, 1836)	Gryon	nanno	Gryon nanno	Walker, 1836
platy	560	platy560	Thomson	1859	nitidulus	(Thomson, 1859)	Prosacantha	nitidulus	Prosacantha nitidulus	Thomson, 1859
platy	566	platy566	Walker	1836	ocyroe	(Walker, 1836)	Teleas	ocyroe	Teleas ocyroe	Walker, 1836
platy	567	platy567	Thomson	1859	opacus	(Thomson, 1859)	Prosacantha	opacus	Prosacantha opacus	Thomson, 1859
platy	569	platy569	Thomson	1859	ovatus	(Thomson, 1859)	Prosacantha	ovatus	Prosacantha ovatus	Thomson, 1859
platy	573	platy573	Walker	1836	paula	(Walker, 1836)	Teleas	paula	Teleas paula	Walker, 1836
platy	574	platy574	Walker	1836	procris	(Walker, 1836)	Teleas	procris	Teleas procris	Walker, 1836
platy	575	platy575	Kieffer	1908	punctatifrons	(Kieffer, 1908)	Hoplogryon	punctatifrons	Hoplogryon punctatifrons	Kieffer, 1908
platy	576	platy576	Thomson	1859	puncticollis	(Thomson, 1859)	Prosacantha	puncticollis	Prosacantha puncticollis	Thomson, 1859
platy	579	platy579	Kieffer	1908	rufonotatus	(Kieffer, 1908)	Hoplogryon	rufonotatus	Hoplogryon rufonotatus	Kieffer, 1908
platy	580	platy580	Kieffer	1908	sectigena	(Kieffer, 1908)	Hoplogryon	sectigena	Hoplogryon sectigena	Kieffer, 1908
platy	581	platy581	Kieffer	1908	striatigena	(Kieffer, 1908)	Hoplogryon	striatigena	Hoplogryon striatigena	Kieffer, 1908
platy	582	platy582	Walker	1836	therycides	(Walker, 1836)	Teleas	therycides	Teleas therycides	Walker, 1836
platy	593	platy593	Walker	1836	timareta	(Walker, 1836)	Teleas	timareta	Teleas timareta	Walker, 1836
platy	594	platy594	Kieffer	1908	tuberculatus	(Kieffer, 1908)	Hoplogryon	tuberculatus	Hoplogryon tuberculatus	Kieffer, 1908
platy	595	platy595	Walker	1836	varicornis	(Walker, 1836)	Teleas	varicornis	Teleas varicornis	Walker, 1836
platy	601	platy601	Walker	1836	xenetus	(Walker, 1836)	Teleas	xenetus	Teleas xenetus	Walker, 1836
platy	643	platy643	Ratzeburg	1844	dalmanni	(Ratzeburg, 1844)	Teleas	dalmanni	Teleas dalmanni	Ratzeburg, 1844
platy	646	platy646	Szelényi	1939	danubialis	(Szelényi, 1939)	Platytelenomus	danubialis	Platytelenomus danubialis	Szelényi, 1939
platy	659	platy659	Ratzeburg	1844	laeviusculus	(Ratzeburg, 1844)	Teleas	laeviusculus	Teleas laeviusculus	Ratzeburg, 1844
platy	663	platy663	Westwood	1833	minutus	(Westwood, 1833)	Hemisius	minutus	Hemisius minutus	Westwood, 1833
platy	665	platy665	Thomson	1861	nitidulus	(Thomson, 1861)	Phanurus	nitidulus	Phanurus nitidulus	Thomson, 1861
platy	67	platy67	Jurine	1807	boscii	(Jurine, 1807)	Psilus	boscii	Psilus boscii	Jurine, 1807
platy	671	platy671	Nees	1834	phalaenarum	(Nees, 1834)	Teleas	phalaenarum	Teleas phalaenarum	Nees, 1834
platy	674	platy674	Ratzeburg	1844	punctatissimus	(Ratzeburg, 1844)	Teleas	punctatissimus	Teleas punctatissimus	Ratzeburg, 1844
platy	677	platy677	Thomson	1861	tetratomus	(Thomson, 1861)	Phanurus	tetratomus	Phanurus tetratomus	Thomson, 1861
platy	683	platy683	Nees	1834	truncatus	(Nees, 1834)	Teleas	truncatus	Teleas truncatus	Nees, 1834
platy	697	platy697	Walker	1838	arminon	(Walker, 1838)	Telenomus	arminon	Telenomus arminon	Walker, 1838
platy	698	platy698	Walker	1836	belenus	(Walker, 1836)	Telenomus	belenus	Telenomus belenus	Walker, 1836
platy	699	platy699	Javahery	1968	davatchii	(Javahery, 1968)	Asolcus	davatchii	Asolcus davatchii	Javahery, 1968
platy	700	platy700	Thomson	1860	flavipes	(Thomson, 1860)	Telenomus	flavipes	Telenomus flavipes	Thomson, 1860
platy	701	platy701	Thomson	1861	grandis	(Thomson, 1861)	Telenomus	grandis	Telenomus grandis	Thomson, 1861
platy	707	platy707	Walker	1838	theste	(Walker, 1838)	Telenomus	theste	Telenomus theste	Walker, 1838
platy	708	platy708	Javahery	1968	waloffae	(Javahery, 1968)	Asolcus	waloffae	Asolcus waloffae	Javahery, 1968
platy	712	platy712	Walker	1836	laricis	(Walker, 1836)	Telenomus	laricis	Telenomus laricis	Walker, 1836
platy	90	platy90	Walker	1835	cotta	(Walker, 1835)	Platygaster	cotta	Platygaster cotta	Walker, 1835
platy	91	platy91	Walker	1835	erato	(Walker, 1835)	Platygaster	erato	Platygaster erato	Walker, 1835
platy	92	platy92	Nees	1834	grandis	(Nees, 1834)	Platygaster	grandis	Platygaster grandis	Nees, 1834
platy	94	platy94	Walker	1835	matuta	(Walker, 1835)	Platygaster	matuta	Platygaster matuta	Walker, 1835
procto	104	procto104	Haliday	1839	brevicornis	(Haliday, 1839)	Proctotrupes	brevicornis	Proctotrupes brevicornis	Haliday, 1839
procto	11	procto11	Panzer	1798	anomalipes	(Panzer, 1798)	Sphex	anomalipes	Sphex anomalipes	Panzer, 1798
procto	111	procto111	Stelfox	1950	arcuator	(Stelfox, 1950)	Cryptoserphus	arcuator	Cryptoserphus arcuator	Stelfox, 1950
procto	115	procto115	Haliday	1839	apterogynus	(Haliday, 1839)	Proctotrupes	apterogynus	Proctotrupes apterogynus	Haliday, 1839
procto	121	procto121	Haliday	1839	elongatus	(Haliday, 1839)	Proctotrupes	elongatus	Proctotrupes elongatus	Haliday, 1839
procto	126	procto126	Morley	1922	chittii	(Morley, 1922)	Proctotrypes	chittii	Proctotrypes chittii	Morley, 1922
procto	128	procto128	Haliday	1839	fuscipes	(Haliday, 1839)	Proctotrupes	fuscipes	Proctotrupes fuscipes	Haliday, 1839
procto	130	procto130	Jurine	1807	pallipes	(Jurine, 1807)	Codrus	pallipes	Codrus pallipes	Jurine, 1807
procto	133	procto133	Haliday	1839	viator	(Haliday, 1839)	Proctotrupes	viator	Proctotrupes viator	Haliday, 1839
procto	139	procto139	Haliday	1839	calcar	(Haliday, 1839)	Proctotrupes	calcar	Proctotrupes calcar	Haliday, 1839
procto	152	procto152	Schrank	1780	brachypterus	(Schrank, 1780)	Serphus	brachypterus	Serphus brachypterus	Schrank, 1780
procto	163	procto163	Linnaeus	1758	gravidator	(Linnaeus, 1758)	Ichneumon	gravidator	Ichneumon gravidator	Linnaeus, 1758
procto	171	procto171	Haliday	1839	laricis	(Haliday, 1839)	Proctotrupes	laricis	Proctotrupes laricis	Haliday, 1839
procto	174	procto174	Nixon	1942	perkinsi	(Nixon, 1942)	Cryptoserphus	perkinsi	Cryptoserphus perkinsi	Nixon, 1942
procto	177	procto177	Möller	1882	[foveolatus	(Möller, 1882)	Proctotrupes	[foveolatus	Proctotrupes [foveolatus	Möller, 1882
procto	26	procto26	Nees	1834	parvulus	(Nees, 1834)	Codrus	parvulus	Codrus parvulus	Nees, 1834
procto	30	procto30	Förster	1856	picicornis	(Förster, 1856)	Disogmus	picicornis	Disogmus picicornis	Förster, 1856
procto	36	procto36	Haliday	1839	aculeator	(Haliday, 1839)	Proctotrupes	aculeator	Proctotrupes aculeator	Haliday, 1839
procto	41	procto41	Provancher	1881	flavipes	(Provancher, 1881)	Proctotrupes	flavipes	Proctotrupes flavipes	Provancher, 1881
procto	46	procto46	Thomson	1858	longitarsis	(Thomson, 1858)	Proctotrupes	longitarsis	Proctotrupes longitarsis	Thomson, 1858
procto	49	procto49	Haliday	1839	areolator	(Haliday, 1839)	Proctotrupes	areolator	Proctotrupes areolator	Haliday, 1839
procto	59	procto59	Thomson	1858	basalis	(Thomson, 1858)	Proctotrupes	basalis	Proctotrupes basalis	Thomson, 1858
procto	64	procto64	Gravenhorst	1807	ater	(Gravenhorst, 1807)	Codrus	ater	Codrus ater	Gravenhorst, 1807
procto	72	procto72	Nees	1834	crenicornis	(Nees, 1834)	Codrus	crenicornis	Codrus crenicornis	Nees, 1834
procto	77	procto77	Nees	1834	ligatus	(Nees, 1834)	Codrus	ligatus	Codrus ligatus	Nees, 1834
procto	78	procto78	Nees	1834	longicornis	(Nees, 1834)	Codrus	longicornis	Codrus longicornis	Nees, 1834
procto	87	procto87	Ashmead	1893	quadriceps	(Ashmead, 1893)	Proctotrypes	quadriceps	Proctotrypes quadriceps	Ashmead, 1893
										,
